# Supplementary material for: Simulating the restoration of normal gene expression from different thyroid cancer stages using deep learning
Source: BMC Cancer. 2022 Jun 4;22:612. doi: 10.1186/s12885-022-09704-z (PMC9166476; doi:10.1186/s12885-022-09704-z)
Supplement: Supplementary file 1 — Additional file 1. [file 12885_2022_9704_MOESM1_ESM.xlsx]

## Sheet: S1
Table S1. Biospecimen data for THCA samples in the TCGA project downloaded from GDC data portal.
project_id	case_id	case_submitter_id	sample_id	sample_submitter_id	biospecimen_anatomic_site	biospecimen_laterality	catalog_reference	composition	current_weight	days_to_collection	days_to_sample_procurement	diagnosis_pathologically_confirmed	distance_normal_to_tumor	distributor_reference	freezing_method	growth_rate	initial_weight	intermediate_dimension	is_ffpe	longest_dimension	method_of_sample_procurement	oct_embedded	passage_count	pathology_report_uuid	preservation_method	sample_type	sample_type_id	shortest_dimension	state	time_between_clamping_and_freezing	time_between_excision_and_freezing	tissue_collection_type	tissue_type	tumor_code	tumor_code_id	tumor_descriptor
TCGA-THCA	12ecc0e5-8cb8-406e-ac9f-4f8c22b64fc1	TCGA-ET-A25P	63731c89-4488-442b-842a-84268ebeda4d	TCGA-ET-A25P-10A	'--	'--	'--	'--	'--	523	'--	'--	'--	'--	'--	'--	'--	'--	FALSE	'--	'--	false	'--	'--	'--	Blood Derived Normal	10	'--	released	'--	'--	'--	Not Reported	'--	'--	'--
TCGA-THCA	12ecc0e5-8cb8-406e-ac9f-4f8c22b64fc1	TCGA-ET-A25P	c7146f26-5c75-4a56-a94b-c8a03c15a6f1	TCGA-ET-A25P-01A	'--	'--	'--	'--	'--	523	'--	'--	'--	'--	'--	'--	50.0	'--	FALSE	'--	'--	true	'--	7DB080AA-113F-4F72-8379-6390122762D2	'--	Primary Tumor	1	'--	released	'--	'--	'--	Not Reported	'--	'--	'--
TCGA-THCA	12ecc0e5-8cb8-406e-ac9f-4f8c22b64fc1	TCGA-ET-A25P	29e2e816-e249-4409-a18c-7058829bcc14	TCGA-ET-A25P-01Z	'--	'--	'--	'--	'--	'--	0	'--	'--	'--	'--	'--	'--	'--	TRUE	'--	'--	No	'--	'--	FFPE	Primary Tumor	1	'--	released	'--	'--	'--	Not Reported	'--	'--	'--
TCGA-THCA	e23cd75a-06ad-4da0-b19b-b812b0f6c1b9	TCGA-ET-A25G	78534da5-68b8-4314-be0b-2c27ccdc3fbf	TCGA-ET-A25G-10A	'--	'--	'--	'--	'--	1071	'--	'--	'--	'--	'--	'--	'--	'--	FALSE	'--	'--	false	'--	'--	'--	Blood Derived Normal	10	'--	released	'--	'--	'--	Not Reported	'--	'--	'--
TCGA-THCA	e23cd75a-06ad-4da0-b19b-b812b0f6c1b9	TCGA-ET-A25G	b1e8d535-2dcd-4e24-b117-c263fb0cabc9	TCGA-ET-A25G-01A	'--	'--	'--	'--	'--	1071	'--	'--	'--	'--	'--	'--	120.0	'--	FALSE	'--	'--	true	'--	DC56DF43-2D17-490A-AE01-5C007031C3C8	'--	Primary Tumor	1	'--	released	'--	'--	'--	Not Reported	'--	'--	'--
TCGA-THCA	e23cd75a-06ad-4da0-b19b-b812b0f6c1b9	TCGA-ET-A25G	67670811-402f-417a-afed-955a639125b1	TCGA-ET-A25G-01Z	'--	'--	'--	'--	'--	'--	0	'--	'--	'--	'--	'--	'--	'--	TRUE	'--	'--	No	'--	'--	FFPE	Primary Tumor	1	'--	released	'--	'--	'--	Not Reported	'--	'--	'--
TCGA-THCA	a5406575-c840-475a-ab1b-e1a159413fbd	TCGA-CE-A482	eb1698fe-ae06-4b72-9d26-6e0a1d5325ba	TCGA-CE-A482-01Z	'--	'--	'--	'--	'--	'--	0	'--	'--	'--	'--	'--	'--	'--	TRUE	'--	'--	No	'--	'--	FFPE	Primary Tumor	1	'--	released	'--	'--	'--	Not Reported	'--	'--	'--
TCGA-THCA	a5406575-c840-475a-ab1b-e1a159413fbd	TCGA-CE-A482	4eec8d9f-6e2f-4a4d-ab27-5d5bf2f5773b	TCGA-CE-A482-10A	'--	'--	'--	'--	'--	263	'--	'--	'--	'--	'--	'--	'--	'--	FALSE	'--	'--	false	'--	'--	'--	Blood Derived Normal	10	'--	released	'--	'--	'--	Not Reported	'--	'--	'--
TCGA-THCA	a5406575-c840-475a-ab1b-e1a159413fbd	TCGA-CE-A482	5185f8fd-3cac-4cf0-9341-174529286656	TCGA-CE-A482-01A	'--	'--	'--	'--	'--	263	'--	'--	'--	'--	'--	'--	410.0	'--	FALSE	'--	'--	true	'--	45D4405A-942D-494A-98F6-5285062E5311	'--	Primary Tumor	1	'--	released	'--	'--	'--	Not Reported	'--	'--	'--
TCGA-THCA	13577a2b-ee68-45e5-96a8-b1fd71fc62da	TCGA-DJ-A2PU	efb13c07-156a-434a-8f99-442a0745b8fd	TCGA-DJ-A2PU-01A	'--	'--	'--	'--	'--	202	'--	'--	'--	'--	'--	'--	380.0	'--	FALSE	'--	'--	true	'--	AD5BA4BB-1EE5-4449-9942-79A097DE713A	'--	Primary Tumor	1	'--	released	'--	'--	'--	Not Reported	'--	'--	'--
TCGA-THCA	13577a2b-ee68-45e5-96a8-b1fd71fc62da	TCGA-DJ-A2PU	d405e343-090d-41a5-96a1-7bb32ab844bf	TCGA-DJ-A2PU-10A	'--	'--	'--	'--	'--	202	'--	'--	'--	'--	'--	'--	'--	'--	FALSE	'--	'--	false	'--	'--	'--	Blood Derived Normal	10	'--	released	'--	'--	'--	Not Reported	'--	'--	'--
TCGA-THCA	13577a2b-ee68-45e5-96a8-b1fd71fc62da	TCGA-DJ-A2PU	e99c72bd-34f5-4a25-ae10-0704aae1648b	TCGA-DJ-A2PU-01Z	'--	'--	'--	'--	'--	'--	0	'--	'--	'--	'--	'--	'--	'--	TRUE	'--	'--	No	'--	'--	FFPE	Primary Tumor	1	'--	released	'--	'--	'--	Not Reported	'--	'--	'--
TCGA-THCA	59e47734-96de-4328-aca7-e9423dda9c52	TCGA-E3-A3DZ	5bf80875-fcd1-4e68-836a-4f418685962a	TCGA-E3-A3DZ-10A	'--	'--	'--	'--	'--	359	'--	'--	'--	'--	'--	'--	'--	'--	FALSE	'--	'--	false	'--	'--	'--	Blood Derived Normal	10	'--	released	'--	'--	'--	Not Reported	'--	'--	'--
TCGA-THCA	59e47734-96de-4328-aca7-e9423dda9c52	TCGA-E3-A3DZ	cc1213a0-bc99-4505-9b20-42fea416f6ab	TCGA-E3-A3DZ-01A	'--	'--	'--	'--	'--	303	'--	'--	'--	'--	'--	'--	260.0	'--	FALSE	'--	'--	false	'--	B9BD9C12-4F77-4B8F-9C8E-316CA441FC6A	'--	Primary Tumor	1	'--	released	'--	'--	'--	Not Reported	'--	'--	'--
TCGA-THCA	59e47734-96de-4328-aca7-e9423dda9c52	TCGA-E3-A3DZ	574b4284-29db-4a92-a072-2cc7cb22fefb	TCGA-E3-A3DZ-01Z	'--	'--	'--	'--	'--	'--	0	'--	'--	'--	'--	'--	'--	'--	TRUE	'--	'--	No	'--	'--	FFPE	Primary Tumor	1	'--	released	'--	'--	'--	Not Reported	'--	'--	'--
TCGA-THCA	a3810f36-d2b4-4a45-ad08-a4dbfb9d27aa	TCGA-BJ-A0ZG	854bd113-7caf-41d7-8f15-79db81e84d28	TCGA-BJ-A0ZG-01Z	'--	'--	'--	'--	'--	'--	0	'--	'--	'--	'--	'--	'--	'--	TRUE	'--	'--	No	'--	'--	FFPE	Primary Tumor	1	'--	released	'--	'--	'--	Not Reported	'--	'--	'--
TCGA-THCA	a3810f36-d2b4-4a45-ad08-a4dbfb9d27aa	TCGA-BJ-A0ZG	3ac025c9-fec6-4997-8630-085750dc84e0	TCGA-BJ-A0ZG-01A	'--	'--	'--	'--	'--	68	'--	'--	'--	'--	'--	'--	210.0	'--	FALSE	'--	'--	true	'--	A2821B1D-5D8B-45B0-8976-99A15E49B84E	'--	Primary Tumor	1	'--	released	'--	'--	'--	Not Reported	'--	'--	'--
TCGA-THCA	a3810f36-d2b4-4a45-ad08-a4dbfb9d27aa	TCGA-BJ-A0ZG	cf6d9496-441b-4ed1-90d0-bde9f2c8fd61	TCGA-BJ-A0ZG-10A	'--	'--	'--	'--	'--	68	'--	'--	'--	'--	'--	'--	'--	'--	FALSE	'--	'--	false	'--	'--	'--	Blood Derived Normal	10	'--	released	'--	'--	'--	Not Reported	'--	'--	'--
TCGA-THCA	331cae6e-2868-4c58-9302-709a9ff7d025	TCGA-BJ-A0Z3	0d038030-1619-41c3-8799-be5ea1bff187	TCGA-BJ-A0Z3-01Z	'--	'--	'--	'--	'--	'--	0	'--	'--	'--	'--	'--	'--	'--	TRUE	'--	'--	No	'--	'--	FFPE	Primary Tumor	1	'--	released	'--	'--	'--	Not Reported	'--	'--	'--
TCGA-THCA	331cae6e-2868-4c58-9302-709a9ff7d025	TCGA-BJ-A0Z3	ce23632d-ea12-422b-aa3a-78874e665e4d	TCGA-BJ-A0Z3-10A	'--	'--	'--	'--	'--	162	'--	'--	'--	'--	'--	'--	'--	'--	FALSE	'--	'--	false	'--	'--	'--	Blood Derived Normal	10	'--	released	'--	'--	'--	Not Reported	'--	'--	'--
TCGA-THCA	331cae6e-2868-4c58-9302-709a9ff7d025	TCGA-BJ-A0Z3	6bf032c1-b7d5-4b1c-bf41-c9bfeafa5e7a	TCGA-BJ-A0Z3-01A	'--	'--	'--	'--	'--	162	'--	'--	'--	'--	'--	'--	390.0	'--	FALSE	'--	'--	true	'--	EDF3F3EB-AC62-403D-9180-147C2CFD2AA5	'--	Primary Tumor	1	'--	released	'--	'--	'--	Not Reported	'--	'--	'--
TCGA-THCA	039bfc94-fadd-440a-aade-a1595128583e	TCGA-J8-A3O2	aba9a48d-cd5b-4031-a517-6f4b9619b490	TCGA-J8-A3O2-01A	'--	'--	'--	'--	'--	89	'--	'--	'--	'--	'--	'--	230.0	'--	FALSE	'--	'--	true	'--	91411CD2-6167-4721-A151-CDC08497B5A7	'--	Primary Tumor	1	'--	released	'--	'--	'--	Not Reported	'--	'--	'--
TCGA-THCA	039bfc94-fadd-440a-aade-a1595128583e	TCGA-J8-A3O2	4a3d3a72-e739-4ad9-85ce-f3ee56dc6753	TCGA-J8-A3O2-10A	'--	'--	'--	'--	'--	89	'--	'--	'--	'--	'--	'--	'--	'--	FALSE	'--	'--	false	'--	'--	'--	Blood Derived Normal	10	'--	released	'--	'--	'--	Not Reported	'--	'--	'--
TCGA-THCA	039bfc94-fadd-440a-aade-a1595128583e	TCGA-J8-A3O2	da6671f0-2042-40b5-b3b3-54d23f739781	TCGA-J8-A3O2-01Z	'--	'--	'--	'--	'--	'--	0	'--	'--	'--	'--	'--	'--	'--	TRUE	'--	'--	No	'--	'--	FFPE	Primary Tumor	1	'--	released	'--	'--	'--	Not Reported	'--	'--	'--
TCGA-THCA	039bfc94-fadd-440a-aade-a1595128583e	TCGA-J8-A3O2	cb50f540-96d7-4599-aa07-89a6b5090672	TCGA-J8-A3O2-06A	'--	'--	'--	'--	'--	223	'--	'--	'--	'--	'--	'--	70.0	'--	FALSE	'--	'--	true	'--	FCD2C9C3-B6BA-4D51-B6BC-B7773BE7CD39	'--	Metastatic	6	'--	released	'--	'--	'--	Not Reported	'--	'--	'--
TCGA-THCA	a3765a2b-ff09-4dec-b990-65529345214e	TCGA-DJ-A3UX	1393952d-9322-45dc-bc61-2d3efe58625e	TCGA-DJ-A3UX-01Z	'--	'--	'--	'--	'--	'--	0	'--	'--	'--	'--	'--	'--	'--	TRUE	'--	'--	No	'--	'--	FFPE	Primary Tumor	1	'--	released	'--	'--	'--	Not Reported	'--	'--	'--
TCGA-THCA	a3765a2b-ff09-4dec-b990-65529345214e	TCGA-DJ-A3UX	da672213-5b05-4a9a-8846-71cc5fc1dea0	TCGA-DJ-A3UX-01A	'--	'--	'--	'--	'--	568	'--	'--	'--	'--	'--	'--	20.0	'--	FALSE	'--	'--	true	'--	8791C9F6-CB05-47BE-900F-76A896823EC2	'--	Primary Tumor	1	'--	released	'--	'--	'--	Not Reported	'--	'--	'--
TCGA-THCA	a3765a2b-ff09-4dec-b990-65529345214e	TCGA-DJ-A3UX	4df3e700-0a0f-4a24-88c6-10fc45f5ea3d	TCGA-DJ-A3UX-10A	'--	'--	'--	'--	'--	568	'--	'--	'--	'--	'--	'--	'--	'--	FALSE	'--	'--	false	'--	'--	'--	Blood Derived Normal	10	'--	released	'--	'--	'--	Not Reported	'--	'--	'--
TCGA-THCA	745642a0-ddba-495b-bafc-da085552758a	TCGA-EL-A3CU	7a9ca8d7-bac0-40c2-9646-7042126b9e25	TCGA-EL-A3CU-10A	'--	'--	'--	'--	'--	4278	'--	'--	'--	'--	'--	'--	'--	'--	FALSE	'--	'--	false	'--	'--	'--	Blood Derived Normal	10	'--	released	'--	'--	'--	Not Reported	'--	'--	'--
TCGA-THCA	745642a0-ddba-495b-bafc-da085552758a	TCGA-EL-A3CU	f500e1cc-5f76-4b13-8e11-2cfbf014c5bc	TCGA-EL-A3CU-01Z	'--	'--	'--	'--	'--	'--	0	'--	'--	'--	'--	'--	'--	'--	TRUE	'--	'--	No	'--	'--	FFPE	Primary Tumor	1	'--	released	'--	'--	'--	Not Reported	'--	'--	'--
TCGA-THCA	745642a0-ddba-495b-bafc-da085552758a	TCGA-EL-A3CU	472d7e5c-8de9-435d-87a4-7882961ad7f4	TCGA-EL-A3CU-01A	'--	'--	'--	'--	'--	4278	'--	'--	'--	'--	'--	'--	240.0	'--	FALSE	'--	'--	true	'--	2ED57CDC-E420-4895-A5A9-F62480DBBE1E	'--	Primary Tumor	1	'--	released	'--	'--	'--	Not Reported	'--	'--	'--
TCGA-THCA	86657a3c-10cf-48b7-9fda-f2df5e2afad5	TCGA-DE-A4M9	5e5829eb-5c1e-4b6b-a37c-eb2f6340f6fb	TCGA-DE-A4M9-01A	'--	'--	'--	'--	'--	43	'--	'--	'--	'--	'--	'--	200.0	'--	FALSE	'--	'--	false	'--	B3CF4E37-3430-4092-BC7D-5E5534DCE531	'--	Primary Tumor	1	'--	released	'--	'--	'--	Not Reported	'--	'--	'--
TCGA-THCA	86657a3c-10cf-48b7-9fda-f2df5e2afad5	TCGA-DE-A4M9	6ceb001d-4140-4bde-a100-e908f349aea6	TCGA-DE-A4M9-10A	'--	'--	'--	'--	'--	43	'--	'--	'--	'--	'--	'--	'--	'--	FALSE	'--	'--	false	'--	'--	'--	Blood Derived Normal	10	'--	released	'--	'--	'--	Not Reported	'--	'--	'--
TCGA-THCA	86657a3c-10cf-48b7-9fda-f2df5e2afad5	TCGA-DE-A4M9	7e845c3b-9044-403d-8e61-cdb16064938b	TCGA-DE-A4M9-01Z	'--	'--	'--	'--	'--	'--	0	'--	'--	'--	'--	'--	'--	'--	TRUE	'--	'--	No	'--	'--	FFPE	Primary Tumor	1	'--	released	'--	'--	'--	Not Reported	'--	'--	'--
TCGA-THCA	59cd0969-a798-4d19-95ed-a311f39d2f38	TCGA-EM-A3FN	3eb36454-1e48-4fa9-80cc-8feba522a82d	TCGA-EM-A3FN-01Z	'--	'--	'--	'--	'--	'--	0	'--	'--	'--	'--	'--	'--	'--	TRUE	'--	'--	No	'--	'--	FFPE	Primary Tumor	1	'--	released	'--	'--	'--	Not Reported	'--	'--	'--
TCGA-THCA	59cd0969-a798-4d19-95ed-a311f39d2f38	TCGA-EM-A3FN	7fc42d2c-5dc2-4a71-a7cc-595b99b13081	TCGA-EM-A3FN-10A	'--	'--	'--	'--	'--	297	'--	'--	'--	'--	'--	'--	'--	'--	FALSE	'--	'--	false	'--	'--	'--	Blood Derived Normal	10	'--	released	'--	'--	'--	Not Reported	'--	'--	'--
TCGA-THCA	59cd0969-a798-4d19-95ed-a311f39d2f38	TCGA-EM-A3FN	63130e8f-11de-44bc-8b2c-a8ea2613c3a5	TCGA-EM-A3FN-01A	'--	'--	'--	'--	'--	234	'--	'--	'--	'--	'--	'--	90.0	'--	FALSE	'--	'--	false	'--	CA2DF1AC-137B-4A68-BAF5-66B16138F412	'--	Primary Tumor	1	'--	released	'--	'--	'--	Not Reported	'--	'--	'--
TCGA-THCA	fc70a652-7925-4759-8e1f-05fd56829df4	TCGA-FE-A239	5b9c2b55-2742-486d-a114-e493480c498e	TCGA-FE-A239-01Z	'--	'--	'--	'--	'--	'--	0	'--	'--	'--	'--	'--	'--	'--	TRUE	'--	'--	No	'--	'--	FFPE	Primary Tumor	1	'--	released	'--	'--	'--	Not Reported	'--	'--	'--
TCGA-THCA	fc70a652-7925-4759-8e1f-05fd56829df4	TCGA-FE-A239	e44bab87-dab4-4c6e-b6e3-51b8641ed67e	TCGA-FE-A239-01A	'--	'--	'--	'--	'--	2039	'--	'--	'--	'--	'--	'--	110.0	'--	FALSE	'--	'--	true	'--	E0EADBBD-4454-4BF8-A0FF-3E08C3634324	'--	Primary Tumor	1	'--	released	'--	'--	'--	Not Reported	'--	'--	'--
TCGA-THCA	fc70a652-7925-4759-8e1f-05fd56829df4	TCGA-FE-A239	ebf80878-24d2-453c-ab5c-49dd34de96a1	TCGA-FE-A239-10A	'--	'--	'--	'--	'--	2051	'--	'--	'--	'--	'--	'--	'--	'--	FALSE	'--	'--	false	'--	'--	'--	Blood Derived Normal	10	'--	released	'--	'--	'--	Not Reported	'--	'--	'--
TCGA-THCA	5832c002-e5a4-45bc-b8f9-dbb841fd22f3	TCGA-J8-A3O0	bdd239ba-dbc5-4f30-ad5d-8159c67e7597	TCGA-J8-A3O0-01A	'--	'--	'--	'--	'--	874	'--	'--	'--	'--	'--	'--	150.0	'--	FALSE	'--	'--	true	'--	33E08AA4-5DD6-4C54-89C1-5EC2C548800F	'--	Primary Tumor	1	'--	released	'--	'--	'--	Not Reported	'--	'--	'--
TCGA-THCA	5832c002-e5a4-45bc-b8f9-dbb841fd22f3	TCGA-J8-A3O0	0369c987-7022-4842-b4c9-e59d9024d4bb	TCGA-J8-A3O0-01Z	'--	'--	'--	'--	'--	'--	0	'--	'--	'--	'--	'--	'--	'--	TRUE	'--	'--	No	'--	'--	FFPE	Primary Tumor	1	'--	released	'--	'--	'--	Not Reported	'--	'--	'--
TCGA-THCA	5832c002-e5a4-45bc-b8f9-dbb841fd22f3	TCGA-J8-A3O0	fbe5a109-c1b9-47bd-ab46-6581f72a2e99	TCGA-J8-A3O0-10A	'--	'--	'--	'--	'--	874	'--	'--	'--	'--	'--	'--	'--	'--	FALSE	'--	'--	false	'--	'--	'--	Blood Derived Normal	10	'--	released	'--	'--	'--	Not Reported	'--	'--	'--
TCGA-THCA	ef3dd880-7be4-46a8-93c2-7cba1a9cd24d	TCGA-EL-A3MW	1c40e0af-d029-4447-9c75-51e45de8b9b0	TCGA-EL-A3MW-01A	'--	'--	'--	'--	'--	3067	'--	'--	'--	'--	'--	'--	250.0	'--	FALSE	'--	'--	false	'--	FCDCD4CD-0F6C-457D-A670-E7FFB4ED3495	'--	Primary Tumor	1	'--	released	'--	'--	'--	Not Reported	'--	'--	'--
TCGA-THCA	ef3dd880-7be4-46a8-93c2-7cba1a9cd24d	TCGA-EL-A3MW	5c8bcfef-6ee8-425b-817b-00d7c49f2add	TCGA-EL-A3MW-01Z	'--	'--	'--	'--	'--	'--	0	'--	'--	'--	'--	'--	'--	'--	TRUE	'--	'--	No	'--	'--	FFPE	Primary Tumor	1	'--	released	'--	'--	'--	Not Reported	'--	'--	'--
TCGA-THCA	ef3dd880-7be4-46a8-93c2-7cba1a9cd24d	TCGA-EL-A3MW	deb4f007-978c-4bfb-a149-1fbc5005772f	TCGA-EL-A3MW-11A	'--	'--	'--	'--	'--	3067	'--	'--	'--	'--	'--	'--	240.0	'--	FALSE	'--	'--	false	'--	'--	'--	Solid Tissue Normal	11	'--	released	'--	'--	'--	Not Reported	'--	'--	'--
TCGA-THCA	3a211d5a-085f-4902-86b6-50e4eb36b897	TCGA-EM-A3O7	d66318ba-d9a0-4825-86fa-6ac403212254	TCGA-EM-A3O7-10A	'--	'--	'--	'--	'--	181	'--	'--	'--	'--	'--	'--	'--	'--	FALSE	'--	'--	false	'--	'--	'--	Blood Derived Normal	10	'--	released	'--	'--	'--	Not Reported	'--	'--	'--
TCGA-THCA	3a211d5a-085f-4902-86b6-50e4eb36b897	TCGA-EM-A3O7	04bde6c4-6604-4391-a2ad-67ab6fe8e540	TCGA-EM-A3O7-01Z	'--	'--	'--	'--	'--	'--	0	'--	'--	'--	'--	'--	'--	'--	TRUE	'--	'--	No	'--	'--	FFPE	Primary Tumor	1	'--	released	'--	'--	'--	Not Reported	'--	'--	'--
TCGA-THCA	3a211d5a-085f-4902-86b6-50e4eb36b897	TCGA-EM-A3O7	362f0cc2-b884-404b-8df1-2bfc2a75e9c3	TCGA-EM-A3O7-01A	'--	'--	'--	'--	'--	112	'--	'--	'--	'--	'--	'--	80.0	'--	FALSE	'--	'--	false	'--	F408FB89-12A6-4698-8E4B-C64F353C334D	'--	Primary Tumor	1	'--	released	'--	'--	'--	Not Reported	'--	'--	'--
TCGA-THCA	c83fb5e6-8af3-47e4-ae48-cee92dff9db7	TCGA-ET-A3BS	1586f379-5acd-4779-8ed4-2afdba95cae7	TCGA-ET-A3BS-01Z	'--	'--	'--	'--	'--	'--	0	'--	'--	'--	'--	'--	'--	'--	TRUE	'--	'--	No	'--	'--	FFPE	Primary Tumor	1	'--	released	'--	'--	'--	Not Reported	'--	'--	'--
TCGA-THCA	c83fb5e6-8af3-47e4-ae48-cee92dff9db7	TCGA-ET-A3BS	26cb4536-c9f0-45d1-917b-957ae7558ed7	TCGA-ET-A3BS-10A	'--	'--	'--	'--	'--	316	'--	'--	'--	'--	'--	'--	'--	'--	FALSE	'--	'--	false	'--	'--	'--	Blood Derived Normal	10	'--	released	'--	'--	'--	Not Reported	'--	'--	'--
TCGA-THCA	c83fb5e6-8af3-47e4-ae48-cee92dff9db7	TCGA-ET-A3BS	882e6f53-ca5f-401f-bb95-361e5cde13ca	TCGA-ET-A3BS-01A	'--	'--	'--	'--	'--	316	'--	'--	'--	'--	'--	'--	260.0	'--	FALSE	'--	'--	true	'--	15B854F2-949F-497F-B47D-C4DC3E8D9693	'--	Primary Tumor	1	'--	released	'--	'--	'--	Not Reported	'--	'--	'--
TCGA-THCA	f9ceffc0-d544-418d-b4a9-bd3c84e37026	TCGA-BJ-A0Z2	b06b7493-f38a-493f-8b47-61e0fa4d111f	TCGA-BJ-A0Z2-01A	'--	'--	'--	'--	'--	169	'--	'--	'--	'--	'--	'--	430.0	'--	FALSE	'--	'--	true	'--	C93FF278-A750-44B7-8A22-7AC06BDFB799	'--	Primary Tumor	1	'--	released	'--	'--	'--	Not Reported	'--	'--	'--
TCGA-THCA	f9ceffc0-d544-418d-b4a9-bd3c84e37026	TCGA-BJ-A0Z2	f1387c0a-1b6b-4340-96d8-ace977792529	TCGA-BJ-A0Z2-01Z	'--	'--	'--	'--	'--	'--	0	'--	'--	'--	'--	'--	'--	'--	TRUE	'--	'--	No	'--	'--	FFPE	Primary Tumor	1	'--	released	'--	'--	'--	Not Reported	'--	'--	'--
TCGA-THCA	f9ceffc0-d544-418d-b4a9-bd3c84e37026	TCGA-BJ-A0Z2	bb9c69c4-22d7-4462-bc55-71341ea4d000	TCGA-BJ-A0Z2-10A	'--	'--	'--	'--	'--	169	'--	'--	'--	'--	'--	'--	'--	'--	FALSE	'--	'--	false	'--	'--	'--	Blood Derived Normal	10	'--	released	'--	'--	'--	Not Reported	'--	'--	'--
TCGA-THCA	a253b21e-ba9b-4928-95d1-89b59c868794	TCGA-EL-A3ZS	4923b08d-63a2-4143-94c2-c27cab20fbb2	TCGA-EL-A3ZS-01A	'--	'--	'--	'--	'--	1315	'--	'--	'--	'--	'--	'--	240.0	'--	FALSE	'--	'--	false	'--	28FCCF82-C2A7-462A-8590-E873CC86696A	'--	Primary Tumor	1	'--	released	'--	'--	'--	Not Reported	'--	'--	'--
TCGA-THCA	a253b21e-ba9b-4928-95d1-89b59c868794	TCGA-EL-A3ZS	959ef3d0-4c5e-45bb-ab76-7cc9e5a0836d	TCGA-EL-A3ZS-11A	'--	'--	'--	'--	'--	1315	'--	'--	'--	'--	'--	'--	280.0	'--	FALSE	'--	'--	false	'--	'--	'--	Solid Tissue Normal	11	'--	released	'--	'--	'--	Not Reported	'--	'--	'--
TCGA-THCA	a253b21e-ba9b-4928-95d1-89b59c868794	TCGA-EL-A3ZS	dfeef1fb-b270-45c9-a218-5eb7881a1edb	TCGA-EL-A3ZS-01Z	'--	'--	'--	'--	'--	'--	0	'--	'--	'--	'--	'--	'--	'--	TRUE	'--	'--	No	'--	'--	FFPE	Primary Tumor	1	'--	released	'--	'--	'--	Not Reported	'--	'--	'--
TCGA-THCA	c63936dd-39fd-41fa-a9f6-18b18303ef05	TCGA-EM-A22N	61bea381-4691-4487-a012-b5c0d9179179	TCGA-EM-A22N-10A	'--	'--	'--	'--	'--	134	'--	'--	'--	'--	'--	'--	'--	'--	FALSE	'--	'--	false	'--	'--	'--	Blood Derived Normal	10	'--	released	'--	'--	'--	Not Reported	'--	'--	'--
TCGA-THCA	c63936dd-39fd-41fa-a9f6-18b18303ef05	TCGA-EM-A22N	ae84b65f-d30e-4f3d-8195-2ae4af9dc8e8	TCGA-EM-A22N-01Z	'--	'--	'--	'--	'--	'--	0	'--	'--	'--	'--	'--	'--	'--	TRUE	'--	'--	No	'--	'--	FFPE	Primary Tumor	1	'--	released	'--	'--	'--	Not Reported	'--	'--	'--
TCGA-THCA	c63936dd-39fd-41fa-a9f6-18b18303ef05	TCGA-EM-A22N	ead007db-6cd8-44cf-bb5b-bea7b52448b2	TCGA-EM-A22N-01A	'--	'--	'--	'--	'--	50	'--	'--	'--	'--	'--	'--	80.0	'--	FALSE	'--	'--	false	'--	B3E28081-82CE-471C-BDC7-78EAB3613AFE	'--	Primary Tumor	1	'--	released	'--	'--	'--	Not Reported	'--	'--	'--
TCGA-THCA	b7bafe7f-295c-4598-9cc8-49d785bd2218	TCGA-EM-A4FF	83981538-b7fe-4104-b9a3-6e85a404af7c	TCGA-EM-A4FF-10A	'--	'--	'--	'--	'--	2135	'--	'--	'--	'--	'--	'--	'--	'--	FALSE	'--	'--	false	'--	'--	'--	Blood Derived Normal	10	'--	released	'--	'--	'--	Not Reported	'--	'--	'--
TCGA-THCA	b7bafe7f-295c-4598-9cc8-49d785bd2218	TCGA-EM-A4FF	487899c2-0e65-4ae4-a23a-08cf937d92ab	TCGA-EM-A4FF-01A	'--	'--	'--	'--	'--	2135	'--	'--	'--	'--	'--	'--	50.0	'--	FALSE	'--	'--	false	'--	013C1D9F-3602-413B-B211-31BE03C5C1D6	'--	Primary Tumor	1	'--	released	'--	'--	'--	Not Reported	'--	'--	'--
TCGA-THCA	b7bafe7f-295c-4598-9cc8-49d785bd2218	TCGA-EM-A4FF	44109a40-a2df-4b44-8a4c-f3d224044658	TCGA-EM-A4FF-01Z	'--	'--	'--	'--	'--	'--	0	'--	'--	'--	'--	'--	'--	'--	TRUE	'--	'--	No	'--	'--	FFPE	Primary Tumor	1	'--	released	'--	'--	'--	Not Reported	'--	'--	'--
TCGA-THCA	98a08015-9040-4e0b-bcfa-2c6db7d0f888	TCGA-EM-A2OX	9cce9655-6717-4339-b46c-6c0a484f9e24	TCGA-EM-A2OX-01Z	'--	'--	'--	'--	'--	'--	0	'--	'--	'--	'--	'--	'--	'--	TRUE	'--	'--	No	'--	'--	FFPE	Primary Tumor	1	'--	released	'--	'--	'--	Not Reported	'--	'--	'--
TCGA-THCA	98a08015-9040-4e0b-bcfa-2c6db7d0f888	TCGA-EM-A2OX	c332ce53-f002-4824-9718-5065c2c1af29	TCGA-EM-A2OX-01A	'--	'--	'--	'--	'--	140	'--	'--	'--	'--	'--	'--	60.0	'--	FALSE	'--	'--	false	'--	8BC70A7D-F4F4-4268-88DC-4F7A6B30D67A	'--	Primary Tumor	1	'--	released	'--	'--	'--	Not Reported	'--	'--	'--
TCGA-THCA	98a08015-9040-4e0b-bcfa-2c6db7d0f888	TCGA-EM-A2OX	4758e5e7-9cc0-4221-b317-b256c17d5d35	TCGA-EM-A2OX-10A	'--	'--	'--	'--	'--	232	'--	'--	'--	'--	'--	'--	'--	'--	FALSE	'--	'--	false	'--	'--	'--	Blood Derived Normal	10	'--	released	'--	'--	'--	Not Reported	'--	'--	'--
TCGA-THCA	0d497faf-2c1c-4173-a5fe-770cca73323c	TCGA-BJ-A18Z	fdf1e501-f34f-450c-9a5c-611157079a86	TCGA-BJ-A18Z-10A	'--	'--	'--	'--	'--	87	'--	'--	'--	'--	'--	'--	'--	'--	FALSE	'--	'--	false	'--	'--	'--	Blood Derived Normal	10	'--	released	'--	'--	'--	Not Reported	'--	'--	'--
TCGA-THCA	0d497faf-2c1c-4173-a5fe-770cca73323c	TCGA-BJ-A18Z	19dee039-9c98-4d4a-8baf-eea1b6dda8eb	TCGA-BJ-A18Z-01A	'--	'--	'--	'--	'--	87	'--	'--	'--	'--	'--	'--	300.0	'--	FALSE	'--	'--	true	'--	AE63E7FD-7E20-493C-B405-8D18C3DFBEA2	'--	Primary Tumor	1	'--	released	'--	'--	'--	Not Reported	'--	'--	'--
TCGA-THCA	0d497faf-2c1c-4173-a5fe-770cca73323c	TCGA-BJ-A18Z	22e679a5-b4b7-4202-8113-b54435a6c149	TCGA-BJ-A18Z-01Z	'--	'--	'--	'--	'--	'--	0	'--	'--	'--	'--	'--	'--	'--	TRUE	'--	'--	No	'--	'--	FFPE	Primary Tumor	1	'--	released	'--	'--	'--	Not Reported	'--	'--	'--
TCGA-THCA	8c5aef43-341e-4a37-84eb-fd730eb957c7	TCGA-DJ-A13U	cd19d6bb-21a4-409a-a7ba-a4521a03abd3	TCGA-DJ-A13U-01A	'--	'--	'--	'--	'--	276	'--	'--	'--	'--	'--	'--	50.0	'--	FALSE	'--	'--	true	'--	323C8F8C-9AFC-49D5-B5A2-B2543EB73A31	'--	Primary Tumor	1	'--	released	'--	'--	'--	Not Reported	'--	'--	'--
TCGA-THCA	8c5aef43-341e-4a37-84eb-fd730eb957c7	TCGA-DJ-A13U	544d494e-88f5-4b2e-8170-cd4595acd592	TCGA-DJ-A13U-10A	'--	'--	'--	'--	'--	276	'--	'--	'--	'--	'--	'--	'--	'--	FALSE	'--	'--	false	'--	'--	'--	Blood Derived Normal	10	'--	released	'--	'--	'--	Not Reported	'--	'--	'--
TCGA-THCA	8c5aef43-341e-4a37-84eb-fd730eb957c7	TCGA-DJ-A13U	7fa3df20-826c-4074-8e2b-47e083af66cd	TCGA-DJ-A13U-01Z	'--	'--	'--	'--	'--	'--	0	'--	'--	'--	'--	'--	'--	'--	TRUE	'--	'--	No	'--	'--	FFPE	Primary Tumor	1	'--	released	'--	'--	'--	Not Reported	'--	'--	'--
TCGA-THCA	6b529fb3-0b1b-4d3b-9309-bfcb063dbb71	TCGA-FY-A4B0	e6a84292-fe90-4be2-b135-1091d34274b7	TCGA-FY-A4B0-10A	'--	'--	'--	'--	'--	72	'--	'--	'--	'--	'--	'--	'--	'--	FALSE	'--	'--	false	'--	'--	'--	Blood Derived Normal	10	'--	released	'--	'--	'--	Not Reported	'--	'--	'--
TCGA-THCA	6b529fb3-0b1b-4d3b-9309-bfcb063dbb71	TCGA-FY-A4B0	79c918f2-f4b1-4617-a0f5-5e6a20de276c	TCGA-FY-A4B0-01Z	'--	'--	'--	'--	'--	'--	0	'--	'--	'--	'--	'--	'--	'--	TRUE	'--	'--	No	'--	'--	FFPE	Primary Tumor	1	'--	released	'--	'--	'--	Not Reported	'--	'--	'--
TCGA-THCA	6b529fb3-0b1b-4d3b-9309-bfcb063dbb71	TCGA-FY-A4B0	d0e73f50-d2b4-4130-b9e0-c585bb0c93a5	TCGA-FY-A4B0-01A	'--	'--	'--	'--	'--	72	'--	'--	'--	'--	'--	'--	90.0	'--	FALSE	'--	'--	false	'--	513126F2-4AAB-464F-89FB-84202C2853AC	'--	Primary Tumor	1	'--	released	'--	'--	'--	Not Reported	'--	'--	'--
TCGA-THCA	24cf6397-60ef-4635-81f0-78a67157aac0	TCGA-EM-A3OA	c5f5b32f-db69-4d4d-850e-b8e26c5c1e7f	TCGA-EM-A3OA-01Z	'--	'--	'--	'--	'--	'--	0	'--	'--	'--	'--	'--	'--	'--	TRUE	'--	'--	No	'--	'--	FFPE	Primary Tumor	1	'--	released	'--	'--	'--	Not Reported	'--	'--	'--
TCGA-THCA	24cf6397-60ef-4635-81f0-78a67157aac0	TCGA-EM-A3OA	cc8519d3-1d5a-4895-a850-e6c7662eda6d	TCGA-EM-A3OA-10A	'--	'--	'--	'--	'--	170	'--	'--	'--	'--	'--	'--	'--	'--	FALSE	'--	'--	false	'--	'--	'--	Blood Derived Normal	10	'--	released	'--	'--	'--	Not Reported	'--	'--	'--
TCGA-THCA	24cf6397-60ef-4635-81f0-78a67157aac0	TCGA-EM-A3OA	8b048263-6c2f-4bf6-8f37-c69da9f3839f	TCGA-EM-A3OA-01A	'--	'--	'--	'--	'--	101	'--	'--	'--	'--	'--	'--	80.0	'--	FALSE	'--	'--	false	'--	68C1C276-EB58-4A3C-8693-0A7229214A28	'--	Primary Tumor	1	'--	released	'--	'--	'--	Not Reported	'--	'--	'--
TCGA-THCA	c8d62754-1601-40c0-98ef-e5bb94306b92	TCGA-ET-A40S	412f40f1-2835-4912-8720-e47a3118653e	TCGA-ET-A40S-10A	'--	'--	'--	'--	'--	240	'--	'--	'--	'--	'--	'--	'--	'--	FALSE	'--	'--	false	'--	'--	'--	Blood Derived Normal	10	'--	released	'--	'--	'--	Not Reported	'--	'--	'--
TCGA-THCA	c8d62754-1601-40c0-98ef-e5bb94306b92	TCGA-ET-A40S	16b56a00-f37e-4008-961c-c2ac06e919a1	TCGA-ET-A40S-01Z	'--	'--	'--	'--	'--	'--	0	'--	'--	'--	'--	'--	'--	'--	TRUE	'--	'--	No	'--	'--	FFPE	Primary Tumor	1	'--	released	'--	'--	'--	Not Reported	'--	'--	'--
TCGA-THCA	c8d62754-1601-40c0-98ef-e5bb94306b92	TCGA-ET-A40S	2d7c3a2e-27d5-4851-9e5f-81e77ac2ac62	TCGA-ET-A40S-01A	'--	'--	'--	'--	'--	240	'--	'--	'--	'--	'--	'--	50.0	'--	FALSE	'--	'--	true	'--	82520D7D-DA01-4884-BFD9-1396B05E0C5A	'--	Primary Tumor	1	'--	released	'--	'--	'--	Not Reported	'--	'--	'--
TCGA-THCA	dd478399-d2ec-4ae4-a82a-b0258d24d088	TCGA-MK-A4N6	ade34f09-379d-463e-a9b1-c9c50e565afb	TCGA-MK-A4N6-01A	'--	'--	'--	'--	'--	589	'--	'--	'--	'--	'--	'--	80.0	'--	FALSE	'--	'--	true	'--	0532440D-F8D5-4A26-9A33-440775504978	'--	Primary Tumor	1	'--	released	'--	'--	'--	Not Reported	'--	'--	'--
TCGA-THCA	dd478399-d2ec-4ae4-a82a-b0258d24d088	TCGA-MK-A4N6	148c253d-9dd3-4791-b9b5-79844de822f9	TCGA-MK-A4N6-10A	'--	'--	'--	'--	'--	589	'--	'--	'--	'--	'--	'--	'--	'--	FALSE	'--	'--	false	'--	'--	'--	Blood Derived Normal	10	'--	released	'--	'--	'--	Not Reported	'--	'--	'--
TCGA-THCA	dd478399-d2ec-4ae4-a82a-b0258d24d088	TCGA-MK-A4N6	a038a9e4-30f0-40e9-a516-3783e57d4744	TCGA-MK-A4N6-01Z	'--	'--	'--	'--	'--	'--	0	'--	'--	'--	'--	'--	'--	'--	TRUE	'--	'--	No	'--	'--	FFPE	Primary Tumor	1	'--	released	'--	'--	'--	Not Reported	'--	'--	'--
TCGA-THCA	5a6b9340-acde-4d97-8836-20ae29732851	TCGA-ET-A3BQ	757a6d68-4a9f-4a7d-8ccc-6f7c32f7d615	TCGA-ET-A3BQ-10A	'--	'--	'--	'--	'--	1074	'--	'--	'--	'--	'--	'--	'--	'--	FALSE	'--	'--	false	'--	'--	'--	Blood Derived Normal	10	'--	released	'--	'--	'--	Not Reported	'--	'--	'--
TCGA-THCA	5a6b9340-acde-4d97-8836-20ae29732851	TCGA-ET-A3BQ	ada8729c-e37a-4f29-a32c-a8487bed4aa6	TCGA-ET-A3BQ-01B	'--	'--	'--	'--	'--	1094	'--	'--	'--	'--	'--	'--	60.0	'--	FALSE	'--	'--	true	'--	D00A2399-3F56-472B-9382-93651D6EFB0E	'--	Primary Tumor	1	'--	released	'--	'--	'--	Not Reported	'--	'--	'--
TCGA-THCA	5a6b9340-acde-4d97-8836-20ae29732851	TCGA-ET-A3BQ	aef9f314-0bc7-4d3b-8521-a9c5689797ad	TCGA-ET-A3BQ-01Z	'--	'--	'--	'--	'--	'--	0	'--	'--	'--	'--	'--	'--	'--	TRUE	'--	'--	No	'--	'--	FFPE	Primary Tumor	1	'--	released	'--	'--	'--	Not Reported	'--	'--	'--
TCGA-THCA	92e9f5e1-b597-451b-b6d5-fad9a77ba87a	TCGA-EM-A22M	57fcb3d4-132b-408c-8435-d103639a75e9	TCGA-EM-A22M-10A	'--	'--	'--	'--	'--	134	'--	'--	'--	'--	'--	'--	'--	'--	FALSE	'--	'--	false	'--	'--	'--	Blood Derived Normal	10	'--	released	'--	'--	'--	Not Reported	'--	'--	'--
TCGA-THCA	92e9f5e1-b597-451b-b6d5-fad9a77ba87a	TCGA-EM-A22M	6f356767-957a-41a7-a581-6f0791d5f06f	TCGA-EM-A22M-01A	'--	'--	'--	'--	'--	50	'--	'--	'--	'--	'--	'--	120.0	'--	FALSE	'--	'--	false	'--	013B2003-A884-40A0-8D85-8EE9D4DB960C	'--	Primary Tumor	1	'--	released	'--	'--	'--	Not Reported	'--	'--	'--
TCGA-THCA	92e9f5e1-b597-451b-b6d5-fad9a77ba87a	TCGA-EM-A22M	d8b5b1f2-a654-40ac-9ba3-aed3cfb2dc50	TCGA-EM-A22M-01Z	'--	'--	'--	'--	'--	'--	0	'--	'--	'--	'--	'--	'--	'--	TRUE	'--	'--	No	'--	'--	FFPE	Primary Tumor	1	'--	released	'--	'--	'--	Not Reported	'--	'--	'--
TCGA-THCA	934a58af-0ffc-487e-9e95-fa7643b7d5cb	TCGA-EL-A3CX	22ab448c-d596-42bb-82e8-926b2b4f1045	TCGA-EL-A3CX-01Z	'--	'--	'--	'--	'--	'--	0	'--	'--	'--	'--	'--	'--	'--	TRUE	'--	'--	No	'--	'--	FFPE	Primary Tumor	1	'--	released	'--	'--	'--	Not Reported	'--	'--	'--
TCGA-THCA	934a58af-0ffc-487e-9e95-fa7643b7d5cb	TCGA-EL-A3CX	c65b5941-3e1d-41c6-9458-cde70425e7c7	TCGA-EL-A3CX-01A	'--	'--	'--	'--	'--	2292	'--	'--	'--	'--	'--	'--	270.0	'--	FALSE	'--	'--	true	'--	DF9BD55E-DBE5-4644-B7AD-FEC3B77B2649	'--	Primary Tumor	1	'--	released	'--	'--	'--	Not Reported	'--	'--	'--
TCGA-THCA	934a58af-0ffc-487e-9e95-fa7643b7d5cb	TCGA-EL-A3CX	34dee671-dbaa-4d57-beff-4caebe8b0479	TCGA-EL-A3CX-10A	'--	'--	'--	'--	'--	2292	'--	'--	'--	'--	'--	'--	'--	'--	FALSE	'--	'--	false	'--	'--	'--	Blood Derived Normal	10	'--	released	'--	'--	'--	Not Reported	'--	'--	'--
TCGA-THCA	8023d4c9-b56d-417a-9a52-d45b59c756ed	TCGA-ET-A25M	0c601625-ed21-47e5-bc3d-a0057d6a148f	TCGA-ET-A25M-01A	'--	'--	'--	'--	'--	424	'--	'--	'--	'--	'--	'--	180.0	'--	FALSE	'--	'--	true	'--	9140CD19-069D-4F54-82C8-6823CE2C2914	'--	Primary Tumor	1	'--	released	'--	'--	'--	Not Reported	'--	'--	'--
TCGA-THCA	8023d4c9-b56d-417a-9a52-d45b59c756ed	TCGA-ET-A25M	5972c59c-3cd2-41d9-ae04-42dec3ecc565	TCGA-ET-A25M-10A	'--	'--	'--	'--	'--	424	'--	'--	'--	'--	'--	'--	'--	'--	FALSE	'--	'--	false	'--	'--	'--	Blood Derived Normal	10	'--	released	'--	'--	'--	Not Reported	'--	'--	'--
TCGA-THCA	8023d4c9-b56d-417a-9a52-d45b59c756ed	TCGA-ET-A25M	aa1ab330-3f69-4283-96c8-e8e5fda37637	TCGA-ET-A25M-01Z	'--	'--	'--	'--	'--	'--	0	'--	'--	'--	'--	'--	'--	'--	TRUE	'--	'--	No	'--	'--	FFPE	Primary Tumor	1	'--	released	'--	'--	'--	Not Reported	'--	'--	'--
TCGA-THCA	8ed1b900-a8a8-4164-b96b-f060f15d7075	TCGA-H2-A422	0ad53c03-4bed-411d-bfab-a17b82fb71bd	TCGA-H2-A422-01A	'--	'--	'--	'--	'--	14	'--	'--	'--	'--	'--	'--	90.0	'--	FALSE	'--	'--	false	'--	84172B64-F859-431E-A98A-23B7CDCB276E	'--	Primary Tumor	1	'--	released	'--	'--	'--	Not Reported	'--	'--	'--
TCGA-THCA	8ed1b900-a8a8-4164-b96b-f060f15d7075	TCGA-H2-A422	7f693392-a39e-4d08-9c0a-dc41cb919b93	TCGA-H2-A422-01Z	'--	'--	'--	'--	'--	'--	0	'--	'--	'--	'--	'--	'--	'--	TRUE	'--	'--	No	'--	'--	FFPE	Primary Tumor	1	'--	released	'--	'--	'--	Not Reported	'--	'--	'--
TCGA-THCA	8ed1b900-a8a8-4164-b96b-f060f15d7075	TCGA-H2-A422	5183786e-c6ee-4daa-8f99-6c98d0ace526	TCGA-H2-A422-10A	'--	'--	'--	'--	'--	14	'--	'--	'--	'--	'--	'--	'--	'--	FALSE	'--	'--	false	'--	'--	'--	Blood Derived Normal	10	'--	released	'--	'--	'--	Not Reported	'--	'--	'--
TCGA-THCA	dc5c1a76-30de-4b30-b397-3ad691c92a86	TCGA-EL-A4KG	f2a82d52-3782-40a2-944e-5a0348e12d0b	TCGA-EL-A4KG-01Z	'--	'--	'--	'--	'--	'--	0	'--	'--	'--	'--	'--	'--	'--	TRUE	'--	'--	No	'--	'--	FFPE	Primary Tumor	1	'--	released	'--	'--	'--	Not Reported	'--	'--	'--
TCGA-THCA	dc5c1a76-30de-4b30-b397-3ad691c92a86	TCGA-EL-A4KG	69cf12fa-e1e0-449c-b8f9-bd418813f951	TCGA-EL-A4KG-10A	'--	'--	'--	'--	'--	260	'--	'--	'--	'--	'--	'--	'--	'--	FALSE	'--	'--	false	'--	'--	'--	Blood Derived Normal	10	'--	released	'--	'--	'--	Not Reported	'--	'--	'--
TCGA-THCA	dc5c1a76-30de-4b30-b397-3ad691c92a86	TCGA-EL-A4KG	0f2ad5d1-fe8f-4555-80d9-f4155cf9b653	TCGA-EL-A4KG-01A	'--	'--	'--	'--	'--	260	'--	'--	'--	'--	'--	'--	190.0	'--	FALSE	'--	'--	false	'--	8B4D292E-EF9B-4457-91EE-754DD5E112E5	'--	Primary Tumor	1	'--	released	'--	'--	'--	Not Reported	'--	'--	'--
TCGA-THCA	d3e75fb4-fb7c-4ebf-9c75-2be9ffd9f52d	TCGA-EM-A2OY	966d1c08-73da-44cd-b6aa-42056d59a7cf	TCGA-EM-A2OY-01A	'--	'--	'--	'--	'--	150	'--	'--	'--	'--	'--	'--	90.0	'--	FALSE	'--	'--	false	'--	9962DA33-6B07-4433-A4BC-777B4E5942A0	'--	Primary Tumor	1	'--	released	'--	'--	'--	Not Reported	'--	'--	'--
TCGA-THCA	d3e75fb4-fb7c-4ebf-9c75-2be9ffd9f52d	TCGA-EM-A2OY	5794f6d9-d370-4d3a-9bf9-615e73ddf9af	TCGA-EM-A2OY-10A	'--	'--	'--	'--	'--	242	'--	'--	'--	'--	'--	'--	'--	'--	FALSE	'--	'--	false	'--	'--	'--	Blood Derived Normal	10	'--	released	'--	'--	'--	Not Reported	'--	'--	'--
TCGA-THCA	d3e75fb4-fb7c-4ebf-9c75-2be9ffd9f52d	TCGA-EM-A2OY	a14734bf-03fc-40c9-b537-5fe162482fb2	TCGA-EM-A2OY-01Z	'--	'--	'--	'--	'--	'--	0	'--	'--	'--	'--	'--	'--	'--	TRUE	'--	'--	No	'--	'--	FFPE	Primary Tumor	1	'--	released	'--	'--	'--	Not Reported	'--	'--	'--
TCGA-THCA	cac8246a-a806-4945-898a-105cd88b2752	TCGA-DJ-A3VL	dfe93ac9-2320-42ac-a308-384a04c0ec6d	TCGA-DJ-A3VL-01A	'--	'--	'--	'--	'--	401	'--	'--	'--	'--	'--	'--	40.0	'--	FALSE	'--	'--	true	'--	B84A9460-C19C-4AAC-8C08-1631C2DA08DE	'--	Primary Tumor	1	'--	released	'--	'--	'--	Not Reported	'--	'--	'--
TCGA-THCA	cac8246a-a806-4945-898a-105cd88b2752	TCGA-DJ-A3VL	674eecbd-3072-449b-aff8-73e04feb9258	TCGA-DJ-A3VL-01Z	'--	'--	'--	'--	'--	'--	0	'--	'--	'--	'--	'--	'--	'--	TRUE	'--	'--	No	'--	'--	FFPE	Primary Tumor	1	'--	released	'--	'--	'--	Not Reported	'--	'--	'--
TCGA-THCA	cac8246a-a806-4945-898a-105cd88b2752	TCGA-DJ-A3VL	a7e41e35-7638-4e48-8af7-63b701f873f5	TCGA-DJ-A3VL-10A	'--	'--	'--	'--	'--	401	'--	'--	'--	'--	'--	'--	'--	'--	FALSE	'--	'--	false	'--	'--	'--	Blood Derived Normal	10	'--	released	'--	'--	'--	Not Reported	'--	'--	'--
TCGA-THCA	286de8cd-7222-4f85-a370-79a7903edf45	TCGA-EM-A2CL	d999b0c6-d746-4e70-9b37-e38ff2c8037b	TCGA-EM-A2CL-01Z	'--	'--	'--	'--	'--	'--	0	'--	'--	'--	'--	'--	'--	'--	TRUE	'--	'--	No	'--	'--	FFPE	Primary Tumor	1	'--	released	'--	'--	'--	Not Reported	'--	'--	'--
TCGA-THCA	286de8cd-7222-4f85-a370-79a7903edf45	TCGA-EM-A2CL	9abcb417-b73e-45a3-931d-272b0e5d6a75	TCGA-EM-A2CL-10A	'--	'--	'--	'--	'--	254	'--	'--	'--	'--	'--	'--	'--	'--	FALSE	'--	'--	false	'--	'--	'--	Blood Derived Normal	10	'--	released	'--	'--	'--	Not Reported	'--	'--	'--
TCGA-THCA	286de8cd-7222-4f85-a370-79a7903edf45	TCGA-EM-A2CL	ed984f05-7fd9-4231-9d5c-002abc29cb64	TCGA-EM-A2CL-01A	'--	'--	'--	'--	'--	164	'--	'--	'--	'--	'--	'--	100.0	'--	FALSE	'--	'--	false	'--	2C563AAE-210A-40FB-9FB3-23FCD79E9D19	'--	Primary Tumor	1	'--	released	'--	'--	'--	Not Reported	'--	'--	'--
TCGA-THCA	04ae6b65-8514-47fa-b573-ec1e067ff116	TCGA-EM-A2CO	0be02cc0-debc-4e19-8b3d-28601c1ea569	TCGA-EM-A2CO-10A	'--	'--	'--	'--	'--	222	'--	'--	'--	'--	'--	'--	'--	'--	FALSE	'--	'--	false	'--	'--	'--	Blood Derived Normal	10	'--	released	'--	'--	'--	Not Reported	'--	'--	'--
TCGA-THCA	04ae6b65-8514-47fa-b573-ec1e067ff116	TCGA-EM-A2CO	8c3c215e-da32-4e42-96d3-a2c6d246a7ee	TCGA-EM-A2CO-01A	'--	'--	'--	'--	'--	132	'--	'--	'--	'--	'--	'--	150.0	'--	FALSE	'--	'--	false	'--	AAD6A295-FE0C-46FF-A9C2-D2A75EE02AFA	'--	Primary Tumor	1	'--	released	'--	'--	'--	Not Reported	'--	'--	'--
TCGA-THCA	04ae6b65-8514-47fa-b573-ec1e067ff116	TCGA-EM-A2CO	cc2290f8-70fc-4c9e-8551-2a8201fdcc64	TCGA-EM-A2CO-01Z	'--	'--	'--	'--	'--	'--	0	'--	'--	'--	'--	'--	'--	'--	TRUE	'--	'--	No	'--	'--	FFPE	Primary Tumor	1	'--	released	'--	'--	'--	Not Reported	'--	'--	'--
TCGA-THCA	cbab7a72-11f7-4dfe-80f8-1b1ef1cf0055	TCGA-BJ-A2N7	8f189f9c-8e78-47cf-87d1-22347a6c41e1	TCGA-BJ-A2N7-01Z	'--	'--	'--	'--	'--	'--	0	'--	'--	'--	'--	'--	'--	'--	TRUE	'--	'--	No	'--	'--	FFPE	Primary Tumor	1	'--	released	'--	'--	'--	Not Reported	'--	'--	'--
TCGA-THCA	cbab7a72-11f7-4dfe-80f8-1b1ef1cf0055	TCGA-BJ-A2N7	419983e8-94f8-43b0-803d-0bb811d1fdf7	TCGA-BJ-A2N7-01A	'--	'--	'--	'--	'--	141	'--	'--	'--	'--	'--	'--	100.0	'--	FALSE	'--	'--	true	'--	F11C36D8-A39E-4CF2-8914-35B5164070F9	'--	Primary Tumor	1	'--	released	'--	'--	'--	Not Reported	'--	'--	'--
TCGA-THCA	cbab7a72-11f7-4dfe-80f8-1b1ef1cf0055	TCGA-BJ-A2N7	54f8cef4-ccfd-4315-9b86-f98321bde207	TCGA-BJ-A2N7-11A	'--	'--	'--	'--	'--	141	'--	'--	'--	'--	'--	'--	120.0	'--	FALSE	'--	'--	true	'--	'--	'--	Solid Tissue Normal	11	'--	released	'--	'--	'--	Not Reported	'--	'--	'--
TCGA-THCA	cbab7a72-11f7-4dfe-80f8-1b1ef1cf0055	TCGA-BJ-A2N7	9a675c2d-72c1-4cc0-8f26-11880a5630a0	TCGA-BJ-A2N7-10A	'--	'--	'--	'--	'--	141	'--	'--	'--	'--	'--	'--	'--	'--	FALSE	'--	'--	false	'--	'--	'--	Blood Derived Normal	10	'--	released	'--	'--	'--	Not Reported	'--	'--	'--
TCGA-THCA	6b85d76d-6098-47ea-9823-586238526cf1	TCGA-BJ-A45J	f649b7ba-eb06-4481-bd6a-b04100216f64	TCGA-BJ-A45J-10A	'--	'--	'--	'--	'--	154	'--	'--	'--	'--	'--	'--	'--	'--	FALSE	'--	'--	false	'--	'--	'--	Blood Derived Normal	10	'--	released	'--	'--	'--	Not Reported	'--	'--	'--
TCGA-THCA	6b85d76d-6098-47ea-9823-586238526cf1	TCGA-BJ-A45J	e98dc4dc-30d3-4240-84cc-1118d60d161d	TCGA-BJ-A45J-01A	'--	'--	'--	'--	'--	154	'--	'--	'--	'--	'--	'--	160.0	'--	FALSE	'--	'--	true	'--	FF588CC0-F345-403A-AE69-97F8F3F27274	'--	Primary Tumor	1	'--	released	'--	'--	'--	Not Reported	'--	'--	'--
TCGA-THCA	6b85d76d-6098-47ea-9823-586238526cf1	TCGA-BJ-A45J	047652d0-0055-4349-9c46-5aae1378a0e3	TCGA-BJ-A45J-01Z	'--	'--	'--	'--	'--	'--	0	'--	'--	'--	'--	'--	'--	'--	TRUE	'--	'--	No	'--	'--	FFPE	Primary Tumor	1	'--	released	'--	'--	'--	Not Reported	'--	'--	'--
TCGA-THCA	6b85d76d-6098-47ea-9823-586238526cf1	TCGA-BJ-A45J	a600ecff-62c9-42b5-847c-4ce827c9f9eb	TCGA-BJ-A45J-11A	'--	'--	'--	'--	'--	154	'--	'--	'--	'--	'--	'--	170.0	'--	FALSE	'--	'--	true	'--	'--	'--	Solid Tissue Normal	11	'--	released	'--	'--	'--	Not Reported	'--	'--	'--
TCGA-THCA	4c513413-263e-4c7b-b997-7b688c47b698	TCGA-BJ-A0ZA	a61a9ec7-b893-44a5-ab6f-a390c168be88	TCGA-BJ-A0ZA-01A	'--	'--	'--	'--	'--	174	'--	'--	'--	'--	'--	'--	320.0	'--	FALSE	'--	'--	true	'--	01ABC869-F3BE-4420-AB0D-D766DBE5CE71	'--	Primary Tumor	1	'--	released	'--	'--	'--	Not Reported	'--	'--	'--
TCGA-THCA	4c513413-263e-4c7b-b997-7b688c47b698	TCGA-BJ-A0ZA	aeabab22-f653-463f-bf82-b3459cd97d9b	TCGA-BJ-A0ZA-01Z	'--	'--	'--	'--	'--	'--	0	'--	'--	'--	'--	'--	'--	'--	TRUE	'--	'--	No	'--	'--	FFPE	Primary Tumor	1	'--	released	'--	'--	'--	Not Reported	'--	'--	'--
TCGA-THCA	4c513413-263e-4c7b-b997-7b688c47b698	TCGA-BJ-A0ZA	ead7a19a-af58-4b53-8091-a52c2221a4a9	TCGA-BJ-A0ZA-10A	'--	'--	'--	'--	'--	174	'--	'--	'--	'--	'--	'--	'--	'--	FALSE	'--	'--	false	'--	'--	'--	Blood Derived Normal	10	'--	released	'--	'--	'--	Not Reported	'--	'--	'--
TCGA-THCA	9b6acc25-447d-4144-b4c0-ef52b8850d96	TCGA-EM-A2P1	d9ea6bd3-9e2f-4b44-a88b-05179dce5a18	TCGA-EM-A2P1-01A	'--	'--	'--	'--	'--	84	'--	'--	'--	'--	'--	'--	90.0	'--	FALSE	'--	'--	false	'--	9B10FFED-BCE2-4DDB-AD28-E8FB9708DB1A	'--	Primary Tumor	1	'--	released	'--	'--	'--	Not Reported	'--	'--	'--
TCGA-THCA	9b6acc25-447d-4144-b4c0-ef52b8850d96	TCGA-EM-A2P1	2ea5307e-d32d-4c19-ab1b-35a10c4f5b5c	TCGA-EM-A2P1-01Z	'--	'--	'--	'--	'--	'--	0	'--	'--	'--	'--	'--	'--	'--	TRUE	'--	'--	No	'--	'--	FFPE	Primary Tumor	1	'--	released	'--	'--	'--	Not Reported	'--	'--	'--
TCGA-THCA	9b6acc25-447d-4144-b4c0-ef52b8850d96	TCGA-EM-A2P1	b519701a-f366-4682-8936-6c5e135fad4c	TCGA-EM-A2P1-06A	'--	'--	'--	'--	'--	84	'--	'--	'--	'--	'--	'--	70.0	'--	FALSE	'--	'--	false	'--	793EF89D-75B5-43C3-B567-766836B52676	'--	Metastatic	6	'--	released	'--	'--	'--	Not Reported	'--	'--	'--
TCGA-THCA	9b6acc25-447d-4144-b4c0-ef52b8850d96	TCGA-EM-A2P1	79b025ce-2acd-4c67-899f-855ae4f0b0c4	TCGA-EM-A2P1-10A	'--	'--	'--	'--	'--	176	'--	'--	'--	'--	'--	'--	'--	'--	FALSE	'--	'--	false	'--	'--	'--	Blood Derived Normal	10	'--	released	'--	'--	'--	Not Reported	'--	'--	'--
TCGA-THCA	f854ce67-c586-4424-a674-2dd67ad0ed7f	TCGA-EM-A4FN	b2034510-c71a-4a8a-8a51-38373b0a87cf	TCGA-EM-A4FN-01Z	'--	'--	'--	'--	'--	'--	0	'--	'--	'--	'--	'--	'--	'--	TRUE	'--	'--	No	'--	'--	FFPE	Primary Tumor	1	'--	released	'--	'--	'--	Not Reported	'--	'--	'--
TCGA-THCA	f854ce67-c586-4424-a674-2dd67ad0ed7f	TCGA-EM-A4FN	551d0a51-c755-43ef-acf7-88b598f06c9b	TCGA-EM-A4FN-01A	'--	'--	'--	'--	'--	241	'--	'--	'--	'--	'--	'--	80.0	'--	FALSE	'--	'--	false	'--	45A213AB-38E7-4D7F-8E38-5CC140570891	'--	Primary Tumor	1	'--	released	'--	'--	'--	Not Reported	'--	'--	'--
TCGA-THCA	f854ce67-c586-4424-a674-2dd67ad0ed7f	TCGA-EM-A4FN	985926f0-52b2-4b67-95d6-a8cb0d9fb42b	TCGA-EM-A4FN-10A	'--	'--	'--	'--	'--	241	'--	'--	'--	'--	'--	'--	'--	'--	FALSE	'--	'--	false	'--	'--	'--	Blood Derived Normal	10	'--	released	'--	'--	'--	Not Reported	'--	'--	'--
TCGA-THCA	a552e8ab-9dec-44ea-9f02-7ca704ee8467	TCGA-E8-A44K	8cae9cd1-53d9-4cdd-ad08-2d34ea4e7ce3	TCGA-E8-A44K-10A	'--	'--	'--	'--	'--	98	'--	'--	'--	'--	'--	'--	'--	'--	FALSE	'--	'--	false	'--	'--	'--	Blood Derived Normal	10	'--	released	'--	'--	'--	Not Reported	'--	'--	'--
TCGA-THCA	a552e8ab-9dec-44ea-9f02-7ca704ee8467	TCGA-E8-A44K	a6aa14e9-82fd-4f40-81b8-f55d16ea9065	TCGA-E8-A44K-01A	'--	'--	'--	'--	'--	98	'--	'--	'--	'--	'--	'--	450.0	'--	FALSE	'--	'--	true	'--	65882DB3-606B-4C8C-9B7B-67D996F982C4	'--	Primary Tumor	1	'--	released	'--	'--	'--	Not Reported	'--	'--	'--
TCGA-THCA	a552e8ab-9dec-44ea-9f02-7ca704ee8467	TCGA-E8-A44K	8d78c36c-a21a-4137-8ad8-a356088733ae	TCGA-E8-A44K-01Z	'--	'--	'--	'--	'--	'--	0	'--	'--	'--	'--	'--	'--	'--	TRUE	'--	'--	No	'--	'--	FFPE	Primary Tumor	1	'--	released	'--	'--	'--	Not Reported	'--	'--	'--
TCGA-THCA	e1c8af06-9ea4-4062-9264-aa916e0025d1	TCGA-4C-A93U	e0c297f8-c279-4a19-97fd-b60613dd979a	TCGA-4C-A93U-01Z	'--	'--	'--	'--	'--	'--	0	'--	'--	'--	'--	'--	'--	'--	TRUE	'--	'--	No	'--	'--	FFPE	Primary Tumor	1	'--	released	'--	'--	'--	Not Reported	'--	'--	'--
TCGA-THCA	e1c8af06-9ea4-4062-9264-aa916e0025d1	TCGA-4C-A93U	a5b168e1-a5e3-48d3-9c7b-006750c34d97	TCGA-4C-A93U-01A	'--	'--	'--	'--	'--	75	'--	'--	'--	'--	'--	'--	800.0	'--	FALSE	'--	'--	true	'--	52F5D12B-92C9-4A98-A9EB-42BF48C0BA87	'--	Primary Tumor	1	'--	released	'--	'--	'--	Not Reported	'--	'--	'--
TCGA-THCA	e1c8af06-9ea4-4062-9264-aa916e0025d1	TCGA-4C-A93U	dfed272f-4e39-4f13-9d3e-da1cd90fac09	TCGA-4C-A93U-10A	'--	'--	'--	'--	'--	75	'--	'--	'--	'--	'--	'--	'--	'--	FALSE	'--	'--	false	'--	'--	'--	Blood Derived Normal	10	'--	released	'--	'--	'--	Not Reported	'--	'--	'--
TCGA-THCA	f3ee888e-5116-4313-a2f6-3b1dcc3e4bc1	TCGA-BJ-A0YZ	f07142d5-f504-4760-b5cc-f58c6d93ef0a	TCGA-BJ-A0YZ-01A	'--	'--	'--	'--	'--	334	'--	'--	'--	'--	'--	'--	380.0	'--	FALSE	'--	'--	true	'--	B4B35251-8130-41C6-A7DB-478D8673D12C	'--	Primary Tumor	1	'--	released	'--	'--	'--	Not Reported	'--	'--	'--
TCGA-THCA	f3ee888e-5116-4313-a2f6-3b1dcc3e4bc1	TCGA-BJ-A0YZ	ab9ff843-5265-459f-bd2d-edb04d5b76df	TCGA-BJ-A0YZ-01Z	'--	'--	'--	'--	'--	'--	0	'--	'--	'--	'--	'--	'--	'--	TRUE	'--	'--	No	'--	'--	FFPE	Primary Tumor	1	'--	released	'--	'--	'--	Not Reported	'--	'--	'--
TCGA-THCA	f3ee888e-5116-4313-a2f6-3b1dcc3e4bc1	TCGA-BJ-A0YZ	6b074c68-a266-420f-b6b7-c29d28493920	TCGA-BJ-A0YZ-10A	'--	'--	'--	'--	'--	334	'--	'--	'--	'--	'--	'--	'--	'--	FALSE	'--	'--	false	'--	'--	'--	Blood Derived Normal	10	'--	released	'--	'--	'--	Not Reported	'--	'--	'--
TCGA-THCA	d4c68c1c-a3f3-4e0c-b555-d457378a1d24	TCGA-BJ-A291	d1612961-a709-487b-a4d1-ce42f0b9aa54	TCGA-BJ-A291-01A	'--	'--	'--	'--	'--	380	'--	'--	'--	'--	'--	'--	150.0	'--	FALSE	'--	'--	true	'--	71C89B49-FA32-4831-9E62-7228751405F1	'--	Primary Tumor	1	'--	released	'--	'--	'--	Not Reported	'--	'--	'--
TCGA-THCA	d4c68c1c-a3f3-4e0c-b555-d457378a1d24	TCGA-BJ-A291	8051f3c6-7c36-45d1-b403-032983da863f	TCGA-BJ-A291-10A	'--	'--	'--	'--	'--	380	'--	'--	'--	'--	'--	'--	'--	'--	FALSE	'--	'--	false	'--	'--	'--	Blood Derived Normal	10	'--	released	'--	'--	'--	Not Reported	'--	'--	'--
TCGA-THCA	d4c68c1c-a3f3-4e0c-b555-d457378a1d24	TCGA-BJ-A291	33a99d00-e8c1-4a2f-9257-7cc3a5939347	TCGA-BJ-A291-01Z	'--	'--	'--	'--	'--	'--	0	'--	'--	'--	'--	'--	'--	'--	TRUE	'--	'--	No	'--	'--	FFPE	Primary Tumor	1	'--	released	'--	'--	'--	Not Reported	'--	'--	'--
TCGA-THCA	f9db9757-04d8-40bd-a58d-605f4255b0e6	TCGA-KS-A4I3	336fde82-0ac7-4953-99ea-7fb078ec264e	TCGA-KS-A4I3-01A	'--	'--	'--	'--	'--	413	'--	'--	'--	'--	'--	'--	60.0	'--	FALSE	'--	'--	false	'--	4948BB01-8F03-4124-9D83-DF98967F7B58	'--	Primary Tumor	1	'--	released	'--	'--	'--	Not Reported	'--	'--	'--
TCGA-THCA	f9db9757-04d8-40bd-a58d-605f4255b0e6	TCGA-KS-A4I3	f441963e-a855-4e74-a4f0-57c630d2b570	TCGA-KS-A4I3-11A	'--	'--	'--	'--	'--	413	'--	'--	'--	'--	'--	'--	90.0	'--	FALSE	'--	'--	false	'--	'--	'--	Solid Tissue Normal	11	'--	released	'--	'--	'--	Not Reported	'--	'--	'--
TCGA-THCA	f9db9757-04d8-40bd-a58d-605f4255b0e6	TCGA-KS-A4I3	19f017da-0cac-4823-96a1-d49654abe477	TCGA-KS-A4I3-01Z	'--	'--	'--	'--	'--	'--	0	'--	'--	'--	'--	'--	'--	'--	TRUE	'--	'--	No	'--	'--	FFPE	Primary Tumor	1	'--	released	'--	'--	'--	Not Reported	'--	'--	'--
TCGA-THCA	96b95a2c-fb4f-4cba-89e7-a7f0e90db146	TCGA-EL-A3ZR	22d5e7de-d90c-47e0-bd25-ba214562117a	TCGA-EL-A3ZR-11A	'--	'--	'--	'--	'--	1332	'--	'--	'--	'--	'--	'--	230.0	'--	FALSE	'--	'--	false	'--	'--	'--	Solid Tissue Normal	11	'--	released	'--	'--	'--	Not Reported	'--	'--	'--
TCGA-THCA	96b95a2c-fb4f-4cba-89e7-a7f0e90db146	TCGA-EL-A3ZR	6ce2f367-4f07-444c-9826-6f135c8a5c3b	TCGA-EL-A3ZR-01A	'--	'--	'--	'--	'--	1332	'--	'--	'--	'--	'--	'--	240.0	'--	FALSE	'--	'--	false	'--	AC8F850D-6F04-42C9-AA22-2532944E8C6F	'--	Primary Tumor	1	'--	released	'--	'--	'--	Not Reported	'--	'--	'--
TCGA-THCA	96b95a2c-fb4f-4cba-89e7-a7f0e90db146	TCGA-EL-A3ZR	f9bff531-9842-481d-9fdd-4b610a3b51e9	TCGA-EL-A3ZR-01Z	'--	'--	'--	'--	'--	'--	0	'--	'--	'--	'--	'--	'--	'--	TRUE	'--	'--	No	'--	'--	FFPE	Primary Tumor	1	'--	released	'--	'--	'--	Not Reported	'--	'--	'--
TCGA-THCA	104b6629-aff4-411b-9704-547c47ada5a1	TCGA-EM-A3SZ	5f9770ca-9f68-4773-8659-4b58b716fb9b	TCGA-EM-A3SZ-01Z	'--	'--	'--	'--	'--	'--	0	'--	'--	'--	'--	'--	'--	'--	TRUE	'--	'--	No	'--	'--	FFPE	Primary Tumor	1	'--	released	'--	'--	'--	Not Reported	'--	'--	'--
TCGA-THCA	104b6629-aff4-411b-9704-547c47ada5a1	TCGA-EM-A3SZ	b9e86511-3cbb-4dc5-a980-0c759ebff6b7	TCGA-EM-A3SZ-10A	'--	'--	'--	'--	'--	186	'--	'--	'--	'--	'--	'--	'--	'--	FALSE	'--	'--	false	'--	'--	'--	Blood Derived Normal	10	'--	released	'--	'--	'--	Not Reported	'--	'--	'--
TCGA-THCA	104b6629-aff4-411b-9704-547c47ada5a1	TCGA-EM-A3SZ	24a47998-87b1-4677-a50f-96a5184c9f5e	TCGA-EM-A3SZ-01A	'--	'--	'--	'--	'--	129	'--	'--	'--	'--	'--	'--	120.0	'--	FALSE	'--	'--	false	'--	EB2DC574-B401-44C0-9C5A-A9353A5ABF75	'--	Primary Tumor	1	'--	released	'--	'--	'--	Not Reported	'--	'--	'--
TCGA-THCA	44465a32-8ee9-4575-94b8-0200ba7c5bd4	TCGA-ET-A39P	c20c4e53-b6bd-49e7-b1c0-30f6458ebbeb	TCGA-ET-A39P-01Z	'--	'--	'--	'--	'--	'--	0	'--	'--	'--	'--	'--	'--	'--	TRUE	'--	'--	No	'--	'--	FFPE	Primary Tumor	1	'--	released	'--	'--	'--	Not Reported	'--	'--	'--
TCGA-THCA	44465a32-8ee9-4575-94b8-0200ba7c5bd4	TCGA-ET-A39P	8aed91d8-9428-4322-977b-939e9777c817	TCGA-ET-A39P-01A	'--	'--	'--	'--	'--	1617	'--	'--	'--	'--	'--	'--	490.0	'--	FALSE	'--	'--	true	'--	B37A8A96-8B16-45CD-BDC9-57C00FE33F65	'--	Primary Tumor	1	'--	released	'--	'--	'--	Not Reported	'--	'--	'--
TCGA-THCA	44465a32-8ee9-4575-94b8-0200ba7c5bd4	TCGA-ET-A39P	9376b698-3056-446e-b1f9-5a63c1c35535	TCGA-ET-A39P-10A	'--	'--	'--	'--	'--	1617	'--	'--	'--	'--	'--	'--	'--	'--	FALSE	'--	'--	false	'--	'--	'--	Blood Derived Normal	10	'--	released	'--	'--	'--	Not Reported	'--	'--	'--
TCGA-THCA	22eb9f00-6869-4d8f-b657-dfd64f81e9e9	TCGA-EM-A1CW	66990135-f339-4195-855b-a95ab74b4fe4	TCGA-EM-A1CW-11A	'--	'--	'--	'--	'--	249	'--	'--	'--	'--	'--	'--	120.0	'--	FALSE	'--	'--	false	'--	'--	'--	Solid Tissue Normal	11	'--	released	'--	'--	'--	Not Reported	'--	'--	'--
TCGA-THCA	22eb9f00-6869-4d8f-b657-dfd64f81e9e9	TCGA-EM-A1CW	f4c14a19-949f-410c-9fc9-d81cbba2d0b7	TCGA-EM-A1CW-10A	'--	'--	'--	'--	'--	249	'--	'--	'--	'--	'--	'--	'--	'--	FALSE	'--	'--	false	'--	'--	'--	Blood Derived Normal	10	'--	released	'--	'--	'--	Not Reported	'--	'--	'--
TCGA-THCA	22eb9f00-6869-4d8f-b657-dfd64f81e9e9	TCGA-EM-A1CW	40a9e5ad-69f7-4fb2-aaec-5016f19ff12e	TCGA-EM-A1CW-01Z	'--	'--	'--	'--	'--	'--	0	'--	'--	'--	'--	'--	'--	'--	TRUE	'--	'--	No	'--	'--	FFPE	Primary Tumor	1	'--	released	'--	'--	'--	Not Reported	'--	'--	'--
TCGA-THCA	22eb9f00-6869-4d8f-b657-dfd64f81e9e9	TCGA-EM-A1CW	7045f3e1-5239-4159-9b38-31e4168853d0	TCGA-EM-A1CW-01A	'--	'--	'--	'--	'--	249	'--	'--	'--	'--	'--	'--	140.0	'--	FALSE	'--	'--	false	'--	7A55B23F-2F3D-4748-9ACD-A947452F787C	'--	Primary Tumor	1	'--	released	'--	'--	'--	Not Reported	'--	'--	'--
TCGA-THCA	fd3315da-c870-4ad0-9d2a-50b1647d3e46	TCGA-J8-A4HW	85efb050-1c61-41be-a473-665ffe5744ca	TCGA-J8-A4HW-10A	'--	'--	'--	'--	'--	31	'--	'--	'--	'--	'--	'--	'--	'--	FALSE	'--	'--	false	'--	'--	'--	Blood Derived Normal	10	'--	released	'--	'--	'--	Not Reported	'--	'--	'--
TCGA-THCA	fd3315da-c870-4ad0-9d2a-50b1647d3e46	TCGA-J8-A4HW	77bd46ea-d5fc-47cd-a206-8cd6eb417fcb	TCGA-J8-A4HW-06A	'--	'--	'--	'--	'--	31	'--	'--	'--	'--	'--	'--	80.0	'--	FALSE	'--	'--	true	'--	44129C44-89D0-4967-92DE-8E8E2082519A	'--	Metastatic	6	'--	released	'--	'--	'--	Not Reported	'--	'--	'--
TCGA-THCA	fd3315da-c870-4ad0-9d2a-50b1647d3e46	TCGA-J8-A4HW	2e958c2d-1120-487e-9249-765357b78db8	TCGA-J8-A4HW-01Z	'--	'--	'--	'--	'--	'--	0	'--	'--	'--	'--	'--	'--	'--	TRUE	'--	'--	No	'--	'--	FFPE	Primary Tumor	1	'--	released	'--	'--	'--	Not Reported	'--	'--	'--
TCGA-THCA	fd3315da-c870-4ad0-9d2a-50b1647d3e46	TCGA-J8-A4HW	e094f387-b719-4de7-b667-30e9f382024b	TCGA-J8-A4HW-01A	'--	'--	'--	'--	'--	31	'--	'--	'--	'--	'--	'--	80.0	'--	FALSE	'--	'--	true	'--	ED54F8D6-9C90-492F-8DFA-D46D3EE338B0	'--	Primary Tumor	1	'--	released	'--	'--	'--	Not Reported	'--	'--	'--
TCGA-THCA	899ed323-4fd1-4d8d-9c2f-c63d9b44e875	TCGA-KS-A4ID	c2be2a8d-3a3e-48d7-8f4f-79bf85371b14	TCGA-KS-A4ID-01A	'--	'--	'--	'--	'--	702	'--	'--	'--	'--	'--	'--	50.0	'--	FALSE	'--	'--	false	'--	2F1434B2-A474-41D3-A93D-C6DD9A946080	'--	Primary Tumor	1	'--	released	'--	'--	'--	Not Reported	'--	'--	'--
TCGA-THCA	899ed323-4fd1-4d8d-9c2f-c63d9b44e875	TCGA-KS-A4ID	1e41cb2b-0b08-497d-a478-f51069656d46	TCGA-KS-A4ID-11A	'--	'--	'--	'--	'--	702	'--	'--	'--	'--	'--	'--	90.0	'--	FALSE	'--	'--	false	'--	'--	'--	Solid Tissue Normal	11	'--	released	'--	'--	'--	Not Reported	'--	'--	'--
TCGA-THCA	899ed323-4fd1-4d8d-9c2f-c63d9b44e875	TCGA-KS-A4ID	c5803654-9ede-4dce-9dea-a301e2537fa8	TCGA-KS-A4ID-01Z	'--	'--	'--	'--	'--	'--	0	'--	'--	'--	'--	'--	'--	'--	TRUE	'--	'--	No	'--	'--	FFPE	Primary Tumor	1	'--	released	'--	'--	'--	Not Reported	'--	'--	'--
TCGA-THCA	b597023c-ff84-44cc-bfcc-8bee64ca4cff	TCGA-DJ-A2QB	54d2d029-19b9-49d3-a039-7461e8a0cfdb	TCGA-DJ-A2QB-01Z	'--	'--	'--	'--	'--	'--	0	'--	'--	'--	'--	'--	'--	'--	TRUE	'--	'--	No	'--	'--	FFPE	Primary Tumor	1	'--	released	'--	'--	'--	Not Reported	'--	'--	'--
TCGA-THCA	b597023c-ff84-44cc-bfcc-8bee64ca4cff	TCGA-DJ-A2QB	47fd7219-81a8-4b04-9943-df38e1772b92	TCGA-DJ-A2QB-10A	'--	'--	'--	'--	'--	148	'--	'--	'--	'--	'--	'--	'--	'--	FALSE	'--	'--	false	'--	'--	'--	Blood Derived Normal	10	'--	released	'--	'--	'--	Not Reported	'--	'--	'--
TCGA-THCA	b597023c-ff84-44cc-bfcc-8bee64ca4cff	TCGA-DJ-A2QB	1bc248b6-2082-422f-bd1a-029c0461dcd1	TCGA-DJ-A2QB-01A	'--	'--	'--	'--	'--	148	'--	'--	'--	'--	'--	'--	240.0	'--	FALSE	'--	'--	true	'--	8F4F74F6-4B01-4F2D-9927-12F1A23A3501	'--	Primary Tumor	1	'--	released	'--	'--	'--	Not Reported	'--	'--	'--
TCGA-THCA	105210cc-6fe3-4615-a582-475553e14272	TCGA-EM-A3AP	927fff20-afdb-4866-a7fe-b335a1f1fb55	TCGA-EM-A3AP-10A	'--	'--	'--	'--	'--	199	'--	'--	'--	'--	'--	'--	'--	'--	FALSE	'--	'--	false	'--	'--	'--	Blood Derived Normal	10	'--	released	'--	'--	'--	Not Reported	'--	'--	'--
TCGA-THCA	105210cc-6fe3-4615-a582-475553e14272	TCGA-EM-A3AP	c0d3de46-5fb1-4d2d-bf47-4e8e569801a2	TCGA-EM-A3AP-01Z	'--	'--	'--	'--	'--	'--	0	'--	'--	'--	'--	'--	'--	'--	TRUE	'--	'--	No	'--	'--	FFPE	Primary Tumor	1	'--	released	'--	'--	'--	Not Reported	'--	'--	'--
TCGA-THCA	105210cc-6fe3-4615-a582-475553e14272	TCGA-EM-A3AP	840861bf-7f0d-4d08-8e44-770bd71521e9	TCGA-EM-A3AP-01A	'--	'--	'--	'--	'--	142	'--	'--	'--	'--	'--	'--	120.0	'--	FALSE	'--	'--	false	'--	10520066-D640-420F-B717-24B60B3F7465	'--	Primary Tumor	1	'--	released	'--	'--	'--	Not Reported	'--	'--	'--
TCGA-THCA	e9ccf355-e68a-489c-a914-31b766bd0aef	TCGA-EL-A3D5	0a554a68-536f-4d07-8ba4-44498d384333	TCGA-EL-A3D5-01Z	'--	'--	'--	'--	'--	'--	0	'--	'--	'--	'--	'--	'--	'--	TRUE	'--	'--	No	'--	'--	FFPE	Primary Tumor	1	'--	released	'--	'--	'--	Not Reported	'--	'--	'--
TCGA-THCA	e9ccf355-e68a-489c-a914-31b766bd0aef	TCGA-EL-A3D5	3660630c-a128-48d8-881d-7645c021f97a	TCGA-EL-A3D5-10A	'--	'--	'--	'--	'--	626	'--	'--	'--	'--	'--	'--	'--	'--	FALSE	'--	'--	false	'--	'--	'--	Blood Derived Normal	10	'--	released	'--	'--	'--	Not Reported	'--	'--	'--
TCGA-THCA	e9ccf355-e68a-489c-a914-31b766bd0aef	TCGA-EL-A3D5	fda77112-5c61-4d6b-ab2b-13ef7f567d18	TCGA-EL-A3D5-01A	'--	'--	'--	'--	'--	626	'--	'--	'--	'--	'--	'--	210.0	'--	FALSE	'--	'--	true	'--	D52D36F3-9D5A-4176-8146-76A6AA4B8148	'--	Primary Tumor	1	'--	released	'--	'--	'--	Not Reported	'--	'--	'--
TCGA-THCA	4729410a-7240-4ed0-b478-78cc6c7a4810	TCGA-EM-A4FH	007d77d2-3006-4fa9-8def-e81d99e390f9	TCGA-EM-A4FH-10A	'--	'--	'--	'--	'--	353	'--	'--	'--	'--	'--	'--	'--	'--	FALSE	'--	'--	false	'--	'--	'--	Blood Derived Normal	10	'--	released	'--	'--	'--	Not Reported	'--	'--	'--
TCGA-THCA	4729410a-7240-4ed0-b478-78cc6c7a4810	TCGA-EM-A4FH	a11056f6-d3d4-45da-9832-7b0ea5141612	TCGA-EM-A4FH-01A	'--	'--	'--	'--	'--	353	'--	'--	'--	'--	'--	'--	90.0	'--	FALSE	'--	'--	false	'--	2D5F749F-4D86-4CDE-9EA2-2FB4E3C894AC	'--	Primary Tumor	1	'--	released	'--	'--	'--	Not Reported	'--	'--	'--
TCGA-THCA	4729410a-7240-4ed0-b478-78cc6c7a4810	TCGA-EM-A4FH	c45227f9-d2f0-4e0c-8308-c116bc5ae02a	TCGA-EM-A4FH-01Z	'--	'--	'--	'--	'--	'--	0	'--	'--	'--	'--	'--	'--	'--	TRUE	'--	'--	No	'--	'--	FFPE	Primary Tumor	1	'--	released	'--	'--	'--	Not Reported	'--	'--	'--
TCGA-THCA	8aa99f35-c644-4f91-9eff-a5d3fae758b0	TCGA-DJ-A13S	3b9574d5-c302-4d3c-b8c7-81a2229df761	TCGA-DJ-A13S-01Z	'--	'--	'--	'--	'--	'--	0	'--	'--	'--	'--	'--	'--	'--	TRUE	'--	'--	No	'--	'--	FFPE	Primary Tumor	1	'--	released	'--	'--	'--	Not Reported	'--	'--	'--
TCGA-THCA	8aa99f35-c644-4f91-9eff-a5d3fae758b0	TCGA-DJ-A13S	17952842-3447-4a38-90f4-d25b90c3233a	TCGA-DJ-A13S-01A	'--	'--	'--	'--	'--	161	'--	'--	'--	'--	'--	'--	320.0	'--	FALSE	'--	'--	true	'--	5568CCD4-25F8-4C94-93FC-17B1E8BF050A	'--	Primary Tumor	1	'--	released	'--	'--	'--	Not Reported	'--	'--	'--
TCGA-THCA	8aa99f35-c644-4f91-9eff-a5d3fae758b0	TCGA-DJ-A13S	932eb8e5-feaf-4c8c-8037-2d4d3b56d677	TCGA-DJ-A13S-10A	'--	'--	'--	'--	'--	161	'--	'--	'--	'--	'--	'--	'--	'--	FALSE	'--	'--	false	'--	'--	'--	Blood Derived Normal	10	'--	released	'--	'--	'--	Not Reported	'--	'--	'--
TCGA-THCA	744df1f5-a7d5-4675-92ce-6e4713f0d541	TCGA-FY-A40M	a9ed2f3b-29ca-42d7-9649-ee1f42844ca6	TCGA-FY-A40M-01Z	'--	'--	'--	'--	'--	'--	0	'--	'--	'--	'--	'--	'--	'--	TRUE	'--	'--	No	'--	'--	FFPE	Primary Tumor	1	'--	released	'--	'--	'--	Not Reported	'--	'--	'--
TCGA-THCA	744df1f5-a7d5-4675-92ce-6e4713f0d541	TCGA-FY-A40M	78cfadf9-ca3a-4909-b629-5654466cfa1b	TCGA-FY-A40M-01A	'--	'--	'--	'--	'--	70	'--	'--	'--	'--	'--	'--	160.0	'--	FALSE	'--	'--	false	'--	868F9544-F5A4-43EC-9031-6F701E82E6FE	'--	Primary Tumor	1	'--	released	'--	'--	'--	Not Reported	'--	'--	'--
TCGA-THCA	744df1f5-a7d5-4675-92ce-6e4713f0d541	TCGA-FY-A40M	5e7fd34b-998f-4ae1-a928-6499e6c11d42	TCGA-FY-A40M-10A	'--	'--	'--	'--	'--	70	'--	'--	'--	'--	'--	'--	'--	'--	FALSE	'--	'--	false	'--	'--	'--	Blood Derived Normal	10	'--	released	'--	'--	'--	Not Reported	'--	'--	'--
TCGA-THCA	861f94ce-45ff-4588-addb-e1ea48878c2e	TCGA-EL-A3T0	c603deff-fe10-4be5-99d7-182a290201d3	TCGA-EL-A3T0-11A	'--	'--	'--	'--	'--	3923	'--	'--	'--	'--	'--	'--	220.0	'--	FALSE	'--	'--	true	'--	'--	'--	Solid Tissue Normal	11	'--	released	'--	'--	'--	Not Reported	'--	'--	'--
TCGA-THCA	861f94ce-45ff-4588-addb-e1ea48878c2e	TCGA-EL-A3T0	32fd4a1d-7574-4e09-bc0b-531f7f55d186	TCGA-EL-A3T0-01Z	'--	'--	'--	'--	'--	'--	0	'--	'--	'--	'--	'--	'--	'--	TRUE	'--	'--	No	'--	'--	FFPE	Primary Tumor	1	'--	released	'--	'--	'--	Not Reported	'--	'--	'--
TCGA-THCA	861f94ce-45ff-4588-addb-e1ea48878c2e	TCGA-EL-A3T0	913d384c-657a-4ae0-9e8e-e9bdb77d140e	TCGA-EL-A3T0-01A	'--	'--	'--	'--	'--	3923	'--	'--	'--	'--	'--	'--	240.0	'--	FALSE	'--	'--	true	'--	A003614A-E610-4B31-BD3B-6A9B3141E7DB	'--	Primary Tumor	1	'--	released	'--	'--	'--	Not Reported	'--	'--	'--
TCGA-THCA	3d8b7654-b403-4360-80dc-8273ca90c2dc	TCGA-EL-A3ZK	89e45bcd-af6b-4785-9a75-5322576a69f4	TCGA-EL-A3ZK-01Z	'--	'--	'--	'--	'--	'--	0	'--	'--	'--	'--	'--	'--	'--	TRUE	'--	'--	No	'--	'--	FFPE	Primary Tumor	1	'--	released	'--	'--	'--	Not Reported	'--	'--	'--
TCGA-THCA	3d8b7654-b403-4360-80dc-8273ca90c2dc	TCGA-EL-A3ZK	b64ca6e7-adf3-4b32-9a33-a20beca40b9e	TCGA-EL-A3ZK-01A	'--	'--	'--	'--	'--	1646	'--	'--	'--	'--	'--	'--	230.0	'--	FALSE	'--	'--	false	'--	1C5F1577-8BE5-470A-8E27-E3CA45200F3A	'--	Primary Tumor	1	'--	released	'--	'--	'--	Not Reported	'--	'--	'--
TCGA-THCA	3d8b7654-b403-4360-80dc-8273ca90c2dc	TCGA-EL-A3ZK	3443f0b8-e826-4f25-84d9-ded19925ebc4	TCGA-EL-A3ZK-11A	'--	'--	'--	'--	'--	1646	'--	'--	'--	'--	'--	'--	190.0	'--	FALSE	'--	'--	false	'--	'--	'--	Solid Tissue Normal	11	'--	released	'--	'--	'--	Not Reported	'--	'--	'--
TCGA-THCA	8a02f305-6fd8-4908-bc19-06babf028b5b	TCGA-ET-A3BX	86b57ef1-dda6-4281-8528-6a49db3bd162	TCGA-ET-A3BX-10A	'--	'--	'--	'--	'--	328	'--	'--	'--	'--	'--	'--	'--	'--	FALSE	'--	'--	false	'--	'--	'--	Blood Derived Normal	10	'--	released	'--	'--	'--	Not Reported	'--	'--	'--
TCGA-THCA	8a02f305-6fd8-4908-bc19-06babf028b5b	TCGA-ET-A3BX	7a756ce5-c46a-47e9-b18b-3b0fc471366c	TCGA-ET-A3BX-01A	'--	'--	'--	'--	'--	328	'--	'--	'--	'--	'--	'--	410.0	'--	FALSE	'--	'--	true	'--	D97547B9-7C17-432E-850A-1BB3456F74B1	'--	Primary Tumor	1	'--	released	'--	'--	'--	Not Reported	'--	'--	'--
TCGA-THCA	8a02f305-6fd8-4908-bc19-06babf028b5b	TCGA-ET-A3BX	9e4d27f4-a7df-4cb1-8ccd-6db2ea0d8c9c	TCGA-ET-A3BX-01Z	'--	'--	'--	'--	'--	'--	0	'--	'--	'--	'--	'--	'--	'--	TRUE	'--	'--	No	'--	'--	FFPE	Primary Tumor	1	'--	released	'--	'--	'--	Not Reported	'--	'--	'--
TCGA-THCA	dd981e11-4b49-447e-8ebc-d9db4b55ce9b	TCGA-EL-A3GP	ce4a4849-8c3b-4b98-9af1-c9105445e316	TCGA-EL-A3GP-10A	'--	'--	'--	'--	'--	940	'--	'--	'--	'--	'--	'--	'--	'--	FALSE	'--	'--	false	'--	'--	'--	Blood Derived Normal	10	'--	released	'--	'--	'--	Not Reported	'--	'--	'--
TCGA-THCA	dd981e11-4b49-447e-8ebc-d9db4b55ce9b	TCGA-EL-A3GP	cdd2763f-2f60-4daa-aecf-e9a9dc27360d	TCGA-EL-A3GP-01A	'--	'--	'--	'--	'--	940	'--	'--	'--	'--	'--	'--	190.0	'--	FALSE	'--	'--	false	'--	20DDD60D-D110-4CED-9956-3DA810CDFA61	'--	Primary Tumor	1	'--	released	'--	'--	'--	Not Reported	'--	'--	'--
TCGA-THCA	dd981e11-4b49-447e-8ebc-d9db4b55ce9b	TCGA-EL-A3GP	a1dc9149-0f0a-40d8-a7fb-77a2418fcc39	TCGA-EL-A3GP-01Z	'--	'--	'--	'--	'--	'--	0	'--	'--	'--	'--	'--	'--	'--	TRUE	'--	'--	No	'--	'--	FFPE	Primary Tumor	1	'--	released	'--	'--	'--	Not Reported	'--	'--	'--
TCGA-THCA	4aed5116-d27b-4911-b310-05c2248b861f	TCGA-EM-A2CN	1580addd-2378-4ca5-a1e6-d6c02c1ec053	TCGA-EM-A2CN-10B	'--	'--	'--	'--	'--	288	'--	'--	'--	'--	'--	'--	'--	'--	FALSE	'--	'--	false	'--	'--	'--	Blood Derived Normal	10	'--	released	'--	'--	'--	Not Reported	'--	'--	'--
TCGA-THCA	4aed5116-d27b-4911-b310-05c2248b861f	TCGA-EM-A2CN	35a5330e-45c6-4ff9-ad98-059618ba39b8	TCGA-EM-A2CN-01Z	'--	'--	'--	'--	'--	'--	0	'--	'--	'--	'--	'--	'--	'--	TRUE	'--	'--	No	'--	'--	FFPE	Primary Tumor	1	'--	released	'--	'--	'--	Not Reported	'--	'--	'--
TCGA-THCA	4aed5116-d27b-4911-b310-05c2248b861f	TCGA-EM-A2CN	4548d9ee-668f-495b-845f-8b9fc798ea38	TCGA-EM-A2CN-01A	'--	'--	'--	'--	'--	163	'--	'--	'--	'--	'--	'--	100.0	'--	FALSE	'--	'--	false	'--	C8B2F186-9AD3-4F1B-BD3A-7122A0571B96	'--	Primary Tumor	1	'--	released	'--	'--	'--	Not Reported	'--	'--	'--
TCGA-THCA	cd73c807-a74e-46a8-9855-92de33da9b0d	TCGA-ET-A39L	766050c8-6e04-48d2-8867-0898fb517285	TCGA-ET-A39L-10A	'--	'--	'--	'--	'--	2018	'--	'--	'--	'--	'--	'--	'--	'--	FALSE	'--	'--	false	'--	'--	'--	Blood Derived Normal	10	'--	released	'--	'--	'--	Not Reported	'--	'--	'--
TCGA-THCA	cd73c807-a74e-46a8-9855-92de33da9b0d	TCGA-ET-A39L	5dc78784-fa9e-4415-812a-8d2c537dc15f	TCGA-ET-A39L-01A	'--	'--	'--	'--	'--	2018	'--	'--	'--	'--	'--	'--	100.0	'--	FALSE	'--	'--	true	'--	C284BB2D-209D-42BD-9DDC-DD5C152BE2CE	'--	Primary Tumor	1	'--	released	'--	'--	'--	Not Reported	'--	'--	'--
TCGA-THCA	cd73c807-a74e-46a8-9855-92de33da9b0d	TCGA-ET-A39L	97aa8622-b178-4a13-84cb-01e723c07284	TCGA-ET-A39L-01Z	'--	'--	'--	'--	'--	'--	0	'--	'--	'--	'--	'--	'--	'--	TRUE	'--	'--	No	'--	'--	FFPE	Primary Tumor	1	'--	released	'--	'--	'--	Not Reported	'--	'--	'--
TCGA-THCA	cc84500c-0196-450d-87a1-ca394cc227b5	TCGA-BJ-A4O9	72a05186-7575-4d52-a81a-5b036a71611d	TCGA-BJ-A4O9-01A	'--	'--	'--	'--	'--	209	'--	'--	'--	'--	'--	'--	100.0	'--	FALSE	'--	'--	true	'--	526938F6-37F3-4B78-AFE5-301AED24EADA	'--	Primary Tumor	1	'--	released	'--	'--	'--	Not Reported	'--	'--	'--
TCGA-THCA	cc84500c-0196-450d-87a1-ca394cc227b5	TCGA-BJ-A4O9	c30f65ed-1e29-4dce-a61e-32b1421c0905	TCGA-BJ-A4O9-01Z	'--	'--	'--	'--	'--	'--	0	'--	'--	'--	'--	'--	'--	'--	TRUE	'--	'--	No	'--	'--	FFPE	Primary Tumor	1	'--	released	'--	'--	'--	Not Reported	'--	'--	'--
TCGA-THCA	cc84500c-0196-450d-87a1-ca394cc227b5	TCGA-BJ-A4O9	be1a9bec-163d-4d97-8008-efd899db8e34	TCGA-BJ-A4O9-11A	'--	'--	'--	'--	'--	209	'--	'--	'--	'--	'--	'--	60.0	'--	FALSE	'--	'--	true	'--	'--	'--	Solid Tissue Normal	11	'--	released	'--	'--	'--	Not Reported	'--	'--	'--
TCGA-THCA	cc84500c-0196-450d-87a1-ca394cc227b5	TCGA-BJ-A4O9	2c119641-a150-4289-b08c-1172d883f562	TCGA-BJ-A4O9-10A	'--	'--	'--	'--	'--	209	'--	'--	'--	'--	'--	'--	'--	'--	FALSE	'--	'--	false	'--	'--	'--	Blood Derived Normal	10	'--	released	'--	'--	'--	Not Reported	'--	'--	'--
TCGA-THCA	dc4d8468-6f34-40cb-a826-8d582cd86fde	TCGA-BJ-A0ZB	c2f1f7a8-2633-4166-95ab-501fb192af39	TCGA-BJ-A0ZB-10A	'--	'--	'--	'--	'--	162	'--	'--	'--	'--	'--	'--	'--	'--	FALSE	'--	'--	false	'--	'--	'--	Blood Derived Normal	10	'--	released	'--	'--	'--	Not Reported	'--	'--	'--
TCGA-THCA	dc4d8468-6f34-40cb-a826-8d582cd86fde	TCGA-BJ-A0ZB	273dfc19-4760-4cf3-bec5-570c16d37f09	TCGA-BJ-A0ZB-01Z	'--	'--	'--	'--	'--	'--	0	'--	'--	'--	'--	'--	'--	'--	TRUE	'--	'--	No	'--	'--	FFPE	Primary Tumor	1	'--	released	'--	'--	'--	Not Reported	'--	'--	'--
TCGA-THCA	dc4d8468-6f34-40cb-a826-8d582cd86fde	TCGA-BJ-A0ZB	145a474e-d262-468a-8db7-ee9f1b7ce0a7	TCGA-BJ-A0ZB-01A	'--	'--	'--	'--	'--	162	'--	'--	'--	'--	'--	'--	250.0	'--	FALSE	'--	'--	true	'--	026940CA-36B1-4AF8-996D-1BF8D108CD7A	'--	Primary Tumor	1	'--	released	'--	'--	'--	Not Reported	'--	'--	'--
TCGA-THCA	25d8a79e-15fd-4c8a-a7f6-05d78973b757	TCGA-H2-A2K9	aed3b953-1d76-4c15-92a9-610dfcf13118	TCGA-H2-A2K9-01A	'--	'--	'--	'--	'--	127	'--	'--	'--	'--	'--	'--	260.0	'--	FALSE	'--	'--	false	'--	726162B8-E14A-49DE-8164-70EDB6609EC8	'--	Primary Tumor	1	'--	released	'--	'--	'--	Not Reported	'--	'--	'--
TCGA-THCA	25d8a79e-15fd-4c8a-a7f6-05d78973b757	TCGA-H2-A2K9	9431ffb2-133b-4945-9506-5e3b7337054a	TCGA-H2-A2K9-01Z	'--	'--	'--	'--	'--	'--	0	'--	'--	'--	'--	'--	'--	'--	TRUE	'--	'--	No	'--	'--	FFPE	Primary Tumor	1	'--	released	'--	'--	'--	Not Reported	'--	'--	'--
TCGA-THCA	25d8a79e-15fd-4c8a-a7f6-05d78973b757	TCGA-H2-A2K9	c033df1d-6755-48bb-b323-279e9790d8a2	TCGA-H2-A2K9-11A	'--	'--	'--	'--	'--	127	'--	'--	'--	'--	'--	'--	280.0	'--	FALSE	'--	'--	false	'--	'--	'--	Solid Tissue Normal	11	'--	released	'--	'--	'--	Not Reported	'--	'--	'--
TCGA-THCA	25d8a79e-15fd-4c8a-a7f6-05d78973b757	TCGA-H2-A2K9	3d907501-ff84-44d4-9bad-78860a3da74f	TCGA-H2-A2K9-10A	'--	'--	'--	'--	'--	127	'--	'--	'--	'--	'--	'--	'--	'--	FALSE	'--	'--	false	'--	'--	'--	Blood Derived Normal	10	'--	released	'--	'--	'--	Not Reported	'--	'--	'--
TCGA-THCA	8a3659a8-2a85-4bab-8bf3-55795922474c	TCGA-EM-A1YD	ad5054bb-96d0-47cc-bb8c-f36e58784a31	TCGA-EM-A1YD-01A	'--	'--	'--	'--	'--	1372	'--	'--	'--	'--	'--	'--	120.0	'--	FALSE	'--	'--	false	'--	20E7B915-FBA5-422C-98CD-008444AAF8F0	'--	Primary Tumor	1	'--	released	'--	'--	'--	Not Reported	'--	'--	'--
TCGA-THCA	8a3659a8-2a85-4bab-8bf3-55795922474c	TCGA-EM-A1YD	b5efe349-b8d1-4b10-95d7-24b2233c1afb	TCGA-EM-A1YD-11A	'--	'--	'--	'--	'--	1372	'--	'--	'--	'--	'--	'--	180.0	'--	FALSE	'--	'--	false	'--	'--	'--	Solid Tissue Normal	11	'--	released	'--	'--	'--	Not Reported	'--	'--	'--
TCGA-THCA	8a3659a8-2a85-4bab-8bf3-55795922474c	TCGA-EM-A1YD	0729cd1b-44af-43f2-a300-816c7fa5de83	TCGA-EM-A1YD-01Z	'--	'--	'--	'--	'--	'--	0	'--	'--	'--	'--	'--	'--	'--	TRUE	'--	'--	No	'--	'--	FFPE	Primary Tumor	1	'--	released	'--	'--	'--	Not Reported	'--	'--	'--
TCGA-THCA	85def63a-39ab-4c83-ab8c-02c6f702f05d	TCGA-DE-A4MC	1f36b318-34fb-43eb-b253-84997106f05b	TCGA-DE-A4MC-10A	'--	'--	'--	'--	'--	444	'--	'--	'--	'--	'--	'--	'--	'--	FALSE	'--	'--	false	'--	'--	'--	Blood Derived Normal	10	'--	released	'--	'--	'--	Not Reported	'--	'--	'--
TCGA-THCA	85def63a-39ab-4c83-ab8c-02c6f702f05d	TCGA-DE-A4MC	c7bb4564-af84-460d-ba07-78292df59c97	TCGA-DE-A4MC-01A	'--	'--	'--	'--	'--	444	'--	'--	'--	'--	'--	'--	260.0	'--	FALSE	'--	'--	false	'--	FAD65DE3-2C89-4A88-AB39-6B9B9BC0954C	'--	Primary Tumor	1	'--	released	'--	'--	'--	Not Reported	'--	'--	'--
TCGA-THCA	85def63a-39ab-4c83-ab8c-02c6f702f05d	TCGA-DE-A4MC	197bdfac-227b-4e54-bb77-b5a633905e6a	TCGA-DE-A4MC-01Z	'--	'--	'--	'--	'--	'--	0	'--	'--	'--	'--	'--	'--	'--	TRUE	'--	'--	No	'--	'--	FFPE	Primary Tumor	1	'--	released	'--	'--	'--	Not Reported	'--	'--	'--
TCGA-THCA	78d14f86-896a-4f98-9274-b2e8e387add9	TCGA-FE-A22Z	7727f473-c83d-4cf2-b779-c4fdb6172aa7	TCGA-FE-A22Z-10A	'--	'--	'--	'--	'--	1538	'--	'--	'--	'--	'--	'--	'--	'--	FALSE	'--	'--	false	'--	'--	'--	Blood Derived Normal	10	'--	released	'--	'--	'--	Not Reported	'--	'--	'--
TCGA-THCA	78d14f86-896a-4f98-9274-b2e8e387add9	TCGA-FE-A22Z	d206d300-e0ce-4a40-af1f-45a685346a6e	TCGA-FE-A22Z-01A	'--	'--	'--	'--	'--	1526	'--	'--	'--	'--	'--	'--	130.0	'--	FALSE	'--	'--	false	'--	710D01CA-DAD1-4A53-9CC4-A859A813656D	'--	Primary Tumor	1	'--	released	'--	'--	'--	Not Reported	'--	'--	'--
TCGA-THCA	78d14f86-896a-4f98-9274-b2e8e387add9	TCGA-FE-A22Z	2b225a42-a2bb-446b-a57e-5a1af0086325	TCGA-FE-A22Z-01Z	'--	'--	'--	'--	'--	'--	0	'--	'--	'--	'--	'--	'--	'--	TRUE	'--	'--	No	'--	'--	FFPE	Primary Tumor	1	'--	released	'--	'--	'--	Not Reported	'--	'--	'--
TCGA-THCA	6592a7db-cbc7-4afd-9fdb-5cc16c16eeca	TCGA-DJ-A3V3	ded6a6e0-43fe-4ff5-9023-181b9fdf30a3	TCGA-DJ-A3V3-10A	'--	'--	'--	'--	'--	464	'--	'--	'--	'--	'--	'--	'--	'--	FALSE	'--	'--	false	'--	'--	'--	Blood Derived Normal	10	'--	released	'--	'--	'--	Not Reported	'--	'--	'--
TCGA-THCA	6592a7db-cbc7-4afd-9fdb-5cc16c16eeca	TCGA-DJ-A3V3	87bf1daa-ea8c-4fbb-9d06-a8821cc8f7c0	TCGA-DJ-A3V3-01Z	'--	'--	'--	'--	'--	'--	0	'--	'--	'--	'--	'--	'--	'--	TRUE	'--	'--	No	'--	'--	FFPE	Primary Tumor	1	'--	released	'--	'--	'--	Not Reported	'--	'--	'--
TCGA-THCA	6592a7db-cbc7-4afd-9fdb-5cc16c16eeca	TCGA-DJ-A3V3	7c14e252-52b9-4944-858e-479f29f156b7	TCGA-DJ-A3V3-01A	'--	'--	'--	'--	'--	464	'--	'--	'--	'--	'--	'--	140.0	'--	FALSE	'--	'--	true	'--	1DA78954-60CB-4A8D-9943-02417D2ECF9D	'--	Primary Tumor	1	'--	released	'--	'--	'--	Not Reported	'--	'--	'--
TCGA-THCA	13c97cfb-eea2-4ae8-9209-c967d9642cef	TCGA-DJ-A2Q5	7341a14e-82eb-471a-b2a5-3c132e74004b	TCGA-DJ-A2Q5-10A	'--	'--	'--	'--	'--	139	'--	'--	'--	'--	'--	'--	'--	'--	FALSE	'--	'--	false	'--	'--	'--	Blood Derived Normal	10	'--	released	'--	'--	'--	Not Reported	'--	'--	'--
TCGA-THCA	13c97cfb-eea2-4ae8-9209-c967d9642cef	TCGA-DJ-A2Q5	6c1291ce-5229-4111-8702-e372b51df41b	TCGA-DJ-A2Q5-01Z	'--	'--	'--	'--	'--	'--	0	'--	'--	'--	'--	'--	'--	'--	TRUE	'--	'--	No	'--	'--	FFPE	Primary Tumor	1	'--	released	'--	'--	'--	Not Reported	'--	'--	'--
TCGA-THCA	13c97cfb-eea2-4ae8-9209-c967d9642cef	TCGA-DJ-A2Q5	56fa075b-09e2-4db9-a997-0b7eb2198b6c	TCGA-DJ-A2Q5-01A	'--	'--	'--	'--	'--	139	'--	'--	'--	'--	'--	'--	420.0	'--	FALSE	'--	'--	true	'--	5291CCC7-0571-48D7-B523-7B0F05C8749D	'--	Primary Tumor	1	'--	released	'--	'--	'--	Not Reported	'--	'--	'--
TCGA-THCA	ab17d69e-0078-4206-939e-e4784fdc9a96	TCGA-EL-A3CY	4684ba13-eda5-4cf7-bf4f-782500660a18	TCGA-EL-A3CY-01Z	'--	'--	'--	'--	'--	'--	0	'--	'--	'--	'--	'--	'--	'--	TRUE	'--	'--	No	'--	'--	FFPE	Primary Tumor	1	'--	released	'--	'--	'--	Not Reported	'--	'--	'--
TCGA-THCA	ab17d69e-0078-4206-939e-e4784fdc9a96	TCGA-EL-A3CY	4332d54e-6bfc-48f1-849f-8de4af00d091	TCGA-EL-A3CY-10A	'--	'--	'--	'--	'--	4097	'--	'--	'--	'--	'--	'--	'--	'--	FALSE	'--	'--	false	'--	'--	'--	Blood Derived Normal	10	'--	released	'--	'--	'--	Not Reported	'--	'--	'--
TCGA-THCA	ab17d69e-0078-4206-939e-e4784fdc9a96	TCGA-EL-A3CY	30955dd6-81c0-48d0-bda2-bb36b546ac11	TCGA-EL-A3CY-01A	'--	'--	'--	'--	'--	4097	'--	'--	'--	'--	'--	'--	320.0	'--	FALSE	'--	'--	true	'--	13075C98-71F2-4A1D-B245-C3AB202CA0B4	'--	Primary Tumor	1	'--	released	'--	'--	'--	Not Reported	'--	'--	'--
TCGA-THCA	c115df9d-cec4-4d7a-87f0-36a5c1f1d51f	TCGA-ET-A3BO	0e3a2446-2534-44db-b8d5-64f6349e1997	TCGA-ET-A3BO-10A	'--	'--	'--	'--	'--	283	'--	'--	'--	'--	'--	'--	'--	'--	FALSE	'--	'--	false	'--	'--	'--	Blood Derived Normal	10	'--	released	'--	'--	'--	Not Reported	'--	'--	'--
TCGA-THCA	c115df9d-cec4-4d7a-87f0-36a5c1f1d51f	TCGA-ET-A3BO	57fb70c7-6953-46ff-a186-e08e3824a281	TCGA-ET-A3BO-01Z	'--	'--	'--	'--	'--	'--	0	'--	'--	'--	'--	'--	'--	'--	TRUE	'--	'--	No	'--	'--	FFPE	Primary Tumor	1	'--	released	'--	'--	'--	Not Reported	'--	'--	'--
TCGA-THCA	c115df9d-cec4-4d7a-87f0-36a5c1f1d51f	TCGA-ET-A3BO	9e9851c2-ff6c-422d-a084-535e64d21cda	TCGA-ET-A3BO-01A	'--	'--	'--	'--	'--	283	'--	'--	'--	'--	'--	'--	80.0	'--	FALSE	'--	'--	true	'--	EA12FC89-CE8B-4829-BDD1-F5315EAC4B5F	'--	Primary Tumor	1	'--	released	'--	'--	'--	Not Reported	'--	'--	'--
TCGA-THCA	64de42bd-d134-4f44-82fa-d6614709bf01	TCGA-EL-A3ZT	e31a612a-014e-4b1a-8ae7-ef09c3f05f56	TCGA-EL-A3ZT-01A	'--	'--	'--	'--	'--	1311	'--	'--	'--	'--	'--	'--	170.0	'--	FALSE	'--	'--	false	'--	F19BB96F-31BF-466F-B1FB-0CBB1EE89A88	'--	Primary Tumor	1	'--	released	'--	'--	'--	Not Reported	'--	'--	'--
TCGA-THCA	64de42bd-d134-4f44-82fa-d6614709bf01	TCGA-EL-A3ZT	2fef5659-a53b-4eff-b211-89026cf232c2	TCGA-EL-A3ZT-01Z	'--	'--	'--	'--	'--	'--	0	'--	'--	'--	'--	'--	'--	'--	TRUE	'--	'--	No	'--	'--	FFPE	Primary Tumor	1	'--	released	'--	'--	'--	Not Reported	'--	'--	'--
TCGA-THCA	64de42bd-d134-4f44-82fa-d6614709bf01	TCGA-EL-A3ZT	15d0f8cc-eb24-47b0-8ca1-83940791959b	TCGA-EL-A3ZT-11A	'--	'--	'--	'--	'--	1311	'--	'--	'--	'--	'--	'--	240.0	'--	FALSE	'--	'--	false	'--	'--	'--	Solid Tissue Normal	11	'--	released	'--	'--	'--	Not Reported	'--	'--	'--
TCGA-THCA	b2e6933f-50e1-48e3-ae1f-173e1bc889ff	TCGA-EM-A3FO	c6919e35-0f23-4e1c-b26d-7bae49b1eac5	TCGA-EM-A3FO-10A	'--	'--	'--	'--	'--	211	'--	'--	'--	'--	'--	'--	'--	'--	FALSE	'--	'--	false	'--	'--	'--	Blood Derived Normal	10	'--	released	'--	'--	'--	Not Reported	'--	'--	'--
TCGA-THCA	b2e6933f-50e1-48e3-ae1f-173e1bc889ff	TCGA-EM-A3FO	9220bd12-625b-4284-8d1d-bd6dfd82f772	TCGA-EM-A3FO-01Z	'--	'--	'--	'--	'--	'--	0	'--	'--	'--	'--	'--	'--	'--	TRUE	'--	'--	No	'--	'--	FFPE	Primary Tumor	1	'--	released	'--	'--	'--	Not Reported	'--	'--	'--
TCGA-THCA	b2e6933f-50e1-48e3-ae1f-173e1bc889ff	TCGA-EM-A3FO	cb5bda84-01a5-498e-8df7-deb78d9d9b35	TCGA-EM-A3FO-01A	'--	'--	'--	'--	'--	148	'--	'--	'--	'--	'--	'--	100.0	'--	FALSE	'--	'--	false	'--	9AD500BD-2288-4319-A686-7AB6FF840D8D	'--	Primary Tumor	1	'--	released	'--	'--	'--	Not Reported	'--	'--	'--
TCGA-THCA	9aa61ab5-f675-43dd-8a99-077164b41f30	TCGA-J8-A3YG	efe36760-2620-4105-85ad-ce71482fd195	TCGA-J8-A3YG-01Z	'--	'--	'--	'--	'--	'--	0	'--	'--	'--	'--	'--	'--	'--	TRUE	'--	'--	No	'--	'--	FFPE	Primary Tumor	1	'--	released	'--	'--	'--	Not Reported	'--	'--	'--
TCGA-THCA	9aa61ab5-f675-43dd-8a99-077164b41f30	TCGA-J8-A3YG	f87ad974-9699-4545-b402-913508ba63a5	TCGA-J8-A3YG-01A	'--	'--	'--	'--	'--	609	'--	'--	'--	'--	'--	'--	60.0	'--	FALSE	'--	'--	true	'--	33C2ECE3-CA9B-476A-AA2A-F60FCCECD6BF	'--	Primary Tumor	1	'--	released	'--	'--	'--	Not Reported	'--	'--	'--
TCGA-THCA	9aa61ab5-f675-43dd-8a99-077164b41f30	TCGA-J8-A3YG	5544f2f7-c840-48f2-8f4d-d2c32cd58b5c	TCGA-J8-A3YG-10A	'--	'--	'--	'--	'--	609	'--	'--	'--	'--	'--	'--	'--	'--	FALSE	'--	'--	false	'--	'--	'--	Blood Derived Normal	10	'--	released	'--	'--	'--	Not Reported	'--	'--	'--
TCGA-THCA	f9d35f8e-ada4-4cc6-8227-28565ee531d2	TCGA-BJ-A2NA	5749926a-9488-4a3d-b6af-c73070ace391	TCGA-BJ-A2NA-11A	'--	'--	'--	'--	'--	148	'--	'--	'--	'--	'--	'--	270.0	'--	FALSE	'--	'--	true	'--	'--	'--	Solid Tissue Normal	11	'--	released	'--	'--	'--	Not Reported	'--	'--	'--
TCGA-THCA	f9d35f8e-ada4-4cc6-8227-28565ee531d2	TCGA-BJ-A2NA	d83ce2c6-64f1-442a-9941-43365b8539fb	TCGA-BJ-A2NA-10A	'--	'--	'--	'--	'--	148	'--	'--	'--	'--	'--	'--	'--	'--	FALSE	'--	'--	false	'--	'--	'--	Blood Derived Normal	10	'--	released	'--	'--	'--	Not Reported	'--	'--	'--
TCGA-THCA	f9d35f8e-ada4-4cc6-8227-28565ee531d2	TCGA-BJ-A2NA	c3474541-d038-4163-80fd-acf4cd3ce851	TCGA-BJ-A2NA-01A	'--	'--	'--	'--	'--	148	'--	'--	'--	'--	'--	'--	240.0	'--	FALSE	'--	'--	true	'--	24BC880A-E148-4D78-8C33-5F8FB59258E5	'--	Primary Tumor	1	'--	released	'--	'--	'--	Not Reported	'--	'--	'--
TCGA-THCA	f9d35f8e-ada4-4cc6-8227-28565ee531d2	TCGA-BJ-A2NA	f127d04a-e842-46e0-912a-bf0b770b5198	TCGA-BJ-A2NA-01Z	'--	'--	'--	'--	'--	'--	0	'--	'--	'--	'--	'--	'--	'--	TRUE	'--	'--	No	'--	'--	FFPE	Primary Tumor	1	'--	released	'--	'--	'--	Not Reported	'--	'--	'--
TCGA-THCA	ab0a98ae-98f1-425e-9418-550df6ac24cd	TCGA-DJ-A3UZ	8751fdee-c1bd-4c8b-aeb0-87e996094a20	TCGA-DJ-A3UZ-01Z	'--	'--	'--	'--	'--	'--	0	'--	'--	'--	'--	'--	'--	'--	TRUE	'--	'--	No	'--	'--	FFPE	Primary Tumor	1	'--	released	'--	'--	'--	Not Reported	'--	'--	'--
TCGA-THCA	ab0a98ae-98f1-425e-9418-550df6ac24cd	TCGA-DJ-A3UZ	5146bb48-50be-4d3c-815b-b05708ce3064	TCGA-DJ-A3UZ-01A	'--	'--	'--	'--	'--	289	'--	'--	'--	'--	'--	'--	190.0	'--	FALSE	'--	'--	true	'--	16D17ADE-B455-481E-A233-76E96DDCB635	'--	Primary Tumor	1	'--	released	'--	'--	'--	Not Reported	'--	'--	'--
TCGA-THCA	ab0a98ae-98f1-425e-9418-550df6ac24cd	TCGA-DJ-A3UZ	48c63845-4636-4ca5-9b5b-ab94500b2211	TCGA-DJ-A3UZ-10A	'--	'--	'--	'--	'--	289	'--	'--	'--	'--	'--	'--	'--	'--	FALSE	'--	'--	false	'--	'--	'--	Blood Derived Normal	10	'--	released	'--	'--	'--	Not Reported	'--	'--	'--
TCGA-THCA	fb39f29a-5d1e-4f96-8adb-e18cc87fad2e	TCGA-DJ-A2PN	553b1b65-78ee-4d12-97fe-452915ab5e2c	TCGA-DJ-A2PN-01Z	'--	'--	'--	'--	'--	'--	0	'--	'--	'--	'--	'--	'--	'--	TRUE	'--	'--	No	'--	'--	FFPE	Primary Tumor	1	'--	released	'--	'--	'--	Not Reported	'--	'--	'--
TCGA-THCA	fb39f29a-5d1e-4f96-8adb-e18cc87fad2e	TCGA-DJ-A2PN	e04668c7-b060-471c-8fa8-d782dda94c53	TCGA-DJ-A2PN-10A	'--	'--	'--	'--	'--	237	'--	'--	'--	'--	'--	'--	'--	'--	FALSE	'--	'--	false	'--	'--	'--	Blood Derived Normal	10	'--	released	'--	'--	'--	Not Reported	'--	'--	'--
TCGA-THCA	fb39f29a-5d1e-4f96-8adb-e18cc87fad2e	TCGA-DJ-A2PN	d156e12d-4d39-4e10-b1d7-c3b664bbfc7e	TCGA-DJ-A2PN-01A	'--	'--	'--	'--	'--	237	'--	'--	'--	'--	'--	'--	380.0	'--	FALSE	'--	'--	true	'--	894CA3E0-0279-45E2-8762-E53EEBE01272	'--	Primary Tumor	1	'--	released	'--	'--	'--	Not Reported	'--	'--	'--
TCGA-THCA	2d633ced-ae85-462c-90e7-c1b109e084cf	TCGA-E8-A44M	6296efe7-08bb-45fc-ae3f-cc07b5042033	TCGA-E8-A44M-01A	'--	'--	'--	'--	'--	72	'--	'--	'--	'--	'--	'--	210.0	'--	FALSE	'--	'--	true	'--	596CF3BD-A887-4BDB-BFCA-10046877BC94	'--	Primary Tumor	1	'--	released	'--	'--	'--	Not Reported	'--	'--	'--
TCGA-THCA	2d633ced-ae85-462c-90e7-c1b109e084cf	TCGA-E8-A44M	1d8aca3e-6a4f-4389-afd4-037842c27f7a	TCGA-E8-A44M-01Z	'--	'--	'--	'--	'--	'--	0	'--	'--	'--	'--	'--	'--	'--	TRUE	'--	'--	No	'--	'--	FFPE	Primary Tumor	1	'--	released	'--	'--	'--	Not Reported	'--	'--	'--
TCGA-THCA	2d633ced-ae85-462c-90e7-c1b109e084cf	TCGA-E8-A44M	2a8d89e4-d253-45bc-8c1a-b010c585fdd3	TCGA-E8-A44M-10A	'--	'--	'--	'--	'--	72	'--	'--	'--	'--	'--	'--	'--	'--	FALSE	'--	'--	false	'--	'--	'--	Blood Derived Normal	10	'--	released	'--	'--	'--	Not Reported	'--	'--	'--
TCGA-THCA	d684399e-46c4-4bad-92e9-3de17c9f9a5f	TCGA-L6-A4EQ	d445a8b0-2540-4eee-97a1-c814bdf54e44	TCGA-L6-A4EQ-01Z	'--	'--	'--	'--	'--	'--	0	'--	'--	'--	'--	'--	'--	'--	TRUE	'--	'--	No	'--	'--	FFPE	Primary Tumor	1	'--	released	'--	'--	'--	Not Reported	'--	'--	'--
TCGA-THCA	d684399e-46c4-4bad-92e9-3de17c9f9a5f	TCGA-L6-A4EQ	1e4871d7-7bf5-4603-9a52-249a048ad910	TCGA-L6-A4EQ-10A	'--	'--	'--	'--	'--	847	'--	'--	'--	'--	'--	'--	'--	'--	FALSE	'--	'--	true	'--	'--	'--	Blood Derived Normal	10	'--	released	'--	'--	'--	Not Reported	'--	'--	'--
TCGA-THCA	d684399e-46c4-4bad-92e9-3de17c9f9a5f	TCGA-L6-A4EQ	a17cb817-6489-491b-8c20-a8b1263a9e02	TCGA-L6-A4EQ-01A	'--	'--	'--	'--	'--	847	'--	'--	'--	'--	'--	'--	370.0	'--	FALSE	'--	'--	true	'--	E74C0B3F-6261-4C59-8A1F-6DD5975637D2	'--	Primary Tumor	1	'--	released	'--	'--	'--	Not Reported	'--	'--	'--
TCGA-THCA	72d8dcc3-0709-4fd1-98d4-fb75e9340758	TCGA-BJ-A0Z0	51fe3d91-4914-49fc-b69c-990c1dd09e1c	TCGA-BJ-A0Z0-01A	'--	'--	'--	'--	'--	183	'--	'--	'--	'--	'--	'--	360.0	'--	FALSE	'--	'--	true	'--	55206358-DB4D-4FD8-B634-A2DB15F8F7C1	'--	Primary Tumor	1	'--	released	'--	'--	'--	Not Reported	'--	'--	'--
TCGA-THCA	72d8dcc3-0709-4fd1-98d4-fb75e9340758	TCGA-BJ-A0Z0	46a7591e-8bd4-4395-b44d-fbe9f3690175	TCGA-BJ-A0Z0-10A	'--	'--	'--	'--	'--	183	'--	'--	'--	'--	'--	'--	'--	'--	FALSE	'--	'--	false	'--	'--	'--	Blood Derived Normal	10	'--	released	'--	'--	'--	Not Reported	'--	'--	'--
TCGA-THCA	72d8dcc3-0709-4fd1-98d4-fb75e9340758	TCGA-BJ-A0Z0	dc2532d4-276f-4ae8-b76b-3ae4aa70f13e	TCGA-BJ-A0Z0-01Z	'--	'--	'--	'--	'--	'--	0	'--	'--	'--	'--	'--	'--	'--	TRUE	'--	'--	No	'--	'--	FFPE	Primary Tumor	1	'--	released	'--	'--	'--	Not Reported	'--	'--	'--
TCGA-THCA	856893d6-0ed7-422b-ac19-1a5871088805	TCGA-EL-A3GX	c87d1273-71d1-4773-85b1-72ab7c30e82f	TCGA-EL-A3GX-01Z	'--	'--	'--	'--	'--	'--	0	'--	'--	'--	'--	'--	'--	'--	TRUE	'--	'--	No	'--	'--	FFPE	Primary Tumor	1	'--	released	'--	'--	'--	Not Reported	'--	'--	'--
TCGA-THCA	856893d6-0ed7-422b-ac19-1a5871088805	TCGA-EL-A3GX	e6135bb9-c711-4141-a573-91b022146ab1	TCGA-EL-A3GX-10A	'--	'--	'--	'--	'--	4200	'--	'--	'--	'--	'--	'--	'--	'--	FALSE	'--	'--	false	'--	'--	'--	Blood Derived Normal	10	'--	released	'--	'--	'--	Not Reported	'--	'--	'--
TCGA-THCA	856893d6-0ed7-422b-ac19-1a5871088805	TCGA-EL-A3GX	f3cc6f9c-3fe1-47c6-9bae-5c04daf4c640	TCGA-EL-A3GX-01A	'--	'--	'--	'--	'--	4200	'--	'--	'--	'--	'--	'--	230.0	'--	FALSE	'--	'--	false	'--	0449885B-38F1-423D-94F1-F34F9AD0A660	'--	Primary Tumor	1	'--	released	'--	'--	'--	Not Reported	'--	'--	'--
TCGA-THCA	eb15422b-cafd-4af2-973e-8c997a911170	TCGA-ET-A2MY	6246690e-7b81-4358-9a23-1f35a4b727e2	TCGA-ET-A2MY-01Z	'--	'--	'--	'--	'--	'--	0	'--	'--	'--	'--	'--	'--	'--	TRUE	'--	'--	No	'--	'--	FFPE	Primary Tumor	1	'--	released	'--	'--	'--	Not Reported	'--	'--	'--
TCGA-THCA	eb15422b-cafd-4af2-973e-8c997a911170	TCGA-ET-A2MY	be7674cb-f32e-4b9b-84f4-850b3b8147d8	TCGA-ET-A2MY-01A	'--	'--	'--	'--	'--	469	'--	'--	'--	'--	'--	'--	130.0	'--	FALSE	'--	'--	true	'--	E90820AD-FDE0-40AD-B8C3-F5452941AFBD	'--	Primary Tumor	1	'--	released	'--	'--	'--	Not Reported	'--	'--	'--
TCGA-THCA	eb15422b-cafd-4af2-973e-8c997a911170	TCGA-ET-A2MY	eab52a35-305a-4915-ae27-53c39ba215fc	TCGA-ET-A2MY-11B	'--	'--	'--	'--	'--	490	'--	'--	'--	'--	'--	'--	250.0	'--	FALSE	'--	'--	true	'--	'--	'--	Solid Tissue Normal	11	'--	released	'--	'--	'--	Not Reported	'--	'--	'--
TCGA-THCA	ca625067-1c6d-45c7-b752-af40c8327ea5	TCGA-EM-A4G1	f0b9fabc-051b-4fc3-88e0-7bf326b8da3e	TCGA-EM-A4G1-01A	'--	'--	'--	'--	'--	30	'--	'--	'--	'--	'--	'--	120.0	'--	FALSE	'--	'--	false	'--	EF0C5187-A9B3-4EFC-A2AE-A78381C4DD8D	'--	Primary Tumor	1	'--	released	'--	'--	'--	Not Reported	'--	'--	'--
TCGA-THCA	ca625067-1c6d-45c7-b752-af40c8327ea5	TCGA-EM-A4G1	ea35fdda-14f8-4e42-acc7-722d124c6957	TCGA-EM-A4G1-10A	'--	'--	'--	'--	'--	30	'--	'--	'--	'--	'--	'--	'--	'--	FALSE	'--	'--	false	'--	'--	'--	Blood Derived Normal	10	'--	released	'--	'--	'--	Not Reported	'--	'--	'--
TCGA-THCA	ca625067-1c6d-45c7-b752-af40c8327ea5	TCGA-EM-A4G1	828e8520-a3ab-4f78-a393-bbaaa42ee7f6	TCGA-EM-A4G1-01Z	'--	'--	'--	'--	'--	'--	0	'--	'--	'--	'--	'--	'--	'--	TRUE	'--	'--	No	'--	'--	FFPE	Primary Tumor	1	'--	released	'--	'--	'--	Not Reported	'--	'--	'--
TCGA-THCA	89c72f0e-e724-4826-bb9c-d7524d1b1258	TCGA-DE-A4MA	78533062-e4b4-4dde-80c1-277c897e2e35	TCGA-DE-A4MA-01Z	'--	'--	'--	'--	'--	'--	0	'--	'--	'--	'--	'--	'--	'--	TRUE	'--	'--	No	'--	'--	FFPE	Primary Tumor	1	'--	released	'--	'--	'--	Not Reported	'--	'--	'--
TCGA-THCA	89c72f0e-e724-4826-bb9c-d7524d1b1258	TCGA-DE-A4MA	08d727a7-4064-42c7-ba45-13eadda0bf8e	TCGA-DE-A4MA-10A	'--	'--	'--	'--	'--	527	'--	'--	'--	'--	'--	'--	'--	'--	FALSE	'--	'--	false	'--	'--	'--	Blood Derived Normal	10	'--	released	'--	'--	'--	Not Reported	'--	'--	'--
TCGA-THCA	89c72f0e-e724-4826-bb9c-d7524d1b1258	TCGA-DE-A4MA	2b19c88d-9bc3-4c86-aaeb-77f523f7fe50	TCGA-DE-A4MA-01A	'--	'--	'--	'--	'--	527	'--	'--	'--	'--	'--	'--	180.0	'--	FALSE	'--	'--	false	'--	E9906C93-0069-4908-8547-729F5A015FAC	'--	Primary Tumor	1	'--	released	'--	'--	'--	Not Reported	'--	'--	'--
TCGA-THCA	34d4cc10-b868-4e85-96a5-8680fc729e34	TCGA-EL-A3N2	3d0e6324-8647-46be-99a3-4ea26e309500	TCGA-EL-A3N2-01A	'--	'--	'--	'--	'--	92	'--	'--	'--	'--	'--	'--	250.0	'--	FALSE	'--	'--	false	'--	F1399697-D1A7-4B59-ACF2-1DDE8C6733AF	'--	Primary Tumor	1	'--	released	'--	'--	'--	Not Reported	'--	'--	'--
TCGA-THCA	34d4cc10-b868-4e85-96a5-8680fc729e34	TCGA-EL-A3N2	e27c5406-fb68-4b1a-b300-2b60c9c3c1eb	TCGA-EL-A3N2-01Z	'--	'--	'--	'--	'--	'--	0	'--	'--	'--	'--	'--	'--	'--	TRUE	'--	'--	No	'--	'--	FFPE	Primary Tumor	1	'--	released	'--	'--	'--	Not Reported	'--	'--	'--
TCGA-THCA	34d4cc10-b868-4e85-96a5-8680fc729e34	TCGA-EL-A3N2	3c8f6d77-04ee-457e-8e16-e568c424a679	TCGA-EL-A3N2-11A	'--	'--	'--	'--	'--	92	'--	'--	'--	'--	'--	'--	220.0	'--	FALSE	'--	'--	false	'--	'--	'--	Solid Tissue Normal	11	'--	released	'--	'--	'--	Not Reported	'--	'--	'--
TCGA-THCA	23f47401-1bab-4395-970f-4e388aab2542	TCGA-E8-A414	6bd8b6e3-7205-4507-8a32-703e3d127248	TCGA-E8-A414-01A	'--	'--	'--	'--	'--	72	'--	'--	'--	'--	'--	'--	520.0	'--	FALSE	'--	'--	true	'--	ACDA1B0C-0F5D-40E3-936A-C96D921B861A	'--	Primary Tumor	1	'--	released	'--	'--	'--	Not Reported	'--	'--	'--
TCGA-THCA	23f47401-1bab-4395-970f-4e388aab2542	TCGA-E8-A414	e503914c-7a83-42c5-b55f-328bfc8e59c1	TCGA-E8-A414-10A	'--	'--	'--	'--	'--	72	'--	'--	'--	'--	'--	'--	'--	'--	FALSE	'--	'--	false	'--	'--	'--	Blood Derived Normal	10	'--	released	'--	'--	'--	Not Reported	'--	'--	'--
TCGA-THCA	23f47401-1bab-4395-970f-4e388aab2542	TCGA-E8-A414	bf3d9835-da22-4025-bc93-7de439cb45c6	TCGA-E8-A414-01Z	'--	'--	'--	'--	'--	'--	0	'--	'--	'--	'--	'--	'--	'--	TRUE	'--	'--	No	'--	'--	FFPE	Primary Tumor	1	'--	released	'--	'--	'--	Not Reported	'--	'--	'--
TCGA-THCA	1a4164d9-4484-452d-9382-8cbf896a870e	TCGA-EM-A22P	ce82a05b-8961-40ef-8ed0-284f5e8da00e	TCGA-EM-A22P-01Z	'--	'--	'--	'--	'--	'--	0	'--	'--	'--	'--	'--	'--	'--	TRUE	'--	'--	No	'--	'--	FFPE	Primary Tumor	1	'--	released	'--	'--	'--	Not Reported	'--	'--	'--
TCGA-THCA	1a4164d9-4484-452d-9382-8cbf896a870e	TCGA-EM-A22P	f05d533d-f49c-4a25-80bd-4eb2cfaee97f	TCGA-EM-A22P-10A	'--	'--	'--	'--	'--	115	'--	'--	'--	'--	'--	'--	'--	'--	FALSE	'--	'--	false	'--	'--	'--	Blood Derived Normal	10	'--	released	'--	'--	'--	Not Reported	'--	'--	'--
TCGA-THCA	1a4164d9-4484-452d-9382-8cbf896a870e	TCGA-EM-A22P	775f1197-ac0c-47e1-b63e-cc1d3c63151d	TCGA-EM-A22P-01A	'--	'--	'--	'--	'--	31	'--	'--	'--	'--	'--	'--	120.0	'--	FALSE	'--	'--	false	'--	6BF2EBFF-85D8-4F48-A68B-3DDDA60183D5	'--	Primary Tumor	1	'--	released	'--	'--	'--	Not Reported	'--	'--	'--
TCGA-THCA	2f9ed09d-2626-4c23-ba47-1850d36f812a	TCGA-ET-A25K	38379990-627c-4fac-a13a-6afd9d47a448	TCGA-ET-A25K-10A	'--	'--	'--	'--	'--	720	'--	'--	'--	'--	'--	'--	'--	'--	FALSE	'--	'--	false	'--	'--	'--	Blood Derived Normal	10	'--	released	'--	'--	'--	Not Reported	'--	'--	'--
TCGA-THCA	2f9ed09d-2626-4c23-ba47-1850d36f812a	TCGA-ET-A25K	afcb7327-3b08-47d3-b9d6-fee46cc73b7f	TCGA-ET-A25K-01Z	'--	'--	'--	'--	'--	'--	0	'--	'--	'--	'--	'--	'--	'--	TRUE	'--	'--	No	'--	'--	FFPE	Primary Tumor	1	'--	released	'--	'--	'--	Not Reported	'--	'--	'--
TCGA-THCA	2f9ed09d-2626-4c23-ba47-1850d36f812a	TCGA-ET-A25K	343311b1-d586-4f92-9984-32af1afb1f62	TCGA-ET-A25K-01A	'--	'--	'--	'--	'--	720	'--	'--	'--	'--	'--	'--	40.0	'--	FALSE	'--	'--	true	'--	2BBDC29D-287A-4275-8B15-C2074EEA1243	'--	Primary Tumor	1	'--	released	'--	'--	'--	Not Reported	'--	'--	'--
TCGA-THCA	2501ee46-8d38-448b-8765-e9c9706cbbe8	TCGA-BJ-A191	88a3a560-fb2d-4e5e-b7b5-831cf7f9671c	TCGA-BJ-A191-10A	'--	'--	'--	'--	'--	30	'--	'--	'--	'--	'--	'--	'--	'--	FALSE	'--	'--	false	'--	'--	'--	Blood Derived Normal	10	'--	released	'--	'--	'--	Not Reported	'--	'--	'--
TCGA-THCA	2501ee46-8d38-448b-8765-e9c9706cbbe8	TCGA-BJ-A191	c92fc4e3-7a96-4000-a969-aa894ca58a33	TCGA-BJ-A191-01A	'--	'--	'--	'--	'--	30	'--	'--	'--	'--	'--	'--	340.0	'--	FALSE	'--	'--	true	'--	B78E5312-059F-441C-8C8D-932FA38812D3	'--	Primary Tumor	1	'--	released	'--	'--	'--	Not Reported	'--	'--	'--
TCGA-THCA	2501ee46-8d38-448b-8765-e9c9706cbbe8	TCGA-BJ-A191	1fb19219-84da-4a64-bb9e-9ac771363bda	TCGA-BJ-A191-01Z	'--	'--	'--	'--	'--	'--	0	'--	'--	'--	'--	'--	'--	'--	TRUE	'--	'--	No	'--	'--	FFPE	Primary Tumor	1	'--	released	'--	'--	'--	Not Reported	'--	'--	'--
TCGA-THCA	f12fa57b-3427-45fe-994b-602f498b68da	TCGA-E8-A438	3764990a-b3ad-422f-87a2-8d26250fd2e7	TCGA-E8-A438-10B	'--	'--	'--	'--	'--	271	'--	'--	'--	'--	'--	'--	'--	'--	FALSE	'--	'--	false	'--	'--	'--	Blood Derived Normal	10	'--	released	'--	'--	'--	Not Reported	'--	'--	'--
TCGA-THCA	f12fa57b-3427-45fe-994b-602f498b68da	TCGA-E8-A438	18761057-8d3e-4494-be02-a1c5d5650c00	TCGA-E8-A438-01A	'--	'--	'--	'--	'--	271	'--	'--	'--	'--	'--	'--	290.0	'--	FALSE	'--	'--	true	'--	F5A6C80F-594B-4FD3-9B9F-E0AB0D7F7EDE	'--	Primary Tumor	1	'--	released	'--	'--	'--	Not Reported	'--	'--	'--
TCGA-THCA	f12fa57b-3427-45fe-994b-602f498b68da	TCGA-E8-A438	91b26658-f99c-46d7-a427-9fc03e43ea71	TCGA-E8-A438-01Z	'--	'--	'--	'--	'--	'--	0	'--	'--	'--	'--	'--	'--	'--	TRUE	'--	'--	No	'--	'--	FFPE	Primary Tumor	1	'--	released	'--	'--	'--	Not Reported	'--	'--	'--
TCGA-THCA	10bdafbb-831d-48b5-b9a3-ad374fc50235	TCGA-FE-A3PA	2ea1511a-4d63-4099-92aa-63e7fb9d320e	TCGA-FE-A3PA-01Z	'--	'--	'--	'--	'--	'--	0	'--	'--	'--	'--	'--	'--	'--	TRUE	'--	'--	No	'--	'--	FFPE	Primary Tumor	1	'--	released	'--	'--	'--	Not Reported	'--	'--	'--
TCGA-THCA	10bdafbb-831d-48b5-b9a3-ad374fc50235	TCGA-FE-A3PA	ccea50a0-b282-4bfe-8a65-281c8cca75b9	TCGA-FE-A3PA-10A	'--	'--	'--	'--	'--	3514	'--	'--	'--	'--	'--	'--	'--	'--	FALSE	'--	'--	false	'--	'--	'--	Blood Derived Normal	10	'--	released	'--	'--	'--	Not Reported	'--	'--	'--
TCGA-THCA	10bdafbb-831d-48b5-b9a3-ad374fc50235	TCGA-FE-A3PA	d37bed2a-bf63-43e0-91d0-6c95e4ca2d45	TCGA-FE-A3PA-01A	'--	'--	'--	'--	'--	3514	'--	'--	'--	'--	'--	'--	70.0	'--	FALSE	'--	'--	true	'--	7FA0F656-75E1-4D38-95C3-6E77F30AEADC	'--	Primary Tumor	1	'--	released	'--	'--	'--	Not Reported	'--	'--	'--
TCGA-THCA	a2e2fac3-cca5-4e33-aa6c-1d9d3ac3aeec	TCGA-E8-A419	6bc1841d-af9f-48d0-add9-d1c4a62cad20	TCGA-E8-A419-10A	'--	'--	'--	'--	'--	125	'--	'--	'--	'--	'--	'--	'--	'--	FALSE	'--	'--	false	'--	'--	'--	Blood Derived Normal	10	'--	released	'--	'--	'--	Not Reported	'--	'--	'--
TCGA-THCA	a2e2fac3-cca5-4e33-aa6c-1d9d3ac3aeec	TCGA-E8-A419	4d2a2145-0ce9-4ecd-a5d6-3e718528ea8d	TCGA-E8-A419-01Z	'--	'--	'--	'--	'--	'--	0	'--	'--	'--	'--	'--	'--	'--	TRUE	'--	'--	No	'--	'--	FFPE	Primary Tumor	1	'--	released	'--	'--	'--	Not Reported	'--	'--	'--
TCGA-THCA	a2e2fac3-cca5-4e33-aa6c-1d9d3ac3aeec	TCGA-E8-A419	c7b4058e-21b2-4e6b-8fff-e1981583b9ce	TCGA-E8-A419-01A	'--	'--	'--	'--	'--	125	'--	'--	'--	'--	'--	'--	820.0	'--	FALSE	'--	'--	true	'--	96AD2BE9-B8DF-4696-BD0F-61FA2CA60871	'--	Primary Tumor	1	'--	released	'--	'--	'--	Not Reported	'--	'--	'--
TCGA-THCA	ca65a38e-8b49-4b50-908a-478b95b95c02	TCGA-EL-A3GW	a6e7437b-6707-4fda-bbc0-3f6efbc04fc2	TCGA-EL-A3GW-01A	'--	'--	'--	'--	'--	919	'--	'--	'--	'--	'--	'--	240.0	'--	FALSE	'--	'--	false	'--	9093C3DC-F933-4705-86BF-9CA24A98C624	'--	Primary Tumor	1	'--	released	'--	'--	'--	Not Reported	'--	'--	'--
TCGA-THCA	ca65a38e-8b49-4b50-908a-478b95b95c02	TCGA-EL-A3GW	a9b66379-d802-431c-a33e-938c3c8fdb42	TCGA-EL-A3GW-10A	'--	'--	'--	'--	'--	919	'--	'--	'--	'--	'--	'--	'--	'--	FALSE	'--	'--	false	'--	'--	'--	Blood Derived Normal	10	'--	released	'--	'--	'--	Not Reported	'--	'--	'--
TCGA-THCA	ca65a38e-8b49-4b50-908a-478b95b95c02	TCGA-EL-A3GW	f16224e6-e404-41b8-8e7e-9278eb1ed30a	TCGA-EL-A3GW-01Z	'--	'--	'--	'--	'--	'--	0	'--	'--	'--	'--	'--	'--	'--	TRUE	'--	'--	No	'--	'--	FFPE	Primary Tumor	1	'--	released	'--	'--	'--	Not Reported	'--	'--	'--
TCGA-THCA	3cd2d4bd-8256-42fa-8272-db379d598007	TCGA-BJ-A290	c84f79ef-c51a-4627-a58c-e8e1f226ce7f	TCGA-BJ-A290-01A	'--	'--	'--	'--	'--	486	'--	'--	'--	'--	'--	'--	440.0	'--	FALSE	'--	'--	true	'--	270D1C48-B0EE-40AD-8E01-D8567CAC896D	'--	Primary Tumor	1	'--	released	'--	'--	'--	Not Reported	'--	'--	'--
TCGA-THCA	3cd2d4bd-8256-42fa-8272-db379d598007	TCGA-BJ-A290	bf20a894-0f12-44d4-9e12-c41f65e28b87	TCGA-BJ-A290-11A	'--	'--	'--	'--	'--	486	'--	'--	'--	'--	'--	'--	170.0	'--	FALSE	'--	'--	true	'--	'--	'--	Solid Tissue Normal	11	'--	released	'--	'--	'--	Not Reported	'--	'--	'--
TCGA-THCA	3cd2d4bd-8256-42fa-8272-db379d598007	TCGA-BJ-A290	3e614421-a679-491d-b055-c41d4d1809e3	TCGA-BJ-A290-10A	'--	'--	'--	'--	'--	486	'--	'--	'--	'--	'--	'--	'--	'--	FALSE	'--	'--	false	'--	'--	'--	Blood Derived Normal	10	'--	released	'--	'--	'--	Not Reported	'--	'--	'--
TCGA-THCA	3cd2d4bd-8256-42fa-8272-db379d598007	TCGA-BJ-A290	1e186bf1-6a2f-4160-9228-5ba0b720bca7	TCGA-BJ-A290-01Z	'--	'--	'--	'--	'--	'--	0	'--	'--	'--	'--	'--	'--	'--	TRUE	'--	'--	No	'--	'--	FFPE	Primary Tumor	1	'--	released	'--	'--	'--	Not Reported	'--	'--	'--
TCGA-THCA	866ca8ad-adc9-45d4-ad92-9f8f1a161ddf	TCGA-BJ-A0ZH	5b7a0df5-39fe-4d79-8d47-0f1714872513	TCGA-BJ-A0ZH-10A	'--	'--	'--	'--	'--	89	'--	'--	'--	'--	'--	'--	'--	'--	FALSE	'--	'--	false	'--	'--	'--	Blood Derived Normal	10	'--	released	'--	'--	'--	Not Reported	'--	'--	'--
TCGA-THCA	866ca8ad-adc9-45d4-ad92-9f8f1a161ddf	TCGA-BJ-A0ZH	01ee736b-f907-465b-9142-c50be0a3461b	TCGA-BJ-A0ZH-01A	'--	'--	'--	'--	'--	89	'--	'--	'--	'--	'--	'--	90.0	'--	FALSE	'--	'--	true	'--	D3BBEAC7-490C-4CF3-AB2A-966DB9531A41	'--	Primary Tumor	1	'--	released	'--	'--	'--	Not Reported	'--	'--	'--
TCGA-THCA	866ca8ad-adc9-45d4-ad92-9f8f1a161ddf	TCGA-BJ-A0ZH	9a9f8fda-3de0-43ed-94a8-f99f8d054b8a	TCGA-BJ-A0ZH-01Z	'--	'--	'--	'--	'--	'--	0	'--	'--	'--	'--	'--	'--	'--	TRUE	'--	'--	No	'--	'--	FFPE	Primary Tumor	1	'--	released	'--	'--	'--	Not Reported	'--	'--	'--
TCGA-THCA	b55375c3-9ef2-4d2f-9c29-224e746931c4	TCGA-BJ-A192	4e667dbc-aed4-46cf-b7e9-5f380b5ff07f	TCGA-BJ-A192-10A	'--	'--	'--	'--	'--	154	'--	'--	'--	'--	'--	'--	'--	'--	FALSE	'--	'--	false	'--	'--	'--	Blood Derived Normal	10	'--	released	'--	'--	'--	Not Reported	'--	'--	'--
TCGA-THCA	b55375c3-9ef2-4d2f-9c29-224e746931c4	TCGA-BJ-A192	928d517c-3bb6-46c7-a673-799d3603a66f	TCGA-BJ-A192-01Z	'--	'--	'--	'--	'--	'--	0	'--	'--	'--	'--	'--	'--	'--	TRUE	'--	'--	No	'--	'--	FFPE	Primary Tumor	1	'--	released	'--	'--	'--	Not Reported	'--	'--	'--
TCGA-THCA	b55375c3-9ef2-4d2f-9c29-224e746931c4	TCGA-BJ-A192	582c3030-1f23-4535-9c8b-6b594e656af4	TCGA-BJ-A192-01A	'--	'--	'--	'--	'--	154	'--	'--	'--	'--	'--	'--	230.0	'--	FALSE	'--	'--	true	'--	84EC1EDD-A480-49F7-905F-8906B7760A94	'--	Primary Tumor	1	'--	released	'--	'--	'--	Not Reported	'--	'--	'--
TCGA-THCA	6abc861a-376d-446b-acee-fb0f03a82c09	TCGA-EM-A22O	5a8265d8-f0cc-4198-885c-464c671d9c9e	TCGA-EM-A22O-10A	'--	'--	'--	'--	'--	126	'--	'--	'--	'--	'--	'--	'--	'--	FALSE	'--	'--	false	'--	'--	'--	Blood Derived Normal	10	'--	released	'--	'--	'--	Not Reported	'--	'--	'--
TCGA-THCA	6abc861a-376d-446b-acee-fb0f03a82c09	TCGA-EM-A22O	aacf33bd-95ce-40fd-9828-1e78cbbb0e1b	TCGA-EM-A22O-01A	'--	'--	'--	'--	'--	42	'--	'--	'--	'--	'--	'--	130.0	'--	FALSE	'--	'--	false	'--	3D5E6A4E-1626-414F-91BC-009A03C57016	'--	Primary Tumor	1	'--	released	'--	'--	'--	Not Reported	'--	'--	'--
TCGA-THCA	6abc861a-376d-446b-acee-fb0f03a82c09	TCGA-EM-A22O	fd775f18-5567-4207-9e59-d058f2402a6f	TCGA-EM-A22O-01Z	'--	'--	'--	'--	'--	'--	0	'--	'--	'--	'--	'--	'--	'--	TRUE	'--	'--	No	'--	'--	FFPE	Primary Tumor	1	'--	released	'--	'--	'--	Not Reported	'--	'--	'--
TCGA-THCA	0cafefef-911b-46e8-9e6c-19a0e7d555aa	TCGA-ET-A3DO	25f6dc85-1248-4494-bc54-266e3744550e	TCGA-ET-A3DO-10A	'--	'--	'--	'--	'--	2339	'--	'--	'--	'--	'--	'--	'--	'--	FALSE	'--	'--	false	'--	'--	'--	Blood Derived Normal	10	'--	released	'--	'--	'--	Not Reported	'--	'--	'--
TCGA-THCA	0cafefef-911b-46e8-9e6c-19a0e7d555aa	TCGA-ET-A3DO	0ae7e75a-9fd4-48ff-a0de-bd2032543f3e	TCGA-ET-A3DO-01A	'--	'--	'--	'--	'--	2339	'--	'--	'--	'--	'--	'--	130.0	'--	FALSE	'--	'--	true	'--	25667964-D12A-43A9-8B5E-DDBFDB694D74	'--	Primary Tumor	1	'--	released	'--	'--	'--	Not Reported	'--	'--	'--
TCGA-THCA	0cafefef-911b-46e8-9e6c-19a0e7d555aa	TCGA-ET-A3DO	de5cfc6b-3512-4bc3-8d7b-de1aa84ab757	TCGA-ET-A3DO-01Z	'--	'--	'--	'--	'--	'--	0	'--	'--	'--	'--	'--	'--	'--	TRUE	'--	'--	No	'--	'--	FFPE	Primary Tumor	1	'--	released	'--	'--	'--	Not Reported	'--	'--	'--
TCGA-THCA	7d818f01-49a6-4ba8-9f1c-c77398adbdd0	TCGA-ET-A2N5	8c0d7132-c75c-4c0a-a1a2-b3e357b1c006	TCGA-ET-A2N5-01Z	'--	'--	'--	'--	'--	'--	0	'--	'--	'--	'--	'--	'--	'--	TRUE	'--	'--	No	'--	'--	FFPE	Primary Tumor	1	'--	released	'--	'--	'--	Not Reported	'--	'--	'--
TCGA-THCA	7d818f01-49a6-4ba8-9f1c-c77398adbdd0	TCGA-ET-A2N5	9632923b-6540-4f0f-918b-ec1926eb1a98	TCGA-ET-A2N5-01A	'--	'--	'--	'--	'--	1190	'--	'--	'--	'--	'--	'--	360.0	'--	FALSE	'--	'--	true	'--	ED2E0C13-EB17-4947-995A-C3CFDA4F71E6	'--	Primary Tumor	1	'--	released	'--	'--	'--	Not Reported	'--	'--	'--
TCGA-THCA	7d818f01-49a6-4ba8-9f1c-c77398adbdd0	TCGA-ET-A2N5	74ceb538-ad66-49dc-81a2-6867efe79634	TCGA-ET-A2N5-11B	'--	'--	'--	'--	'--	1211	'--	'--	'--	'--	'--	'--	70.0	'--	FALSE	'--	'--	true	'--	'--	'--	Solid Tissue Normal	11	'--	released	'--	'--	'--	Not Reported	'--	'--	'--
TCGA-THCA	c047e741-2b29-45df-a577-351bddc50eb8	TCGA-ET-A3DU	90c331cc-2074-4f10-8ddb-daeedde8bcbf	TCGA-ET-A3DU-01A	'--	'--	'--	'--	'--	665	'--	'--	'--	'--	'--	'--	80.0	'--	FALSE	'--	'--	true	'--	6AB7842E-8DC5-458A-8AE0-AE429E095DCA	'--	Primary Tumor	1	'--	released	'--	'--	'--	Not Reported	'--	'--	'--
TCGA-THCA	c047e741-2b29-45df-a577-351bddc50eb8	TCGA-ET-A3DU	a4478a22-aa77-4fc8-a6de-27aa04f88daa	TCGA-ET-A3DU-01Z	'--	'--	'--	'--	'--	'--	0	'--	'--	'--	'--	'--	'--	'--	TRUE	'--	'--	No	'--	'--	FFPE	Primary Tumor	1	'--	released	'--	'--	'--	Not Reported	'--	'--	'--
TCGA-THCA	c047e741-2b29-45df-a577-351bddc50eb8	TCGA-ET-A3DU	cea9208a-84ac-46bd-a46c-6f5ec13fd66d	TCGA-ET-A3DU-10A	'--	'--	'--	'--	'--	665	'--	'--	'--	'--	'--	'--	'--	'--	FALSE	'--	'--	false	'--	'--	'--	Blood Derived Normal	10	'--	released	'--	'--	'--	Not Reported	'--	'--	'--
TCGA-THCA	e94dfd42-4fe4-48e9-aa62-422ae071413f	TCGA-KS-A4I5	cb9ff54b-a410-4162-8470-4ecaf8b12847	TCGA-KS-A4I5-11A	'--	'--	'--	'--	'--	315	'--	'--	'--	'--	'--	'--	60.0	'--	FALSE	'--	'--	false	'--	'--	'--	Solid Tissue Normal	11	'--	released	'--	'--	'--	Not Reported	'--	'--	'--
TCGA-THCA	e94dfd42-4fe4-48e9-aa62-422ae071413f	TCGA-KS-A4I5	bea95b8e-7dcb-4025-bc2c-c8f168354716	TCGA-KS-A4I5-01Z	'--	'--	'--	'--	'--	'--	0	'--	'--	'--	'--	'--	'--	'--	TRUE	'--	'--	No	'--	'--	FFPE	Primary Tumor	1	'--	released	'--	'--	'--	Not Reported	'--	'--	'--
TCGA-THCA	e94dfd42-4fe4-48e9-aa62-422ae071413f	TCGA-KS-A4I5	402bd26a-e355-48c9-9b39-fbb99fb2366a	TCGA-KS-A4I5-01A	'--	'--	'--	'--	'--	315	'--	'--	'--	'--	'--	'--	110.0	'--	FALSE	'--	'--	false	'--	801C7861-F776-44D4-A594-4303B4F8A3F7	'--	Primary Tumor	1	'--	released	'--	'--	'--	Not Reported	'--	'--	'--
TCGA-THCA	d5932dd7-b777-427f-8b55-3ec369fd76a3	TCGA-EM-A3ST	f410efaf-80dd-4c07-9ae6-fb7969761f00	TCGA-EM-A3ST-01A	'--	'--	'--	'--	'--	224	'--	'--	'--	'--	'--	'--	100.0	'--	FALSE	'--	'--	false	'--	1056960E-3020-440D-976D-B29BFCC93991	'--	Primary Tumor	1	'--	released	'--	'--	'--	Not Reported	'--	'--	'--
TCGA-THCA	d5932dd7-b777-427f-8b55-3ec369fd76a3	TCGA-EM-A3ST	39c4a006-0d88-4f2b-b0aa-d80266b12592	TCGA-EM-A3ST-01Z	'--	'--	'--	'--	'--	'--	0	'--	'--	'--	'--	'--	'--	'--	TRUE	'--	'--	No	'--	'--	FFPE	Primary Tumor	1	'--	released	'--	'--	'--	Not Reported	'--	'--	'--
TCGA-THCA	d5932dd7-b777-427f-8b55-3ec369fd76a3	TCGA-EM-A3ST	be8b9f7c-5bf7-43b4-9e3f-5a2fff8c72ab	TCGA-EM-A3ST-11A	'--	'--	'--	'--	'--	281	'--	'--	'--	'--	'--	'--	60.0	'--	FALSE	'--	'--	false	'--	'--	'--	Solid Tissue Normal	11	'--	released	'--	'--	'--	Not Reported	'--	'--	'--
TCGA-THCA	d487536f-0521-4d42-9150-6a806ae00241	TCGA-DJ-A2PW	9c901812-83b7-4c45-a60a-5201fa0b0c10	TCGA-DJ-A2PW-10A	'--	'--	'--	'--	'--	145	'--	'--	'--	'--	'--	'--	'--	'--	FALSE	'--	'--	false	'--	'--	'--	Blood Derived Normal	10	'--	released	'--	'--	'--	Not Reported	'--	'--	'--
TCGA-THCA	d487536f-0521-4d42-9150-6a806ae00241	TCGA-DJ-A2PW	dec2aed1-d565-4384-8078-4f06b1022aba	TCGA-DJ-A2PW-01Z	'--	'--	'--	'--	'--	'--	0	'--	'--	'--	'--	'--	'--	'--	TRUE	'--	'--	No	'--	'--	FFPE	Primary Tumor	1	'--	released	'--	'--	'--	Not Reported	'--	'--	'--
TCGA-THCA	d487536f-0521-4d42-9150-6a806ae00241	TCGA-DJ-A2PW	d9ec9029-be41-43d5-a134-6a0416b01ab7	TCGA-DJ-A2PW-01A	'--	'--	'--	'--	'--	145	'--	'--	'--	'--	'--	'--	370.0	'--	FALSE	'--	'--	true	'--	AED8092A-40A2-4376-AB04-8D31896D7FE5	'--	Primary Tumor	1	'--	released	'--	'--	'--	Not Reported	'--	'--	'--
TCGA-THCA	5d0cc336-26f2-4cb0-aa9e-58491dda102f	TCGA-EL-A3D4	9bf280c2-c7b7-4aa5-9480-7a1cfa10e465	TCGA-EL-A3D4-10A	'--	'--	'--	'--	'--	1080	'--	'--	'--	'--	'--	'--	'--	'--	FALSE	'--	'--	false	'--	'--	'--	Blood Derived Normal	10	'--	released	'--	'--	'--	Not Reported	'--	'--	'--
TCGA-THCA	5d0cc336-26f2-4cb0-aa9e-58491dda102f	TCGA-EL-A3D4	45cd4775-799b-4894-82d5-2b887fdc7262	TCGA-EL-A3D4-01A	'--	'--	'--	'--	'--	1080	'--	'--	'--	'--	'--	'--	240.0	'--	FALSE	'--	'--	true	'--	4C9E1ABE-DAB5-4935-AD52-187F4EABA7EA	'--	Primary Tumor	1	'--	released	'--	'--	'--	Not Reported	'--	'--	'--
TCGA-THCA	5d0cc336-26f2-4cb0-aa9e-58491dda102f	TCGA-EL-A3D4	48ea877b-75d8-4d69-815d-69b2fb9551db	TCGA-EL-A3D4-01Z	'--	'--	'--	'--	'--	'--	0	'--	'--	'--	'--	'--	'--	'--	TRUE	'--	'--	No	'--	'--	FFPE	Primary Tumor	1	'--	released	'--	'--	'--	Not Reported	'--	'--	'--
TCGA-THCA	59e91fe5-c80f-4915-be0f-1a7cd3f31f3e	TCGA-BJ-A28S	59e396cb-65b0-4db8-822e-918231f69234	TCGA-BJ-A28S-01A	'--	'--	'--	'--	'--	150	'--	'--	'--	'--	'--	'--	170.0	'--	FALSE	'--	'--	true	'--	65955922-11C7-4627-BE4B-EDF0886B86B4	'--	Primary Tumor	1	'--	released	'--	'--	'--	Not Reported	'--	'--	'--
TCGA-THCA	59e91fe5-c80f-4915-be0f-1a7cd3f31f3e	TCGA-BJ-A28S	83499d6e-0da8-485b-944f-c5acf31e68d5	TCGA-BJ-A28S-10A	'--	'--	'--	'--	'--	150	'--	'--	'--	'--	'--	'--	'--	'--	FALSE	'--	'--	false	'--	'--	'--	Blood Derived Normal	10	'--	released	'--	'--	'--	Not Reported	'--	'--	'--
TCGA-THCA	59e91fe5-c80f-4915-be0f-1a7cd3f31f3e	TCGA-BJ-A28S	8f636ad1-175d-4d32-8c9d-a33903eccaa5	TCGA-BJ-A28S-01Z	'--	'--	'--	'--	'--	'--	0	'--	'--	'--	'--	'--	'--	'--	TRUE	'--	'--	No	'--	'--	FFPE	Primary Tumor	1	'--	released	'--	'--	'--	Not Reported	'--	'--	'--
TCGA-THCA	258dccee-a3ce-4d4b-a60c-64f45ebfb7ad	TCGA-EL-A3CR	f2e5d5e2-b371-4f26-a16a-3337982bd5b0	TCGA-EL-A3CR-01Z	'--	'--	'--	'--	'--	'--	0	'--	'--	'--	'--	'--	'--	'--	TRUE	'--	'--	No	'--	'--	FFPE	Primary Tumor	1	'--	released	'--	'--	'--	Not Reported	'--	'--	'--
TCGA-THCA	258dccee-a3ce-4d4b-a60c-64f45ebfb7ad	TCGA-EL-A3CR	e14b2d4a-6357-43eb-8129-6a3225982b92	TCGA-EL-A3CR-10A	'--	'--	'--	'--	'--	3278	'--	'--	'--	'--	'--	'--	'--	'--	FALSE	'--	'--	false	'--	'--	'--	Blood Derived Normal	10	'--	released	'--	'--	'--	Not Reported	'--	'--	'--
TCGA-THCA	258dccee-a3ce-4d4b-a60c-64f45ebfb7ad	TCGA-EL-A3CR	bbd33641-b868-49f3-a424-aa321f29e5cd	TCGA-EL-A3CR-01A	'--	'--	'--	'--	'--	3278	'--	'--	'--	'--	'--	'--	230.0	'--	FALSE	'--	'--	true	'--	8435621F-F2C1-492A-A3E8-E6FAE9BD4351	'--	Primary Tumor	1	'--	released	'--	'--	'--	Not Reported	'--	'--	'--
TCGA-THCA	47bde6dd-fa41-4d1b-8b20-2a5a5cdb2769	TCGA-EM-A3AK	9454b3aa-e858-47fe-a0f4-21a7a835db23	TCGA-EM-A3AK-10A	'--	'--	'--	'--	'--	227	'--	'--	'--	'--	'--	'--	'--	'--	FALSE	'--	'--	false	'--	'--	'--	Blood Derived Normal	10	'--	released	'--	'--	'--	Not Reported	'--	'--	'--
TCGA-THCA	47bde6dd-fa41-4d1b-8b20-2a5a5cdb2769	TCGA-EM-A3AK	26053b33-36c4-40ce-be2f-0a2e1b3e9fee	TCGA-EM-A3AK-01Z	'--	'--	'--	'--	'--	'--	0	'--	'--	'--	'--	'--	'--	'--	TRUE	'--	'--	No	'--	'--	FFPE	Primary Tumor	1	'--	released	'--	'--	'--	Not Reported	'--	'--	'--
TCGA-THCA	47bde6dd-fa41-4d1b-8b20-2a5a5cdb2769	TCGA-EM-A3AK	7cb9d32c-5992-4f89-8e15-33a7b9cc1312	TCGA-EM-A3AK-01A	'--	'--	'--	'--	'--	170	'--	'--	'--	'--	'--	'--	80.0	'--	FALSE	'--	'--	false	'--	8A05B9C2-42A1-4200-8EB9-8BA20242B7C6	'--	Primary Tumor	1	'--	released	'--	'--	'--	Not Reported	'--	'--	'--
TCGA-THCA	085ffcdc-8600-42e2-852a-506465f716a2	TCGA-DE-A3KN	620b21c9-ac06-4154-a941-2532c775c6d8	TCGA-DE-A3KN-01A	'--	'--	'--	'--	'--	183	'--	'--	'--	'--	'--	'--	200.0	'--	FALSE	'--	'--	false	'--	C486F0BE-B25C-4108-81C5-AAC6B64346A0	'--	Primary Tumor	1	'--	released	'--	'--	'--	Not Reported	'--	'--	'--
TCGA-THCA	085ffcdc-8600-42e2-852a-506465f716a2	TCGA-DE-A3KN	96697361-60d1-4397-983d-dfc8ca6f805c	TCGA-DE-A3KN-01Z	'--	'--	'--	'--	'--	'--	0	'--	'--	'--	'--	'--	'--	'--	TRUE	'--	'--	No	'--	'--	FFPE	Primary Tumor	1	'--	released	'--	'--	'--	Not Reported	'--	'--	'--
TCGA-THCA	085ffcdc-8600-42e2-852a-506465f716a2	TCGA-DE-A3KN	fdfc1873-3d5e-46cb-a929-8c9f4b1697d6	TCGA-DE-A3KN-10A	'--	'--	'--	'--	'--	183	'--	'--	'--	'--	'--	'--	'--	'--	FALSE	'--	'--	false	'--	'--	'--	Blood Derived Normal	10	'--	released	'--	'--	'--	Not Reported	'--	'--	'--
TCGA-THCA	dde7ade8-de24-467f-855d-a422bbede407	TCGA-EL-A3GU	5d1ca75d-03f8-455a-b30e-f3d6ed188433	TCGA-EL-A3GU-11A	'--	'--	'--	'--	'--	3486	'--	'--	'--	'--	'--	'--	250.0	'--	FALSE	'--	'--	false	'--	'--	'--	Solid Tissue Normal	11	'--	released	'--	'--	'--	Not Reported	'--	'--	'--
TCGA-THCA	dde7ade8-de24-467f-855d-a422bbede407	TCGA-EL-A3GU	adb988d4-2513-45c9-aa81-56b1feaa2958	TCGA-EL-A3GU-01A	'--	'--	'--	'--	'--	3486	'--	'--	'--	'--	'--	'--	220.0	'--	FALSE	'--	'--	false	'--	2D5EF0A8-A5A1-4C28-A723-F2127A834AB6	'--	Primary Tumor	1	'--	released	'--	'--	'--	Not Reported	'--	'--	'--
TCGA-THCA	dde7ade8-de24-467f-855d-a422bbede407	TCGA-EL-A3GU	7860675c-1261-47ed-b611-d50a15b752a6	TCGA-EL-A3GU-01Z	'--	'--	'--	'--	'--	'--	0	'--	'--	'--	'--	'--	'--	'--	TRUE	'--	'--	No	'--	'--	FFPE	Primary Tumor	1	'--	released	'--	'--	'--	Not Reported	'--	'--	'--
TCGA-THCA	511b5f28-709b-4e43-9efd-b2f425bba962	TCGA-EM-A4FQ	3497a620-43ac-4600-94ef-320139faf49e	TCGA-EM-A4FQ-10A	'--	'--	'--	'--	'--	178	'--	'--	'--	'--	'--	'--	'--	'--	FALSE	'--	'--	false	'--	'--	'--	Blood Derived Normal	10	'--	released	'--	'--	'--	Not Reported	'--	'--	'--
TCGA-THCA	511b5f28-709b-4e43-9efd-b2f425bba962	TCGA-EM-A4FQ	b6fcefaa-2e33-4e15-b061-b14638c58a6c	TCGA-EM-A4FQ-01A	'--	'--	'--	'--	'--	178	'--	'--	'--	'--	'--	'--	70.0	'--	FALSE	'--	'--	false	'--	61E917B8-556F-4BA7-916D-1D8295FCB2EE	'--	Primary Tumor	1	'--	released	'--	'--	'--	Not Reported	'--	'--	'--
TCGA-THCA	511b5f28-709b-4e43-9efd-b2f425bba962	TCGA-EM-A4FQ	2ff09f77-31eb-4221-9f5c-7ba383993804	TCGA-EM-A4FQ-01Z	'--	'--	'--	'--	'--	'--	0	'--	'--	'--	'--	'--	'--	'--	TRUE	'--	'--	No	'--	'--	FFPE	Primary Tumor	1	'--	released	'--	'--	'--	Not Reported	'--	'--	'--
TCGA-THCA	acb3b9db-16e9-40f5-87a9-9df9d4ceee54	TCGA-BJ-A18Y	13867a18-2aa2-426c-a515-69aa1dabe296	TCGA-BJ-A18Y-10A	'--	'--	'--	'--	'--	163	'--	'--	'--	'--	'--	'--	'--	'--	FALSE	'--	'--	false	'--	'--	'--	Blood Derived Normal	10	'--	released	'--	'--	'--	Not Reported	'--	'--	'--
TCGA-THCA	acb3b9db-16e9-40f5-87a9-9df9d4ceee54	TCGA-BJ-A18Y	cbdd896f-e1d7-40e2-9853-0fc007f6457b	TCGA-BJ-A18Y-01Z	'--	'--	'--	'--	'--	'--	0	'--	'--	'--	'--	'--	'--	'--	TRUE	'--	'--	No	'--	'--	FFPE	Primary Tumor	1	'--	released	'--	'--	'--	Not Reported	'--	'--	'--
TCGA-THCA	acb3b9db-16e9-40f5-87a9-9df9d4ceee54	TCGA-BJ-A18Y	5d1d84d0-9a03-4381-9cf1-e460b3617aaa	TCGA-BJ-A18Y-01A	'--	'--	'--	'--	'--	163	'--	'--	'--	'--	'--	'--	100.0	'--	FALSE	'--	'--	true	'--	A36DAF35-DB45-47EA-B167-0B3A11D853C3	'--	Primary Tumor	1	'--	released	'--	'--	'--	Not Reported	'--	'--	'--
TCGA-THCA	b107b012-335a-4282-a7aa-273b740831f1	TCGA-EL-A3GR	e57fbfcf-f840-4eb8-a097-bf1050ee0a4b	TCGA-EL-A3GR-10A	'--	'--	'--	'--	'--	2746	'--	'--	'--	'--	'--	'--	'--	'--	FALSE	'--	'--	false	'--	'--	'--	Blood Derived Normal	10	'--	released	'--	'--	'--	Not Reported	'--	'--	'--
TCGA-THCA	b107b012-335a-4282-a7aa-273b740831f1	TCGA-EL-A3GR	12693f53-fa09-494c-82eb-bf735ea84e98	TCGA-EL-A3GR-01A	'--	'--	'--	'--	'--	2746	'--	'--	'--	'--	'--	'--	220.0	'--	FALSE	'--	'--	false	'--	F2945CC2-AEE4-45F7-A640-4174EB0D37FD	'--	Primary Tumor	1	'--	released	'--	'--	'--	Not Reported	'--	'--	'--
TCGA-THCA	b107b012-335a-4282-a7aa-273b740831f1	TCGA-EL-A3GR	a33621c0-322e-4bb8-ae25-644cc2ac0928	TCGA-EL-A3GR-01Z	'--	'--	'--	'--	'--	'--	0	'--	'--	'--	'--	'--	'--	'--	TRUE	'--	'--	No	'--	'--	FFPE	Primary Tumor	1	'--	released	'--	'--	'--	Not Reported	'--	'--	'--
TCGA-THCA	3dcee02c-a3d2-4188-a072-4d36c8a7e8fd	TCGA-ET-A2N4	619991fd-3583-4667-974b-15999e4d24b8	TCGA-ET-A2N4-01A	'--	'--	'--	'--	'--	1218	'--	'--	'--	'--	'--	'--	220.0	'--	FALSE	'--	'--	true	'--	76F3BFF3-8538-4736-85AB-2BEE2629F3BE	'--	Primary Tumor	1	'--	released	'--	'--	'--	Not Reported	'--	'--	'--
TCGA-THCA	3dcee02c-a3d2-4188-a072-4d36c8a7e8fd	TCGA-ET-A2N4	0580f792-b28a-47c4-9885-803c03605e22	TCGA-ET-A2N4-01Z	'--	'--	'--	'--	'--	'--	0	'--	'--	'--	'--	'--	'--	'--	TRUE	'--	'--	No	'--	'--	FFPE	Primary Tumor	1	'--	released	'--	'--	'--	Not Reported	'--	'--	'--
TCGA-THCA	3dcee02c-a3d2-4188-a072-4d36c8a7e8fd	TCGA-ET-A2N4	101dc60b-1f18-4917-acea-498948c99274	TCGA-ET-A2N4-10A	'--	'--	'--	'--	'--	1218	'--	'--	'--	'--	'--	'--	'--	'--	FALSE	'--	'--	false	'--	'--	'--	Blood Derived Normal	10	'--	released	'--	'--	'--	Not Reported	'--	'--	'--
TCGA-THCA	9dcaa676-10ca-48cb-b245-7cc4bd1fe9bb	TCGA-ET-A2N3	cf4f7c5c-fbb3-4bad-bc26-01519cc00540	TCGA-ET-A2N3-01B	'--	'--	'--	'--	'--	1556	'--	'--	'--	'--	'--	'--	190.0	'--	FALSE	'--	'--	true	'--	2C8DF5EC-3C30-4A19-AFDA-58A6FD94CFB8	'--	Primary Tumor	1	'--	released	'--	'--	'--	Not Reported	'--	'--	'--
TCGA-THCA	9dcaa676-10ca-48cb-b245-7cc4bd1fe9bb	TCGA-ET-A2N3	f257bacd-d365-408c-8919-027e14ca17b5	TCGA-ET-A2N3-01Z	'--	'--	'--	'--	'--	'--	0	'--	'--	'--	'--	'--	'--	'--	TRUE	'--	'--	No	'--	'--	FFPE	Primary Tumor	1	'--	released	'--	'--	'--	Not Reported	'--	'--	'--
TCGA-THCA	9dcaa676-10ca-48cb-b245-7cc4bd1fe9bb	TCGA-ET-A2N3	3d8edefa-3621-4283-af9f-c9b79f89fee2	TCGA-ET-A2N3-10A	'--	'--	'--	'--	'--	1205	'--	'--	'--	'--	'--	'--	'--	'--	FALSE	'--	'--	false	'--	'--	'--	Blood Derived Normal	10	'--	released	'--	'--	'--	Not Reported	'--	'--	'--
TCGA-THCA	2dcdf9a1-9437-4515-88c1-1c17d6b6418c	TCGA-DJ-A3V9	dec55d34-acc0-433b-8765-5900cf1b62ff	TCGA-DJ-A3V9-10A	'--	'--	'--	'--	'--	171	'--	'--	'--	'--	'--	'--	'--	'--	FALSE	'--	'--	false	'--	'--	'--	Blood Derived Normal	10	'--	released	'--	'--	'--	Not Reported	'--	'--	'--
TCGA-THCA	2dcdf9a1-9437-4515-88c1-1c17d6b6418c	TCGA-DJ-A3V9	a8b1d7aa-b856-4b9c-89f3-1a129add9a3d	TCGA-DJ-A3V9-01A	'--	'--	'--	'--	'--	171	'--	'--	'--	'--	'--	'--	170.0	'--	FALSE	'--	'--	true	'--	446397DB-BAEB-4EE7-B3EA-78CECD26266C	'--	Primary Tumor	1	'--	released	'--	'--	'--	Not Reported	'--	'--	'--
TCGA-THCA	2dcdf9a1-9437-4515-88c1-1c17d6b6418c	TCGA-DJ-A3V9	721c6c3f-bf89-40fc-b20a-75e1aa853bb0	TCGA-DJ-A3V9-01Z	'--	'--	'--	'--	'--	'--	0	'--	'--	'--	'--	'--	'--	'--	TRUE	'--	'--	No	'--	'--	FFPE	Primary Tumor	1	'--	released	'--	'--	'--	Not Reported	'--	'--	'--
TCGA-THCA	75a93f0e-cd41-43c6-a303-ff37e31395e9	TCGA-CE-A27D	313dece7-c2d9-4fd1-8b59-61766c1a2851	TCGA-CE-A27D-01Z	'--	'--	'--	'--	'--	'--	0	'--	'--	'--	'--	'--	'--	'--	TRUE	'--	'--	No	'--	'--	FFPE	Primary Tumor	1	'--	released	'--	'--	'--	Not Reported	'--	'--	'--
TCGA-THCA	75a93f0e-cd41-43c6-a303-ff37e31395e9	TCGA-CE-A27D	c850c70d-e86d-4f21-a6c3-62976a48033e	TCGA-CE-A27D-10A	'--	'--	'--	'--	'--	135	'--	'--	'--	'--	'--	'--	'--	'--	FALSE	'--	'--	false	'--	'--	'--	Blood Derived Normal	10	'--	released	'--	'--	'--	Not Reported	'--	'--	'--
TCGA-THCA	75a93f0e-cd41-43c6-a303-ff37e31395e9	TCGA-CE-A27D	1807ceee-28e1-4e8d-a1c4-6f6ad60ee310	TCGA-CE-A27D-01A	'--	'--	'--	'--	'--	135	'--	'--	'--	'--	'--	'--	280.0	'--	FALSE	'--	'--	true	'--	5261BBFC-934D-4929-BB25-1C5A49DAFB00	'--	Primary Tumor	1	'--	released	'--	'--	'--	Not Reported	'--	'--	'--
TCGA-THCA	9382942c-40dc-404a-ad8a-697612cdb575	TCGA-ET-A3BP	f2270524-8aa9-4a4d-9672-3b70d2e5c1d2	TCGA-ET-A3BP-01Z	'--	'--	'--	'--	'--	'--	0	'--	'--	'--	'--	'--	'--	'--	TRUE	'--	'--	No	'--	'--	FFPE	Primary Tumor	1	'--	released	'--	'--	'--	Not Reported	'--	'--	'--
TCGA-THCA	9382942c-40dc-404a-ad8a-697612cdb575	TCGA-ET-A3BP	0a6c3af8-7bc5-4b74-9fd0-202432dee89c	TCGA-ET-A3BP-01A	'--	'--	'--	'--	'--	1149	'--	'--	'--	'--	'--	'--	110.0	'--	FALSE	'--	'--	true	'--	111885BE-27BA-4EDA-9AAE-53308A6BE629	'--	Primary Tumor	1	'--	released	'--	'--	'--	Not Reported	'--	'--	'--
TCGA-THCA	9382942c-40dc-404a-ad8a-697612cdb575	TCGA-ET-A3BP	2fd19184-78a5-49c6-95cd-5468916fce20	TCGA-ET-A3BP-10A	'--	'--	'--	'--	'--	1149	'--	'--	'--	'--	'--	'--	'--	'--	FALSE	'--	'--	false	'--	'--	'--	Blood Derived Normal	10	'--	released	'--	'--	'--	Not Reported	'--	'--	'--
TCGA-THCA	4481d84d-109e-44a0-bcb4-e6e61bdce796	TCGA-ET-A25L	517cf62f-a089-4bbe-b398-1913dee1514f	TCGA-ET-A25L-10A	'--	'--	'--	'--	'--	399	'--	'--	'--	'--	'--	'--	'--	'--	FALSE	'--	'--	false	'--	'--	'--	Blood Derived Normal	10	'--	released	'--	'--	'--	Not Reported	'--	'--	'--
TCGA-THCA	4481d84d-109e-44a0-bcb4-e6e61bdce796	TCGA-ET-A25L	c8fe5ae7-b46b-4ea9-b064-06c113c078cc	TCGA-ET-A25L-01Z	'--	'--	'--	'--	'--	'--	0	'--	'--	'--	'--	'--	'--	'--	TRUE	'--	'--	No	'--	'--	FFPE	Primary Tumor	1	'--	released	'--	'--	'--	Not Reported	'--	'--	'--
TCGA-THCA	4481d84d-109e-44a0-bcb4-e6e61bdce796	TCGA-ET-A25L	7d90939f-bab7-4a39-8d57-79540142bb63	TCGA-ET-A25L-01A	'--	'--	'--	'--	'--	399	'--	'--	'--	'--	'--	'--	170.0	'--	FALSE	'--	'--	true	'--	16B69890-694B-4489-BF48-F1EDC6776C29	'--	Primary Tumor	1	'--	released	'--	'--	'--	Not Reported	'--	'--	'--
TCGA-THCA	fffdb1d9-58d1-425c-ac12-1e1e5f443bf7	TCGA-DJ-A4V0	a418a2e8-6a8d-4e7d-8c43-f09b521e51d8	TCGA-DJ-A4V0-01A	'--	'--	'--	'--	'--	236	'--	'--	'--	'--	'--	'--	300.0	'--	FALSE	'--	'--	true	'--	9807707B-9175-467A-A3F5-879E105129FC	'--	Primary Tumor	1	'--	released	'--	'--	'--	Not Reported	'--	'--	'--
TCGA-THCA	fffdb1d9-58d1-425c-ac12-1e1e5f443bf7	TCGA-DJ-A4V0	2e1b6386-91f7-4638-a660-ec0e69058386	TCGA-DJ-A4V0-01Z	'--	'--	'--	'--	'--	'--	0	'--	'--	'--	'--	'--	'--	'--	TRUE	'--	'--	No	'--	'--	FFPE	Primary Tumor	1	'--	released	'--	'--	'--	Not Reported	'--	'--	'--
TCGA-THCA	fffdb1d9-58d1-425c-ac12-1e1e5f443bf7	TCGA-DJ-A4V0	da65f49f-a0f4-48b7-b7a5-5e5fbad16c75	TCGA-DJ-A4V0-10A	'--	'--	'--	'--	'--	236	'--	'--	'--	'--	'--	'--	'--	'--	FALSE	'--	'--	false	'--	'--	'--	Blood Derived Normal	10	'--	released	'--	'--	'--	Not Reported	'--	'--	'--
TCGA-THCA	e62a728d-390f-428a-bea1-fc8c9814fb11	TCGA-CE-A484	5c575ffb-c093-408f-8cba-bf3c7e6e4609	TCGA-CE-A484-01A	'--	'--	'--	'--	'--	135	'--	'--	'--	'--	'--	'--	430.0	'--	FALSE	'--	'--	true	'--	273EB66C-5921-40B5-A4B8-8383EA27ED4B	'--	Primary Tumor	1	'--	released	'--	'--	'--	Not Reported	'--	'--	'--
TCGA-THCA	e62a728d-390f-428a-bea1-fc8c9814fb11	TCGA-CE-A484	f684ff7b-ea6b-409f-b2c6-f60f0d974f1a	TCGA-CE-A484-01Z	'--	'--	'--	'--	'--	'--	0	'--	'--	'--	'--	'--	'--	'--	TRUE	'--	'--	No	'--	'--	FFPE	Primary Tumor	1	'--	released	'--	'--	'--	Not Reported	'--	'--	'--
TCGA-THCA	e62a728d-390f-428a-bea1-fc8c9814fb11	TCGA-CE-A484	27a8008e-044a-4966-b518-cc6905e292ca	TCGA-CE-A484-10A	'--	'--	'--	'--	'--	135	'--	'--	'--	'--	'--	'--	'--	'--	FALSE	'--	'--	false	'--	'--	'--	Blood Derived Normal	10	'--	released	'--	'--	'--	Not Reported	'--	'--	'--
TCGA-THCA	dccba97d-4e81-42fb-93b3-90be68a034fb	TCGA-DJ-A1QE	144a8435-0f16-44a6-9651-71fb483ae5b7	TCGA-DJ-A1QE-10A	'--	'--	'--	'--	'--	2945	'--	'--	'--	'--	'--	'--	'--	'--	FALSE	'--	'--	false	'--	'--	'--	Blood Derived Normal	10	'--	released	'--	'--	'--	Not Reported	'--	'--	'--
TCGA-THCA	dccba97d-4e81-42fb-93b3-90be68a034fb	TCGA-DJ-A1QE	8645b9ba-f0a6-4fd3-bc88-0b0a6546a2e5	TCGA-DJ-A1QE-01Z	'--	'--	'--	'--	'--	'--	0	'--	'--	'--	'--	'--	'--	'--	TRUE	'--	'--	No	'--	'--	FFPE	Primary Tumor	1	'--	released	'--	'--	'--	Not Reported	'--	'--	'--
TCGA-THCA	dccba97d-4e81-42fb-93b3-90be68a034fb	TCGA-DJ-A1QE	e8bf40c4-8f4d-4032-b18b-d61a87a2dd1a	TCGA-DJ-A1QE-01A	'--	'--	'--	'--	'--	2945	'--	'--	'--	'--	'--	'--	150.0	'--	FALSE	'--	'--	true	'--	B7953E61-5047-4648-8A15-DE47510090BE	'--	Primary Tumor	1	'--	released	'--	'--	'--	Not Reported	'--	'--	'--
TCGA-THCA	de9315b3-b3df-45f0-adc2-69aa6b8ff717	TCGA-EM-A22K	52628004-5e08-488a-941e-921025b0c2d1	TCGA-EM-A22K-10A	'--	'--	'--	'--	'--	150	'--	'--	'--	'--	'--	'--	'--	'--	FALSE	'--	'--	false	'--	'--	'--	Blood Derived Normal	10	'--	released	'--	'--	'--	Not Reported	'--	'--	'--
TCGA-THCA	de9315b3-b3df-45f0-adc2-69aa6b8ff717	TCGA-EM-A22K	08d28f3e-5443-4e29-92c1-ad68e5a3cbfc	TCGA-EM-A22K-01Z	'--	'--	'--	'--	'--	'--	0	'--	'--	'--	'--	'--	'--	'--	TRUE	'--	'--	No	'--	'--	FFPE	Primary Tumor	1	'--	released	'--	'--	'--	Not Reported	'--	'--	'--
TCGA-THCA	de9315b3-b3df-45f0-adc2-69aa6b8ff717	TCGA-EM-A22K	8494ea4b-c009-4318-bff6-fbe9449f64ba	TCGA-EM-A22K-01A	'--	'--	'--	'--	'--	66	'--	'--	'--	'--	'--	'--	50.0	'--	FALSE	'--	'--	false	'--	8AB1176E-9808-44F0-B0DB-B9D3D5027025	'--	Primary Tumor	1	'--	released	'--	'--	'--	Not Reported	'--	'--	'--
TCGA-THCA	8d54a2ed-03f1-4a23-bdd2-f3395f5d3716	TCGA-EL-A3H1	9ed0332e-c846-4091-bf6e-0c5bf55b9f1a	TCGA-EL-A3H1-01A	'--	'--	'--	'--	'--	6870	'--	'--	'--	'--	'--	'--	210.0	'--	FALSE	'--	'--	false	'--	AA255733-E90D-43CF-AFE7-853B2CF70B42	'--	Primary Tumor	1	'--	released	'--	'--	'--	Not Reported	'--	'--	'--
TCGA-THCA	8d54a2ed-03f1-4a23-bdd2-f3395f5d3716	TCGA-EL-A3H1	39233590-43eb-4093-97e3-37db41ce8b8d	TCGA-EL-A3H1-01Z	'--	'--	'--	'--	'--	'--	0	'--	'--	'--	'--	'--	'--	'--	TRUE	'--	'--	No	'--	'--	FFPE	Primary Tumor	1	'--	released	'--	'--	'--	Not Reported	'--	'--	'--
TCGA-THCA	8d54a2ed-03f1-4a23-bdd2-f3395f5d3716	TCGA-EL-A3H1	8a84f2a6-d968-433b-ab28-c7892a869d38	TCGA-EL-A3H1-11A	'--	'--	'--	'--	'--	6870	'--	'--	'--	'--	'--	'--	180.0	'--	FALSE	'--	'--	false	'--	'--	'--	Solid Tissue Normal	11	'--	released	'--	'--	'--	Not Reported	'--	'--	'--
TCGA-THCA	274225cf-a0f4-4635-848b-819f479001de	TCGA-DJ-A4UQ	b5010a3f-f634-4094-a0ed-75c543c9da0f	TCGA-DJ-A4UQ-01A	'--	'--	'--	'--	'--	257	'--	'--	'--	'--	'--	'--	60.0	'--	FALSE	'--	'--	true	'--	66B80420-74AB-4AE4-B198-DB616D0484A6	'--	Primary Tumor	1	'--	released	'--	'--	'--	Not Reported	'--	'--	'--
TCGA-THCA	274225cf-a0f4-4635-848b-819f479001de	TCGA-DJ-A4UQ	b34f919e-ba26-4b38-a29e-57c79b5a360b	TCGA-DJ-A4UQ-10A	'--	'--	'--	'--	'--	257	'--	'--	'--	'--	'--	'--	'--	'--	FALSE	'--	'--	false	'--	'--	'--	Blood Derived Normal	10	'--	released	'--	'--	'--	Not Reported	'--	'--	'--
TCGA-THCA	274225cf-a0f4-4635-848b-819f479001de	TCGA-DJ-A4UQ	beb94c64-5bb0-4e99-a6c6-9eceb7093dbf	TCGA-DJ-A4UQ-01Z	'--	'--	'--	'--	'--	'--	0	'--	'--	'--	'--	'--	'--	'--	TRUE	'--	'--	No	'--	'--	FFPE	Primary Tumor	1	'--	released	'--	'--	'--	Not Reported	'--	'--	'--
TCGA-THCA	1005ccb2-10ef-4e37-950e-ad72393db03c	TCGA-ET-A25I	92a3f4b8-63f8-496c-8cb6-05d43a433d5b	TCGA-ET-A25I-01A	'--	'--	'--	'--	'--	1064	'--	'--	'--	'--	'--	'--	30.0	'--	FALSE	'--	'--	true	'--	94CB3835-0E2E-4187-A3D7-52F48537520E	'--	Primary Tumor	1	'--	released	'--	'--	'--	Not Reported	'--	'--	'--
TCGA-THCA	1005ccb2-10ef-4e37-950e-ad72393db03c	TCGA-ET-A25I	4d4d888f-6ffb-41c2-bbf8-97f3bfd20ab6	TCGA-ET-A25I-01Z	'--	'--	'--	'--	'--	'--	0	'--	'--	'--	'--	'--	'--	'--	TRUE	'--	'--	No	'--	'--	FFPE	Primary Tumor	1	'--	released	'--	'--	'--	Not Reported	'--	'--	'--
TCGA-THCA	1005ccb2-10ef-4e37-950e-ad72393db03c	TCGA-ET-A25I	16a484d2-8373-4d8e-821b-a30ae5baf577	TCGA-ET-A25I-10A	'--	'--	'--	'--	'--	1064	'--	'--	'--	'--	'--	'--	'--	'--	FALSE	'--	'--	false	'--	'--	'--	Blood Derived Normal	10	'--	released	'--	'--	'--	Not Reported	'--	'--	'--
TCGA-THCA	a65ec434-9ae0-453f-b440-08bf25558fd1	TCGA-EM-A2OW	4d6a2d9e-ec25-4040-a696-2d8d5d5c392e	TCGA-EM-A2OW-01A	'--	'--	'--	'--	'--	142	'--	'--	'--	'--	'--	'--	50.0	'--	FALSE	'--	'--	false	'--	2BFED855-C6EB-479B-A359-2BE4139D045A	'--	Primary Tumor	1	'--	released	'--	'--	'--	Not Reported	'--	'--	'--
TCGA-THCA	a65ec434-9ae0-453f-b440-08bf25558fd1	TCGA-EM-A2OW	2c8ccb7d-349e-4d05-80da-d5cf10adef2a	TCGA-EM-A2OW-10A	'--	'--	'--	'--	'--	234	'--	'--	'--	'--	'--	'--	'--	'--	FALSE	'--	'--	false	'--	'--	'--	Blood Derived Normal	10	'--	released	'--	'--	'--	Not Reported	'--	'--	'--
TCGA-THCA	a65ec434-9ae0-453f-b440-08bf25558fd1	TCGA-EM-A2OW	c96f4076-fea3-4d91-90f5-21c862dc57a3	TCGA-EM-A2OW-01Z	'--	'--	'--	'--	'--	'--	0	'--	'--	'--	'--	'--	'--	'--	TRUE	'--	'--	No	'--	'--	FFPE	Primary Tumor	1	'--	released	'--	'--	'--	Not Reported	'--	'--	'--
TCGA-THCA	b9e6a966-da7c-46f3-825f-8e19c06518c3	TCGA-EM-A2P2	3934ba56-d4f8-462d-98b1-d6f4e5c27dea	TCGA-EM-A2P2-10A	'--	'--	'--	'--	'--	170	'--	'--	'--	'--	'--	'--	'--	'--	FALSE	'--	'--	false	'--	'--	'--	Blood Derived Normal	10	'--	released	'--	'--	'--	Not Reported	'--	'--	'--
TCGA-THCA	b9e6a966-da7c-46f3-825f-8e19c06518c3	TCGA-EM-A2P2	22fe6d55-2f34-4145-9865-1f62c1f41aa5	TCGA-EM-A2P2-01A	'--	'--	'--	'--	'--	78	'--	'--	'--	'--	'--	'--	80.0	'--	FALSE	'--	'--	false	'--	7AEAFE55-1489-4795-B602-79587086D85B	'--	Primary Tumor	1	'--	released	'--	'--	'--	Not Reported	'--	'--	'--
TCGA-THCA	b9e6a966-da7c-46f3-825f-8e19c06518c3	TCGA-EM-A2P2	bc8cd1d4-e080-4769-8d68-51a36c94a5b1	TCGA-EM-A2P2-01Z	'--	'--	'--	'--	'--	'--	0	'--	'--	'--	'--	'--	'--	'--	TRUE	'--	'--	No	'--	'--	FFPE	Primary Tumor	1	'--	released	'--	'--	'--	Not Reported	'--	'--	'--
TCGA-THCA	a9d8f797-8a53-4be5-b957-0f1f6d080390	TCGA-BJ-A28T	49836675-e4db-4d7f-93f1-1ae0a0ab4b59	TCGA-BJ-A28T-01Z	'--	'--	'--	'--	'--	'--	0	'--	'--	'--	'--	'--	'--	'--	TRUE	'--	'--	No	'--	'--	FFPE	Primary Tumor	1	'--	released	'--	'--	'--	Not Reported	'--	'--	'--
TCGA-THCA	a9d8f797-8a53-4be5-b957-0f1f6d080390	TCGA-BJ-A28T	4ca4149a-e952-4a25-9163-8d4c15b09a62	TCGA-BJ-A28T-01A	'--	'--	'--	'--	'--	100	'--	'--	'--	'--	'--	'--	140.0	'--	FALSE	'--	'--	true	'--	B989C4A6-271C-4AC4-A55A-3011C7C6ED05	'--	Primary Tumor	1	'--	released	'--	'--	'--	Not Reported	'--	'--	'--
TCGA-THCA	a9d8f797-8a53-4be5-b957-0f1f6d080390	TCGA-BJ-A28T	a54f31c9-626e-4869-969d-65a61db2c932	TCGA-BJ-A28T-10A	'--	'--	'--	'--	'--	100	'--	'--	'--	'--	'--	'--	'--	'--	FALSE	'--	'--	false	'--	'--	'--	Blood Derived Normal	10	'--	released	'--	'--	'--	Not Reported	'--	'--	'--
TCGA-THCA	a9d8f797-8a53-4be5-b957-0f1f6d080390	TCGA-BJ-A28T	e5ff0da1-6d30-4606-a04c-159a2913458f	TCGA-BJ-A28T-11A	'--	'--	'--	'--	'--	100	'--	'--	'--	'--	'--	'--	100.0	'--	FALSE	'--	'--	true	'--	'--	'--	Solid Tissue Normal	11	'--	released	'--	'--	'--	Not Reported	'--	'--	'--
TCGA-THCA	fd8c4ff3-e759-495f-96e7-1f406bb70190	TCGA-FE-A23A	829db78c-ab3c-41cc-89d6-9c38519f7989	TCGA-FE-A23A-01A	'--	'--	'--	'--	'--	1838	'--	'--	'--	'--	'--	'--	100.0	'--	FALSE	'--	'--	true	'--	365B2777-B6AC-4B9B-A082-B209C61F9ACE	'--	Primary Tumor	1	'--	released	'--	'--	'--	Not Reported	'--	'--	'--
TCGA-THCA	fd8c4ff3-e759-495f-96e7-1f406bb70190	TCGA-FE-A23A	bfc55700-4b2d-48b8-9db8-e64e5fb23e3f	TCGA-FE-A23A-01Z	'--	'--	'--	'--	'--	'--	0	'--	'--	'--	'--	'--	'--	'--	TRUE	'--	'--	No	'--	'--	FFPE	Primary Tumor	1	'--	released	'--	'--	'--	Not Reported	'--	'--	'--
TCGA-THCA	fd8c4ff3-e759-495f-96e7-1f406bb70190	TCGA-FE-A23A	2f2e8d32-7308-4429-ab93-8143b4baee9c	TCGA-FE-A23A-10A	'--	'--	'--	'--	'--	1850	'--	'--	'--	'--	'--	'--	'--	'--	FALSE	'--	'--	false	'--	'--	'--	Blood Derived Normal	10	'--	released	'--	'--	'--	Not Reported	'--	'--	'--
TCGA-THCA	368689a0-f782-4826-9f08-cf0e0055162e	TCGA-DJ-A3UQ	b3661898-0bc1-4698-b7ca-4ba303e5b1c3	TCGA-DJ-A3UQ-01Z	'--	'--	'--	'--	'--	'--	0	'--	'--	'--	'--	'--	'--	'--	TRUE	'--	'--	No	'--	'--	FFPE	Primary Tumor	1	'--	released	'--	'--	'--	Not Reported	'--	'--	'--
TCGA-THCA	368689a0-f782-4826-9f08-cf0e0055162e	TCGA-DJ-A3UQ	92c74118-761e-4fc7-b5dd-7e457254602d	TCGA-DJ-A3UQ-01A	'--	'--	'--	'--	'--	210	'--	'--	'--	'--	'--	'--	20.0	'--	FALSE	'--	'--	true	'--	2F03D3BA-CD94-4EAE-8084-EBDCB3143222	'--	Primary Tumor	1	'--	released	'--	'--	'--	Not Reported	'--	'--	'--
TCGA-THCA	368689a0-f782-4826-9f08-cf0e0055162e	TCGA-DJ-A3UQ	cd46fc26-c7a5-4e80-a321-8e87713f56be	TCGA-DJ-A3UQ-10A	'--	'--	'--	'--	'--	210	'--	'--	'--	'--	'--	'--	'--	'--	FALSE	'--	'--	false	'--	'--	'--	Blood Derived Normal	10	'--	released	'--	'--	'--	Not Reported	'--	'--	'--
TCGA-THCA	7244b7db-8282-43aa-a4b4-ad6af972cf9b	TCGA-EM-A2CQ	5c45ad98-1978-4c8d-835a-ee51b1bded87	TCGA-EM-A2CQ-01Z	'--	'--	'--	'--	'--	'--	0	'--	'--	'--	'--	'--	'--	'--	TRUE	'--	'--	No	'--	'--	FFPE	Primary Tumor	1	'--	released	'--	'--	'--	Not Reported	'--	'--	'--
TCGA-THCA	7244b7db-8282-43aa-a4b4-ad6af972cf9b	TCGA-EM-A2CQ	c1cdbd62-71ba-4e46-9bd4-0033a75f90fe	TCGA-EM-A2CQ-01A	'--	'--	'--	'--	'--	130	'--	'--	'--	'--	'--	'--	100.0	'--	FALSE	'--	'--	false	'--	54D48CFB-957A-4233-8DE7-8B867862D894	'--	Primary Tumor	1	'--	released	'--	'--	'--	Not Reported	'--	'--	'--
TCGA-THCA	7244b7db-8282-43aa-a4b4-ad6af972cf9b	TCGA-EM-A2CQ	a9c25405-11a2-4d6d-9515-8181ba2fc44a	TCGA-EM-A2CQ-10A	'--	'--	'--	'--	'--	220	'--	'--	'--	'--	'--	'--	'--	'--	FALSE	'--	'--	false	'--	'--	'--	Blood Derived Normal	10	'--	released	'--	'--	'--	Not Reported	'--	'--	'--
TCGA-THCA	c35e4390-2809-4d88-86f3-208de05b338a	TCGA-QD-A8IV	be9db251-3e71-4c8c-b990-9b0737a17412	TCGA-QD-A8IV-01Z	'--	'--	'--	'--	'--	'--	0	'--	'--	'--	'--	'--	'--	'--	TRUE	'--	'--	No	'--	'--	FFPE	Primary Tumor	1	'--	released	'--	'--	'--	Not Reported	'--	'--	'--
TCGA-THCA	c35e4390-2809-4d88-86f3-208de05b338a	TCGA-QD-A8IV	f0cc529d-fe3e-47e6-b9ee-a0af39b086ad	TCGA-QD-A8IV-10A	'--	'--	'--	'--	'--	42	'--	'--	'--	'--	'--	'--	'--	'--	FALSE	'--	'--	false	'--	'--	'--	Blood Derived Normal	10	'--	released	'--	'--	'--	Not Reported	'--	'--	'--
TCGA-THCA	c35e4390-2809-4d88-86f3-208de05b338a	TCGA-QD-A8IV	32383cfd-9cbe-4ca7-9d94-fb215aa863ee	TCGA-QD-A8IV-01A	'--	'--	'--	'--	'--	42	'--	'--	'--	'--	'--	'--	270.0	'--	FALSE	'--	'--	true	'--	9B35F0B4-C4E1-4EC4-9B58-550AC430984D	'--	Primary Tumor	1	'--	released	'--	'--	'--	Not Reported	'--	'--	'--
TCGA-THCA	c8703a65-816b-4f6e-bb15-53dcb3288f66	TCGA-EM-A2CT	3dafcad0-37e2-4766-b282-551d1c29a199	TCGA-EM-A2CT-01Z	'--	'--	'--	'--	'--	'--	0	'--	'--	'--	'--	'--	'--	'--	TRUE	'--	'--	No	'--	'--	FFPE	Primary Tumor	1	'--	released	'--	'--	'--	Not Reported	'--	'--	'--
TCGA-THCA	c8703a65-816b-4f6e-bb15-53dcb3288f66	TCGA-EM-A2CT	a4cf9977-e76f-497e-b853-74e1036ab295	TCGA-EM-A2CT-10A	'--	'--	'--	'--	'--	220	'--	'--	'--	'--	'--	'--	'--	'--	FALSE	'--	'--	false	'--	'--	'--	Blood Derived Normal	10	'--	released	'--	'--	'--	Not Reported	'--	'--	'--
TCGA-THCA	c8703a65-816b-4f6e-bb15-53dcb3288f66	TCGA-EM-A2CT	743c45a2-8999-4120-b770-385912e642b6	TCGA-EM-A2CT-01A	'--	'--	'--	'--	'--	130	'--	'--	'--	'--	'--	'--	70.0	'--	FALSE	'--	'--	false	'--	8EFA3E32-F06C-4DAC-8774-2D05ADE3C3F4	'--	Primary Tumor	1	'--	released	'--	'--	'--	Not Reported	'--	'--	'--
TCGA-THCA	b07435d4-1341-4b41-9b11-d13a4f1ca0ad	TCGA-DJ-A2QA	2277f3f2-411e-47ab-a2b9-f80fd33540a1	TCGA-DJ-A2QA-01A	'--	'--	'--	'--	'--	273	'--	'--	'--	'--	'--	'--	140.0	'--	FALSE	'--	'--	true	'--	E3CC8058-B202-4433-8597-6BD196D04AAC	'--	Primary Tumor	1	'--	released	'--	'--	'--	Not Reported	'--	'--	'--
TCGA-THCA	b07435d4-1341-4b41-9b11-d13a4f1ca0ad	TCGA-DJ-A2QA	5911c405-bad6-4548-bfc6-1ca8b3ece938	TCGA-DJ-A2QA-01Z	'--	'--	'--	'--	'--	'--	0	'--	'--	'--	'--	'--	'--	'--	TRUE	'--	'--	No	'--	'--	FFPE	Primary Tumor	1	'--	released	'--	'--	'--	Not Reported	'--	'--	'--
TCGA-THCA	b07435d4-1341-4b41-9b11-d13a4f1ca0ad	TCGA-DJ-A2QA	9f87f561-2d88-4852-a0f3-3beebe59904b	TCGA-DJ-A2QA-10A	'--	'--	'--	'--	'--	273	'--	'--	'--	'--	'--	'--	'--	'--	FALSE	'--	'--	false	'--	'--	'--	Blood Derived Normal	10	'--	released	'--	'--	'--	Not Reported	'--	'--	'--
TCGA-THCA	52203ff5-57b2-4d56-8935-2ff1eb61d7b8	TCGA-FY-A3I5	7aec7c70-6a5a-48d5-a863-a8db40d93097	TCGA-FY-A3I5-01B	'--	'--	'--	'--	'--	164	'--	'--	'--	'--	'--	'--	210.0	'--	FALSE	'--	'--	true	'--	148DA57C-7105-4189-9494-114FBF524F60	'--	Primary Tumor	1	'--	released	'--	'--	'--	Not Reported	'--	'--	'--
TCGA-THCA	52203ff5-57b2-4d56-8935-2ff1eb61d7b8	TCGA-FY-A3I5	a415acdb-70ac-48ab-b080-293027b45970	TCGA-FY-A3I5-10A	'--	'--	'--	'--	'--	73	'--	'--	'--	'--	'--	'--	'--	'--	FALSE	'--	'--	false	'--	'--	'--	Blood Derived Normal	10	'--	released	'--	'--	'--	Not Reported	'--	'--	'--
TCGA-THCA	52203ff5-57b2-4d56-8935-2ff1eb61d7b8	TCGA-FY-A3I5	5e21cd43-e6fc-4e46-9f64-4c13b552aa22	TCGA-FY-A3I5-01Z	'--	'--	'--	'--	'--	'--	0	'--	'--	'--	'--	'--	'--	'--	TRUE	'--	'--	No	'--	'--	FFPE	Primary Tumor	1	'--	released	'--	'--	'--	Not Reported	'--	'--	'--
TCGA-THCA	5dcbdfcf-8a4d-4da5-9049-f2b970fe8ca8	TCGA-DJ-A2PZ	601e9bc0-7c2a-4cb1-b12e-275d0262dbe7	TCGA-DJ-A2PZ-01Z	'--	'--	'--	'--	'--	'--	0	'--	'--	'--	'--	'--	'--	'--	TRUE	'--	'--	No	'--	'--	FFPE	Primary Tumor	1	'--	released	'--	'--	'--	Not Reported	'--	'--	'--
TCGA-THCA	5dcbdfcf-8a4d-4da5-9049-f2b970fe8ca8	TCGA-DJ-A2PZ	a97d91e4-bed3-4391-b37e-1fcb9352d452	TCGA-DJ-A2PZ-10A	'--	'--	'--	'--	'--	131	'--	'--	'--	'--	'--	'--	'--	'--	FALSE	'--	'--	false	'--	'--	'--	Blood Derived Normal	10	'--	released	'--	'--	'--	Not Reported	'--	'--	'--
TCGA-THCA	5dcbdfcf-8a4d-4da5-9049-f2b970fe8ca8	TCGA-DJ-A2PZ	400009e4-a0f0-465f-b4a6-60d730ff3e38	TCGA-DJ-A2PZ-01A	'--	'--	'--	'--	'--	131	'--	'--	'--	'--	'--	'--	310.0	'--	FALSE	'--	'--	true	'--	EDBA3217-6ED8-47CC-87F0-B18E41F29217	'--	Primary Tumor	1	'--	released	'--	'--	'--	Not Reported	'--	'--	'--
TCGA-THCA	8dd09d74-0be8-4c58-bf44-de4a2466d044	TCGA-EM-A4FR	4f3d6f1b-4909-426a-aa41-530b56f97fa6	TCGA-EM-A4FR-01Z	'--	'--	'--	'--	'--	'--	0	'--	'--	'--	'--	'--	'--	'--	TRUE	'--	'--	No	'--	'--	FFPE	Primary Tumor	1	'--	released	'--	'--	'--	Not Reported	'--	'--	'--
TCGA-THCA	8dd09d74-0be8-4c58-bf44-de4a2466d044	TCGA-EM-A4FR	6fe7f29c-1d5c-4679-8ebf-ab508bb066f1	TCGA-EM-A4FR-10A	'--	'--	'--	'--	'--	52	'--	'--	'--	'--	'--	'--	'--	'--	FALSE	'--	'--	false	'--	'--	'--	Blood Derived Normal	10	'--	released	'--	'--	'--	Not Reported	'--	'--	'--
TCGA-THCA	8dd09d74-0be8-4c58-bf44-de4a2466d044	TCGA-EM-A4FR	783d1f11-46fa-4e56-b748-1587d26945ab	TCGA-EM-A4FR-01A	'--	'--	'--	'--	'--	52	'--	'--	'--	'--	'--	'--	60.0	'--	FALSE	'--	'--	false	'--	1728DFCA-35E6-4192-9479-79736497884E	'--	Primary Tumor	1	'--	released	'--	'--	'--	Not Reported	'--	'--	'--
TCGA-THCA	424de829-9efd-4689-ac5d-24485a5d5ecf	TCGA-ET-A3DW	64690ddc-dfa9-46c9-bde3-8180212236ee	TCGA-ET-A3DW-01A	'--	'--	'--	'--	'--	3138	'--	'--	'--	'--	'--	'--	100.0	'--	FALSE	'--	'--	true	'--	3845B33D-DBAD-4C9A-A98B-9EE28EE7A4C6	'--	Primary Tumor	1	'--	released	'--	'--	'--	Not Reported	'--	'--	'--
TCGA-THCA	424de829-9efd-4689-ac5d-24485a5d5ecf	TCGA-ET-A3DW	68ffe6f8-d008-47d8-875b-ac97ee65a293	TCGA-ET-A3DW-01Z	'--	'--	'--	'--	'--	'--	0	'--	'--	'--	'--	'--	'--	'--	TRUE	'--	'--	No	'--	'--	FFPE	Primary Tumor	1	'--	released	'--	'--	'--	Not Reported	'--	'--	'--
TCGA-THCA	424de829-9efd-4689-ac5d-24485a5d5ecf	TCGA-ET-A3DW	9975cd8b-612a-412c-97f7-9ace7763324e	TCGA-ET-A3DW-11A	'--	'--	'--	'--	'--	3138	'--	'--	'--	'--	'--	'--	140.0	'--	FALSE	'--	'--	true	'--	'--	'--	Solid Tissue Normal	11	'--	released	'--	'--	'--	Not Reported	'--	'--	'--
TCGA-THCA	6a63961e-6ca4-45fa-93ee-65f7c392fcf0	TCGA-EL-A4JX	d4225902-aad5-4f6f-b19b-f222959956e6	TCGA-EL-A4JX-01Z	'--	'--	'--	'--	'--	'--	0	'--	'--	'--	'--	'--	'--	'--	TRUE	'--	'--	No	'--	'--	FFPE	Primary Tumor	1	'--	released	'--	'--	'--	Not Reported	'--	'--	'--
TCGA-THCA	6a63961e-6ca4-45fa-93ee-65f7c392fcf0	TCGA-EL-A4JX	0b36c6b5-cd06-4389-8287-cc9e80c604c3	TCGA-EL-A4JX-11A	'--	'--	'--	'--	'--	1269	'--	'--	'--	'--	'--	'--	200.0	'--	FALSE	'--	'--	false	'--	'--	'--	Solid Tissue Normal	11	'--	released	'--	'--	'--	Not Reported	'--	'--	'--
TCGA-THCA	6a63961e-6ca4-45fa-93ee-65f7c392fcf0	TCGA-EL-A4JX	52750f76-8519-4267-917f-253231038cf0	TCGA-EL-A4JX-01A	'--	'--	'--	'--	'--	1269	'--	'--	'--	'--	'--	'--	220.0	'--	FALSE	'--	'--	false	'--	1B5E8571-DB8F-49A3-85C0-66FE037DC1E3	'--	Primary Tumor	1	'--	released	'--	'--	'--	Not Reported	'--	'--	'--
TCGA-THCA	212aa9c4-610d-4286-9ca2-ae6c87b9bc0e	TCGA-ET-A2N0	94391166-4073-4d6d-8612-2e4b3b03e384	TCGA-ET-A2N0-10A	'--	'--	'--	'--	'--	286	'--	'--	'--	'--	'--	'--	'--	'--	FALSE	'--	'--	false	'--	'--	'--	Blood Derived Normal	10	'--	released	'--	'--	'--	Not Reported	'--	'--	'--
TCGA-THCA	212aa9c4-610d-4286-9ca2-ae6c87b9bc0e	TCGA-ET-A2N0	9adf69c1-fcf7-46b2-b693-257788a8786c	TCGA-ET-A2N0-01A	'--	'--	'--	'--	'--	286	'--	'--	'--	'--	'--	'--	110.0	'--	FALSE	'--	'--	true	'--	32489588-DB83-48DF-A0A9-9D3669D5511C	'--	Primary Tumor	1	'--	released	'--	'--	'--	Not Reported	'--	'--	'--
TCGA-THCA	212aa9c4-610d-4286-9ca2-ae6c87b9bc0e	TCGA-ET-A2N0	a58b73ee-9fb6-49cf-8ca3-410bc80747f3	TCGA-ET-A2N0-01Z	'--	'--	'--	'--	'--	'--	0	'--	'--	'--	'--	'--	'--	'--	TRUE	'--	'--	No	'--	'--	FFPE	Primary Tumor	1	'--	released	'--	'--	'--	Not Reported	'--	'--	'--
TCGA-THCA	4d1aec67-c345-4721-8ee8-356b0dff009b	TCGA-FY-A3ON	1392a49c-87bc-45e7-b7d2-acd53e921467	TCGA-FY-A3ON-01A	'--	'--	'--	'--	'--	71	'--	'--	'--	'--	'--	'--	190.0	'--	FALSE	'--	'--	false	'--	986CE45F-0D9A-44C9-B019-C9B1C56D34A9	'--	Primary Tumor	1	'--	released	'--	'--	'--	Not Reported	'--	'--	'--
TCGA-THCA	4d1aec67-c345-4721-8ee8-356b0dff009b	TCGA-FY-A3ON	f00f95c0-7f78-4bdb-89ff-1da992fc562c	TCGA-FY-A3ON-01Z	'--	'--	'--	'--	'--	'--	0	'--	'--	'--	'--	'--	'--	'--	TRUE	'--	'--	No	'--	'--	FFPE	Primary Tumor	1	'--	released	'--	'--	'--	Not Reported	'--	'--	'--
TCGA-THCA	4d1aec67-c345-4721-8ee8-356b0dff009b	TCGA-FY-A3ON	ee84b90f-55b5-4837-959c-51f9ba8062f8	TCGA-FY-A3ON-10A	'--	'--	'--	'--	'--	71	'--	'--	'--	'--	'--	'--	'--	'--	FALSE	'--	'--	false	'--	'--	'--	Blood Derived Normal	10	'--	released	'--	'--	'--	Not Reported	'--	'--	'--
TCGA-THCA	0f9b78c8-ee9d-4e60-939c-bdbe040c212d	TCGA-EM-A3FK	5e12003d-54fb-40f0-ae35-a8158320c282	TCGA-EM-A3FK-10A	'--	'--	'--	'--	'--	499	'--	'--	'--	'--	'--	'--	'--	'--	FALSE	'--	'--	false	'--	'--	'--	Blood Derived Normal	10	'--	released	'--	'--	'--	Not Reported	'--	'--	'--
TCGA-THCA	0f9b78c8-ee9d-4e60-939c-bdbe040c212d	TCGA-EM-A3FK	5510474c-78e6-44a3-b0f3-1c5952ef2a00	TCGA-EM-A3FK-01Z	'--	'--	'--	'--	'--	'--	0	'--	'--	'--	'--	'--	'--	'--	TRUE	'--	'--	No	'--	'--	FFPE	Primary Tumor	1	'--	released	'--	'--	'--	Not Reported	'--	'--	'--
TCGA-THCA	0f9b78c8-ee9d-4e60-939c-bdbe040c212d	TCGA-EM-A3FK	f14e9e7a-b4a4-414b-9e71-caa7e86cc99c	TCGA-EM-A3FK-01A	'--	'--	'--	'--	'--	436	'--	'--	'--	'--	'--	'--	60.0	'--	FALSE	'--	'--	false	'--	A1ED1E7A-FCA0-4F32-9687-88855105E262	'--	Primary Tumor	1	'--	released	'--	'--	'--	Not Reported	'--	'--	'--
TCGA-THCA	6675c581-297d-44cd-b80f-ae7e53d48228	TCGA-BJ-A0ZC	9edb5d50-f4ae-412d-a2ef-f0b2efc226c9	TCGA-BJ-A0ZC-01Z	'--	'--	'--	'--	'--	'--	0	'--	'--	'--	'--	'--	'--	'--	TRUE	'--	'--	No	'--	'--	FFPE	Primary Tumor	1	'--	released	'--	'--	'--	Not Reported	'--	'--	'--
TCGA-THCA	6675c581-297d-44cd-b80f-ae7e53d48228	TCGA-BJ-A0ZC	1f945aff-7bc2-40f5-87db-92313e541243	TCGA-BJ-A0ZC-01A	'--	'--	'--	'--	'--	128	'--	'--	'--	'--	'--	'--	580.0	'--	FALSE	'--	'--	true	'--	963F72D4-5416-48E1-972B-2DD8ED0B68E8	'--	Primary Tumor	1	'--	released	'--	'--	'--	Not Reported	'--	'--	'--
TCGA-THCA	6675c581-297d-44cd-b80f-ae7e53d48228	TCGA-BJ-A0ZC	cf4ce78d-bb15-494e-80e0-6efbc987d617	TCGA-BJ-A0ZC-10A	'--	'--	'--	'--	'--	128	'--	'--	'--	'--	'--	'--	'--	'--	FALSE	'--	'--	false	'--	'--	'--	Blood Derived Normal	10	'--	released	'--	'--	'--	Not Reported	'--	'--	'--
TCGA-THCA	19378727-e0a6-4898-b2d0-f12241616870	TCGA-EM-A3AO	572a5cdb-7aa6-414f-aa57-34d891c9714c	TCGA-EM-A3AO-01Z	'--	'--	'--	'--	'--	'--	0	'--	'--	'--	'--	'--	'--	'--	TRUE	'--	'--	No	'--	'--	FFPE	Primary Tumor	1	'--	released	'--	'--	'--	Not Reported	'--	'--	'--
TCGA-THCA	19378727-e0a6-4898-b2d0-f12241616870	TCGA-EM-A3AO	b3e36502-db40-41fd-8f67-ad2039f2d288	TCGA-EM-A3AO-10A	'--	'--	'--	'--	'--	193	'--	'--	'--	'--	'--	'--	'--	'--	FALSE	'--	'--	false	'--	'--	'--	Blood Derived Normal	10	'--	released	'--	'--	'--	Not Reported	'--	'--	'--
TCGA-THCA	19378727-e0a6-4898-b2d0-f12241616870	TCGA-EM-A3AO	e18ab48c-97fc-4de0-9895-d58aa1aedef1	TCGA-EM-A3AO-01A	'--	'--	'--	'--	'--	136	'--	'--	'--	'--	'--	'--	110.0	'--	FALSE	'--	'--	false	'--	ED64D5D3-1CAF-4632-BDED-4A4194CB68A3	'--	Primary Tumor	1	'--	released	'--	'--	'--	Not Reported	'--	'--	'--
TCGA-THCA	fca0c7d9-5e6f-4aa7-ba04-5df2eb8ba398	TCGA-DJ-A1QF	e4b53ca1-d395-4fea-a962-dfbd2b373a6b	TCGA-DJ-A1QF-01A	'--	'--	'--	'--	'--	664	'--	'--	'--	'--	'--	'--	630.0	'--	FALSE	'--	'--	true	'--	256268EC-7FD9-4296-BFE0-72D78B04269C	'--	Primary Tumor	1	'--	released	'--	'--	'--	Not Reported	'--	'--	'--
TCGA-THCA	fca0c7d9-5e6f-4aa7-ba04-5df2eb8ba398	TCGA-DJ-A1QF	11ecedee-9701-4923-b899-ec553d73b7b0	TCGA-DJ-A1QF-10A	'--	'--	'--	'--	'--	664	'--	'--	'--	'--	'--	'--	'--	'--	FALSE	'--	'--	false	'--	'--	'--	Blood Derived Normal	10	'--	released	'--	'--	'--	Not Reported	'--	'--	'--
TCGA-THCA	fca0c7d9-5e6f-4aa7-ba04-5df2eb8ba398	TCGA-DJ-A1QF	7196c7d7-d8af-4a4b-9bc6-7a3151560d0b	TCGA-DJ-A1QF-01Z	'--	'--	'--	'--	'--	'--	0	'--	'--	'--	'--	'--	'--	'--	TRUE	'--	'--	No	'--	'--	FFPE	Primary Tumor	1	'--	released	'--	'--	'--	Not Reported	'--	'--	'--
TCGA-THCA	149b46a3-75de-44e1-ba73-bdc4ff379c7f	TCGA-EL-A3ZH	e4646123-1224-4056-a3ec-fd03255c5a4c	TCGA-EL-A3ZH-01A	'--	'--	'--	'--	'--	2228	'--	'--	'--	'--	'--	'--	250.0	'--	FALSE	'--	'--	false	'--	173A9ED2-E1E5-4EF7-A3B2-EA9E9F72422B	'--	Primary Tumor	1	'--	released	'--	'--	'--	Not Reported	'--	'--	'--
TCGA-THCA	149b46a3-75de-44e1-ba73-bdc4ff379c7f	TCGA-EL-A3ZH	bd588bc5-c0d0-4050-8ecc-e910e526c36e	TCGA-EL-A3ZH-11A	'--	'--	'--	'--	'--	2228	'--	'--	'--	'--	'--	'--	220.0	'--	FALSE	'--	'--	false	'--	'--	'--	Solid Tissue Normal	11	'--	released	'--	'--	'--	Not Reported	'--	'--	'--
TCGA-THCA	149b46a3-75de-44e1-ba73-bdc4ff379c7f	TCGA-EL-A3ZH	5ffe7786-919d-4117-92fb-25731fd4b12b	TCGA-EL-A3ZH-01Z	'--	'--	'--	'--	'--	'--	0	'--	'--	'--	'--	'--	'--	'--	TRUE	'--	'--	No	'--	'--	FFPE	Primary Tumor	1	'--	released	'--	'--	'--	Not Reported	'--	'--	'--
TCGA-THCA	a00da907-e527-45f9-9afb-2fad2c7b0940	TCGA-DJ-A2Q2	33167ed2-2095-4ada-a7e6-246a3e312ed9	TCGA-DJ-A2Q2-10A	'--	'--	'--	'--	'--	106	'--	'--	'--	'--	'--	'--	'--	'--	FALSE	'--	'--	false	'--	'--	'--	Blood Derived Normal	10	'--	released	'--	'--	'--	Not Reported	'--	'--	'--
TCGA-THCA	a00da907-e527-45f9-9afb-2fad2c7b0940	TCGA-DJ-A2Q2	a2e3ca88-9ff0-44ad-8c5a-ca4c7b404de6	TCGA-DJ-A2Q2-01A	'--	'--	'--	'--	'--	106	'--	'--	'--	'--	'--	'--	340.0	'--	FALSE	'--	'--	true	'--	B7ACF926-7983-4DBC-8017-F85BCC85AC70	'--	Primary Tumor	1	'--	released	'--	'--	'--	Not Reported	'--	'--	'--
TCGA-THCA	a00da907-e527-45f9-9afb-2fad2c7b0940	TCGA-DJ-A2Q2	e794fa92-b87c-4945-939d-896920aede27	TCGA-DJ-A2Q2-01Z	'--	'--	'--	'--	'--	'--	0	'--	'--	'--	'--	'--	'--	'--	TRUE	'--	'--	No	'--	'--	FFPE	Primary Tumor	1	'--	released	'--	'--	'--	Not Reported	'--	'--	'--
TCGA-THCA	e069dcad-2fd1-464e-a5e9-fe36f05a0446	TCGA-EL-A3H4	4beb9f78-dd44-472f-ba6d-c38fced772d7	TCGA-EL-A3H4-01Z	'--	'--	'--	'--	'--	'--	0	'--	'--	'--	'--	'--	'--	'--	TRUE	'--	'--	No	'--	'--	FFPE	Primary Tumor	1	'--	released	'--	'--	'--	Not Reported	'--	'--	'--
TCGA-THCA	e069dcad-2fd1-464e-a5e9-fe36f05a0446	TCGA-EL-A3H4	4d39b518-bf36-43ff-af82-feb4682cdfde	TCGA-EL-A3H4-01A	'--	'--	'--	'--	'--	849	'--	'--	'--	'--	'--	'--	260.0	'--	FALSE	'--	'--	false	'--	587AB240-F36D-4FE3-B0A5-81C52DD1A6AF	'--	Primary Tumor	1	'--	released	'--	'--	'--	Not Reported	'--	'--	'--
TCGA-THCA	e069dcad-2fd1-464e-a5e9-fe36f05a0446	TCGA-EL-A3H4	829a3508-75bb-4457-b581-d60f06df6de5	TCGA-EL-A3H4-10A	'--	'--	'--	'--	'--	849	'--	'--	'--	'--	'--	'--	'--	'--	FALSE	'--	'--	false	'--	'--	'--	Blood Derived Normal	10	'--	released	'--	'--	'--	Not Reported	'--	'--	'--
TCGA-THCA	2b84cfbc-7cf6-4cb1-a1e3-ba85dafb89f4	TCGA-EM-A3FR	6b610b46-f51c-47ae-b5d1-caf366e9b2ac	TCGA-EM-A3FR-10A	'--	'--	'--	'--	'--	158	'--	'--	'--	'--	'--	'--	'--	'--	FALSE	'--	'--	false	'--	'--	'--	Blood Derived Normal	10	'--	released	'--	'--	'--	Not Reported	'--	'--	'--
TCGA-THCA	2b84cfbc-7cf6-4cb1-a1e3-ba85dafb89f4	TCGA-EM-A3FR	319e3498-d5fb-4142-a09f-aba779dbc094	TCGA-EM-A3FR-01A	'--	'--	'--	'--	'--	95	'--	'--	'--	'--	'--	'--	80.0	'--	FALSE	'--	'--	false	'--	604E6742-0F04-4E7C-8684-D29344ED6711	'--	Primary Tumor	1	'--	released	'--	'--	'--	Not Reported	'--	'--	'--
TCGA-THCA	2b84cfbc-7cf6-4cb1-a1e3-ba85dafb89f4	TCGA-EM-A3FR	f37bbab3-df89-4df1-aacd-9736512eb7ec	TCGA-EM-A3FR-01Z	'--	'--	'--	'--	'--	'--	0	'--	'--	'--	'--	'--	'--	'--	TRUE	'--	'--	No	'--	'--	FFPE	Primary Tumor	1	'--	released	'--	'--	'--	Not Reported	'--	'--	'--
TCGA-THCA	8a233b01-2959-467f-8950-02be16309156	TCGA-EL-A3T9	b2b3f5b7-ebd3-48db-8678-3e105653985f	TCGA-EL-A3T9-11A	'--	'--	'--	'--	'--	2492	'--	'--	'--	'--	'--	'--	230.0	'--	FALSE	'--	'--	true	'--	'--	'--	Solid Tissue Normal	11	'--	released	'--	'--	'--	Not Reported	'--	'--	'--
TCGA-THCA	8a233b01-2959-467f-8950-02be16309156	TCGA-EL-A3T9	ba2dcd8b-1f2d-43d3-9296-760790a40c4d	TCGA-EL-A3T9-01Z	'--	'--	'--	'--	'--	'--	0	'--	'--	'--	'--	'--	'--	'--	TRUE	'--	'--	No	'--	'--	FFPE	Primary Tumor	1	'--	released	'--	'--	'--	Not Reported	'--	'--	'--
TCGA-THCA	8a233b01-2959-467f-8950-02be16309156	TCGA-EL-A3T9	5297f55c-3a46-47ed-8acc-03333ac26473	TCGA-EL-A3T9-01A	'--	'--	'--	'--	'--	2492	'--	'--	'--	'--	'--	'--	270.0	'--	FALSE	'--	'--	true	'--	C6AF9429-7F8D-40ED-90D7-E91332C5C66B	'--	Primary Tumor	1	'--	released	'--	'--	'--	Not Reported	'--	'--	'--
TCGA-THCA	8877b479-b62a-4794-b71e-418de96dff23	TCGA-BJ-A0ZJ	82c99a8e-9640-4f09-94c0-07fb8a7588b7	TCGA-BJ-A0ZJ-10A	'--	'--	'--	'--	'--	124	'--	'--	'--	'--	'--	'--	'--	'--	FALSE	'--	'--	false	'--	'--	'--	Blood Derived Normal	10	'--	released	'--	'--	'--	Not Reported	'--	'--	'--
TCGA-THCA	8877b479-b62a-4794-b71e-418de96dff23	TCGA-BJ-A0ZJ	05a5fc76-ae58-4282-8071-a9e616c111be	TCGA-BJ-A0ZJ-01Z	'--	'--	'--	'--	'--	'--	0	'--	'--	'--	'--	'--	'--	'--	TRUE	'--	'--	No	'--	'--	FFPE	Primary Tumor	1	'--	released	'--	'--	'--	Not Reported	'--	'--	'--
TCGA-THCA	8877b479-b62a-4794-b71e-418de96dff23	TCGA-BJ-A0ZJ	c6d64d80-c8aa-494a-8c0e-8640beebdfc9	TCGA-BJ-A0ZJ-01A	'--	'--	'--	'--	'--	124	'--	'--	'--	'--	'--	'--	270.0	'--	FALSE	'--	'--	true	'--	A91C8B9B-D16A-4D79-A078-6F61ECEEECB4	'--	Primary Tumor	1	'--	released	'--	'--	'--	Not Reported	'--	'--	'--
TCGA-THCA	7deedeba-f05b-453c-9df1-eeb20b0ec72e	TCGA-GE-A2C6	dc7837f2-9b14-4e27-a7f8-08fe3ce27761	TCGA-GE-A2C6-10A	'--	'--	'--	'--	'--	57	'--	'--	'--	'--	'--	'--	'--	'--	FALSE	'--	'--	false	'--	'--	'--	Blood Derived Normal	10	'--	released	'--	'--	'--	Not Reported	'--	'--	'--
TCGA-THCA	7deedeba-f05b-453c-9df1-eeb20b0ec72e	TCGA-GE-A2C6	d717eecf-11dc-4e15-851a-9ea18332a48b	TCGA-GE-A2C6-01A	'--	'--	'--	'--	'--	57	'--	'--	'--	'--	'--	'--	90.0	'--	FALSE	'--	'--	false	'--	009D16C2-2C9C-4955-90B4-A49F54033C74	'--	Primary Tumor	1	'--	released	'--	'--	'--	Not Reported	'--	'--	'--
TCGA-THCA	7deedeba-f05b-453c-9df1-eeb20b0ec72e	TCGA-GE-A2C6	be3fb728-7145-4e09-ac15-623fd3c191eb	TCGA-GE-A2C6-01Z	'--	'--	'--	'--	'--	'--	0	'--	'--	'--	'--	'--	'--	'--	TRUE	'--	'--	No	'--	'--	FFPE	Primary Tumor	1	'--	released	'--	'--	'--	Not Reported	'--	'--	'--
TCGA-THCA	7deedeba-f05b-453c-9df1-eeb20b0ec72e	TCGA-GE-A2C6	8b5cbb35-6ddc-4784-993b-179de3699f28	TCGA-GE-A2C6-11A	'--	'--	'--	'--	'--	57	'--	'--	'--	'--	'--	'--	70.0	'--	FALSE	'--	'--	false	'--	'--	'--	Solid Tissue Normal	11	'--	released	'--	'--	'--	Not Reported	'--	'--	'--
TCGA-THCA	154b4e7f-06f9-4813-beab-232227229f8b	TCGA-EL-A3GY	a944c399-3db4-427d-8289-8db2261868e0	TCGA-EL-A3GY-01Z	'--	'--	'--	'--	'--	'--	0	'--	'--	'--	'--	'--	'--	'--	TRUE	'--	'--	No	'--	'--	FFPE	Primary Tumor	1	'--	released	'--	'--	'--	Not Reported	'--	'--	'--
TCGA-THCA	154b4e7f-06f9-4813-beab-232227229f8b	TCGA-EL-A3GY	5d469adf-ac99-4935-ae91-bd7a12446085	TCGA-EL-A3GY-01A	'--	'--	'--	'--	'--	2698	'--	'--	'--	'--	'--	'--	210.0	'--	FALSE	'--	'--	false	'--	F7DBE537-2DDB-4C7D-926D-D6BBCA653006	'--	Primary Tumor	1	'--	released	'--	'--	'--	Not Reported	'--	'--	'--
TCGA-THCA	154b4e7f-06f9-4813-beab-232227229f8b	TCGA-EL-A3GY	86e95039-ba21-4759-be8b-8cb7d4eb8a13	TCGA-EL-A3GY-10A	'--	'--	'--	'--	'--	2698	'--	'--	'--	'--	'--	'--	'--	'--	FALSE	'--	'--	false	'--	'--	'--	Blood Derived Normal	10	'--	released	'--	'--	'--	Not Reported	'--	'--	'--
TCGA-THCA	d8d54c81-7ef5-4b0f-b35b-28fbf8c5198e	TCGA-EM-A3AJ	204f6b03-2d67-464f-bf5c-e016e1bfd060	TCGA-EM-A3AJ-10A	'--	'--	'--	'--	'--	266	'--	'--	'--	'--	'--	'--	'--	'--	FALSE	'--	'--	false	'--	'--	'--	Blood Derived Normal	10	'--	released	'--	'--	'--	Not Reported	'--	'--	'--
TCGA-THCA	d8d54c81-7ef5-4b0f-b35b-28fbf8c5198e	TCGA-EM-A3AJ	cfe1c257-38e6-419c-a923-426777abd8d5	TCGA-EM-A3AJ-01Z	'--	'--	'--	'--	'--	'--	0	'--	'--	'--	'--	'--	'--	'--	TRUE	'--	'--	No	'--	'--	FFPE	Primary Tumor	1	'--	released	'--	'--	'--	Not Reported	'--	'--	'--
TCGA-THCA	d8d54c81-7ef5-4b0f-b35b-28fbf8c5198e	TCGA-EM-A3AJ	1316cfd3-0df0-4d46-8234-c736608aa9f9	TCGA-EM-A3AJ-01A	'--	'--	'--	'--	'--	209	'--	'--	'--	'--	'--	'--	130.0	'--	FALSE	'--	'--	false	'--	1F3348F1-27A7-423E-8E8B-243921DC83A0	'--	Primary Tumor	1	'--	released	'--	'--	'--	Not Reported	'--	'--	'--
TCGA-THCA	398d5c2e-f877-4bbf-a10c-486b8523c9ce	TCGA-EM-A3O6	e77bae12-34d0-49d8-98f3-d6cf01103878	TCGA-EM-A3O6-01Z	'--	'--	'--	'--	'--	'--	0	'--	'--	'--	'--	'--	'--	'--	TRUE	'--	'--	No	'--	'--	FFPE	Primary Tumor	1	'--	released	'--	'--	'--	Not Reported	'--	'--	'--
TCGA-THCA	398d5c2e-f877-4bbf-a10c-486b8523c9ce	TCGA-EM-A3O6	b3e6f726-256b-450b-b3f5-a1bb9aab9c15	TCGA-EM-A3O6-01A	'--	'--	'--	'--	'--	123	'--	'--	'--	'--	'--	'--	90.0	'--	FALSE	'--	'--	false	'--	849896B6-D6BA-44EA-8818-FA80E6B7E797	'--	Primary Tumor	1	'--	released	'--	'--	'--	Not Reported	'--	'--	'--
TCGA-THCA	398d5c2e-f877-4bbf-a10c-486b8523c9ce	TCGA-EM-A3O6	d9f42748-4a69-45aa-90b3-efdf0b98a1c1	TCGA-EM-A3O6-10A	'--	'--	'--	'--	'--	192	'--	'--	'--	'--	'--	'--	'--	'--	FALSE	'--	'--	false	'--	'--	'--	Blood Derived Normal	10	'--	released	'--	'--	'--	Not Reported	'--	'--	'--
TCGA-THCA	8bea483b-ac43-4265-b2c4-0f031e539008	TCGA-DJ-A2Q0	29287a15-88f9-4a14-ad3e-cbe4719aba59	TCGA-DJ-A2Q0-01Z	'--	'--	'--	'--	'--	'--	0	'--	'--	'--	'--	'--	'--	'--	TRUE	'--	'--	No	'--	'--	FFPE	Primary Tumor	1	'--	released	'--	'--	'--	Not Reported	'--	'--	'--
TCGA-THCA	8bea483b-ac43-4265-b2c4-0f031e539008	TCGA-DJ-A2Q0	6ba35ae2-9ac7-4305-af69-c8614192faa4	TCGA-DJ-A2Q0-01A	'--	'--	'--	'--	'--	114	'--	'--	'--	'--	'--	'--	240.0	'--	FALSE	'--	'--	true	'--	7A818447-E2BC-4206-BF8E-6BF323630171	'--	Primary Tumor	1	'--	released	'--	'--	'--	Not Reported	'--	'--	'--
TCGA-THCA	8bea483b-ac43-4265-b2c4-0f031e539008	TCGA-DJ-A2Q0	71d1b031-e027-4816-986e-b99d3ad4cf3f	TCGA-DJ-A2Q0-10A	'--	'--	'--	'--	'--	114	'--	'--	'--	'--	'--	'--	'--	'--	FALSE	'--	'--	false	'--	'--	'--	Blood Derived Normal	10	'--	released	'--	'--	'--	Not Reported	'--	'--	'--
TCGA-THCA	0ad2a2b3-c1bb-4597-b28e-a6385f93d09c	TCGA-EM-A1YC	1780d814-e472-4bd0-98db-8dbcf68718d7	TCGA-EM-A1YC-11A	'--	'--	'--	'--	'--	1326	'--	'--	'--	'--	'--	'--	210.0	'--	FALSE	'--	'--	false	'--	'--	'--	Solid Tissue Normal	11	'--	released	'--	'--	'--	Not Reported	'--	'--	'--
TCGA-THCA	0ad2a2b3-c1bb-4597-b28e-a6385f93d09c	TCGA-EM-A1YC	17610b7b-f2ec-4b55-808c-1c2219a0d1ba	TCGA-EM-A1YC-01A	'--	'--	'--	'--	'--	1326	'--	'--	'--	'--	'--	'--	140.0	'--	FALSE	'--	'--	false	'--	EBE0695F-D5AB-40E1-86B8-AA2B98C4986B	'--	Primary Tumor	1	'--	released	'--	'--	'--	Not Reported	'--	'--	'--
TCGA-THCA	0ad2a2b3-c1bb-4597-b28e-a6385f93d09c	TCGA-EM-A1YC	842ed59b-a8ff-492e-9493-8ee525f64a8c	TCGA-EM-A1YC-01Z	'--	'--	'--	'--	'--	'--	0	'--	'--	'--	'--	'--	'--	'--	TRUE	'--	'--	No	'--	'--	FFPE	Primary Tumor	1	'--	released	'--	'--	'--	Not Reported	'--	'--	'--
TCGA-THCA	bcd63672-8a22-4a30-9045-a43def5b4d6f	TCGA-EL-A3D1	300baae8-9e02-4026-9d81-76ebc2346888	TCGA-EL-A3D1-10A	'--	'--	'--	'--	'--	2032	'--	'--	'--	'--	'--	'--	'--	'--	FALSE	'--	'--	false	'--	'--	'--	Blood Derived Normal	10	'--	released	'--	'--	'--	Not Reported	'--	'--	'--
TCGA-THCA	bcd63672-8a22-4a30-9045-a43def5b4d6f	TCGA-EL-A3D1	6aca9b53-3793-4f5c-b340-6c9197b20868	TCGA-EL-A3D1-01Z	'--	'--	'--	'--	'--	'--	0	'--	'--	'--	'--	'--	'--	'--	TRUE	'--	'--	No	'--	'--	FFPE	Primary Tumor	1	'--	released	'--	'--	'--	Not Reported	'--	'--	'--
TCGA-THCA	bcd63672-8a22-4a30-9045-a43def5b4d6f	TCGA-EL-A3D1	a0ff2ba4-1a57-452f-8706-8a47c13a4739	TCGA-EL-A3D1-01A	'--	'--	'--	'--	'--	2032	'--	'--	'--	'--	'--	'--	260.0	'--	FALSE	'--	'--	true	'--	5CEADB5F-C00E-47CD-B28B-138FAF67CED5	'--	Primary Tumor	1	'--	released	'--	'--	'--	Not Reported	'--	'--	'--
TCGA-THCA	b82e08e3-ae79-404a-a501-0d501df84b8b	TCGA-DJ-A3V0	92ac95fd-050a-4c06-a374-3a5ef1907fe9	TCGA-DJ-A3V0-01Z	'--	'--	'--	'--	'--	'--	0	'--	'--	'--	'--	'--	'--	'--	TRUE	'--	'--	No	'--	'--	FFPE	Primary Tumor	1	'--	released	'--	'--	'--	Not Reported	'--	'--	'--
TCGA-THCA	b82e08e3-ae79-404a-a501-0d501df84b8b	TCGA-DJ-A3V0	9af66f6c-9549-4d2c-995c-f6424c6a6c21	TCGA-DJ-A3V0-01A	'--	'--	'--	'--	'--	664	'--	'--	'--	'--	'--	'--	510.0	'--	FALSE	'--	'--	true	'--	F391F61B-413E-445F-A4AB-E6EA65B57DB3	'--	Primary Tumor	1	'--	released	'--	'--	'--	Not Reported	'--	'--	'--
TCGA-THCA	b82e08e3-ae79-404a-a501-0d501df84b8b	TCGA-DJ-A3V0	3575e73b-b895-4520-9d62-46e7ea1d9506	TCGA-DJ-A3V0-10A	'--	'--	'--	'--	'--	664	'--	'--	'--	'--	'--	'--	'--	'--	FALSE	'--	'--	false	'--	'--	'--	Blood Derived Normal	10	'--	released	'--	'--	'--	Not Reported	'--	'--	'--
TCGA-THCA	2ce580e9-4d75-464c-b403-c9f4626d7aa4	TCGA-DJ-A2PR	045cb6e7-2029-430f-941d-871c64fce8f8	TCGA-DJ-A2PR-01A	'--	'--	'--	'--	'--	155	'--	'--	'--	'--	'--	'--	450.0	'--	FALSE	'--	'--	true	'--	B78B9C06-DE73-47A9-A32A-73F60351433A	'--	Primary Tumor	1	'--	released	'--	'--	'--	Not Reported	'--	'--	'--
TCGA-THCA	2ce580e9-4d75-464c-b403-c9f4626d7aa4	TCGA-DJ-A2PR	37cc95c3-b328-4f2b-b9d2-7429eb1ca0d2	TCGA-DJ-A2PR-01Z	'--	'--	'--	'--	'--	'--	0	'--	'--	'--	'--	'--	'--	'--	TRUE	'--	'--	No	'--	'--	FFPE	Primary Tumor	1	'--	released	'--	'--	'--	Not Reported	'--	'--	'--
TCGA-THCA	2ce580e9-4d75-464c-b403-c9f4626d7aa4	TCGA-DJ-A2PR	428b5efb-7dad-466d-8ce4-e15c5b77900c	TCGA-DJ-A2PR-10A	'--	'--	'--	'--	'--	155	'--	'--	'--	'--	'--	'--	'--	'--	FALSE	'--	'--	false	'--	'--	'--	Blood Derived Normal	10	'--	released	'--	'--	'--	Not Reported	'--	'--	'--
TCGA-THCA	89f4a6a5-bf9b-4a0e-bacf-8cd715c2ca93	TCGA-EL-A4K9	2f6e013c-f8be-4812-9139-6a6fa3213c89	TCGA-EL-A4K9-01A	'--	'--	'--	'--	'--	1114	'--	'--	'--	'--	'--	'--	210.0	'--	FALSE	'--	'--	false	'--	C0BC2B9A-EA85-41B7-86CE-942DF49DA6F5	'--	Primary Tumor	1	'--	released	'--	'--	'--	Not Reported	'--	'--	'--
TCGA-THCA	89f4a6a5-bf9b-4a0e-bacf-8cd715c2ca93	TCGA-EL-A4K9	d6206d9b-a52f-4377-ae29-5e78dfa5f00c	TCGA-EL-A4K9-11A	'--	'--	'--	'--	'--	1114	'--	'--	'--	'--	'--	'--	330.0	'--	FALSE	'--	'--	false	'--	'--	'--	Solid Tissue Normal	11	'--	released	'--	'--	'--	Not Reported	'--	'--	'--
TCGA-THCA	89f4a6a5-bf9b-4a0e-bacf-8cd715c2ca93	TCGA-EL-A4K9	137bf968-d690-46d3-a5b7-b0360d600140	TCGA-EL-A4K9-01Z	'--	'--	'--	'--	'--	'--	0	'--	'--	'--	'--	'--	'--	'--	TRUE	'--	'--	No	'--	'--	FFPE	Primary Tumor	1	'--	released	'--	'--	'--	Not Reported	'--	'--	'--
TCGA-THCA	e35b2928-8784-45d0-a71a-a2df161542fa	TCGA-DJ-A2Q1	3d2de63e-6d83-4f34-97ef-4d85fe55590e	TCGA-DJ-A2Q1-10A	'--	'--	'--	'--	'--	121	'--	'--	'--	'--	'--	'--	'--	'--	FALSE	'--	'--	false	'--	'--	'--	Blood Derived Normal	10	'--	released	'--	'--	'--	Not Reported	'--	'--	'--
TCGA-THCA	e35b2928-8784-45d0-a71a-a2df161542fa	TCGA-DJ-A2Q1	8f4ba6fb-d04a-41cf-8e70-f37acec93dec	TCGA-DJ-A2Q1-01Z	'--	'--	'--	'--	'--	'--	0	'--	'--	'--	'--	'--	'--	'--	TRUE	'--	'--	No	'--	'--	FFPE	Primary Tumor	1	'--	released	'--	'--	'--	Not Reported	'--	'--	'--
TCGA-THCA	e35b2928-8784-45d0-a71a-a2df161542fa	TCGA-DJ-A2Q1	d1361cb2-6758-4a8c-ae97-8ad5192572fc	TCGA-DJ-A2Q1-01A	'--	'--	'--	'--	'--	121	'--	'--	'--	'--	'--	'--	170.0	'--	FALSE	'--	'--	true	'--	5621D9A6-6B60-4EDC-AE6E-FAFD638DDE8E	'--	Primary Tumor	1	'--	released	'--	'--	'--	Not Reported	'--	'--	'--
TCGA-THCA	061fab24-727a-4551-a205-89eeb9f530ea	TCGA-DJ-A2Q9	094cf919-3e36-4d9e-9d37-a00ae04736ee	TCGA-DJ-A2Q9-01A	'--	'--	'--	'--	'--	181	'--	'--	'--	'--	'--	'--	210.0	'--	FALSE	'--	'--	true	'--	37E0F0C8-2294-4F1B-AE62-DB3BD888575B	'--	Primary Tumor	1	'--	released	'--	'--	'--	Not Reported	'--	'--	'--
TCGA-THCA	061fab24-727a-4551-a205-89eeb9f530ea	TCGA-DJ-A2Q9	92dcda7e-2435-499c-8a67-910dffab27b0	TCGA-DJ-A2Q9-01Z	'--	'--	'--	'--	'--	'--	0	'--	'--	'--	'--	'--	'--	'--	TRUE	'--	'--	No	'--	'--	FFPE	Primary Tumor	1	'--	released	'--	'--	'--	Not Reported	'--	'--	'--
TCGA-THCA	061fab24-727a-4551-a205-89eeb9f530ea	TCGA-DJ-A2Q9	c22b98be-187d-46f9-b954-404759474a3f	TCGA-DJ-A2Q9-10A	'--	'--	'--	'--	'--	181	'--	'--	'--	'--	'--	'--	'--	'--	FALSE	'--	'--	false	'--	'--	'--	Blood Derived Normal	10	'--	released	'--	'--	'--	Not Reported	'--	'--	'--
TCGA-THCA	8492820d-b619-4a74-95d3-eb574067f3f3	TCGA-EM-A22Q	25f24d7a-60fc-46c0-91f4-5621d7ae49b5	TCGA-EM-A22Q-10A	'--	'--	'--	'--	'--	118	'--	'--	'--	'--	'--	'--	'--	'--	FALSE	'--	'--	false	'--	'--	'--	Blood Derived Normal	10	'--	released	'--	'--	'--	Not Reported	'--	'--	'--
TCGA-THCA	8492820d-b619-4a74-95d3-eb574067f3f3	TCGA-EM-A22Q	adc0daca-205b-4a88-9c4f-2d191c762989	TCGA-EM-A22Q-01A	'--	'--	'--	'--	'--	34	'--	'--	'--	'--	'--	'--	100.0	'--	FALSE	'--	'--	false	'--	0BD8BD3E-681E-4604-8385-B3829BFD83CD	'--	Primary Tumor	1	'--	released	'--	'--	'--	Not Reported	'--	'--	'--
TCGA-THCA	8492820d-b619-4a74-95d3-eb574067f3f3	TCGA-EM-A22Q	cfc61013-8bbb-4889-9a04-968b7bc84c51	TCGA-EM-A22Q-01Z	'--	'--	'--	'--	'--	'--	0	'--	'--	'--	'--	'--	'--	'--	TRUE	'--	'--	No	'--	'--	FFPE	Primary Tumor	1	'--	released	'--	'--	'--	Not Reported	'--	'--	'--
TCGA-THCA	7b49f263-fa0d-4f1b-9c00-1ff7a8c9ac79	TCGA-ET-A40P	00a86620-f062-4341-bcbe-51bedd072a25	TCGA-ET-A40P-01Z	'--	'--	'--	'--	'--	'--	0	'--	'--	'--	'--	'--	'--	'--	TRUE	'--	'--	No	'--	'--	FFPE	Primary Tumor	1	'--	released	'--	'--	'--	Not Reported	'--	'--	'--
TCGA-THCA	7b49f263-fa0d-4f1b-9c00-1ff7a8c9ac79	TCGA-ET-A40P	25ff2ea2-7ced-4865-9df7-6e3e8830d55c	TCGA-ET-A40P-01A	'--	'--	'--	'--	'--	371	'--	'--	'--	'--	'--	'--	320.0	'--	FALSE	'--	'--	true	'--	BC87B4BA-1694-4472-9616-D1C83671B416	'--	Primary Tumor	1	'--	released	'--	'--	'--	Not Reported	'--	'--	'--
TCGA-THCA	7b49f263-fa0d-4f1b-9c00-1ff7a8c9ac79	TCGA-ET-A40P	4b44db3d-cf05-4ebb-a1ab-d1646070a315	TCGA-ET-A40P-10A	'--	'--	'--	'--	'--	371	'--	'--	'--	'--	'--	'--	'--	'--	FALSE	'--	'--	false	'--	'--	'--	Blood Derived Normal	10	'--	released	'--	'--	'--	Not Reported	'--	'--	'--
TCGA-THCA	3d952b80-501e-41c6-a3af-0bd6014b81e4	TCGA-EL-A4JZ	19ecc6e5-8479-4e1c-b99b-02bdf867fe97	TCGA-EL-A4JZ-01Z	'--	'--	'--	'--	'--	'--	0	'--	'--	'--	'--	'--	'--	'--	TRUE	'--	'--	No	'--	'--	FFPE	Primary Tumor	1	'--	released	'--	'--	'--	Not Reported	'--	'--	'--
TCGA-THCA	3d952b80-501e-41c6-a3af-0bd6014b81e4	TCGA-EL-A4JZ	e98be97f-afd5-4210-a5d6-580fbb1a40d6	TCGA-EL-A4JZ-11A	'--	'--	'--	'--	'--	1079	'--	'--	'--	'--	'--	'--	240.0	'--	FALSE	'--	'--	false	'--	'--	'--	Solid Tissue Normal	11	'--	released	'--	'--	'--	Not Reported	'--	'--	'--
TCGA-THCA	3d952b80-501e-41c6-a3af-0bd6014b81e4	TCGA-EL-A4JZ	2c11ddb3-f4a6-4ec3-8368-6e89f497c80c	TCGA-EL-A4JZ-01A	'--	'--	'--	'--	'--	1079	'--	'--	'--	'--	'--	'--	300.0	'--	FALSE	'--	'--	false	'--	E8887291-5C5F-46B8-BFA9-A959B8510345	'--	Primary Tumor	1	'--	released	'--	'--	'--	Not Reported	'--	'--	'--
TCGA-THCA	369a07a5-f835-4886-a204-d5584c67f253	TCGA-ET-A39I	ea5bc678-4162-4781-8584-09cadb915bce	TCGA-ET-A39I-01Z	'--	'--	'--	'--	'--	'--	0	'--	'--	'--	'--	'--	'--	'--	TRUE	'--	'--	No	'--	'--	FFPE	Primary Tumor	1	'--	released	'--	'--	'--	Not Reported	'--	'--	'--
TCGA-THCA	369a07a5-f835-4886-a204-d5584c67f253	TCGA-ET-A39I	2f2ddf50-99c0-42a3-9ca1-0440b9af3072	TCGA-ET-A39I-01A	'--	'--	'--	'--	'--	1442	'--	'--	'--	'--	'--	'--	80.0	'--	FALSE	'--	'--	true	'--	130DFC95-3FA7-4B7B-9CC9-22C06F89C9A7	'--	Primary Tumor	1	'--	released	'--	'--	'--	Not Reported	'--	'--	'--
TCGA-THCA	369a07a5-f835-4886-a204-d5584c67f253	TCGA-ET-A39I	ef3a4fe2-b319-4724-86cb-d52166cbea36	TCGA-ET-A39I-10A	'--	'--	'--	'--	'--	1442	'--	'--	'--	'--	'--	'--	'--	'--	FALSE	'--	'--	false	'--	'--	'--	Blood Derived Normal	10	'--	released	'--	'--	'--	Not Reported	'--	'--	'--
TCGA-THCA	097b9cf1-ec0c-487c-9ade-2bdab12eb4ca	TCGA-ET-A25R	18e68337-fffc-49e9-baa5-0ca0948fdd5a	TCGA-ET-A25R-10A	'--	'--	'--	'--	'--	509	'--	'--	'--	'--	'--	'--	'--	'--	FALSE	'--	'--	false	'--	'--	'--	Blood Derived Normal	10	'--	released	'--	'--	'--	Not Reported	'--	'--	'--
TCGA-THCA	097b9cf1-ec0c-487c-9ade-2bdab12eb4ca	TCGA-ET-A25R	c29162a3-f162-4d32-ab9a-421be1feb13c	TCGA-ET-A25R-01A	'--	'--	'--	'--	'--	509	'--	'--	'--	'--	'--	'--	60.0	'--	FALSE	'--	'--	true	'--	E55B4BC8-6271-4992-9529-D5B173D18486	'--	Primary Tumor	1	'--	released	'--	'--	'--	Not Reported	'--	'--	'--
TCGA-THCA	097b9cf1-ec0c-487c-9ade-2bdab12eb4ca	TCGA-ET-A25R	366a992d-d8b4-41ee-8601-d018174a967f	TCGA-ET-A25R-01Z	'--	'--	'--	'--	'--	'--	0	'--	'--	'--	'--	'--	'--	'--	TRUE	'--	'--	No	'--	'--	FFPE	Primary Tumor	1	'--	released	'--	'--	'--	Not Reported	'--	'--	'--
TCGA-THCA	7a9b57c9-6f80-4aea-bf9c-76407c8084be	TCGA-DJ-A2Q7	78c05090-a16c-46ca-821c-7b7b1e52cf05	TCGA-DJ-A2Q7-10A	'--	'--	'--	'--	'--	160	'--	'--	'--	'--	'--	'--	'--	'--	FALSE	'--	'--	false	'--	'--	'--	Blood Derived Normal	10	'--	released	'--	'--	'--	Not Reported	'--	'--	'--
TCGA-THCA	7a9b57c9-6f80-4aea-bf9c-76407c8084be	TCGA-DJ-A2Q7	0ce47762-53d3-4d94-b895-90391ff02d7c	TCGA-DJ-A2Q7-01A	'--	'--	'--	'--	'--	160	'--	'--	'--	'--	'--	'--	590.0	'--	FALSE	'--	'--	true	'--	2C3553C3-902B-4783-A474-332877823538	'--	Primary Tumor	1	'--	released	'--	'--	'--	Not Reported	'--	'--	'--
TCGA-THCA	7a9b57c9-6f80-4aea-bf9c-76407c8084be	TCGA-DJ-A2Q7	170ccd85-6b52-4109-b115-4cae40356634	TCGA-DJ-A2Q7-01Z	'--	'--	'--	'--	'--	'--	0	'--	'--	'--	'--	'--	'--	'--	TRUE	'--	'--	No	'--	'--	FFPE	Primary Tumor	1	'--	released	'--	'--	'--	Not Reported	'--	'--	'--
TCGA-THCA	b4a60a32-2c1b-44fb-92f4-b30f985dc424	TCGA-EL-A4KD	5e93392e-a852-4130-8141-cad028c40a44	TCGA-EL-A4KD-01A	'--	'--	'--	'--	'--	921	'--	'--	'--	'--	'--	'--	200.0	'--	FALSE	'--	'--	false	'--	FC8878CC-A4A0-4C28-853D-BF74BFA64422	'--	Primary Tumor	1	'--	released	'--	'--	'--	Not Reported	'--	'--	'--
TCGA-THCA	b4a60a32-2c1b-44fb-92f4-b30f985dc424	TCGA-EL-A4KD	47c7bd7a-4875-4391-a4c9-db13b2fba025	TCGA-EL-A4KD-11A	'--	'--	'--	'--	'--	921	'--	'--	'--	'--	'--	'--	230.0	'--	FALSE	'--	'--	false	'--	'--	'--	Solid Tissue Normal	11	'--	released	'--	'--	'--	Not Reported	'--	'--	'--
TCGA-THCA	b4a60a32-2c1b-44fb-92f4-b30f985dc424	TCGA-EL-A4KD	1dca76ff-a0c4-4d64-a00e-25dea06dd899	TCGA-EL-A4KD-01Z	'--	'--	'--	'--	'--	'--	0	'--	'--	'--	'--	'--	'--	'--	TRUE	'--	'--	No	'--	'--	FFPE	Primary Tumor	1	'--	released	'--	'--	'--	Not Reported	'--	'--	'--
TCGA-THCA	d61ca744-adc4-44d5-ad15-cc17399e8083	TCGA-DJ-A3UK	fe1f05b6-00e1-43b3-99ed-0168d1478613	TCGA-DJ-A3UK-01A	'--	'--	'--	'--	'--	139	'--	'--	'--	'--	'--	'--	170.0	'--	FALSE	'--	'--	true	'--	C4494D77-7172-4C95-95D4-CFCC3A0F66C5	'--	Primary Tumor	1	'--	released	'--	'--	'--	Not Reported	'--	'--	'--
TCGA-THCA	d61ca744-adc4-44d5-ad15-cc17399e8083	TCGA-DJ-A3UK	88bee8c9-c3f2-4d2c-85d1-a0634d0314cf	TCGA-DJ-A3UK-10A	'--	'--	'--	'--	'--	139	'--	'--	'--	'--	'--	'--	'--	'--	FALSE	'--	'--	false	'--	'--	'--	Blood Derived Normal	10	'--	released	'--	'--	'--	Not Reported	'--	'--	'--
TCGA-THCA	d61ca744-adc4-44d5-ad15-cc17399e8083	TCGA-DJ-A3UK	14bbadde-979f-4a06-a117-8c49d939fb16	TCGA-DJ-A3UK-01Z	'--	'--	'--	'--	'--	'--	0	'--	'--	'--	'--	'--	'--	'--	TRUE	'--	'--	No	'--	'--	FFPE	Primary Tumor	1	'--	released	'--	'--	'--	Not Reported	'--	'--	'--
TCGA-THCA	729fc937-192a-4eb7-b357-b8f0d2da1f08	TCGA-BJ-A2N8	56e0bfd3-6382-41e3-afaa-6f587fb31322	TCGA-BJ-A2N8-11A	'--	'--	'--	'--	'--	103	'--	'--	'--	'--	'--	'--	140.0	'--	FALSE	'--	'--	true	'--	'--	'--	Solid Tissue Normal	11	'--	released	'--	'--	'--	Not Reported	'--	'--	'--
TCGA-THCA	729fc937-192a-4eb7-b357-b8f0d2da1f08	TCGA-BJ-A2N8	cb7b74e9-84b2-4017-a28d-c86ef9dab070	TCGA-BJ-A2N8-10A	'--	'--	'--	'--	'--	103	'--	'--	'--	'--	'--	'--	'--	'--	FALSE	'--	'--	false	'--	'--	'--	Blood Derived Normal	10	'--	released	'--	'--	'--	Not Reported	'--	'--	'--
TCGA-THCA	729fc937-192a-4eb7-b357-b8f0d2da1f08	TCGA-BJ-A2N8	34f73b3b-76b7-4d68-9812-5376810a8f31	TCGA-BJ-A2N8-01A	'--	'--	'--	'--	'--	103	'--	'--	'--	'--	'--	'--	80.0	'--	FALSE	'--	'--	true	'--	8ED5135F-45E6-4B1D-813C-64D3E86EC9AD	'--	Primary Tumor	1	'--	released	'--	'--	'--	Not Reported	'--	'--	'--
TCGA-THCA	729fc937-192a-4eb7-b357-b8f0d2da1f08	TCGA-BJ-A2N8	e700a401-56ac-4f0e-91fa-072ed50090a3	TCGA-BJ-A2N8-01Z	'--	'--	'--	'--	'--	'--	0	'--	'--	'--	'--	'--	'--	'--	TRUE	'--	'--	No	'--	'--	FFPE	Primary Tumor	1	'--	released	'--	'--	'--	Not Reported	'--	'--	'--
TCGA-THCA	cb29e795-7618-4882-a7e0-69d39787b80c	TCGA-DJ-A1QG	a1e5b162-74de-402c-a489-db858e6e499c	TCGA-DJ-A1QG-01Z	'--	'--	'--	'--	'--	'--	0	'--	'--	'--	'--	'--	'--	'--	TRUE	'--	'--	No	'--	'--	FFPE	Primary Tumor	1	'--	released	'--	'--	'--	Not Reported	'--	'--	'--
TCGA-THCA	cb29e795-7618-4882-a7e0-69d39787b80c	TCGA-DJ-A1QG	d0a669af-1a0a-451d-9d6f-9eee15f7264c	TCGA-DJ-A1QG-01A	'--	'--	'--	'--	'--	115	'--	'--	'--	'--	'--	'--	120.0	'--	FALSE	'--	'--	true	'--	EEEC9799-0C51-4221-87CE-9C9AA24B0742	'--	Primary Tumor	1	'--	released	'--	'--	'--	Not Reported	'--	'--	'--
TCGA-THCA	cb29e795-7618-4882-a7e0-69d39787b80c	TCGA-DJ-A1QG	083fac8e-f1cf-4870-ab32-1dc6abe973aa	TCGA-DJ-A1QG-10A	'--	'--	'--	'--	'--	115	'--	'--	'--	'--	'--	'--	'--	'--	FALSE	'--	'--	false	'--	'--	'--	Blood Derived Normal	10	'--	released	'--	'--	'--	Not Reported	'--	'--	'--
TCGA-THCA	7b82e2d2-47f9-41a1-9eca-40904c92039c	TCGA-DJ-A3V5	5010d8b7-d959-496e-8544-c596ff31ae6f	TCGA-DJ-A3V5-10A	'--	'--	'--	'--	'--	240	'--	'--	'--	'--	'--	'--	'--	'--	FALSE	'--	'--	false	'--	'--	'--	Blood Derived Normal	10	'--	released	'--	'--	'--	Not Reported	'--	'--	'--
TCGA-THCA	7b82e2d2-47f9-41a1-9eca-40904c92039c	TCGA-DJ-A3V5	fb1e4845-7b30-44c0-8799-fb2c9c619f34	TCGA-DJ-A3V5-01A	'--	'--	'--	'--	'--	240	'--	'--	'--	'--	'--	'--	40.0	'--	FALSE	'--	'--	true	'--	39961D6B-E822-45F5-A744-E97BDB40AF85	'--	Primary Tumor	1	'--	released	'--	'--	'--	Not Reported	'--	'--	'--
TCGA-THCA	7b82e2d2-47f9-41a1-9eca-40904c92039c	TCGA-DJ-A3V5	4e94c9f5-3c40-40ce-94e7-c12a9dd0936a	TCGA-DJ-A3V5-01Z	'--	'--	'--	'--	'--	'--	0	'--	'--	'--	'--	'--	'--	'--	TRUE	'--	'--	No	'--	'--	FFPE	Primary Tumor	1	'--	released	'--	'--	'--	Not Reported	'--	'--	'--
TCGA-THCA	c7a2f394-3e3f-4c90-9f1e-f2be3e5b0d6b	TCGA-DJ-A13L	9345613c-2739-4caf-8411-e5adf57837c6	TCGA-DJ-A13L-01Z	'--	'--	'--	'--	'--	'--	0	'--	'--	'--	'--	'--	'--	'--	TRUE	'--	'--	No	'--	'--	FFPE	Primary Tumor	1	'--	released	'--	'--	'--	Not Reported	'--	'--	'--
TCGA-THCA	c7a2f394-3e3f-4c90-9f1e-f2be3e5b0d6b	TCGA-DJ-A13L	1985d930-dcb1-45fa-a706-559f7b77009e	TCGA-DJ-A13L-10A	'--	'--	'--	'--	'--	149	'--	'--	'--	'--	'--	'--	'--	'--	FALSE	'--	'--	false	'--	'--	'--	Blood Derived Normal	10	'--	released	'--	'--	'--	Not Reported	'--	'--	'--
TCGA-THCA	c7a2f394-3e3f-4c90-9f1e-f2be3e5b0d6b	TCGA-DJ-A13L	ab13fb1a-8b7f-4d84-84a9-c4f7ee59caf8	TCGA-DJ-A13L-01A	'--	'--	'--	'--	'--	149	'--	'--	'--	'--	'--	'--	40.0	'--	FALSE	'--	'--	true	'--	52AF2DB0-ABEF-44A8-ADD8-9A5E6F8EF624	'--	Primary Tumor	1	'--	released	'--	'--	'--	Not Reported	'--	'--	'--
TCGA-THCA	4ec2bb20-2190-4c37-8aaa-4086fef1fbb6	TCGA-DE-A4MB	83d84f98-67cc-4881-88db-406ceda4f34a	TCGA-DE-A4MB-01Z	'--	'--	'--	'--	'--	'--	0	'--	'--	'--	'--	'--	'--	'--	TRUE	'--	'--	No	'--	'--	FFPE	Primary Tumor	1	'--	released	'--	'--	'--	Not Reported	'--	'--	'--
TCGA-THCA	4ec2bb20-2190-4c37-8aaa-4086fef1fbb6	TCGA-DE-A4MB	f1d3e0bd-0a0b-4328-9c9e-229adb972282	TCGA-DE-A4MB-01A	'--	'--	'--	'--	'--	478	'--	'--	'--	'--	'--	'--	250.0	'--	FALSE	'--	'--	false	'--	395EF461-5733-4651-800E-7831D1ACD609	'--	Primary Tumor	1	'--	released	'--	'--	'--	Not Reported	'--	'--	'--
TCGA-THCA	4ec2bb20-2190-4c37-8aaa-4086fef1fbb6	TCGA-DE-A4MB	1c83ba83-cbf7-4307-9b44-6e450020705c	TCGA-DE-A4MB-10A	'--	'--	'--	'--	'--	478	'--	'--	'--	'--	'--	'--	'--	'--	FALSE	'--	'--	false	'--	'--	'--	Blood Derived Normal	10	'--	released	'--	'--	'--	Not Reported	'--	'--	'--
TCGA-THCA	d60f6620-575d-47fe-83e8-80a6ad838bed	TCGA-DJ-A2PO	3dac0fae-da92-47b1-a0b5-5b57c1bbf1da	TCGA-DJ-A2PO-10A	'--	'--	'--	'--	'--	238	'--	'--	'--	'--	'--	'--	'--	'--	FALSE	'--	'--	false	'--	'--	'--	Blood Derived Normal	10	'--	released	'--	'--	'--	Not Reported	'--	'--	'--
TCGA-THCA	d60f6620-575d-47fe-83e8-80a6ad838bed	TCGA-DJ-A2PO	56110c79-55e6-4181-bdd6-c40f29e185c1	TCGA-DJ-A2PO-01A	'--	'--	'--	'--	'--	238	'--	'--	'--	'--	'--	'--	150.0	'--	FALSE	'--	'--	true	'--	752F974A-53AA-4946-9994-E4E49EEE5AEC	'--	Primary Tumor	1	'--	released	'--	'--	'--	Not Reported	'--	'--	'--
TCGA-THCA	d60f6620-575d-47fe-83e8-80a6ad838bed	TCGA-DJ-A2PO	de86e16c-d518-4f01-91b1-81ca8ff86b78	TCGA-DJ-A2PO-01Z	'--	'--	'--	'--	'--	'--	0	'--	'--	'--	'--	'--	'--	'--	TRUE	'--	'--	No	'--	'--	FFPE	Primary Tumor	1	'--	released	'--	'--	'--	Not Reported	'--	'--	'--
TCGA-THCA	8b1987f7-75fd-4e24-be77-891bbd2d40a1	TCGA-EL-A3CS	29595084-85d7-48d1-a64e-a35bdce3a3ad	TCGA-EL-A3CS-10A	'--	'--	'--	'--	'--	2746	'--	'--	'--	'--	'--	'--	'--	'--	FALSE	'--	'--	false	'--	'--	'--	Blood Derived Normal	10	'--	released	'--	'--	'--	Not Reported	'--	'--	'--
TCGA-THCA	8b1987f7-75fd-4e24-be77-891bbd2d40a1	TCGA-EL-A3CS	cc4521be-a451-4c9c-99f1-a701a289f690	TCGA-EL-A3CS-01A	'--	'--	'--	'--	'--	2746	'--	'--	'--	'--	'--	'--	240.0	'--	FALSE	'--	'--	true	'--	E34678CC-5509-47BE-8594-8F77A8243111	'--	Primary Tumor	1	'--	released	'--	'--	'--	Not Reported	'--	'--	'--
TCGA-THCA	8b1987f7-75fd-4e24-be77-891bbd2d40a1	TCGA-EL-A3CS	5f354f76-cbbd-4e8a-91be-04b28e94152a	TCGA-EL-A3CS-01Z	'--	'--	'--	'--	'--	'--	0	'--	'--	'--	'--	'--	'--	'--	TRUE	'--	'--	No	'--	'--	FFPE	Primary Tumor	1	'--	released	'--	'--	'--	Not Reported	'--	'--	'--
TCGA-THCA	a6bdba04-f27d-4cef-bd82-872fb8390e46	TCGA-BJ-A3F0	93a664b4-79e2-49c9-9fbf-e7cb63d1095a	TCGA-BJ-A3F0-01A	'--	'--	'--	'--	'--	49	'--	'--	'--	'--	'--	'--	180.0	'--	FALSE	'--	'--	true	'--	76EF266D-8501-468F-9269-2ABA8D19CA53	'--	Primary Tumor	1	'--	released	'--	'--	'--	Not Reported	'--	'--	'--
TCGA-THCA	a6bdba04-f27d-4cef-bd82-872fb8390e46	TCGA-BJ-A3F0	2fdde64f-bde0-4072-8e65-e4549a64c87e	TCGA-BJ-A3F0-01Z	'--	'--	'--	'--	'--	'--	0	'--	'--	'--	'--	'--	'--	'--	TRUE	'--	'--	No	'--	'--	FFPE	Primary Tumor	1	'--	released	'--	'--	'--	Not Reported	'--	'--	'--
TCGA-THCA	a6bdba04-f27d-4cef-bd82-872fb8390e46	TCGA-BJ-A3F0	2877337a-79b4-4ccd-8c95-1027c367f9cd	TCGA-BJ-A3F0-10A	'--	'--	'--	'--	'--	49	'--	'--	'--	'--	'--	'--	'--	'--	FALSE	'--	'--	false	'--	'--	'--	Blood Derived Normal	10	'--	released	'--	'--	'--	Not Reported	'--	'--	'--
TCGA-THCA	7044dee0-fd6c-4e75-b731-dc60a386a1ab	TCGA-FE-A231	2f9db370-79e8-4656-82ce-1ef4d477b46a	TCGA-FE-A231-10A	'--	'--	'--	'--	'--	260	'--	'--	'--	'--	'--	'--	'--	'--	FALSE	'--	'--	false	'--	'--	'--	Blood Derived Normal	10	'--	released	'--	'--	'--	Not Reported	'--	'--	'--
TCGA-THCA	7044dee0-fd6c-4e75-b731-dc60a386a1ab	TCGA-FE-A231	2dece18f-de37-4971-9d22-f5d60fdc2ff7	TCGA-FE-A231-01Z	'--	'--	'--	'--	'--	'--	0	'--	'--	'--	'--	'--	'--	'--	TRUE	'--	'--	No	'--	'--	FFPE	Primary Tumor	1	'--	released	'--	'--	'--	Not Reported	'--	'--	'--
TCGA-THCA	7044dee0-fd6c-4e75-b731-dc60a386a1ab	TCGA-FE-A231	96c298eb-0699-42ae-b2ea-63a192353d69	TCGA-FE-A231-01A	'--	'--	'--	'--	'--	248	'--	'--	'--	'--	'--	'--	140.0	'--	FALSE	'--	'--	false	'--	8B8522CD-C9E7-4762-99F9-D597B35ABF03	'--	Primary Tumor	1	'--	released	'--	'--	'--	Not Reported	'--	'--	'--
TCGA-THCA	39e68907-3ffb-4ca1-a955-db5fa2f0deb1	TCGA-DJ-A2PT	374756f2-d2a3-40e4-8f16-9c60ab6978f6	TCGA-DJ-A2PT-01Z	'--	'--	'--	'--	'--	'--	0	'--	'--	'--	'--	'--	'--	'--	TRUE	'--	'--	No	'--	'--	FFPE	Primary Tumor	1	'--	released	'--	'--	'--	Not Reported	'--	'--	'--
TCGA-THCA	39e68907-3ffb-4ca1-a955-db5fa2f0deb1	TCGA-DJ-A2PT	f905970f-9d60-44d9-ac7b-a23b6ef81548	TCGA-DJ-A2PT-01A	'--	'--	'--	'--	'--	182	'--	'--	'--	'--	'--	'--	410.0	'--	FALSE	'--	'--	true	'--	0C47594E-54FF-4DC6-BB4C-FC0861570B22	'--	Primary Tumor	1	'--	released	'--	'--	'--	Not Reported	'--	'--	'--
TCGA-THCA	39e68907-3ffb-4ca1-a955-db5fa2f0deb1	TCGA-DJ-A2PT	50f3ea40-8426-46ae-a27e-a794602edb61	TCGA-DJ-A2PT-10A	'--	'--	'--	'--	'--	182	'--	'--	'--	'--	'--	'--	'--	'--	FALSE	'--	'--	false	'--	'--	'--	Blood Derived Normal	10	'--	released	'--	'--	'--	Not Reported	'--	'--	'--
TCGA-THCA	b7a01148-5bab-4268-986a-a9cf7bca967f	TCGA-DO-A1K0	ca1443f9-7028-4f26-aac0-e0d4d0ac1d94	TCGA-DO-A1K0-01Z	'--	'--	'--	'--	'--	'--	0	'--	'--	'--	'--	'--	'--	'--	TRUE	'--	'--	No	'--	'--	FFPE	Primary Tumor	1	'--	released	'--	'--	'--	Not Reported	'--	'--	'--
TCGA-THCA	b7a01148-5bab-4268-986a-a9cf7bca967f	TCGA-DO-A1K0	d654c724-9c1f-41f9-be78-fd14a148cdcf	TCGA-DO-A1K0-10A	'--	'--	'--	'--	'--	282	'--	'--	'--	'--	'--	'--	'--	'--	FALSE	'--	'--	false	'--	'--	'--	Blood Derived Normal	10	'--	released	'--	'--	'--	Not Reported	'--	'--	'--
TCGA-THCA	b7a01148-5bab-4268-986a-a9cf7bca967f	TCGA-DO-A1K0	c25aed9b-a1b7-48a9-8587-8d218f6a9562	TCGA-DO-A1K0-01A	'--	'--	'--	'--	'--	282	'--	'--	'--	'--	'--	'--	260.0	'--	FALSE	'--	'--	false	'--	FB43CFF1-85FF-46D6-BCE2-221B2854A390	'--	Primary Tumor	1	'--	released	'--	'--	'--	Not Reported	'--	'--	'--
TCGA-THCA	00b62df6-1189-4e38-8601-70416e05550d	TCGA-FY-A4B3	0cdf4a7b-bb96-42d6-9189-872e0f120e2c	TCGA-FY-A4B3-10A	'--	'--	'--	'--	'--	62	'--	'--	'--	'--	'--	'--	'--	'--	FALSE	'--	'--	false	'--	'--	'--	Blood Derived Normal	10	'--	released	'--	'--	'--	Not Reported	'--	'--	'--
TCGA-THCA	00b62df6-1189-4e38-8601-70416e05550d	TCGA-FY-A4B3	381f5ae9-2897-40c4-a969-694d3546a265	TCGA-FY-A4B3-01Z	'--	'--	'--	'--	'--	'--	0	'--	'--	'--	'--	'--	'--	'--	TRUE	'--	'--	No	'--	'--	FFPE	Primary Tumor	1	'--	released	'--	'--	'--	Not Reported	'--	'--	'--
TCGA-THCA	00b62df6-1189-4e38-8601-70416e05550d	TCGA-FY-A4B3	2220b79b-c90b-4747-ad12-9a501bd507df	TCGA-FY-A4B3-01A	'--	'--	'--	'--	'--	62	'--	'--	'--	'--	'--	'--	60.0	'--	FALSE	'--	'--	false	'--	99BE85A1-2364-4F2D-A1A1-D0A0717231A4	'--	Primary Tumor	1	'--	released	'--	'--	'--	Not Reported	'--	'--	'--
TCGA-THCA	e2475d48-628b-4095-b101-865d79a4b0ed	TCGA-EL-A3ZL	8add4b0a-efa5-4270-b2a5-c163d749f123	TCGA-EL-A3ZL-11A	'--	'--	'--	'--	'--	1595	'--	'--	'--	'--	'--	'--	240.0	'--	FALSE	'--	'--	false	'--	'--	'--	Solid Tissue Normal	11	'--	released	'--	'--	'--	Not Reported	'--	'--	'--
TCGA-THCA	e2475d48-628b-4095-b101-865d79a4b0ed	TCGA-EL-A3ZL	0804b7ac-d1de-4ad9-a618-f9228cd0fe3a	TCGA-EL-A3ZL-01A	'--	'--	'--	'--	'--	1595	'--	'--	'--	'--	'--	'--	220.0	'--	FALSE	'--	'--	false	'--	97AE09E6-A2B6-4544-A977-71DB50629A32	'--	Primary Tumor	1	'--	released	'--	'--	'--	Not Reported	'--	'--	'--
TCGA-THCA	e2475d48-628b-4095-b101-865d79a4b0ed	TCGA-EL-A3ZL	6b9977ca-64fe-4b62-8c27-78c57e896864	TCGA-EL-A3ZL-01Z	'--	'--	'--	'--	'--	'--	0	'--	'--	'--	'--	'--	'--	'--	TRUE	'--	'--	No	'--	'--	FFPE	Primary Tumor	1	'--	released	'--	'--	'--	Not Reported	'--	'--	'--
TCGA-THCA	77bb90f0-e923-4e28-bb88-4d6b420e0b5c	TCGA-DE-A2OL	6cba95ad-2702-4f50-8b1e-becdaf014b83	TCGA-DE-A2OL-01A	'--	'--	'--	'--	'--	102	'--	'--	'--	'--	'--	'--	210.0	'--	FALSE	'--	'--	false	'--	2562FA10-66F8-41BF-B73E-8D78EBEDD7EB	'--	Primary Tumor	1	'--	released	'--	'--	'--	Not Reported	'--	'--	'--
TCGA-THCA	77bb90f0-e923-4e28-bb88-4d6b420e0b5c	TCGA-DE-A2OL	fb72a12c-0e58-4ec1-9505-ef76891551ec	TCGA-DE-A2OL-10A	'--	'--	'--	'--	'--	102	'--	'--	'--	'--	'--	'--	'--	'--	FALSE	'--	'--	false	'--	'--	'--	Blood Derived Normal	10	'--	released	'--	'--	'--	Not Reported	'--	'--	'--
TCGA-THCA	77bb90f0-e923-4e28-bb88-4d6b420e0b5c	TCGA-DE-A2OL	d7d40142-fb7c-4e10-b64c-66c662d251d9	TCGA-DE-A2OL-01Z	'--	'--	'--	'--	'--	'--	0	'--	'--	'--	'--	'--	'--	'--	TRUE	'--	'--	No	'--	'--	FFPE	Primary Tumor	1	'--	released	'--	'--	'--	Not Reported	'--	'--	'--
TCGA-THCA	8a8e05aa-f13a-4142-a335-7aafbee7b664	TCGA-FY-A40K	efca856e-8a83-4de2-b054-c64ade21962c	TCGA-FY-A40K-01Z	'--	'--	'--	'--	'--	'--	0	'--	'--	'--	'--	'--	'--	'--	TRUE	'--	'--	No	'--	'--	FFPE	Primary Tumor	1	'--	released	'--	'--	'--	Not Reported	'--	'--	'--
TCGA-THCA	8a8e05aa-f13a-4142-a335-7aafbee7b664	TCGA-FY-A40K	1acbfb18-8abd-400c-9a09-31b961f12a76	TCGA-FY-A40K-10A	'--	'--	'--	'--	'--	58	'--	'--	'--	'--	'--	'--	'--	'--	FALSE	'--	'--	false	'--	'--	'--	Blood Derived Normal	10	'--	released	'--	'--	'--	Not Reported	'--	'--	'--
TCGA-THCA	8a8e05aa-f13a-4142-a335-7aafbee7b664	TCGA-FY-A40K	4e8151fb-47c7-4994-a494-5740010233b8	TCGA-FY-A40K-01A	'--	'--	'--	'--	'--	58	'--	'--	'--	'--	'--	'--	30.0	'--	FALSE	'--	'--	false	'--	EEF7A2AF-C12B-49F5-91CE-458B62D3F4D7	'--	Primary Tumor	1	'--	released	'--	'--	'--	Not Reported	'--	'--	'--
TCGA-THCA	b305b716-5ae5-421b-b3c9-0824d37b08a8	TCGA-DJ-A3VB	8d53f17e-fe6f-4693-a19f-efa067c54b50	TCGA-DJ-A3VB-01Z	'--	'--	'--	'--	'--	'--	0	'--	'--	'--	'--	'--	'--	'--	TRUE	'--	'--	No	'--	'--	FFPE	Primary Tumor	1	'--	released	'--	'--	'--	Not Reported	'--	'--	'--
TCGA-THCA	b305b716-5ae5-421b-b3c9-0824d37b08a8	TCGA-DJ-A3VB	23fc8620-437c-406d-8886-5c159ca87576	TCGA-DJ-A3VB-10A	'--	'--	'--	'--	'--	273	'--	'--	'--	'--	'--	'--	'--	'--	FALSE	'--	'--	false	'--	'--	'--	Blood Derived Normal	10	'--	released	'--	'--	'--	Not Reported	'--	'--	'--
TCGA-THCA	b305b716-5ae5-421b-b3c9-0824d37b08a8	TCGA-DJ-A3VB	e3325e6d-c54e-47c2-a50c-e4071312dfc9	TCGA-DJ-A3VB-01A	'--	'--	'--	'--	'--	273	'--	'--	'--	'--	'--	'--	670.0	'--	FALSE	'--	'--	true	'--	CAE279C4-3563-419D-9BC7-9FB54A3C58FD	'--	Primary Tumor	1	'--	released	'--	'--	'--	Not Reported	'--	'--	'--
TCGA-THCA	e1ff7694-64e1-47ed-b0d8-34acfb4ffef1	TCGA-L6-A4ET	34e4f16c-4bff-4d0b-8ed6-c80a4638c260	TCGA-L6-A4ET-01Z	'--	'--	'--	'--	'--	'--	0	'--	'--	'--	'--	'--	'--	'--	TRUE	'--	'--	No	'--	'--	FFPE	Primary Tumor	1	'--	released	'--	'--	'--	Not Reported	'--	'--	'--
TCGA-THCA	e1ff7694-64e1-47ed-b0d8-34acfb4ffef1	TCGA-L6-A4ET	d6183bca-9a4d-41ac-940d-0eaa23decf56	TCGA-L6-A4ET-01A	'--	'--	'--	'--	'--	282	'--	'--	'--	'--	'--	'--	230.0	'--	FALSE	'--	'--	true	'--	71EC1611-E8A2-4692-8C6A-9FF1DEC0AE85	'--	Primary Tumor	1	'--	released	'--	'--	'--	Not Reported	'--	'--	'--
TCGA-THCA	e1ff7694-64e1-47ed-b0d8-34acfb4ffef1	TCGA-L6-A4ET	702d6dd2-8f98-48f1-8f34-de812d5b717a	TCGA-L6-A4ET-10A	'--	'--	'--	'--	'--	282	'--	'--	'--	'--	'--	'--	'--	'--	FALSE	'--	'--	true	'--	'--	'--	Blood Derived Normal	10	'--	released	'--	'--	'--	Not Reported	'--	'--	'--
TCGA-THCA	e28e35b1-eb58-45bb-b19a-958187227500	TCGA-IM-A420	39dd3c5f-013a-4a71-9376-e4dc6114434b	TCGA-IM-A420-10A	'--	'--	'--	'--	'--	56	'--	'--	'--	'--	'--	'--	'--	'--	FALSE	'--	'--	false	'--	'--	'--	Blood Derived Normal	10	'--	released	'--	'--	'--	Not Reported	'--	'--	'--
TCGA-THCA	e28e35b1-eb58-45bb-b19a-958187227500	TCGA-IM-A420	34ef227d-52b5-45f5-8464-b449798b2176	TCGA-IM-A420-01Z	'--	'--	'--	'--	'--	'--	0	'--	'--	'--	'--	'--	'--	'--	TRUE	'--	'--	No	'--	'--	FFPE	Primary Tumor	1	'--	released	'--	'--	'--	Not Reported	'--	'--	'--
TCGA-THCA	e28e35b1-eb58-45bb-b19a-958187227500	TCGA-IM-A420	e1b11d66-3258-402f-ae1d-a7dedd46a3fa	TCGA-IM-A420-01A	'--	'--	'--	'--	'--	56	'--	'--	'--	'--	'--	'--	80.0	'--	FALSE	'--	'--	true	'--	537FAAE7-E834-4BC0-BDC9-0292CB4B2FCC	'--	Primary Tumor	1	'--	released	'--	'--	'--	Not Reported	'--	'--	'--
TCGA-THCA	45eefba8-9f7c-49e9-a3f5-d13cfa264ff6	TCGA-DJ-A3UU	90d4dd06-95c8-4114-8e99-433a28adb7d4	TCGA-DJ-A3UU-01A	'--	'--	'--	'--	'--	520	'--	'--	'--	'--	'--	'--	200.0	'--	FALSE	'--	'--	true	'--	0345F565-DA23-40AC-8083-E74922DADF5F	'--	Primary Tumor	1	'--	released	'--	'--	'--	Not Reported	'--	'--	'--
TCGA-THCA	45eefba8-9f7c-49e9-a3f5-d13cfa264ff6	TCGA-DJ-A3UU	ad21f11c-b277-44b4-9595-398bdd9fec46	TCGA-DJ-A3UU-10A	'--	'--	'--	'--	'--	520	'--	'--	'--	'--	'--	'--	'--	'--	FALSE	'--	'--	false	'--	'--	'--	Blood Derived Normal	10	'--	released	'--	'--	'--	Not Reported	'--	'--	'--
TCGA-THCA	45eefba8-9f7c-49e9-a3f5-d13cfa264ff6	TCGA-DJ-A3UU	2535c166-452b-4d66-9ff5-d9c689c4921c	TCGA-DJ-A3UU-01Z	'--	'--	'--	'--	'--	'--	0	'--	'--	'--	'--	'--	'--	'--	TRUE	'--	'--	No	'--	'--	FFPE	Primary Tumor	1	'--	released	'--	'--	'--	Not Reported	'--	'--	'--
TCGA-THCA	762eddb5-1b47-4b79-b20a-1edfb07c0705	TCGA-EM-A1CV	449b0789-b12b-43eb-ab63-960ca4b24122	TCGA-EM-A1CV-10A	'--	'--	'--	'--	'--	54	'--	'--	'--	'--	'--	'--	'--	'--	FALSE	'--	'--	false	'--	'--	'--	Blood Derived Normal	10	'--	released	'--	'--	'--	Not Reported	'--	'--	'--
TCGA-THCA	762eddb5-1b47-4b79-b20a-1edfb07c0705	TCGA-EM-A1CV	e28b4bc3-579a-4af0-b636-31ee82c00eec	TCGA-EM-A1CV-01Z	'--	'--	'--	'--	'--	'--	0	'--	'--	'--	'--	'--	'--	'--	TRUE	'--	'--	No	'--	'--	FFPE	Primary Tumor	1	'--	released	'--	'--	'--	Not Reported	'--	'--	'--
TCGA-THCA	762eddb5-1b47-4b79-b20a-1edfb07c0705	TCGA-EM-A1CV	95d077b1-e4f3-48ea-84bc-f663fd438693	TCGA-EM-A1CV-01A	'--	'--	'--	'--	'--	54	'--	'--	'--	'--	'--	'--	140.0	'--	FALSE	'--	'--	false	'--	02C9BA4F-692D-4658-ABE4-89C22A0D512F	'--	Primary Tumor	1	'--	released	'--	'--	'--	Not Reported	'--	'--	'--
TCGA-THCA	762eddb5-1b47-4b79-b20a-1edfb07c0705	TCGA-EM-A1CV	b8989340-7811-4e27-a879-ec0d193715e7	TCGA-EM-A1CV-11A	'--	'--	'--	'--	'--	54	'--	'--	'--	'--	'--	'--	120.0	'--	FALSE	'--	'--	false	'--	'--	'--	Solid Tissue Normal	11	'--	released	'--	'--	'--	Not Reported	'--	'--	'--
TCGA-THCA	59681e8f-cf57-47b4-82e1-6be8ead9583e	TCGA-ET-A2MX	21627f0d-c6bd-436e-8129-db340c15552a	TCGA-ET-A2MX-11C	'--	'--	'--	'--	'--	1710	'--	'--	'--	'--	'--	'--	30.0	'--	FALSE	'--	'--	true	'--	'--	'--	Solid Tissue Normal	11	'--	released	'--	'--	'--	Not Reported	'--	'--	'--
TCGA-THCA	59681e8f-cf57-47b4-82e1-6be8ead9583e	TCGA-ET-A2MX	49230e8c-3e14-4cbc-8b4b-3918cec4e3c5	TCGA-ET-A2MX-01Z	'--	'--	'--	'--	'--	'--	0	'--	'--	'--	'--	'--	'--	'--	TRUE	'--	'--	No	'--	'--	FFPE	Primary Tumor	1	'--	released	'--	'--	'--	Not Reported	'--	'--	'--
TCGA-THCA	59681e8f-cf57-47b4-82e1-6be8ead9583e	TCGA-ET-A2MX	a7b8c025-bdd4-4fd2-b3fd-47e5c0432f90	TCGA-ET-A2MX-01A	'--	'--	'--	'--	'--	1359	'--	'--	'--	'--	'--	'--	220.0	'--	FALSE	'--	'--	true	'--	302C0407-0160-499B-AD2C-496E8C3E2BDF	'--	Primary Tumor	1	'--	released	'--	'--	'--	Not Reported	'--	'--	'--
TCGA-THCA	b46d88e9-8477-4900-8da9-5e7dbded0653	TCGA-ET-A3DV	96a60fa6-ffa5-4439-9611-65b7e33db4fe	TCGA-ET-A3DV-01Z	'--	'--	'--	'--	'--	'--	0	'--	'--	'--	'--	'--	'--	'--	TRUE	'--	'--	No	'--	'--	FFPE	Primary Tumor	1	'--	released	'--	'--	'--	Not Reported	'--	'--	'--
TCGA-THCA	b46d88e9-8477-4900-8da9-5e7dbded0653	TCGA-ET-A3DV	ce24fe0a-5c4d-4fbe-a02c-76345eaa2892	TCGA-ET-A3DV-01A	'--	'--	'--	'--	'--	3815	'--	'--	'--	'--	'--	'--	100.0	'--	FALSE	'--	'--	true	'--	D95F4F07-87EC-4668-ADC6-95BB3B097DB1	'--	Primary Tumor	1	'--	released	'--	'--	'--	Not Reported	'--	'--	'--
TCGA-THCA	b46d88e9-8477-4900-8da9-5e7dbded0653	TCGA-ET-A3DV	d2a252b0-5998-436b-b2a5-2bd59d064d80	TCGA-ET-A3DV-11A	'--	'--	'--	'--	'--	3815	'--	'--	'--	'--	'--	'--	60.0	'--	FALSE	'--	'--	true	'--	'--	'--	Solid Tissue Normal	11	'--	released	'--	'--	'--	Not Reported	'--	'--	'--
TCGA-THCA	989e9202-c08e-4bbf-85b3-1e278a475cb7	TCGA-EL-A3T8	6961dfa4-a986-4ed0-96dd-675177a4fee2	TCGA-EL-A3T8-01A	'--	'--	'--	'--	'--	2568	'--	'--	'--	'--	'--	'--	260.0	'--	FALSE	'--	'--	true	'--	D4D61A70-B4EA-4BAA-9C53-C5AF927D6FD5	'--	Primary Tumor	1	'--	released	'--	'--	'--	Not Reported	'--	'--	'--
TCGA-THCA	989e9202-c08e-4bbf-85b3-1e278a475cb7	TCGA-EL-A3T8	f0a15f7d-a14f-484a-a87c-43f00c8833cc	TCGA-EL-A3T8-01Z	'--	'--	'--	'--	'--	'--	0	'--	'--	'--	'--	'--	'--	'--	TRUE	'--	'--	No	'--	'--	FFPE	Primary Tumor	1	'--	released	'--	'--	'--	Not Reported	'--	'--	'--
TCGA-THCA	989e9202-c08e-4bbf-85b3-1e278a475cb7	TCGA-EL-A3T8	a29ceeca-6198-4d69-afd2-252f76f2a21d	TCGA-EL-A3T8-11A	'--	'--	'--	'--	'--	2568	'--	'--	'--	'--	'--	'--	'--	'--	FALSE	'--	'--	true	'--	'--	'--	Solid Tissue Normal	11	'--	released	'--	'--	'--	Not Reported	'--	'--	'--
TCGA-THCA	c53c4bfe-d9d2-4882-a46b-fa487d95b8ba	TCGA-DJ-A4UR	ee7bbee7-b6f5-49cb-8a25-b7b6ccf2710b	TCGA-DJ-A4UR-01A	'--	'--	'--	'--	'--	216	'--	'--	'--	'--	'--	'--	150.0	'--	FALSE	'--	'--	true	'--	E27BD8E1-D5E4-4506-83D1-FF05EF12C3B4	'--	Primary Tumor	1	'--	released	'--	'--	'--	Not Reported	'--	'--	'--
TCGA-THCA	c53c4bfe-d9d2-4882-a46b-fa487d95b8ba	TCGA-DJ-A4UR	115d8656-42bb-4e23-a830-332eaf6d8ddd	TCGA-DJ-A4UR-10A	'--	'--	'--	'--	'--	216	'--	'--	'--	'--	'--	'--	'--	'--	FALSE	'--	'--	false	'--	'--	'--	Blood Derived Normal	10	'--	released	'--	'--	'--	Not Reported	'--	'--	'--
TCGA-THCA	c53c4bfe-d9d2-4882-a46b-fa487d95b8ba	TCGA-DJ-A4UR	b3c75077-a115-4780-9f58-51c7c74a26f7	TCGA-DJ-A4UR-01Z	'--	'--	'--	'--	'--	'--	0	'--	'--	'--	'--	'--	'--	'--	TRUE	'--	'--	No	'--	'--	FFPE	Primary Tumor	1	'--	released	'--	'--	'--	Not Reported	'--	'--	'--
TCGA-THCA	82dd133b-691b-4bbf-b948-6270869d9b69	TCGA-DO-A2HM	35b985a9-13a2-46c6-989b-4eec6cd28b92	TCGA-DO-A2HM-10B	'--	'--	'--	'--	'--	93	'--	'--	'--	'--	'--	'--	'--	'--	FALSE	'--	'--	false	'--	'--	'--	Blood Derived Normal	10	'--	released	'--	'--	'--	Not Reported	'--	'--	'--
TCGA-THCA	82dd133b-691b-4bbf-b948-6270869d9b69	TCGA-DO-A2HM	4b998ebc-2894-46c7-b1a0-14a141d3fb89	TCGA-DO-A2HM-01B	'--	'--	'--	'--	'--	93	'--	'--	'--	'--	'--	'--	80.0	'--	FALSE	'--	'--	false	'--	5AE4F173-F97A-43E6-904C-F179DA6FFCF1	'--	Primary Tumor	1	'--	released	'--	'--	'--	Not Reported	'--	'--	'--
TCGA-THCA	82dd133b-691b-4bbf-b948-6270869d9b69	TCGA-DO-A2HM	07db0c38-ff3c-4b39-9dca-2df7cf52623f	TCGA-DO-A2HM-01Z	'--	'--	'--	'--	'--	'--	0	'--	'--	'--	'--	'--	'--	'--	TRUE	'--	'--	No	'--	'--	FFPE	Primary Tumor	1	'--	released	'--	'--	'--	Not Reported	'--	'--	'--
TCGA-THCA	212b2002-1ebf-47dd-82f8-6c0b904cf909	TCGA-EM-A2CR	2f7c1f7e-0b85-41b7-9dbf-5e73f0d23551	TCGA-EM-A2CR-01Z	'--	'--	'--	'--	'--	'--	0	'--	'--	'--	'--	'--	'--	'--	TRUE	'--	'--	No	'--	'--	FFPE	Primary Tumor	1	'--	released	'--	'--	'--	Not Reported	'--	'--	'--
TCGA-THCA	212b2002-1ebf-47dd-82f8-6c0b904cf909	TCGA-EM-A2CR	07fdc6f9-9689-4efc-b0e4-64664b6e3916	TCGA-EM-A2CR-10A	'--	'--	'--	'--	'--	222	'--	'--	'--	'--	'--	'--	'--	'--	FALSE	'--	'--	false	'--	'--	'--	Blood Derived Normal	10	'--	released	'--	'--	'--	Not Reported	'--	'--	'--
TCGA-THCA	212b2002-1ebf-47dd-82f8-6c0b904cf909	TCGA-EM-A2CR	6e1cba50-1b4c-40f3-b847-c88fb1f64c2a	TCGA-EM-A2CR-01A	'--	'--	'--	'--	'--	132	'--	'--	'--	'--	'--	'--	100.0	'--	FALSE	'--	'--	false	'--	9E95A9A3-0E7C-462A-8C9C-8005161A918B	'--	Primary Tumor	1	'--	released	'--	'--	'--	Not Reported	'--	'--	'--
TCGA-THCA	1f094db9-f8cc-4066-adff-609682936172	TCGA-DJ-A2QC	a48d73e7-d249-4827-b0a7-a9a583c2f0ad	TCGA-DJ-A2QC-01Z	'--	'--	'--	'--	'--	'--	0	'--	'--	'--	'--	'--	'--	'--	TRUE	'--	'--	No	'--	'--	FFPE	Primary Tumor	1	'--	released	'--	'--	'--	Not Reported	'--	'--	'--
TCGA-THCA	1f094db9-f8cc-4066-adff-609682936172	TCGA-DJ-A2QC	8b96223d-f8b1-4a16-82d1-f8b68206c964	TCGA-DJ-A2QC-10A	'--	'--	'--	'--	'--	237	'--	'--	'--	'--	'--	'--	'--	'--	FALSE	'--	'--	false	'--	'--	'--	Blood Derived Normal	10	'--	released	'--	'--	'--	Not Reported	'--	'--	'--
TCGA-THCA	1f094db9-f8cc-4066-adff-609682936172	TCGA-DJ-A2QC	392c23ad-b249-4432-ba8f-5ad501206e2d	TCGA-DJ-A2QC-01A	'--	'--	'--	'--	'--	237	'--	'--	'--	'--	'--	'--	230.0	'--	FALSE	'--	'--	true	'--	56AEDDE4-62FD-4D06-BA3A-018ABA76D383	'--	Primary Tumor	1	'--	released	'--	'--	'--	Not Reported	'--	'--	'--
TCGA-THCA	9d3f6163-f586-4974-babc-67b5163b706b	TCGA-DJ-A3UT	c4dfc841-9ffe-4b97-ab9f-7b89ecdd4b72	TCGA-DJ-A3UT-01Z	'--	'--	'--	'--	'--	'--	0	'--	'--	'--	'--	'--	'--	'--	TRUE	'--	'--	No	'--	'--	FFPE	Primary Tumor	1	'--	released	'--	'--	'--	Not Reported	'--	'--	'--
TCGA-THCA	9d3f6163-f586-4974-babc-67b5163b706b	TCGA-DJ-A3UT	68764cce-82ca-4a2c-833a-2edd79abf5ff	TCGA-DJ-A3UT-01A	'--	'--	'--	'--	'--	464	'--	'--	'--	'--	'--	'--	70.0	'--	FALSE	'--	'--	true	'--	EAA7A141-7F59-4016-AC23-25F324A33DEA	'--	Primary Tumor	1	'--	released	'--	'--	'--	Not Reported	'--	'--	'--
TCGA-THCA	9d3f6163-f586-4974-babc-67b5163b706b	TCGA-DJ-A3UT	a22d93f6-9c95-41d1-b23a-9c55facf9f53	TCGA-DJ-A3UT-10A	'--	'--	'--	'--	'--	464	'--	'--	'--	'--	'--	'--	'--	'--	FALSE	'--	'--	false	'--	'--	'--	Blood Derived Normal	10	'--	released	'--	'--	'--	Not Reported	'--	'--	'--
TCGA-THCA	641ba101-135b-4395-9360-2058fabfed56	TCGA-EL-A3CL	1d344fc4-8ec8-42a5-b27c-94f409879755	TCGA-EL-A3CL-01Z	'--	'--	'--	'--	'--	'--	0	'--	'--	'--	'--	'--	'--	'--	TRUE	'--	'--	No	'--	'--	FFPE	Primary Tumor	1	'--	released	'--	'--	'--	Not Reported	'--	'--	'--
TCGA-THCA	641ba101-135b-4395-9360-2058fabfed56	TCGA-EL-A3CL	80c2eef7-e6dc-41aa-b98b-0877eadc5c38	TCGA-EL-A3CL-01A	'--	'--	'--	'--	'--	6425	'--	'--	'--	'--	'--	'--	190.0	'--	FALSE	'--	'--	true	'--	321767E5-697C-4958-9766-F25745B3D1D5	'--	Primary Tumor	1	'--	released	'--	'--	'--	Not Reported	'--	'--	'--
TCGA-THCA	641ba101-135b-4395-9360-2058fabfed56	TCGA-EL-A3CL	dbf0ed66-d8df-4418-b559-acbb26122987	TCGA-EL-A3CL-10A	'--	'--	'--	'--	'--	6425	'--	'--	'--	'--	'--	'--	'--	'--	FALSE	'--	'--	false	'--	'--	'--	Blood Derived Normal	10	'--	released	'--	'--	'--	Not Reported	'--	'--	'--
TCGA-THCA	6befdc6a-27fc-4cde-979b-ffe05cd8603f	TCGA-ET-A40Q	0fd128aa-e2d7-4aa4-ae28-a6445806d381	TCGA-ET-A40Q-01Z	'--	'--	'--	'--	'--	'--	0	'--	'--	'--	'--	'--	'--	'--	TRUE	'--	'--	No	'--	'--	FFPE	Primary Tumor	1	'--	released	'--	'--	'--	Not Reported	'--	'--	'--
TCGA-THCA	6befdc6a-27fc-4cde-979b-ffe05cd8603f	TCGA-ET-A40Q	1cff1634-ad89-4fef-bbbc-13e4cd7ccdd2	TCGA-ET-A40Q-10A	'--	'--	'--	'--	'--	428	'--	'--	'--	'--	'--	'--	'--	'--	FALSE	'--	'--	false	'--	'--	'--	Blood Derived Normal	10	'--	released	'--	'--	'--	Not Reported	'--	'--	'--
TCGA-THCA	6befdc6a-27fc-4cde-979b-ffe05cd8603f	TCGA-ET-A40Q	6c92a78f-ec4c-4ae6-849a-7abdd976bbad	TCGA-ET-A40Q-01A	'--	'--	'--	'--	'--	428	'--	'--	'--	'--	'--	'--	140.0	'--	FALSE	'--	'--	true	'--	D0250E29-21AE-4A68-B3F4-2DD739A5D088	'--	Primary Tumor	1	'--	released	'--	'--	'--	Not Reported	'--	'--	'--
TCGA-THCA	ea859a83-00c3-40b2-97c1-fb24ad027ea6	TCGA-EL-A3ZP	6937beb3-2941-40f5-82df-f7eb8dbc10b8	TCGA-EL-A3ZP-01A	'--	'--	'--	'--	'--	1393	'--	'--	'--	'--	'--	'--	270.0	'--	FALSE	'--	'--	false	'--	8035BE61-91DD-41FB-ABC8-77BE24327645	'--	Primary Tumor	1	'--	released	'--	'--	'--	Not Reported	'--	'--	'--
TCGA-THCA	ea859a83-00c3-40b2-97c1-fb24ad027ea6	TCGA-EL-A3ZP	592666b1-8d65-4239-b2b3-cf68e139d956	TCGA-EL-A3ZP-01Z	'--	'--	'--	'--	'--	'--	0	'--	'--	'--	'--	'--	'--	'--	TRUE	'--	'--	No	'--	'--	FFPE	Primary Tumor	1	'--	released	'--	'--	'--	Not Reported	'--	'--	'--
TCGA-THCA	ea859a83-00c3-40b2-97c1-fb24ad027ea6	TCGA-EL-A3ZP	25fe8c65-4175-489f-b5d0-ef527e753dac	TCGA-EL-A3ZP-11A	'--	'--	'--	'--	'--	1393	'--	'--	'--	'--	'--	'--	270.0	'--	FALSE	'--	'--	false	'--	'--	'--	Solid Tissue Normal	11	'--	released	'--	'--	'--	Not Reported	'--	'--	'--
TCGA-THCA	7851512b-5f44-43de-8b27-99b5e91a8119	TCGA-DJ-A4UL	2a5ea785-8e30-4113-ae27-1ca28c30ca5f	TCGA-DJ-A4UL-10A	'--	'--	'--	'--	'--	244	'--	'--	'--	'--	'--	'--	'--	'--	FALSE	'--	'--	false	'--	'--	'--	Blood Derived Normal	10	'--	released	'--	'--	'--	Not Reported	'--	'--	'--
TCGA-THCA	7851512b-5f44-43de-8b27-99b5e91a8119	TCGA-DJ-A4UL	83fca567-ac9f-4888-a9ad-e766ca0b322f	TCGA-DJ-A4UL-01A	'--	'--	'--	'--	'--	244	'--	'--	'--	'--	'--	'--	340.0	'--	FALSE	'--	'--	true	'--	335DABDB-7CD0-4035-A46E-505EB4BF0359	'--	Primary Tumor	1	'--	released	'--	'--	'--	Not Reported	'--	'--	'--
TCGA-THCA	7851512b-5f44-43de-8b27-99b5e91a8119	TCGA-DJ-A4UL	ffcf6eec-1752-4b09-8c7d-5c3f7fa2dfb4	TCGA-DJ-A4UL-01Z	'--	'--	'--	'--	'--	'--	0	'--	'--	'--	'--	'--	'--	'--	TRUE	'--	'--	No	'--	'--	FFPE	Primary Tumor	1	'--	released	'--	'--	'--	Not Reported	'--	'--	'--
TCGA-THCA	97d0e1bb-1459-4124-b25a-48195f2ad8b5	TCGA-EL-A3T1	d302974b-3d6f-4ff9-8ecb-aa2eda5fd160	TCGA-EL-A3T1-01Z	'--	'--	'--	'--	'--	'--	0	'--	'--	'--	'--	'--	'--	'--	TRUE	'--	'--	No	'--	'--	FFPE	Primary Tumor	1	'--	released	'--	'--	'--	Not Reported	'--	'--	'--
TCGA-THCA	97d0e1bb-1459-4124-b25a-48195f2ad8b5	TCGA-EL-A3T1	5acaa0e9-9169-4a95-811d-16c6880a6c06	TCGA-EL-A3T1-11A	'--	'--	'--	'--	'--	3629	'--	'--	'--	'--	'--	'--	240.0	'--	FALSE	'--	'--	true	'--	'--	'--	Solid Tissue Normal	11	'--	released	'--	'--	'--	Not Reported	'--	'--	'--
TCGA-THCA	97d0e1bb-1459-4124-b25a-48195f2ad8b5	TCGA-EL-A3T1	62114abf-0f25-4521-9cf2-ca591f931b4f	TCGA-EL-A3T1-01A	'--	'--	'--	'--	'--	3629	'--	'--	'--	'--	'--	'--	240.0	'--	FALSE	'--	'--	true	'--	9801ADBD-282E-494E-B703-BD1DB5CE4FC5	'--	Primary Tumor	1	'--	released	'--	'--	'--	Not Reported	'--	'--	'--
TCGA-THCA	6ba76174-620e-4851-857a-d0adbfd6f3e6	TCGA-BJ-A28Z	d186595f-2f60-4da1-9e19-ef9866667cbc	TCGA-BJ-A28Z-10A	'--	'--	'--	'--	'--	50	'--	'--	'--	'--	'--	'--	'--	'--	FALSE	'--	'--	false	'--	'--	'--	Blood Derived Normal	10	'--	released	'--	'--	'--	Not Reported	'--	'--	'--
TCGA-THCA	6ba76174-620e-4851-857a-d0adbfd6f3e6	TCGA-BJ-A28Z	65053a12-dfdf-48ca-8971-db01357b6fca	TCGA-BJ-A28Z-01Z	'--	'--	'--	'--	'--	'--	0	'--	'--	'--	'--	'--	'--	'--	TRUE	'--	'--	No	'--	'--	FFPE	Primary Tumor	1	'--	released	'--	'--	'--	Not Reported	'--	'--	'--
TCGA-THCA	6ba76174-620e-4851-857a-d0adbfd6f3e6	TCGA-BJ-A28Z	d9689254-afe2-4544-af54-e02670bd5ebd	TCGA-BJ-A28Z-01A	'--	'--	'--	'--	'--	50	'--	'--	'--	'--	'--	'--	130.0	'--	FALSE	'--	'--	true	'--	C0AFDCE6-F0D8-473C-A584-25DD53E2F832	'--	Primary Tumor	1	'--	released	'--	'--	'--	Not Reported	'--	'--	'--
TCGA-THCA	3b48cc5e-3396-4dd5-893d-54b75b98b016	TCGA-DJ-A13W	e8a49214-5810-42dd-94b3-7fd1a007958f	TCGA-DJ-A13W-01Z	'--	'--	'--	'--	'--	'--	0	'--	'--	'--	'--	'--	'--	'--	TRUE	'--	'--	No	'--	'--	FFPE	Primary Tumor	1	'--	released	'--	'--	'--	Not Reported	'--	'--	'--
TCGA-THCA	3b48cc5e-3396-4dd5-893d-54b75b98b016	TCGA-DJ-A13W	4dca97a5-b0e5-4383-8cc5-b6ff07741647	TCGA-DJ-A13W-01A	'--	'--	'--	'--	'--	307	'--	'--	'--	'--	'--	'--	440.0	'--	FALSE	'--	'--	true	'--	00FB68C5-7946-4E69-9019-4E8BF9EB6A94	'--	Primary Tumor	1	'--	released	'--	'--	'--	Not Reported	'--	'--	'--
TCGA-THCA	3b48cc5e-3396-4dd5-893d-54b75b98b016	TCGA-DJ-A13W	c6eaf3f8-dd7d-4b38-bf42-8a53aafab259	TCGA-DJ-A13W-10A	'--	'--	'--	'--	'--	307	'--	'--	'--	'--	'--	'--	'--	'--	FALSE	'--	'--	false	'--	'--	'--	Blood Derived Normal	10	'--	released	'--	'--	'--	Not Reported	'--	'--	'--
TCGA-THCA	c93c47f4-88f3-405a-85f4-ba9450b74522	TCGA-J8-A3YE	ddd464c6-4da1-4af2-831a-40fd67dc97b8	TCGA-J8-A3YE-01Z	'--	'--	'--	'--	'--	'--	0	'--	'--	'--	'--	'--	'--	'--	TRUE	'--	'--	No	'--	'--	FFPE	Primary Tumor	1	'--	released	'--	'--	'--	Not Reported	'--	'--	'--
TCGA-THCA	c93c47f4-88f3-405a-85f4-ba9450b74522	TCGA-J8-A3YE	84279846-407c-4b78-9931-ba2774e3ec71	TCGA-J8-A3YE-10A	'--	'--	'--	'--	'--	856	'--	'--	'--	'--	'--	'--	'--	'--	FALSE	'--	'--	false	'--	'--	'--	Blood Derived Normal	10	'--	released	'--	'--	'--	Not Reported	'--	'--	'--
TCGA-THCA	c93c47f4-88f3-405a-85f4-ba9450b74522	TCGA-J8-A3YE	e16f6015-39c9-4080-8114-6788cab77f2d	TCGA-J8-A3YE-01A	'--	'--	'--	'--	'--	856	'--	'--	'--	'--	'--	'--	80.0	'--	FALSE	'--	'--	true	'--	79B8945B-D78D-424C-BACE-32042C7D2D8A	'--	Primary Tumor	1	'--	released	'--	'--	'--	Not Reported	'--	'--	'--
TCGA-THCA	4d9de9a1-7df1-412e-9f16-15dd51b4c5f5	TCGA-E8-A242	cff0c8f3-b523-4da6-aa9f-1343df32216e	TCGA-E8-A242-01Z	'--	'--	'--	'--	'--	'--	0	'--	'--	'--	'--	'--	'--	'--	TRUE	'--	'--	No	'--	'--	FFPE	Primary Tumor	1	'--	released	'--	'--	'--	Not Reported	'--	'--	'--
TCGA-THCA	4d9de9a1-7df1-412e-9f16-15dd51b4c5f5	TCGA-E8-A242	225b76ad-db11-457a-9a77-e1f333895e5c	TCGA-E8-A242-01A	'--	'--	'--	'--	'--	69	'--	'--	'--	'--	'--	'--	270.0	'--	FALSE	'--	'--	true	'--	09B63616-A074-472B-80AA-FCBE71863FA9	'--	Primary Tumor	1	'--	released	'--	'--	'--	Not Reported	'--	'--	'--
TCGA-THCA	4d9de9a1-7df1-412e-9f16-15dd51b4c5f5	TCGA-E8-A242	490fb30a-5455-48ed-95c9-86d044a364b7	TCGA-E8-A242-10A	'--	'--	'--	'--	'--	69	'--	'--	'--	'--	'--	'--	'--	'--	FALSE	'--	'--	false	'--	'--	'--	Blood Derived Normal	10	'--	released	'--	'--	'--	Not Reported	'--	'--	'--
TCGA-THCA	ebbd54ad-7b97-4081-ad11-7f7f3ce74eef	TCGA-E8-A418	f5800a35-2545-4423-89d4-fe70545ed76f	TCGA-E8-A418-10A	'--	'--	'--	'--	'--	205	'--	'--	'--	'--	'--	'--	'--	'--	FALSE	'--	'--	false	'--	'--	'--	Blood Derived Normal	10	'--	released	'--	'--	'--	Not Reported	'--	'--	'--
TCGA-THCA	ebbd54ad-7b97-4081-ad11-7f7f3ce74eef	TCGA-E8-A418	979cbb75-28d9-4d33-8083-077c25bddfd6	TCGA-E8-A418-01A	'--	'--	'--	'--	'--	205	'--	'--	'--	'--	'--	'--	1120.0	'--	FALSE	'--	'--	true	'--	C05826F0-A01B-45AB-BB4E-38996D815CD2	'--	Primary Tumor	1	'--	released	'--	'--	'--	Not Reported	'--	'--	'--
TCGA-THCA	ebbd54ad-7b97-4081-ad11-7f7f3ce74eef	TCGA-E8-A418	76c7c02f-0f1c-477c-9126-3c844729e4f8	TCGA-E8-A418-01Z	'--	'--	'--	'--	'--	'--	0	'--	'--	'--	'--	'--	'--	'--	TRUE	'--	'--	No	'--	'--	FFPE	Primary Tumor	1	'--	released	'--	'--	'--	Not Reported	'--	'--	'--
TCGA-THCA	0314b145-2f3a-4a90-a580-375b5f0a63a4	TCGA-H2-A3RH	1a9e811d-1c60-409c-a7d2-1d58afa473e9	TCGA-H2-A3RH-01A	'--	'--	'--	'--	'--	114	'--	'--	'--	'--	'--	'--	90.0	'--	FALSE	'--	'--	false	'--	4F197857-EB50-4345-BAD0-05D27B02D06D	'--	Primary Tumor	1	'--	released	'--	'--	'--	Not Reported	'--	'--	'--
TCGA-THCA	0314b145-2f3a-4a90-a580-375b5f0a63a4	TCGA-H2-A3RH	5bda33b8-52c2-48b6-a557-5c52e91d4679	TCGA-H2-A3RH-10A	'--	'--	'--	'--	'--	114	'--	'--	'--	'--	'--	'--	'--	'--	FALSE	'--	'--	false	'--	'--	'--	Blood Derived Normal	10	'--	released	'--	'--	'--	Not Reported	'--	'--	'--
TCGA-THCA	0314b145-2f3a-4a90-a580-375b5f0a63a4	TCGA-H2-A3RH	f883337c-86df-4a79-aaab-41e95700a9b2	TCGA-H2-A3RH-01Z	'--	'--	'--	'--	'--	'--	0	'--	'--	'--	'--	'--	'--	'--	TRUE	'--	'--	No	'--	'--	FFPE	Primary Tumor	1	'--	released	'--	'--	'--	Not Reported	'--	'--	'--
TCGA-THCA	9348c35a-58ba-4db5-bc4a-e9fc8e07cdf3	TCGA-IM-A41Z	192aaedc-108f-4d5e-9fa5-49c6523f0f29	TCGA-IM-A41Z-01A	'--	'--	'--	'--	'--	106	'--	'--	'--	'--	'--	'--	40.0	'--	FALSE	'--	'--	true	'--	7AAD4353-9E3F-4463-B8F3-3DB28C749829	'--	Primary Tumor	1	'--	released	'--	'--	'--	Not Reported	'--	'--	'--
TCGA-THCA	9348c35a-58ba-4db5-bc4a-e9fc8e07cdf3	TCGA-IM-A41Z	2c4ad1d1-2a89-4556-8ab3-10106ed5fac8	TCGA-IM-A41Z-10A	'--	'--	'--	'--	'--	106	'--	'--	'--	'--	'--	'--	'--	'--	FALSE	'--	'--	false	'--	'--	'--	Blood Derived Normal	10	'--	released	'--	'--	'--	Not Reported	'--	'--	'--
TCGA-THCA	9348c35a-58ba-4db5-bc4a-e9fc8e07cdf3	TCGA-IM-A41Z	b522348f-451b-4ffd-b1fe-6d8b017f230a	TCGA-IM-A41Z-01Z	'--	'--	'--	'--	'--	'--	0	'--	'--	'--	'--	'--	'--	'--	TRUE	'--	'--	No	'--	'--	FFPE	Primary Tumor	1	'--	released	'--	'--	'--	Not Reported	'--	'--	'--
TCGA-THCA	905469d2-4c97-4293-a20c-1b1f0462a25d	TCGA-FY-A3R6	13711d44-7a61-43ef-a89b-a04fb762f9d0	TCGA-FY-A3R6-10A	'--	'--	'--	'--	'--	101	'--	'--	'--	'--	'--	'--	'--	'--	FALSE	'--	'--	false	'--	'--	'--	Blood Derived Normal	10	'--	released	'--	'--	'--	Not Reported	'--	'--	'--
TCGA-THCA	905469d2-4c97-4293-a20c-1b1f0462a25d	TCGA-FY-A3R6	65414ba0-8800-4626-9488-10d79274cf32	TCGA-FY-A3R6-01A	'--	'--	'--	'--	'--	101	'--	'--	'--	'--	'--	'--	7.0	'--	FALSE	'--	'--	true	'--	912F801B-814F-4FA4-9216-F62E875AAA7F	'--	Primary Tumor	1	'--	released	'--	'--	'--	Not Reported	'--	'--	'--
TCGA-THCA	905469d2-4c97-4293-a20c-1b1f0462a25d	TCGA-FY-A3R6	5192dd50-1827-4954-913e-c3a761c29cae	TCGA-FY-A3R6-01Z	'--	'--	'--	'--	'--	'--	0	'--	'--	'--	'--	'--	'--	'--	TRUE	'--	'--	No	'--	'--	FFPE	Primary Tumor	1	'--	released	'--	'--	'--	Not Reported	'--	'--	'--
TCGA-THCA	c781b49e-d08f-49e6-b774-7cfe4100e92d	TCGA-FE-A235	58e2000a-e322-43bf-b0df-9c0757145f55	TCGA-FE-A235-10A	'--	'--	'--	'--	'--	3121	'--	'--	'--	'--	'--	'--	'--	'--	FALSE	'--	'--	false	'--	'--	'--	Blood Derived Normal	10	'--	released	'--	'--	'--	Not Reported	'--	'--	'--
TCGA-THCA	c781b49e-d08f-49e6-b774-7cfe4100e92d	TCGA-FE-A235	377a0cbf-6a82-43fa-bc95-dadeced8916d	TCGA-FE-A235-01A	'--	'--	'--	'--	'--	3109	'--	'--	'--	'--	'--	'--	110.0	'--	FALSE	'--	'--	true	'--	E8842900-CA70-4C4E-96CB-07E2040BBC72	'--	Primary Tumor	1	'--	released	'--	'--	'--	Not Reported	'--	'--	'--
TCGA-THCA	c781b49e-d08f-49e6-b774-7cfe4100e92d	TCGA-FE-A235	b713fdd2-283d-40c5-97d9-d3ab19d19988	TCGA-FE-A235-01Z	'--	'--	'--	'--	'--	'--	0	'--	'--	'--	'--	'--	'--	'--	TRUE	'--	'--	No	'--	'--	FFPE	Primary Tumor	1	'--	released	'--	'--	'--	Not Reported	'--	'--	'--
TCGA-THCA	9f31deb9-b9f4-439b-aea4-f87c71406c79	TCGA-DJ-A2PS	bd79f9ac-49bf-48e1-8f83-292f6f1e987b	TCGA-DJ-A2PS-10A	'--	'--	'--	'--	'--	207	'--	'--	'--	'--	'--	'--	'--	'--	FALSE	'--	'--	false	'--	'--	'--	Blood Derived Normal	10	'--	released	'--	'--	'--	Not Reported	'--	'--	'--
TCGA-THCA	9f31deb9-b9f4-439b-aea4-f87c71406c79	TCGA-DJ-A2PS	e2da6f3f-544f-42cd-88a7-9374e11f7f1f	TCGA-DJ-A2PS-01Z	'--	'--	'--	'--	'--	'--	0	'--	'--	'--	'--	'--	'--	'--	TRUE	'--	'--	No	'--	'--	FFPE	Primary Tumor	1	'--	released	'--	'--	'--	Not Reported	'--	'--	'--
TCGA-THCA	9f31deb9-b9f4-439b-aea4-f87c71406c79	TCGA-DJ-A2PS	750ee423-6f57-4c61-8e06-9188d0dc4f28	TCGA-DJ-A2PS-01A	'--	'--	'--	'--	'--	207	'--	'--	'--	'--	'--	'--	140.0	'--	FALSE	'--	'--	true	'--	B1F7E6CD-E09F-4E83-AA24-778687FDA264	'--	Primary Tumor	1	'--	released	'--	'--	'--	Not Reported	'--	'--	'--
TCGA-THCA	69f621c8-de77-48c7-8939-4c887da9e6d8	TCGA-DJ-A3UN	0292bdfc-58b7-40a5-8787-a753885439d2	TCGA-DJ-A3UN-01Z	'--	'--	'--	'--	'--	'--	0	'--	'--	'--	'--	'--	'--	'--	TRUE	'--	'--	No	'--	'--	FFPE	Primary Tumor	1	'--	released	'--	'--	'--	Not Reported	'--	'--	'--
TCGA-THCA	69f621c8-de77-48c7-8939-4c887da9e6d8	TCGA-DJ-A3UN	d5a22241-abb0-47e4-a651-7404fbd2c110	TCGA-DJ-A3UN-01A	'--	'--	'--	'--	'--	282	'--	'--	'--	'--	'--	'--	100.0	'--	FALSE	'--	'--	true	'--	F69B781C-1912-4E31-8303-EAB84A84F9AE	'--	Primary Tumor	1	'--	released	'--	'--	'--	Not Reported	'--	'--	'--
TCGA-THCA	69f621c8-de77-48c7-8939-4c887da9e6d8	TCGA-DJ-A3UN	9bb90418-2318-4fce-a440-3ba56245bb5f	TCGA-DJ-A3UN-10A	'--	'--	'--	'--	'--	282	'--	'--	'--	'--	'--	'--	'--	'--	FALSE	'--	'--	false	'--	'--	'--	Blood Derived Normal	10	'--	released	'--	'--	'--	Not Reported	'--	'--	'--
TCGA-THCA	05350770-2b5b-4c58-84ce-0917665ccb90	TCGA-DJ-A2PP	0de80b35-d75a-456a-94dd-bb3e57b06429	TCGA-DJ-A2PP-10A	'--	'--	'--	'--	'--	148	'--	'--	'--	'--	'--	'--	'--	'--	FALSE	'--	'--	false	'--	'--	'--	Blood Derived Normal	10	'--	released	'--	'--	'--	Not Reported	'--	'--	'--
TCGA-THCA	05350770-2b5b-4c58-84ce-0917665ccb90	TCGA-DJ-A2PP	f6de8d5d-fdef-4b72-9c0f-184fd79ff3e5	TCGA-DJ-A2PP-01A	'--	'--	'--	'--	'--	148	'--	'--	'--	'--	'--	'--	460.0	'--	FALSE	'--	'--	true	'--	EE368CF1-9955-49B2-9EBA-3F6E37EE8D46	'--	Primary Tumor	1	'--	released	'--	'--	'--	Not Reported	'--	'--	'--
TCGA-THCA	05350770-2b5b-4c58-84ce-0917665ccb90	TCGA-DJ-A2PP	45bbe941-e6b3-4b9d-934c-f6d93b93447e	TCGA-DJ-A2PP-01Z	'--	'--	'--	'--	'--	'--	0	'--	'--	'--	'--	'--	'--	'--	TRUE	'--	'--	No	'--	'--	FFPE	Primary Tumor	1	'--	released	'--	'--	'--	Not Reported	'--	'--	'--
TCGA-THCA	778a8f53-53f6-4a03-8ce1-b0928539a444	TCGA-BJ-A45H	d4a091ef-3ec4-48b7-82fb-1a889f534807	TCGA-BJ-A45H-10A	'--	'--	'--	'--	'--	160	'--	'--	'--	'--	'--	'--	'--	'--	FALSE	'--	'--	false	'--	'--	'--	Blood Derived Normal	10	'--	released	'--	'--	'--	Not Reported	'--	'--	'--
TCGA-THCA	778a8f53-53f6-4a03-8ce1-b0928539a444	TCGA-BJ-A45H	894914e7-7027-482a-8002-307f6adfdc06	TCGA-BJ-A45H-01A	'--	'--	'--	'--	'--	160	'--	'--	'--	'--	'--	'--	160.0	'--	FALSE	'--	'--	true	'--	5D8E581C-D899-4D0C-A178-32AAD520D80F	'--	Primary Tumor	1	'--	released	'--	'--	'--	Not Reported	'--	'--	'--
TCGA-THCA	778a8f53-53f6-4a03-8ce1-b0928539a444	TCGA-BJ-A45H	340a9344-730d-489a-8fb8-69422c2cfbc3	TCGA-BJ-A45H-01Z	'--	'--	'--	'--	'--	'--	0	'--	'--	'--	'--	'--	'--	'--	TRUE	'--	'--	No	'--	'--	FFPE	Primary Tumor	1	'--	released	'--	'--	'--	Not Reported	'--	'--	'--
TCGA-THCA	754866ea-d5ca-451a-98e4-6e0c430d3652	TCGA-KS-A41I	214dec5a-0307-4d25-953c-d4e2317840f4	TCGA-KS-A41I-11A	'--	'--	'--	'--	'--	3832	'--	'--	'--	'--	'--	'--	110.0	'--	FALSE	'--	'--	false	'--	'--	'--	Solid Tissue Normal	11	'--	released	'--	'--	'--	Not Reported	'--	'--	'--
TCGA-THCA	754866ea-d5ca-451a-98e4-6e0c430d3652	TCGA-KS-A41I	b9d3b3ab-2980-4904-bf78-6aa3c96ddd8f	TCGA-KS-A41I-01A	'--	'--	'--	'--	'--	3832	'--	'--	'--	'--	'--	'--	60.0	'--	FALSE	'--	'--	false	'--	8D7FB9FA-F66C-431F-985F-90F811FBB487	'--	Primary Tumor	1	'--	released	'--	'--	'--	Not Reported	'--	'--	'--
TCGA-THCA	754866ea-d5ca-451a-98e4-6e0c430d3652	TCGA-KS-A41I	579dc7a2-4c47-4942-ba25-3884efd9f268	TCGA-KS-A41I-01Z	'--	'--	'--	'--	'--	'--	0	'--	'--	'--	'--	'--	'--	'--	TRUE	'--	'--	No	'--	'--	FFPE	Primary Tumor	1	'--	released	'--	'--	'--	Not Reported	'--	'--	'--
TCGA-THCA	0b170ed4-d919-466b-b765-47878b865aed	TCGA-DJ-A13T	abfec4e3-79d8-4263-b6f7-f98fdfeb1877	TCGA-DJ-A13T-10A	'--	'--	'--	'--	'--	641	'--	'--	'--	'--	'--	'--	'--	'--	FALSE	'--	'--	false	'--	'--	'--	Blood Derived Normal	10	'--	released	'--	'--	'--	Not Reported	'--	'--	'--
TCGA-THCA	0b170ed4-d919-466b-b765-47878b865aed	TCGA-DJ-A13T	f9abe607-cf27-4b6d-ba4f-252467fa5a7f	TCGA-DJ-A13T-01Z	'--	'--	'--	'--	'--	'--	0	'--	'--	'--	'--	'--	'--	'--	TRUE	'--	'--	No	'--	'--	FFPE	Primary Tumor	1	'--	released	'--	'--	'--	Not Reported	'--	'--	'--
TCGA-THCA	0b170ed4-d919-466b-b765-47878b865aed	TCGA-DJ-A13T	6883ba87-9184-40d7-840b-603b15d73f7a	TCGA-DJ-A13T-01A	'--	'--	'--	'--	'--	641	'--	'--	'--	'--	'--	'--	170.0	'--	FALSE	'--	'--	true	'--	F5E0C7C9-0A8A-464A-A33F-00CA59772698	'--	Primary Tumor	1	'--	released	'--	'--	'--	Not Reported	'--	'--	'--
TCGA-THCA	4f340c8c-5912-4257-b57d-c096da254c26	TCGA-EL-A4JW	fbb4d80c-54a7-4058-af43-a6e4ba10ef16	TCGA-EL-A4JW-01Z	'--	'--	'--	'--	'--	'--	0	'--	'--	'--	'--	'--	'--	'--	TRUE	'--	'--	No	'--	'--	FFPE	Primary Tumor	1	'--	released	'--	'--	'--	Not Reported	'--	'--	'--
TCGA-THCA	4f340c8c-5912-4257-b57d-c096da254c26	TCGA-EL-A4JW	5fce47e0-5daf-4bef-8504-43baa545e470	TCGA-EL-A4JW-11A	'--	'--	'--	'--	'--	1295	'--	'--	'--	'--	'--	'--	200.0	'--	FALSE	'--	'--	false	'--	'--	'--	Solid Tissue Normal	11	'--	released	'--	'--	'--	Not Reported	'--	'--	'--
TCGA-THCA	4f340c8c-5912-4257-b57d-c096da254c26	TCGA-EL-A4JW	67be946e-8260-40c3-b763-0b43b49c086d	TCGA-EL-A4JW-01A	'--	'--	'--	'--	'--	1295	'--	'--	'--	'--	'--	'--	300.0	'--	FALSE	'--	'--	false	'--	63B98E77-2C2B-4767-9D06-D5C6BC5011D7	'--	Primary Tumor	1	'--	released	'--	'--	'--	Not Reported	'--	'--	'--
TCGA-THCA	e7cf1cca-384e-4a00-bb30-bed154ec15c0	TCGA-BJ-A45D	a8250761-da38-4337-a276-056347c96ed2	TCGA-BJ-A45D-01A	'--	'--	'--	'--	'--	100	'--	'--	'--	'--	'--	'--	200.0	'--	FALSE	'--	'--	true	'--	DAF53874-AAD5-46B1-AFA0-8F3F917241EF	'--	Primary Tumor	1	'--	released	'--	'--	'--	Not Reported	'--	'--	'--
TCGA-THCA	e7cf1cca-384e-4a00-bb30-bed154ec15c0	TCGA-BJ-A45D	e09ebba1-3e05-49c8-8562-9e50c303824f	TCGA-BJ-A45D-10A	'--	'--	'--	'--	'--	100	'--	'--	'--	'--	'--	'--	'--	'--	FALSE	'--	'--	false	'--	'--	'--	Blood Derived Normal	10	'--	released	'--	'--	'--	Not Reported	'--	'--	'--
TCGA-THCA	e7cf1cca-384e-4a00-bb30-bed154ec15c0	TCGA-BJ-A45D	4599ccc5-d957-47d0-8bc3-f55ffee6ea65	TCGA-BJ-A45D-01Z	'--	'--	'--	'--	'--	'--	0	'--	'--	'--	'--	'--	'--	'--	TRUE	'--	'--	No	'--	'--	FFPE	Primary Tumor	1	'--	released	'--	'--	'--	Not Reported	'--	'--	'--
TCGA-THCA	e7cf1cca-384e-4a00-bb30-bed154ec15c0	TCGA-BJ-A45D	219f9d5d-93e9-434b-9548-3e2399caeee1	TCGA-BJ-A45D-11A	'--	'--	'--	'--	'--	100	'--	'--	'--	'--	'--	'--	160.0	'--	FALSE	'--	'--	true	'--	'--	'--	Solid Tissue Normal	11	'--	released	'--	'--	'--	Not Reported	'--	'--	'--
TCGA-THCA	2f59f12d-ca0c-4ac6-9718-98a6d455af46	TCGA-EM-A2CP	043765f1-ffbd-4ac9-b0ae-733c3643083d	TCGA-EM-A2CP-01A	'--	'--	'--	'--	'--	134	'--	'--	'--	'--	'--	'--	110.0	'--	FALSE	'--	'--	false	'--	3117EB53-8EAB-40EE-A93C-12EBDC0B45D8	'--	Primary Tumor	1	'--	released	'--	'--	'--	Not Reported	'--	'--	'--
TCGA-THCA	2f59f12d-ca0c-4ac6-9718-98a6d455af46	TCGA-EM-A2CP	91c50769-8430-4fc1-9974-7058d4db15d5	TCGA-EM-A2CP-01Z	'--	'--	'--	'--	'--	'--	0	'--	'--	'--	'--	'--	'--	'--	TRUE	'--	'--	No	'--	'--	FFPE	Primary Tumor	1	'--	released	'--	'--	'--	Not Reported	'--	'--	'--
TCGA-THCA	2f59f12d-ca0c-4ac6-9718-98a6d455af46	TCGA-EM-A2CP	16933321-36c6-43b3-a0c9-511646391466	TCGA-EM-A2CP-10A	'--	'--	'--	'--	'--	224	'--	'--	'--	'--	'--	'--	'--	'--	FALSE	'--	'--	false	'--	'--	'--	Blood Derived Normal	10	'--	released	'--	'--	'--	Not Reported	'--	'--	'--
TCGA-THCA	8cfc2589-b0ad-4fe6-8420-8f6fe0178bcc	TCGA-EM-A3OB	f0f1f5c2-35e9-4f9c-922d-35d4b3828bcd	TCGA-EM-A3OB-10A	'--	'--	'--	'--	'--	148	'--	'--	'--	'--	'--	'--	'--	'--	FALSE	'--	'--	false	'--	'--	'--	Blood Derived Normal	10	'--	released	'--	'--	'--	Not Reported	'--	'--	'--
TCGA-THCA	8cfc2589-b0ad-4fe6-8420-8f6fe0178bcc	TCGA-EM-A3OB	8133fcfe-ecc4-4503-b81e-00fdf6f87426	TCGA-EM-A3OB-01A	'--	'--	'--	'--	'--	79	'--	'--	'--	'--	'--	'--	80.0	'--	FALSE	'--	'--	false	'--	E32ED26A-731B-4D14-A5CB-6C87A5D876DA	'--	Primary Tumor	1	'--	released	'--	'--	'--	Not Reported	'--	'--	'--
TCGA-THCA	8cfc2589-b0ad-4fe6-8420-8f6fe0178bcc	TCGA-EM-A3OB	ca8a1329-23d1-47ce-a77d-e907818cf60f	TCGA-EM-A3OB-01Z	'--	'--	'--	'--	'--	'--	0	'--	'--	'--	'--	'--	'--	'--	TRUE	'--	'--	No	'--	'--	FFPE	Primary Tumor	1	'--	released	'--	'--	'--	Not Reported	'--	'--	'--
TCGA-THCA	524a39ee-8fa3-418e-98a2-a6a90e9c8064	TCGA-BJ-A28R	f4906b86-3971-4ed3-ac3c-69635311fb45	TCGA-BJ-A28R-01A	'--	'--	'--	'--	'--	205	'--	'--	'--	'--	'--	'--	190.0	'--	FALSE	'--	'--	true	'--	163FA0B6-9488-47D1-AAB6-F4FD5F8ACFFD	'--	Primary Tumor	1	'--	released	'--	'--	'--	Not Reported	'--	'--	'--
TCGA-THCA	524a39ee-8fa3-418e-98a2-a6a90e9c8064	TCGA-BJ-A28R	46a250f7-e91f-4f8b-80b1-2f091efc1351	TCGA-BJ-A28R-01Z	'--	'--	'--	'--	'--	'--	0	'--	'--	'--	'--	'--	'--	'--	TRUE	'--	'--	No	'--	'--	FFPE	Primary Tumor	1	'--	released	'--	'--	'--	Not Reported	'--	'--	'--
TCGA-THCA	524a39ee-8fa3-418e-98a2-a6a90e9c8064	TCGA-BJ-A28R	3f0615a1-ed60-4cbb-9f9c-5f2c18ef7df9	TCGA-BJ-A28R-11A	'--	'--	'--	'--	'--	205	'--	'--	'--	'--	'--	'--	120.0	'--	FALSE	'--	'--	true	'--	'--	'--	Solid Tissue Normal	11	'--	released	'--	'--	'--	Not Reported	'--	'--	'--
TCGA-THCA	524a39ee-8fa3-418e-98a2-a6a90e9c8064	TCGA-BJ-A28R	576d5b97-6871-4e32-8a11-14ecae9d490c	TCGA-BJ-A28R-10A	'--	'--	'--	'--	'--	205	'--	'--	'--	'--	'--	'--	'--	'--	FALSE	'--	'--	false	'--	'--	'--	Blood Derived Normal	10	'--	released	'--	'--	'--	Not Reported	'--	'--	'--
TCGA-THCA	c31b3adf-3fc6-4a72-83b0-bbc0f295b5e7	TCGA-DE-A0Y3	3ae03b86-1473-409c-8118-a91a73a36f60	TCGA-DE-A0Y3-01B	'--	'--	'--	'--	'--	885	'--	'--	'--	'--	'--	'--	20.0	'--	FALSE	'--	'--	false	'--	1D87503D-1F7D-4545-B579-EF9426B02B5A	'--	Primary Tumor	1	'--	released	'--	'--	'--	Not Reported	'--	'--	'--
TCGA-THCA	c31b3adf-3fc6-4a72-83b0-bbc0f295b5e7	TCGA-DE-A0Y3	2b40de55-0cbb-44d8-a26f-b48448b32354	TCGA-DE-A0Y3-10A	'--	'--	'--	'--	'--	885	'--	'--	'--	'--	'--	'--	'--	'--	FALSE	'--	'--	false	'--	'--	'--	Blood Derived Normal	10	'--	released	'--	'--	'--	Not Reported	'--	'--	'--
TCGA-THCA	c31b3adf-3fc6-4a72-83b0-bbc0f295b5e7	TCGA-DE-A0Y3	6d82fc6d-cdb6-443a-86e3-13d332cd3136	TCGA-DE-A0Y3-01Z	'--	'--	'--	'--	'--	'--	0	'--	'--	'--	'--	'--	'--	'--	TRUE	'--	'--	No	'--	'--	FFPE	Primary Tumor	1	'--	released	'--	'--	'--	Not Reported	'--	'--	'--
TCGA-THCA	7d11b016-c564-4fb5-9b85-1b1a0188006f	TCGA-FE-A237	fe462b39-830a-4bdb-acb6-5fa0fde0fbc2	TCGA-FE-A237-01A	'--	'--	'--	'--	'--	2173	'--	'--	'--	'--	'--	'--	100.0	'--	FALSE	'--	'--	true	'--	C66683CA-DB7D-4451-AC28-E91FD6FA651E	'--	Primary Tumor	1	'--	released	'--	'--	'--	Not Reported	'--	'--	'--
TCGA-THCA	7d11b016-c564-4fb5-9b85-1b1a0188006f	TCGA-FE-A237	509ab990-2d4b-44cf-89e6-6537be1aaca8	TCGA-FE-A237-10A	'--	'--	'--	'--	'--	2185	'--	'--	'--	'--	'--	'--	'--	'--	FALSE	'--	'--	false	'--	'--	'--	Blood Derived Normal	10	'--	released	'--	'--	'--	Not Reported	'--	'--	'--
TCGA-THCA	7d11b016-c564-4fb5-9b85-1b1a0188006f	TCGA-FE-A237	73fdc8a7-44e0-4e45-9f8e-57eed87e5506	TCGA-FE-A237-01Z	'--	'--	'--	'--	'--	'--	0	'--	'--	'--	'--	'--	'--	'--	TRUE	'--	'--	No	'--	'--	FFPE	Primary Tumor	1	'--	released	'--	'--	'--	Not Reported	'--	'--	'--
TCGA-THCA	5cdaa0c8-27b8-4552-9dcd-20d67b1eb70f	TCGA-ET-A3DS	53233f47-c7d1-48c8-80e6-91e28ee1d974	TCGA-ET-A3DS-01A	'--	'--	'--	'--	'--	784	'--	'--	'--	'--	'--	'--	130.0	'--	FALSE	'--	'--	true	'--	7EFF2F11-7160-4259-904F-44D39C1C0243	'--	Primary Tumor	1	'--	released	'--	'--	'--	Not Reported	'--	'--	'--
TCGA-THCA	5cdaa0c8-27b8-4552-9dcd-20d67b1eb70f	TCGA-ET-A3DS	d485bc84-43be-45a9-ae24-092127df5cc8	TCGA-ET-A3DS-10A	'--	'--	'--	'--	'--	784	'--	'--	'--	'--	'--	'--	'--	'--	FALSE	'--	'--	false	'--	'--	'--	Blood Derived Normal	10	'--	released	'--	'--	'--	Not Reported	'--	'--	'--
TCGA-THCA	5cdaa0c8-27b8-4552-9dcd-20d67b1eb70f	TCGA-ET-A3DS	0b0e8a51-fc68-4342-87f7-320d0ccc4a59	TCGA-ET-A3DS-01Z	'--	'--	'--	'--	'--	'--	0	'--	'--	'--	'--	'--	'--	'--	TRUE	'--	'--	No	'--	'--	FFPE	Primary Tumor	1	'--	released	'--	'--	'--	Not Reported	'--	'--	'--
TCGA-THCA	011ae7b8-5003-4fcd-9f20-906a723f2c66	TCGA-EL-A3CW	590c3292-1ddd-4204-b6b7-956c5467d1e3	TCGA-EL-A3CW-01A	'--	'--	'--	'--	'--	4171	'--	'--	'--	'--	'--	'--	200.0	'--	FALSE	'--	'--	true	'--	18FB3CB9-99FA-4EF9-ABD2-9A8A57C6CC4D	'--	Primary Tumor	1	'--	released	'--	'--	'--	Not Reported	'--	'--	'--
TCGA-THCA	011ae7b8-5003-4fcd-9f20-906a723f2c66	TCGA-EL-A3CW	716679ce-ef70-4c93-8d37-3fcb469db26e	TCGA-EL-A3CW-10A	'--	'--	'--	'--	'--	4171	'--	'--	'--	'--	'--	'--	'--	'--	FALSE	'--	'--	false	'--	'--	'--	Blood Derived Normal	10	'--	released	'--	'--	'--	Not Reported	'--	'--	'--
TCGA-THCA	011ae7b8-5003-4fcd-9f20-906a723f2c66	TCGA-EL-A3CW	c1ce9fc2-620d-4f7a-993f-59afc6f874b4	TCGA-EL-A3CW-01Z	'--	'--	'--	'--	'--	'--	0	'--	'--	'--	'--	'--	'--	'--	TRUE	'--	'--	No	'--	'--	FFPE	Primary Tumor	1	'--	released	'--	'--	'--	Not Reported	'--	'--	'--
TCGA-THCA	dfe086e6-71a5-4131-9602-f20977bf7454	TCGA-ET-A39S	902adb27-13ef-4c87-845c-9a79944a1644	TCGA-ET-A39S-01A	'--	'--	'--	'--	'--	1507	'--	'--	'--	'--	'--	'--	50.0	'--	FALSE	'--	'--	true	'--	2E9B4821-BC11-4BE9-9420-01B5C16B3270	'--	Primary Tumor	1	'--	released	'--	'--	'--	Not Reported	'--	'--	'--
TCGA-THCA	dfe086e6-71a5-4131-9602-f20977bf7454	TCGA-ET-A39S	b5172350-98a8-4084-b683-5cc954b41333	TCGA-ET-A39S-01Z	'--	'--	'--	'--	'--	'--	0	'--	'--	'--	'--	'--	'--	'--	TRUE	'--	'--	No	'--	'--	FFPE	Primary Tumor	1	'--	released	'--	'--	'--	Not Reported	'--	'--	'--
TCGA-THCA	dfe086e6-71a5-4131-9602-f20977bf7454	TCGA-ET-A39S	c981aba9-9ce5-4277-a7b6-a266911ad81d	TCGA-ET-A39S-10A	'--	'--	'--	'--	'--	1507	'--	'--	'--	'--	'--	'--	'--	'--	FALSE	'--	'--	false	'--	'--	'--	Blood Derived Normal	10	'--	released	'--	'--	'--	Not Reported	'--	'--	'--
TCGA-THCA	286c69b0-75ba-48d6-a26b-26077f101bbb	TCGA-EL-A3ZG	1371f6b5-58c3-45dc-895b-f831ebe2f3dc	TCGA-EL-A3ZG-01Z	'--	'--	'--	'--	'--	'--	0	'--	'--	'--	'--	'--	'--	'--	TRUE	'--	'--	No	'--	'--	FFPE	Primary Tumor	1	'--	released	'--	'--	'--	Not Reported	'--	'--	'--
TCGA-THCA	286c69b0-75ba-48d6-a26b-26077f101bbb	TCGA-EL-A3ZG	decef015-1b00-4025-82d5-131674b1ce2a	TCGA-EL-A3ZG-01A	'--	'--	'--	'--	'--	2291	'--	'--	'--	'--	'--	'--	280.0	'--	FALSE	'--	'--	false	'--	347CFFC5-0A24-486B-8254-62D8E8F77643	'--	Primary Tumor	1	'--	released	'--	'--	'--	Not Reported	'--	'--	'--
TCGA-THCA	286c69b0-75ba-48d6-a26b-26077f101bbb	TCGA-EL-A3ZG	090cfe66-e1a0-4444-b7bd-ce1c8b9b65af	TCGA-EL-A3ZG-11A	'--	'--	'--	'--	'--	2291	'--	'--	'--	'--	'--	'--	220.0	'--	FALSE	'--	'--	false	'--	'--	'--	Solid Tissue Normal	11	'--	released	'--	'--	'--	Not Reported	'--	'--	'--
TCGA-THCA	6ee95dc8-2bac-4691-afa2-8222e07506ad	TCGA-DJ-A3US	52bea6ee-17b9-4127-b782-56e10fcf0181	TCGA-DJ-A3US-01Z	'--	'--	'--	'--	'--	'--	0	'--	'--	'--	'--	'--	'--	'--	TRUE	'--	'--	No	'--	'--	FFPE	Primary Tumor	1	'--	released	'--	'--	'--	Not Reported	'--	'--	'--
TCGA-THCA	6ee95dc8-2bac-4691-afa2-8222e07506ad	TCGA-DJ-A3US	9f63c13d-6008-416e-9e6b-d4ed4210e569	TCGA-DJ-A3US-01A	'--	'--	'--	'--	'--	524	'--	'--	'--	'--	'--	'--	240.0	'--	FALSE	'--	'--	true	'--	9994E892-85D5-4754-963E-16F0F3AEC2C2	'--	Primary Tumor	1	'--	released	'--	'--	'--	Not Reported	'--	'--	'--
TCGA-THCA	6ee95dc8-2bac-4691-afa2-8222e07506ad	TCGA-DJ-A3US	d03234d9-e9fc-4b55-b516-00985999a1b3	TCGA-DJ-A3US-10A	'--	'--	'--	'--	'--	524	'--	'--	'--	'--	'--	'--	'--	'--	FALSE	'--	'--	false	'--	'--	'--	Blood Derived Normal	10	'--	released	'--	'--	'--	Not Reported	'--	'--	'--
TCGA-THCA	ebccfb5f-c0a8-4263-aaff-b5dd83585191	TCGA-ET-A25N	57db2f77-c805-4328-8b19-a1bf2c996c1d	TCGA-ET-A25N-11A	'--	'--	'--	'--	'--	521	'--	'--	'--	'--	'--	'--	'--	'--	FALSE	'--	'--	false	'--	'--	'--	Solid Tissue Normal	11	'--	released	'--	'--	'--	Not Reported	'--	'--	'--
TCGA-THCA	ebccfb5f-c0a8-4263-aaff-b5dd83585191	TCGA-ET-A25N	0cd93b1f-1cbb-4c1e-a4f6-940f95c41683	TCGA-ET-A25N-01A	'--	'--	'--	'--	'--	521	'--	'--	'--	'--	'--	'--	60.0	'--	FALSE	'--	'--	true	'--	D79E273F-D349-4F6B-93EB-688A3D4EE983	'--	Primary Tumor	1	'--	released	'--	'--	'--	Not Reported	'--	'--	'--
TCGA-THCA	ebccfb5f-c0a8-4263-aaff-b5dd83585191	TCGA-ET-A25N	bee565e6-0f70-4b20-9acc-06828db12fe0	TCGA-ET-A25N-01Z	'--	'--	'--	'--	'--	'--	0	'--	'--	'--	'--	'--	'--	'--	TRUE	'--	'--	No	'--	'--	FFPE	Primary Tumor	1	'--	released	'--	'--	'--	Not Reported	'--	'--	'--
TCGA-THCA	af546062-0960-41f0-9ed1-6acecbad99f3	TCGA-DJ-A2Q6	98b62b5a-8f7c-4855-83ee-57859d1719c0	TCGA-DJ-A2Q6-01Z	'--	'--	'--	'--	'--	'--	0	'--	'--	'--	'--	'--	'--	'--	TRUE	'--	'--	No	'--	'--	FFPE	Primary Tumor	1	'--	released	'--	'--	'--	Not Reported	'--	'--	'--
TCGA-THCA	af546062-0960-41f0-9ed1-6acecbad99f3	TCGA-DJ-A2Q6	74b9c0c8-ef36-4194-ab8c-d81d61a39705	TCGA-DJ-A2Q6-01A	'--	'--	'--	'--	'--	138	'--	'--	'--	'--	'--	'--	90.0	'--	FALSE	'--	'--	true	'--	CCF825BD-7410-4ED2-B0E2-8B17BB5C5BBD	'--	Primary Tumor	1	'--	released	'--	'--	'--	Not Reported	'--	'--	'--
TCGA-THCA	af546062-0960-41f0-9ed1-6acecbad99f3	TCGA-DJ-A2Q6	7906d3be-caa6-4cf7-bdb7-7743443ab865	TCGA-DJ-A2Q6-10A	'--	'--	'--	'--	'--	138	'--	'--	'--	'--	'--	'--	'--	'--	FALSE	'--	'--	false	'--	'--	'--	Blood Derived Normal	10	'--	released	'--	'--	'--	Not Reported	'--	'--	'--
TCGA-THCA	567e4d90-5c5a-44f0-a462-90c831f3c096	TCGA-EM-A1YA	b823cfe2-8fc2-411e-beed-92165341ac2f	TCGA-EM-A1YA-10A	'--	'--	'--	'--	'--	290	'--	'--	'--	'--	'--	'--	'--	'--	FALSE	'--	'--	false	'--	'--	'--	Blood Derived Normal	10	'--	released	'--	'--	'--	Not Reported	'--	'--	'--
TCGA-THCA	567e4d90-5c5a-44f0-a462-90c831f3c096	TCGA-EM-A1YA	02d56867-e549-479a-95d8-8a4946256c5e	TCGA-EM-A1YA-01Z	'--	'--	'--	'--	'--	'--	0	'--	'--	'--	'--	'--	'--	'--	TRUE	'--	'--	No	'--	'--	FFPE	Primary Tumor	1	'--	released	'--	'--	'--	Not Reported	'--	'--	'--
TCGA-THCA	567e4d90-5c5a-44f0-a462-90c831f3c096	TCGA-EM-A1YA	d0880877-36cf-4ded-87b2-898c3446f90d	TCGA-EM-A1YA-01A	'--	'--	'--	'--	'--	290	'--	'--	'--	'--	'--	'--	120.0	'--	FALSE	'--	'--	false	'--	2156B952-C5C8-40EF-BEE9-41C9B43D8A74	'--	Primary Tumor	1	'--	released	'--	'--	'--	Not Reported	'--	'--	'--
TCGA-THCA	7a45cbc2-9fbe-49f9-9d70-f8dc82829769	TCGA-ET-A39T	3a8f4b4f-241a-43fd-bb83-b8f147800a5c	TCGA-ET-A39T-01A	'--	'--	'--	'--	'--	1721	'--	'--	'--	'--	'--	'--	430.0	'--	FALSE	'--	'--	true	'--	CDD7A4EF-9901-4085-B897-975AE5E165D8	'--	Primary Tumor	1	'--	released	'--	'--	'--	Not Reported	'--	'--	'--
TCGA-THCA	7a45cbc2-9fbe-49f9-9d70-f8dc82829769	TCGA-ET-A39T	8310bf42-1e3f-4c9b-8fc9-0991d039e24a	TCGA-ET-A39T-10A	'--	'--	'--	'--	'--	1721	'--	'--	'--	'--	'--	'--	'--	'--	FALSE	'--	'--	false	'--	'--	'--	Blood Derived Normal	10	'--	released	'--	'--	'--	Not Reported	'--	'--	'--
TCGA-THCA	7a45cbc2-9fbe-49f9-9d70-f8dc82829769	TCGA-ET-A39T	d7a7f3f1-c828-4b17-a086-7371a57b85f1	TCGA-ET-A39T-01Z	'--	'--	'--	'--	'--	'--	0	'--	'--	'--	'--	'--	'--	'--	TRUE	'--	'--	No	'--	'--	FFPE	Primary Tumor	1	'--	released	'--	'--	'--	Not Reported	'--	'--	'--
TCGA-THCA	812a2d18-c43b-4484-8a8d-234056a0e90b	TCGA-FY-A76V	676f1fbc-0eb7-4f4a-b094-85097f0f64ff	TCGA-FY-A76V-10A	'--	'--	'--	'--	'--	136	'--	'--	'--	'--	'--	'--	'--	'--	FALSE	'--	'--	false	'--	'--	'--	Blood Derived Normal	10	'--	released	'--	'--	'--	Not Reported	'--	'--	'--
TCGA-THCA	812a2d18-c43b-4484-8a8d-234056a0e90b	TCGA-FY-A76V	567db7d7-cbd2-4643-9644-9e2a38eded7a	TCGA-FY-A76V-01A	'--	'--	'--	'--	'--	136	'--	'--	'--	'--	'--	'--	30.0	'--	FALSE	'--	'--	true	'--	9D4073DB-2494-4472-A3FD-190658622F05	'--	Primary Tumor	1	'--	released	'--	'--	'--	Not Reported	'--	'--	'--
TCGA-THCA	812a2d18-c43b-4484-8a8d-234056a0e90b	TCGA-FY-A76V	67fd8bf2-df80-4c48-a634-60b826b761dc	TCGA-FY-A76V-01Z	'--	'--	'--	'--	'--	'--	0	'--	'--	'--	'--	'--	'--	'--	TRUE	'--	'--	No	'--	'--	FFPE	Primary Tumor	1	'--	released	'--	'--	'--	Not Reported	'--	'--	'--
TCGA-THCA	29afb71c-c2ca-499e-b1c7-12758c9b03d6	TCGA-EL-A4K4	e53da68a-a5c6-451c-9168-33f37f3755eb	TCGA-EL-A4K4-01Z	'--	'--	'--	'--	'--	'--	0	'--	'--	'--	'--	'--	'--	'--	TRUE	'--	'--	No	'--	'--	FFPE	Primary Tumor	1	'--	released	'--	'--	'--	Not Reported	'--	'--	'--
TCGA-THCA	29afb71c-c2ca-499e-b1c7-12758c9b03d6	TCGA-EL-A4K4	81270a59-8d25-4b67-bd92-5a0616fe9ab2	TCGA-EL-A4K4-01A	'--	'--	'--	'--	'--	899	'--	'--	'--	'--	'--	'--	230.0	'--	FALSE	'--	'--	false	'--	19218996-6E11-4D0F-A09A-FCE3119185F6	'--	Primary Tumor	1	'--	released	'--	'--	'--	Not Reported	'--	'--	'--
TCGA-THCA	29afb71c-c2ca-499e-b1c7-12758c9b03d6	TCGA-EL-A4K4	f216a196-cb8a-4ac5-83f9-5d305b56d272	TCGA-EL-A4K4-11A	'--	'--	'--	'--	'--	899	'--	'--	'--	'--	'--	'--	290.0	'--	FALSE	'--	'--	false	'--	'--	'--	Solid Tissue Normal	11	'--	released	'--	'--	'--	Not Reported	'--	'--	'--
TCGA-THCA	3bfa52af-cb40-45d8-9bdc-591985aae7fb	TCGA-EL-A3ZO	0c13351c-ea7c-44b1-a9ee-ed7e383b7924	TCGA-EL-A3ZO-01A	'--	'--	'--	'--	'--	1492	'--	'--	'--	'--	'--	'--	230.0	'--	FALSE	'--	'--	false	'--	FF6B5F00-9DE1-4073-AC35-7B65378B73EB	'--	Primary Tumor	1	'--	released	'--	'--	'--	Not Reported	'--	'--	'--
TCGA-THCA	3bfa52af-cb40-45d8-9bdc-591985aae7fb	TCGA-EL-A3ZO	06bc9844-47d5-40f1-b19f-856b198cda93	TCGA-EL-A3ZO-01Z	'--	'--	'--	'--	'--	'--	0	'--	'--	'--	'--	'--	'--	'--	TRUE	'--	'--	No	'--	'--	FFPE	Primary Tumor	1	'--	released	'--	'--	'--	Not Reported	'--	'--	'--
TCGA-THCA	3bfa52af-cb40-45d8-9bdc-591985aae7fb	TCGA-EL-A3ZO	8a728a44-be51-43b1-bf8e-2344aa4069db	TCGA-EL-A3ZO-11A	'--	'--	'--	'--	'--	1492	'--	'--	'--	'--	'--	'--	240.0	'--	FALSE	'--	'--	false	'--	'--	'--	Solid Tissue Normal	11	'--	released	'--	'--	'--	Not Reported	'--	'--	'--
TCGA-THCA	12f90efb-c45b-4372-8197-2dfd9ca247ea	TCGA-EM-A4FM	c9a7a81f-a8c9-41f3-aee9-002945b55f0d	TCGA-EM-A4FM-01A	'--	'--	'--	'--	'--	241	'--	'--	'--	'--	'--	'--	80.0	'--	FALSE	'--	'--	false	'--	262BB6C6-7DFB-40E4-8C69-65F986CF74BB	'--	Primary Tumor	1	'--	released	'--	'--	'--	Not Reported	'--	'--	'--
TCGA-THCA	12f90efb-c45b-4372-8197-2dfd9ca247ea	TCGA-EM-A4FM	a6debc2f-58d8-4f79-90d9-95c7a60cfc7d	TCGA-EM-A4FM-10A	'--	'--	'--	'--	'--	241	'--	'--	'--	'--	'--	'--	'--	'--	FALSE	'--	'--	false	'--	'--	'--	Blood Derived Normal	10	'--	released	'--	'--	'--	Not Reported	'--	'--	'--
TCGA-THCA	12f90efb-c45b-4372-8197-2dfd9ca247ea	TCGA-EM-A4FM	11a7aa15-1fb3-413d-aa2c-5ef4dc2cbb48	TCGA-EM-A4FM-01Z	'--	'--	'--	'--	'--	'--	0	'--	'--	'--	'--	'--	'--	'--	TRUE	'--	'--	No	'--	'--	FFPE	Primary Tumor	1	'--	released	'--	'--	'--	Not Reported	'--	'--	'--
TCGA-THCA	23ad7900-4e99-4abf-82ff-71edeaa8a51c	TCGA-KS-A41J	5c837324-73a6-402f-9f67-cb8d13afbb9d	TCGA-KS-A41J-11A	'--	'--	'--	'--	'--	4417	'--	'--	'--	'--	'--	'--	90.0	'--	FALSE	'--	'--	false	'--	'--	'--	Solid Tissue Normal	11	'--	released	'--	'--	'--	Not Reported	'--	'--	'--
TCGA-THCA	23ad7900-4e99-4abf-82ff-71edeaa8a51c	TCGA-KS-A41J	2803f075-84c3-4b62-8761-4de035a9b0d5	TCGA-KS-A41J-01A	'--	'--	'--	'--	'--	4417	'--	'--	'--	'--	'--	'--	80.0	'--	FALSE	'--	'--	false	'--	85C21DA8-13C6-4E22-939C-579C38A14891	'--	Primary Tumor	1	'--	released	'--	'--	'--	Not Reported	'--	'--	'--
TCGA-THCA	23ad7900-4e99-4abf-82ff-71edeaa8a51c	TCGA-KS-A41J	a9894f89-33f8-472f-971d-ee7bd23c74cb	TCGA-KS-A41J-01Z	'--	'--	'--	'--	'--	'--	0	'--	'--	'--	'--	'--	'--	'--	TRUE	'--	'--	No	'--	'--	FFPE	Primary Tumor	1	'--	released	'--	'--	'--	Not Reported	'--	'--	'--
TCGA-THCA	efbdedaa-4b02-40ac-b93c-9670c018cf7f	TCGA-E3-A3E2	c6534be5-f333-4ad5-bec2-7c15c2683fad	TCGA-E3-A3E2-01A	'--	'--	'--	'--	'--	1704	'--	'--	'--	'--	'--	'--	30.0	'--	FALSE	'--	'--	false	'--	8449B3D4-33B2-4C33-8357-FA189B778624	'--	Primary Tumor	1	'--	released	'--	'--	'--	Not Reported	'--	'--	'--
TCGA-THCA	efbdedaa-4b02-40ac-b93c-9670c018cf7f	TCGA-E3-A3E2	c6e8cc36-7bea-4379-94cf-7a11b92190d8	TCGA-E3-A3E2-01Z	'--	'--	'--	'--	'--	'--	0	'--	'--	'--	'--	'--	'--	'--	TRUE	'--	'--	No	'--	'--	FFPE	Primary Tumor	1	'--	released	'--	'--	'--	Not Reported	'--	'--	'--
TCGA-THCA	efbdedaa-4b02-40ac-b93c-9670c018cf7f	TCGA-E3-A3E2	8d76b995-54a9-406c-aeae-9a92b1777427	TCGA-E3-A3E2-10A	'--	'--	'--	'--	'--	1760	'--	'--	'--	'--	'--	'--	'--	'--	FALSE	'--	'--	false	'--	'--	'--	Blood Derived Normal	10	'--	released	'--	'--	'--	Not Reported	'--	'--	'--
TCGA-THCA	b1640709-8b2f-4cca-a2c0-55a1b4a1884b	TCGA-EL-A3T7	03bb1867-9cb9-49ea-8504-707325545f19	TCGA-EL-A3T7-11A	'--	'--	'--	'--	'--	2718	'--	'--	'--	'--	'--	'--	230.0	'--	FALSE	'--	'--	true	'--	'--	'--	Solid Tissue Normal	11	'--	released	'--	'--	'--	Not Reported	'--	'--	'--
TCGA-THCA	b1640709-8b2f-4cca-a2c0-55a1b4a1884b	TCGA-EL-A3T7	42488fd5-8b53-4761-8d99-8a767fa411f0	TCGA-EL-A3T7-01Z	'--	'--	'--	'--	'--	'--	0	'--	'--	'--	'--	'--	'--	'--	TRUE	'--	'--	No	'--	'--	FFPE	Primary Tumor	1	'--	released	'--	'--	'--	Not Reported	'--	'--	'--
TCGA-THCA	b1640709-8b2f-4cca-a2c0-55a1b4a1884b	TCGA-EL-A3T7	76e3d9f4-513f-4a44-8918-4c29ce5fb305	TCGA-EL-A3T7-01A	'--	'--	'--	'--	'--	2718	'--	'--	'--	'--	'--	'--	200.0	'--	FALSE	'--	'--	true	'--	6B1080F8-AF82-4FE3-B91D-3CA2DBA4A37E	'--	Primary Tumor	1	'--	released	'--	'--	'--	Not Reported	'--	'--	'--
TCGA-THCA	2ae6a00c-bc6e-42fe-a0cb-40339d5fdc73	TCGA-J8-A4HY	7e900ef6-a7bd-40cd-b4eb-ab42fc788da5	TCGA-J8-A4HY-01A	'--	'--	'--	'--	'--	45	'--	'--	'--	'--	'--	'--	180.0	'--	FALSE	'--	'--	true	'--	44A2984E-9B5D-4A22-957D-359C2647589F	'--	Primary Tumor	1	'--	released	'--	'--	'--	Not Reported	'--	'--	'--
TCGA-THCA	2ae6a00c-bc6e-42fe-a0cb-40339d5fdc73	TCGA-J8-A4HY	9a9ecd8f-1158-499b-91a7-23393ed09cc5	TCGA-J8-A4HY-10A	'--	'--	'--	'--	'--	45	'--	'--	'--	'--	'--	'--	'--	'--	FALSE	'--	'--	false	'--	'--	'--	Blood Derived Normal	10	'--	released	'--	'--	'--	Not Reported	'--	'--	'--
TCGA-THCA	2ae6a00c-bc6e-42fe-a0cb-40339d5fdc73	TCGA-J8-A4HY	df7bb902-053a-4493-bcbb-1b17b96074ad	TCGA-J8-A4HY-01Z	'--	'--	'--	'--	'--	'--	0	'--	'--	'--	'--	'--	'--	'--	TRUE	'--	'--	No	'--	'--	FFPE	Primary Tumor	1	'--	released	'--	'--	'--	Not Reported	'--	'--	'--
TCGA-THCA	d92902ff-8023-411c-a7ca-1afcbb64937e	TCGA-FY-A3R9	29212c63-a547-4e3d-ad9e-d6e1a8b109cd	TCGA-FY-A3R9-01Z	'--	'--	'--	'--	'--	'--	0	'--	'--	'--	'--	'--	'--	'--	TRUE	'--	'--	No	'--	'--	FFPE	Primary Tumor	1	'--	released	'--	'--	'--	Not Reported	'--	'--	'--
TCGA-THCA	d92902ff-8023-411c-a7ca-1afcbb64937e	TCGA-FY-A3R9	e8dd42f0-e8ae-4003-b6a7-941ccedd14f0	TCGA-FY-A3R9-01A	'--	'--	'--	'--	'--	121	'--	'--	'--	'--	'--	'--	60.0	'--	FALSE	'--	'--	true	'--	312CB64B-BDC4-4B69-BBEA-EA51B2D349DA	'--	Primary Tumor	1	'--	released	'--	'--	'--	Not Reported	'--	'--	'--
TCGA-THCA	d92902ff-8023-411c-a7ca-1afcbb64937e	TCGA-FY-A3R9	43a8adb8-9cb1-459c-b856-9ad84c30c25d	TCGA-FY-A3R9-10A	'--	'--	'--	'--	'--	121	'--	'--	'--	'--	'--	'--	'--	'--	FALSE	'--	'--	false	'--	'--	'--	Blood Derived Normal	10	'--	released	'--	'--	'--	Not Reported	'--	'--	'--
TCGA-THCA	315cbbe8-62c8-488b-92c5-e2046321efb7	TCGA-EL-A3ZQ	39a70bf2-437c-4cbc-8667-e7dcecf1ae57	TCGA-EL-A3ZQ-01A	'--	'--	'--	'--	'--	1360	'--	'--	'--	'--	'--	'--	290.0	'--	FALSE	'--	'--	false	'--	1C104C06-BB8E-49C8-851E-79D0EC5C89B0	'--	Primary Tumor	1	'--	released	'--	'--	'--	Not Reported	'--	'--	'--
TCGA-THCA	315cbbe8-62c8-488b-92c5-e2046321efb7	TCGA-EL-A3ZQ	f3aa5531-097d-453c-93ad-1363c5ded4a4	TCGA-EL-A3ZQ-11A	'--	'--	'--	'--	'--	1360	'--	'--	'--	'--	'--	'--	230.0	'--	FALSE	'--	'--	false	'--	'--	'--	Solid Tissue Normal	11	'--	released	'--	'--	'--	Not Reported	'--	'--	'--
TCGA-THCA	315cbbe8-62c8-488b-92c5-e2046321efb7	TCGA-EL-A3ZQ	e9573d23-4e19-44f0-8eb6-f9a82d6ac5f1	TCGA-EL-A3ZQ-01Z	'--	'--	'--	'--	'--	'--	0	'--	'--	'--	'--	'--	'--	'--	TRUE	'--	'--	No	'--	'--	FFPE	Primary Tumor	1	'--	released	'--	'--	'--	Not Reported	'--	'--	'--
TCGA-THCA	3585ddab-fe5e-4a5a-92c7-3cbaff52af57	TCGA-EL-A3CP	309937a5-20bc-459f-b0f7-7a2428005561	TCGA-EL-A3CP-01A	'--	'--	'--	'--	'--	4341	'--	'--	'--	'--	'--	'--	230.0	'--	FALSE	'--	'--	true	'--	23E47F7A-AD84-45A5-B959-2E2290457BD3	'--	Primary Tumor	1	'--	released	'--	'--	'--	Not Reported	'--	'--	'--
TCGA-THCA	3585ddab-fe5e-4a5a-92c7-3cbaff52af57	TCGA-EL-A3CP	71d862c5-ded3-4326-8959-9f55e3e6d2b3	TCGA-EL-A3CP-01Z	'--	'--	'--	'--	'--	'--	0	'--	'--	'--	'--	'--	'--	'--	TRUE	'--	'--	No	'--	'--	FFPE	Primary Tumor	1	'--	released	'--	'--	'--	Not Reported	'--	'--	'--
TCGA-THCA	3585ddab-fe5e-4a5a-92c7-3cbaff52af57	TCGA-EL-A3CP	a5f9db9f-7b02-446a-9a5f-e7fc9b46da7e	TCGA-EL-A3CP-10A	'--	'--	'--	'--	'--	4341	'--	'--	'--	'--	'--	'--	'--	'--	FALSE	'--	'--	false	'--	'--	'--	Blood Derived Normal	10	'--	released	'--	'--	'--	Not Reported	'--	'--	'--
TCGA-THCA	46239f1e-bd85-4d7a-a313-762666599a6d	TCGA-ET-A3BU	58794594-06ea-4812-a3be-bbd784ae8d6d	TCGA-ET-A3BU-01Z	'--	'--	'--	'--	'--	'--	0	'--	'--	'--	'--	'--	'--	'--	TRUE	'--	'--	No	'--	'--	FFPE	Primary Tumor	1	'--	released	'--	'--	'--	Not Reported	'--	'--	'--
TCGA-THCA	46239f1e-bd85-4d7a-a313-762666599a6d	TCGA-ET-A3BU	1b0aafff-c814-479f-80a8-5d332062df74	TCGA-ET-A3BU-10A	'--	'--	'--	'--	'--	1102	'--	'--	'--	'--	'--	'--	'--	'--	FALSE	'--	'--	false	'--	'--	'--	Blood Derived Normal	10	'--	released	'--	'--	'--	Not Reported	'--	'--	'--
TCGA-THCA	46239f1e-bd85-4d7a-a313-762666599a6d	TCGA-ET-A3BU	2e84ea43-6b1b-4a6b-a020-ddc40305d18c	TCGA-ET-A3BU-01A	'--	'--	'--	'--	'--	1102	'--	'--	'--	'--	'--	'--	80.0	'--	FALSE	'--	'--	true	'--	5267B76A-3EFC-4B17-818D-FE8D97C4F3DF	'--	Primary Tumor	1	'--	released	'--	'--	'--	Not Reported	'--	'--	'--
TCGA-THCA	e4b08e66-0772-4956-8670-e5c6553eecbe	TCGA-DJ-A1QL	62b6d426-e1e4-48e8-bc8f-6b07c67cc0d0	TCGA-DJ-A1QL-01A	'--	'--	'--	'--	'--	153	'--	'--	'--	'--	'--	'--	370.0	'--	FALSE	'--	'--	true	'--	67D84E08-AE0D-458A-B886-94C22D856A52	'--	Primary Tumor	1	'--	released	'--	'--	'--	Not Reported	'--	'--	'--
TCGA-THCA	e4b08e66-0772-4956-8670-e5c6553eecbe	TCGA-DJ-A1QL	4a3ff681-4c8c-43da-bfc7-9cf2598375b4	TCGA-DJ-A1QL-10A	'--	'--	'--	'--	'--	153	'--	'--	'--	'--	'--	'--	'--	'--	FALSE	'--	'--	false	'--	'--	'--	Blood Derived Normal	10	'--	released	'--	'--	'--	Not Reported	'--	'--	'--
TCGA-THCA	e4b08e66-0772-4956-8670-e5c6553eecbe	TCGA-DJ-A1QL	a5e84d3f-8006-4e8a-b54d-ac2fe4eee9ae	TCGA-DJ-A1QL-01Z	'--	'--	'--	'--	'--	'--	0	'--	'--	'--	'--	'--	'--	'--	TRUE	'--	'--	No	'--	'--	FFPE	Primary Tumor	1	'--	released	'--	'--	'--	Not Reported	'--	'--	'--
TCGA-THCA	6ad260ad-769a-4f3c-bd07-927adf6b2338	TCGA-DE-A0Y2	8e3af0fc-266c-47e7-8fd0-25c2dbbfb372	TCGA-DE-A0Y2-10A	'--	'--	'--	'--	'--	188	'--	'--	'--	'--	'--	'--	'--	'--	FALSE	'--	'--	false	'--	'--	'--	Blood Derived Normal	10	'--	released	'--	'--	'--	Not Reported	'--	'--	'--
TCGA-THCA	6ad260ad-769a-4f3c-bd07-927adf6b2338	TCGA-DE-A0Y2	eb4feebb-293e-43e3-a2ed-344b17d180b3	TCGA-DE-A0Y2-01A	'--	'--	'--	'--	'--	188	'--	'--	'--	'--	'--	'--	190.0	'--	FALSE	'--	'--	false	'--	E564FC79-47F7-4CE8-873D-3A8B697C7FF8	'--	Primary Tumor	1	'--	released	'--	'--	'--	Not Reported	'--	'--	'--
TCGA-THCA	6ad260ad-769a-4f3c-bd07-927adf6b2338	TCGA-DE-A0Y2	33b0694c-d88f-4ea5-a41e-132bfc1d8875	TCGA-DE-A0Y2-01Z	'--	'--	'--	'--	'--	'--	0	'--	'--	'--	'--	'--	'--	'--	TRUE	'--	'--	No	'--	'--	FFPE	Primary Tumor	1	'--	released	'--	'--	'--	Not Reported	'--	'--	'--
TCGA-THCA	14591ce2-ed02-440d-8004-7ca0ad94d0a7	TCGA-EM-A3SX	1f6551ed-7984-4809-a3bb-b6b477816062	TCGA-EM-A3SX-01A	'--	'--	'--	'--	'--	183	'--	'--	'--	'--	'--	'--	130.0	'--	FALSE	'--	'--	false	'--	C4114C5A-DE73-499B-BED6-FC8F9976C3E2	'--	Primary Tumor	1	'--	released	'--	'--	'--	Not Reported	'--	'--	'--
TCGA-THCA	14591ce2-ed02-440d-8004-7ca0ad94d0a7	TCGA-EM-A3SX	63ef0b2b-6b5c-43c1-a143-83f71e0f4f09	TCGA-EM-A3SX-01Z	'--	'--	'--	'--	'--	'--	0	'--	'--	'--	'--	'--	'--	'--	TRUE	'--	'--	No	'--	'--	FFPE	Primary Tumor	1	'--	released	'--	'--	'--	Not Reported	'--	'--	'--
TCGA-THCA	14591ce2-ed02-440d-8004-7ca0ad94d0a7	TCGA-EM-A3SX	96b9c2e6-6319-4a1b-bf28-ac5b4e72c4a6	TCGA-EM-A3SX-10A	'--	'--	'--	'--	'--	240	'--	'--	'--	'--	'--	'--	'--	'--	FALSE	'--	'--	false	'--	'--	'--	Blood Derived Normal	10	'--	released	'--	'--	'--	Not Reported	'--	'--	'--
TCGA-THCA	86b82345-6f4d-44fd-a9db-6f107de62f53	TCGA-E8-A416	0ebc6051-5035-43f6-af5f-eacf32a4bf92	TCGA-E8-A416-10A	'--	'--	'--	'--	'--	66	'--	'--	'--	'--	'--	'--	'--	'--	FALSE	'--	'--	false	'--	'--	'--	Blood Derived Normal	10	'--	released	'--	'--	'--	Not Reported	'--	'--	'--
TCGA-THCA	86b82345-6f4d-44fd-a9db-6f107de62f53	TCGA-E8-A416	f68b88da-845d-4314-9400-c99c21dd5047	TCGA-E8-A416-01Z	'--	'--	'--	'--	'--	'--	0	'--	'--	'--	'--	'--	'--	'--	TRUE	'--	'--	No	'--	'--	FFPE	Primary Tumor	1	'--	released	'--	'--	'--	Not Reported	'--	'--	'--
TCGA-THCA	86b82345-6f4d-44fd-a9db-6f107de62f53	TCGA-E8-A416	af7b5868-2c11-4c74-8033-e914c987ece6	TCGA-E8-A416-01A	'--	'--	'--	'--	'--	66	'--	'--	'--	'--	'--	'--	330.0	'--	FALSE	'--	'--	true	'--	EC98D84D-CD30-4F1A-A262-2D835764A111	'--	Primary Tumor	1	'--	released	'--	'--	'--	Not Reported	'--	'--	'--
TCGA-THCA	f7f6e9f4-1aa8-48a0-bea9-efaa9379f6f6	TCGA-FY-A3NM	851b3d3d-bed1-4865-8163-f39a6caf0710	TCGA-FY-A3NM-01A	'--	'--	'--	'--	'--	88	'--	'--	'--	'--	'--	'--	60.0	'--	FALSE	'--	'--	false	'--	0411A69E-4F72-4043-B62C-9F5FC568E2E9	'--	Primary Tumor	1	'--	released	'--	'--	'--	Not Reported	'--	'--	'--
TCGA-THCA	f7f6e9f4-1aa8-48a0-bea9-efaa9379f6f6	TCGA-FY-A3NM	160b5ef1-2635-439d-a042-a230a9899c8c	TCGA-FY-A3NM-01Z	'--	'--	'--	'--	'--	'--	0	'--	'--	'--	'--	'--	'--	'--	TRUE	'--	'--	No	'--	'--	FFPE	Primary Tumor	1	'--	released	'--	'--	'--	Not Reported	'--	'--	'--
TCGA-THCA	f7f6e9f4-1aa8-48a0-bea9-efaa9379f6f6	TCGA-FY-A3NM	ca0f12d0-24ab-487a-9288-63a34129cbc4	TCGA-FY-A3NM-10A	'--	'--	'--	'--	'--	88	'--	'--	'--	'--	'--	'--	'--	'--	FALSE	'--	'--	false	'--	'--	'--	Blood Derived Normal	10	'--	released	'--	'--	'--	Not Reported	'--	'--	'--
TCGA-THCA	a09d0be0-fd41-4b30-b488-9a9f2abef8e7	TCGA-EL-A3TB	11671156-4bbf-4a3c-b074-7d6c27ee4fee	TCGA-EL-A3TB-01A	'--	'--	'--	'--	'--	2443	'--	'--	'--	'--	'--	'--	220.0	'--	FALSE	'--	'--	true	'--	606BB6D2-537E-4C63-A696-5A8D8BB7A826	'--	Primary Tumor	1	'--	released	'--	'--	'--	Not Reported	'--	'--	'--
TCGA-THCA	a09d0be0-fd41-4b30-b488-9a9f2abef8e7	TCGA-EL-A3TB	51cab937-04d8-4b83-b4cb-009373e49075	TCGA-EL-A3TB-01Z	'--	'--	'--	'--	'--	'--	0	'--	'--	'--	'--	'--	'--	'--	TRUE	'--	'--	No	'--	'--	FFPE	Primary Tumor	1	'--	released	'--	'--	'--	Not Reported	'--	'--	'--
TCGA-THCA	a09d0be0-fd41-4b30-b488-9a9f2abef8e7	TCGA-EL-A3TB	0bb0685e-c618-44e0-9f1c-3b5acf19f58d	TCGA-EL-A3TB-11A	'--	'--	'--	'--	'--	2443	'--	'--	'--	'--	'--	'--	260.0	'--	FALSE	'--	'--	true	'--	'--	'--	Solid Tissue Normal	11	'--	released	'--	'--	'--	Not Reported	'--	'--	'--
TCGA-THCA	4e227a7a-b885-4e9b-a4c2-aad9e6c154e5	TCGA-J8-A3YD	74d58c53-f9dc-41af-8063-532b36212d67	TCGA-J8-A3YD-10A	'--	'--	'--	'--	'--	1045	'--	'--	'--	'--	'--	'--	'--	'--	FALSE	'--	'--	false	'--	'--	'--	Blood Derived Normal	10	'--	released	'--	'--	'--	Not Reported	'--	'--	'--
TCGA-THCA	4e227a7a-b885-4e9b-a4c2-aad9e6c154e5	TCGA-J8-A3YD	793dcf0c-fd34-497b-b32d-27bdc69939cc	TCGA-J8-A3YD-01Z	'--	'--	'--	'--	'--	'--	0	'--	'--	'--	'--	'--	'--	'--	TRUE	'--	'--	No	'--	'--	FFPE	Primary Tumor	1	'--	released	'--	'--	'--	Not Reported	'--	'--	'--
TCGA-THCA	4e227a7a-b885-4e9b-a4c2-aad9e6c154e5	TCGA-J8-A3YD	acd56b0e-d212-43b3-be6f-be188781130a	TCGA-J8-A3YD-01A	'--	'--	'--	'--	'--	1045	'--	'--	'--	'--	'--	'--	40.0	'--	FALSE	'--	'--	true	'--	8D2F7D6B-AF3B-4F61-91DD-8C84A3A2B0AD	'--	Primary Tumor	1	'--	released	'--	'--	'--	Not Reported	'--	'--	'--
TCGA-THCA	9a19f08b-386a-40b1-b694-78e8556a6caa	TCGA-ET-A39R	4e9b3a06-1d3f-43d1-bf0b-1355e0f70054	TCGA-ET-A39R-01Z	'--	'--	'--	'--	'--	'--	0	'--	'--	'--	'--	'--	'--	'--	TRUE	'--	'--	No	'--	'--	FFPE	Primary Tumor	1	'--	released	'--	'--	'--	Not Reported	'--	'--	'--
TCGA-THCA	9a19f08b-386a-40b1-b694-78e8556a6caa	TCGA-ET-A39R	4508baf5-ec75-4c7a-8f69-fbd7f6b43a6c	TCGA-ET-A39R-01A	'--	'--	'--	'--	'--	1583	'--	'--	'--	'--	'--	'--	170.0	'--	FALSE	'--	'--	true	'--	637F519B-25EE-4744-8925-5EB307E08B5C	'--	Primary Tumor	1	'--	released	'--	'--	'--	Not Reported	'--	'--	'--
TCGA-THCA	9a19f08b-386a-40b1-b694-78e8556a6caa	TCGA-ET-A39R	ce5c7a72-3335-4682-b8e8-dc375395ddd2	TCGA-ET-A39R-10A	'--	'--	'--	'--	'--	1583	'--	'--	'--	'--	'--	'--	'--	'--	FALSE	'--	'--	false	'--	'--	'--	Blood Derived Normal	10	'--	released	'--	'--	'--	Not Reported	'--	'--	'--
TCGA-THCA	6491d025-c061-4180-bfd4-d7c6e6e55f66	TCGA-EM-A3AN	f5b8976b-f31f-42ca-af42-9df82165d5b4	TCGA-EM-A3AN-01A	'--	'--	'--	'--	'--	162	'--	'--	'--	'--	'--	'--	120.0	'--	FALSE	'--	'--	false	'--	44BB965E-D260-47EA-9FA9-C5CEEED6C0F6	'--	Primary Tumor	1	'--	released	'--	'--	'--	Not Reported	'--	'--	'--
TCGA-THCA	6491d025-c061-4180-bfd4-d7c6e6e55f66	TCGA-EM-A3AN	17fed624-5f49-4db4-ae39-4f3596226ff2	TCGA-EM-A3AN-10A	'--	'--	'--	'--	'--	219	'--	'--	'--	'--	'--	'--	'--	'--	FALSE	'--	'--	false	'--	'--	'--	Blood Derived Normal	10	'--	released	'--	'--	'--	Not Reported	'--	'--	'--
TCGA-THCA	6491d025-c061-4180-bfd4-d7c6e6e55f66	TCGA-EM-A3AN	b6935b55-4fdc-433c-b7d2-de15c6bebfe3	TCGA-EM-A3AN-01Z	'--	'--	'--	'--	'--	'--	0	'--	'--	'--	'--	'--	'--	'--	TRUE	'--	'--	No	'--	'--	FFPE	Primary Tumor	1	'--	released	'--	'--	'--	Not Reported	'--	'--	'--
TCGA-THCA	229004af-14eb-442e-905e-61c842b3efa0	TCGA-EL-A3CM	bd4d0c46-31d8-42d0-bd27-fd528210e103	TCGA-EL-A3CM-10A	'--	'--	'--	'--	'--	5462	'--	'--	'--	'--	'--	'--	'--	'--	FALSE	'--	'--	false	'--	'--	'--	Blood Derived Normal	10	'--	released	'--	'--	'--	Not Reported	'--	'--	'--
TCGA-THCA	229004af-14eb-442e-905e-61c842b3efa0	TCGA-EL-A3CM	cd2ed2bf-68e0-4444-a001-628838699cb8	TCGA-EL-A3CM-01Z	'--	'--	'--	'--	'--	'--	0	'--	'--	'--	'--	'--	'--	'--	TRUE	'--	'--	No	'--	'--	FFPE	Primary Tumor	1	'--	released	'--	'--	'--	Not Reported	'--	'--	'--
TCGA-THCA	229004af-14eb-442e-905e-61c842b3efa0	TCGA-EL-A3CM	3fdb3d6d-e8ff-4b5b-83c5-63265a4c915e	TCGA-EL-A3CM-01A	'--	'--	'--	'--	'--	5462	'--	'--	'--	'--	'--	'--	260.0	'--	FALSE	'--	'--	true	'--	FE838902-B02D-4EA3-A810-4486F7FE8F0C	'--	Primary Tumor	1	'--	released	'--	'--	'--	Not Reported	'--	'--	'--
TCGA-THCA	e8d74dbb-410c-4f8f-8e1f-2b2dd7634160	TCGA-BJ-A2P4	ed40c50c-515e-4ed9-8589-70fbb22785cc	TCGA-BJ-A2P4-10A	'--	'--	'--	'--	'--	201	'--	'--	'--	'--	'--	'--	'--	'--	FALSE	'--	'--	false	'--	'--	'--	Blood Derived Normal	10	'--	released	'--	'--	'--	Not Reported	'--	'--	'--
TCGA-THCA	e8d74dbb-410c-4f8f-8e1f-2b2dd7634160	TCGA-BJ-A2P4	1a705581-3b92-4648-a84f-3d964364a6c6	TCGA-BJ-A2P4-01A	'--	'--	'--	'--	'--	201	'--	'--	'--	'--	'--	'--	210.0	'--	FALSE	'--	'--	true	'--	A2756544-345C-4797-9DDE-B56048CF0009	'--	Primary Tumor	1	'--	released	'--	'--	'--	Not Reported	'--	'--	'--
TCGA-THCA	e8d74dbb-410c-4f8f-8e1f-2b2dd7634160	TCGA-BJ-A2P4	638530d7-f7ae-4e7d-856d-5e24a6cf934e	TCGA-BJ-A2P4-01Z	'--	'--	'--	'--	'--	'--	0	'--	'--	'--	'--	'--	'--	'--	TRUE	'--	'--	No	'--	'--	FFPE	Primary Tumor	1	'--	released	'--	'--	'--	Not Reported	'--	'--	'--
TCGA-THCA	53ba15c0-780e-4153-a612-046f1b24b4b3	TCGA-FY-A3TY	8453b1ad-800a-4e7c-b102-eb756908b20a	TCGA-FY-A3TY-11A	'--	'--	'--	'--	'--	49	'--	'--	'--	'--	'--	'--	70.0	'--	FALSE	'--	'--	false	'--	'--	'--	Solid Tissue Normal	11	'--	released	'--	'--	'--	Not Reported	'--	'--	'--
TCGA-THCA	53ba15c0-780e-4153-a612-046f1b24b4b3	TCGA-FY-A3TY	f32b85c6-fdf1-456c-af88-091bcb006c9f	TCGA-FY-A3TY-01A	'--	'--	'--	'--	'--	49	'--	'--	'--	'--	'--	'--	160.0	'--	FALSE	'--	'--	false	'--	BE77789A-ACE9-4D62-887E-BB2810470B94	'--	Primary Tumor	1	'--	released	'--	'--	'--	Not Reported	'--	'--	'--
TCGA-THCA	53ba15c0-780e-4153-a612-046f1b24b4b3	TCGA-FY-A3TY	3e9b9307-1156-4fb2-815e-7623aeae1ca0	TCGA-FY-A3TY-10A	'--	'--	'--	'--	'--	49	'--	'--	'--	'--	'--	'--	'--	'--	FALSE	'--	'--	false	'--	'--	'--	Blood Derived Normal	10	'--	released	'--	'--	'--	Not Reported	'--	'--	'--
TCGA-THCA	53ba15c0-780e-4153-a612-046f1b24b4b3	TCGA-FY-A3TY	89346beb-d7e1-4f29-8b45-14ab5fb30e79	TCGA-FY-A3TY-01Z	'--	'--	'--	'--	'--	'--	0	'--	'--	'--	'--	'--	'--	'--	TRUE	'--	'--	No	'--	'--	FFPE	Primary Tumor	1	'--	released	'--	'--	'--	Not Reported	'--	'--	'--
TCGA-THCA	6f77fc81-1bf4-47c8-b1d8-78bb17cb13f8	TCGA-EL-A4JV	72f8adad-5b32-4a07-a944-79afab89d357	TCGA-EL-A4JV-11A	'--	'--	'--	'--	'--	1304	'--	'--	'--	'--	'--	'--	200.0	'--	FALSE	'--	'--	false	'--	'--	'--	Solid Tissue Normal	11	'--	released	'--	'--	'--	Not Reported	'--	'--	'--
TCGA-THCA	6f77fc81-1bf4-47c8-b1d8-78bb17cb13f8	TCGA-EL-A4JV	fd18f650-4f93-4888-9683-c9160af94baf	TCGA-EL-A4JV-01A	'--	'--	'--	'--	'--	1304	'--	'--	'--	'--	'--	'--	260.0	'--	FALSE	'--	'--	false	'--	1131E38A-38F4-4187-85E4-AC1B3195C59F	'--	Primary Tumor	1	'--	released	'--	'--	'--	Not Reported	'--	'--	'--
TCGA-THCA	6f77fc81-1bf4-47c8-b1d8-78bb17cb13f8	TCGA-EL-A4JV	c0d1689b-16c6-409a-8895-d2b878f6d9bf	TCGA-EL-A4JV-01Z	'--	'--	'--	'--	'--	'--	0	'--	'--	'--	'--	'--	'--	'--	TRUE	'--	'--	No	'--	'--	FFPE	Primary Tumor	1	'--	released	'--	'--	'--	Not Reported	'--	'--	'--
TCGA-THCA	efc46db7-f9df-494e-acca-357cb64c019a	TCGA-E8-A434	1fa47fe5-cb01-4566-9558-5bad3c873bf4	TCGA-E8-A434-10A	'--	'--	'--	'--	'--	86	'--	'--	'--	'--	'--	'--	'--	'--	FALSE	'--	'--	false	'--	'--	'--	Blood Derived Normal	10	'--	released	'--	'--	'--	Not Reported	'--	'--	'--
TCGA-THCA	efc46db7-f9df-494e-acca-357cb64c019a	TCGA-E8-A434	88066230-4e15-4043-ae89-32aa2ff6fe7f	TCGA-E8-A434-01Z	'--	'--	'--	'--	'--	'--	0	'--	'--	'--	'--	'--	'--	'--	TRUE	'--	'--	No	'--	'--	FFPE	Primary Tumor	1	'--	released	'--	'--	'--	Not Reported	'--	'--	'--
TCGA-THCA	efc46db7-f9df-494e-acca-357cb64c019a	TCGA-E8-A434	cb3efc94-0f31-44e0-ba69-4eb7cbedebb3	TCGA-E8-A434-01A	'--	'--	'--	'--	'--	86	'--	'--	'--	'--	'--	'--	250.0	'--	FALSE	'--	'--	true	'--	CA8D2EDB-85CA-4F57-8357-17B2D0E702C8	'--	Primary Tumor	1	'--	released	'--	'--	'--	Not Reported	'--	'--	'--
TCGA-THCA	7629f864-a009-4aa9-bf7e-2d99e00d294e	TCGA-ET-A4KN	d107589c-b718-49c9-93b5-dc208c75993a	TCGA-ET-A4KN-10A	'--	'--	'--	'--	'--	108	'--	'--	'--	'--	'--	'--	'--	'--	FALSE	'--	'--	false	'--	'--	'--	Blood Derived Normal	10	'--	released	'--	'--	'--	Not Reported	'--	'--	'--
TCGA-THCA	7629f864-a009-4aa9-bf7e-2d99e00d294e	TCGA-ET-A4KN	e01d507c-8e8e-45c6-b4ef-193177a382c4	TCGA-ET-A4KN-01A	'--	'--	'--	'--	'--	108	'--	'--	'--	'--	'--	'--	170.0	'--	FALSE	'--	'--	true	'--	440686B6-A7D3-4817-9CBB-2C0CEA3C440D	'--	Primary Tumor	1	'--	released	'--	'--	'--	Not Reported	'--	'--	'--
TCGA-THCA	7629f864-a009-4aa9-bf7e-2d99e00d294e	TCGA-ET-A4KN	f27d6c50-3120-4268-a9ec-9676a44e1fa3	TCGA-ET-A4KN-01Z	'--	'--	'--	'--	'--	'--	0	'--	'--	'--	'--	'--	'--	'--	TRUE	'--	'--	No	'--	'--	FFPE	Primary Tumor	1	'--	released	'--	'--	'--	Not Reported	'--	'--	'--
TCGA-THCA	86f9eca0-d1ea-4375-a6bc-055e44b3198a	TCGA-BJ-A0Z9	c42d7353-3155-4f95-8557-1f0dd786b1c1	TCGA-BJ-A0Z9-10A	'--	'--	'--	'--	'--	152	'--	'--	'--	'--	'--	'--	'--	'--	FALSE	'--	'--	false	'--	'--	'--	Blood Derived Normal	10	'--	released	'--	'--	'--	Not Reported	'--	'--	'--
TCGA-THCA	86f9eca0-d1ea-4375-a6bc-055e44b3198a	TCGA-BJ-A0Z9	aa8578fe-edb2-4137-b363-feb2c27d475a	TCGA-BJ-A0Z9-01A	'--	'--	'--	'--	'--	152	'--	'--	'--	'--	'--	'--	370.0	'--	FALSE	'--	'--	true	'--	978BAD0D-EC7B-4E7A-AB18-8507DDAF1266	'--	Primary Tumor	1	'--	released	'--	'--	'--	Not Reported	'--	'--	'--
TCGA-THCA	86f9eca0-d1ea-4375-a6bc-055e44b3198a	TCGA-BJ-A0Z9	43638be9-5ab0-40eb-a84f-7c6a136aa688	TCGA-BJ-A0Z9-01Z	'--	'--	'--	'--	'--	'--	0	'--	'--	'--	'--	'--	'--	'--	TRUE	'--	'--	No	'--	'--	FFPE	Primary Tumor	1	'--	released	'--	'--	'--	Not Reported	'--	'--	'--
TCGA-THCA	e95c7f24-89ab-4d56-aae6-d2268888c549	TCGA-EL-A3GV	a7d31c23-c222-48af-a389-ab1a99449610	TCGA-EL-A3GV-01A	'--	'--	'--	'--	'--	1095	'--	'--	'--	'--	'--	'--	240.0	'--	FALSE	'--	'--	false	'--	96FB4A04-40F7-4E07-9FAD-334AFFEF232C	'--	Primary Tumor	1	'--	released	'--	'--	'--	Not Reported	'--	'--	'--
TCGA-THCA	e95c7f24-89ab-4d56-aae6-d2268888c549	TCGA-EL-A3GV	606ec8df-8744-4685-ac07-f1be22e58c99	TCGA-EL-A3GV-01Z	'--	'--	'--	'--	'--	'--	0	'--	'--	'--	'--	'--	'--	'--	TRUE	'--	'--	No	'--	'--	FFPE	Primary Tumor	1	'--	released	'--	'--	'--	Not Reported	'--	'--	'--
TCGA-THCA	e95c7f24-89ab-4d56-aae6-d2268888c549	TCGA-EL-A3GV	f60206c7-be1c-4bc3-970a-f8c47bb9669d	TCGA-EL-A3GV-10A	'--	'--	'--	'--	'--	1095	'--	'--	'--	'--	'--	'--	'--	'--	FALSE	'--	'--	false	'--	'--	'--	Blood Derived Normal	10	'--	released	'--	'--	'--	Not Reported	'--	'--	'--
TCGA-THCA	52bc133b-8a10-4c9b-adc3-22910a191e6b	TCGA-KS-A4I9	d5ce1244-2835-4c48-9ec0-c7b508cb871d	TCGA-KS-A4I9-01Z	'--	'--	'--	'--	'--	'--	0	'--	'--	'--	'--	'--	'--	'--	TRUE	'--	'--	No	'--	'--	FFPE	Primary Tumor	1	'--	released	'--	'--	'--	Not Reported	'--	'--	'--
TCGA-THCA	52bc133b-8a10-4c9b-adc3-22910a191e6b	TCGA-KS-A4I9	aa007e4c-e9af-490b-9cd8-45d6c3c8aa99	TCGA-KS-A4I9-01A	'--	'--	'--	'--	'--	2064	'--	'--	'--	'--	'--	'--	80.0	'--	FALSE	'--	'--	false	'--	C4D74382-93BC-4798-83C5-DD669AD67794	'--	Primary Tumor	1	'--	released	'--	'--	'--	Not Reported	'--	'--	'--
TCGA-THCA	52bc133b-8a10-4c9b-adc3-22910a191e6b	TCGA-KS-A4I9	adddaa54-2eaf-4fda-9bf3-ac04cd07fb1f	TCGA-KS-A4I9-11A	'--	'--	'--	'--	'--	2064	'--	'--	'--	'--	'--	'--	100.0	'--	FALSE	'--	'--	false	'--	'--	'--	Solid Tissue Normal	11	'--	released	'--	'--	'--	Not Reported	'--	'--	'--
TCGA-THCA	8392edea-82b3-4610-87a0-f545f673e922	TCGA-IM-A3U2	5adc18e7-6ce3-49b0-abf0-32d2f48c5cc8	TCGA-IM-A3U2-10A	'--	'--	'--	'--	'--	35	'--	'--	'--	'--	'--	'--	'--	'--	FALSE	'--	'--	false	'--	'--	'--	Blood Derived Normal	10	'--	released	'--	'--	'--	Not Reported	'--	'--	'--
TCGA-THCA	8392edea-82b3-4610-87a0-f545f673e922	TCGA-IM-A3U2	6ca2d4a2-0916-4be1-abf0-9cecd31cb3a7	TCGA-IM-A3U2-01Z	'--	'--	'--	'--	'--	'--	0	'--	'--	'--	'--	'--	'--	'--	TRUE	'--	'--	No	'--	'--	FFPE	Primary Tumor	1	'--	released	'--	'--	'--	Not Reported	'--	'--	'--
TCGA-THCA	8392edea-82b3-4610-87a0-f545f673e922	TCGA-IM-A3U2	09808dcb-1011-43ff-8782-5a367df02a3c	TCGA-IM-A3U2-01A	'--	'--	'--	'--	'--	35	'--	'--	'--	'--	'--	'--	80.0	'--	FALSE	'--	'--	true	'--	77A0F952-13A6-44CF-81DB-67E4C21A530A	'--	Primary Tumor	1	'--	released	'--	'--	'--	Not Reported	'--	'--	'--
TCGA-THCA	c9c00e4f-4092-400e-aebb-3d9961be0f0e	TCGA-EM-A3FJ	0294330f-ee3d-41d2-8ba2-89c941230917	TCGA-EM-A3FJ-01A	'--	'--	'--	'--	'--	500	'--	'--	'--	'--	'--	'--	90.0	'--	FALSE	'--	'--	false	'--	21F5F753-2DE9-4DB8-9006-768229687C1C	'--	Primary Tumor	1	'--	released	'--	'--	'--	Not Reported	'--	'--	'--
TCGA-THCA	c9c00e4f-4092-400e-aebb-3d9961be0f0e	TCGA-EM-A3FJ	07dd5d06-2900-4a62-b85d-59865fe6542b	TCGA-EM-A3FJ-10A	'--	'--	'--	'--	'--	563	'--	'--	'--	'--	'--	'--	'--	'--	FALSE	'--	'--	false	'--	'--	'--	Blood Derived Normal	10	'--	released	'--	'--	'--	Not Reported	'--	'--	'--
TCGA-THCA	c9c00e4f-4092-400e-aebb-3d9961be0f0e	TCGA-EM-A3FJ	147c2228-950c-48e3-b6ed-9027ae86e1e6	TCGA-EM-A3FJ-01Z	'--	'--	'--	'--	'--	'--	0	'--	'--	'--	'--	'--	'--	'--	TRUE	'--	'--	No	'--	'--	FFPE	Primary Tumor	1	'--	released	'--	'--	'--	Not Reported	'--	'--	'--
TCGA-THCA	76c4d298-6f17-4f11-a706-cd844a0e0914	TCGA-DJ-A3V6	fbc09916-a53c-4d56-8cd5-259e8918f3de	TCGA-DJ-A3V6-01A	'--	'--	'--	'--	'--	378	'--	'--	'--	'--	'--	'--	190.0	'--	FALSE	'--	'--	true	'--	C6F0A1E3-BFC0-4458-8FB0-824FE6DB3086	'--	Primary Tumor	1	'--	released	'--	'--	'--	Not Reported	'--	'--	'--
TCGA-THCA	76c4d298-6f17-4f11-a706-cd844a0e0914	TCGA-DJ-A3V6	a37141c1-1b27-4bd4-8dfd-ea84dcd77499	TCGA-DJ-A3V6-10A	'--	'--	'--	'--	'--	378	'--	'--	'--	'--	'--	'--	'--	'--	FALSE	'--	'--	false	'--	'--	'--	Blood Derived Normal	10	'--	released	'--	'--	'--	Not Reported	'--	'--	'--
TCGA-THCA	76c4d298-6f17-4f11-a706-cd844a0e0914	TCGA-DJ-A3V6	be3a8363-6734-45a4-b519-cae6f35b9e67	TCGA-DJ-A3V6-01Z	'--	'--	'--	'--	'--	'--	0	'--	'--	'--	'--	'--	'--	'--	TRUE	'--	'--	No	'--	'--	FFPE	Primary Tumor	1	'--	released	'--	'--	'--	Not Reported	'--	'--	'--
TCGA-THCA	a3b49c90-fa9f-4189-a442-64ec1ad97a01	TCGA-DJ-A3V8	719e0f6e-725c-4606-8110-93b7893270e2	TCGA-DJ-A3V8-10A	'--	'--	'--	'--	'--	248	'--	'--	'--	'--	'--	'--	'--	'--	FALSE	'--	'--	false	'--	'--	'--	Blood Derived Normal	10	'--	released	'--	'--	'--	Not Reported	'--	'--	'--
TCGA-THCA	a3b49c90-fa9f-4189-a442-64ec1ad97a01	TCGA-DJ-A3V8	152a2105-2b04-408f-aaaa-3f6eaf58f845	TCGA-DJ-A3V8-01A	'--	'--	'--	'--	'--	248	'--	'--	'--	'--	'--	'--	80.0	'--	FALSE	'--	'--	true	'--	DB6D3411-CF40-470F-8BE5-E4AC3CCD8437	'--	Primary Tumor	1	'--	released	'--	'--	'--	Not Reported	'--	'--	'--
TCGA-THCA	a3b49c90-fa9f-4189-a442-64ec1ad97a01	TCGA-DJ-A3V8	1579473a-cfaa-47bf-8c1d-c3e1ace2b6b6	TCGA-DJ-A3V8-01Z	'--	'--	'--	'--	'--	'--	0	'--	'--	'--	'--	'--	'--	'--	TRUE	'--	'--	No	'--	'--	FFPE	Primary Tumor	1	'--	released	'--	'--	'--	Not Reported	'--	'--	'--
TCGA-THCA	ca95a11c-b54c-409e-b9a0-da850945033d	TCGA-DJ-A13P	ffbe4827-ceb9-4699-9475-f1527420d17a	TCGA-DJ-A13P-01Z	'--	'--	'--	'--	'--	'--	0	'--	'--	'--	'--	'--	'--	'--	TRUE	'--	'--	No	'--	'--	FFPE	Primary Tumor	1	'--	released	'--	'--	'--	Not Reported	'--	'--	'--
TCGA-THCA	ca95a11c-b54c-409e-b9a0-da850945033d	TCGA-DJ-A13P	74fe8c42-926c-43eb-81d0-cf4e56c9dc12	TCGA-DJ-A13P-10A	'--	'--	'--	'--	'--	4082	'--	'--	'--	'--	'--	'--	'--	'--	FALSE	'--	'--	false	'--	'--	'--	Blood Derived Normal	10	'--	released	'--	'--	'--	Not Reported	'--	'--	'--
TCGA-THCA	ca95a11c-b54c-409e-b9a0-da850945033d	TCGA-DJ-A13P	efad8b07-b295-468f-a836-f94029aec777	TCGA-DJ-A13P-01A	'--	'--	'--	'--	'--	4082	'--	'--	'--	'--	'--	'--	70.0	'--	FALSE	'--	'--	true	'--	3F98A8C0-C41C-4AA2-BBBC-2EA56B3EFBBD	'--	Primary Tumor	1	'--	released	'--	'--	'--	Not Reported	'--	'--	'--
TCGA-THCA	7b46ee87-e976-41bf-bdf1-9bff58f8314e	TCGA-DJ-A3V2	0d939e6c-4be7-4a19-91fd-419b9a7ad3b4	TCGA-DJ-A3V2-01Z	'--	'--	'--	'--	'--	'--	0	'--	'--	'--	'--	'--	'--	'--	TRUE	'--	'--	No	'--	'--	FFPE	Primary Tumor	1	'--	released	'--	'--	'--	Not Reported	'--	'--	'--
TCGA-THCA	7b46ee87-e976-41bf-bdf1-9bff58f8314e	TCGA-DJ-A3V2	245c5a31-a8d2-4c79-88ff-579d9248de6e	TCGA-DJ-A3V2-01A	'--	'--	'--	'--	'--	295	'--	'--	'--	'--	'--	'--	210.0	'--	FALSE	'--	'--	true	'--	7F24A721-5F52-4FEE-B832-3CC0614C9E46	'--	Primary Tumor	1	'--	released	'--	'--	'--	Not Reported	'--	'--	'--
TCGA-THCA	7b46ee87-e976-41bf-bdf1-9bff58f8314e	TCGA-DJ-A3V2	5960c01b-08c2-4493-80da-b27f12762005	TCGA-DJ-A3V2-10A	'--	'--	'--	'--	'--	295	'--	'--	'--	'--	'--	'--	'--	'--	FALSE	'--	'--	false	'--	'--	'--	Blood Derived Normal	10	'--	released	'--	'--	'--	Not Reported	'--	'--	'--
TCGA-THCA	f9217c58-11ef-4c4b-99cf-0e134a718552	TCGA-ET-A3DQ	3c8b7dba-cf05-461b-908f-56fbb0ddd64b	TCGA-ET-A3DQ-01A	'--	'--	'--	'--	'--	1351	'--	'--	'--	'--	'--	'--	60.0	'--	FALSE	'--	'--	true	'--	C6AC3695-85B8-400F-A539-54305CD46DFF	'--	Primary Tumor	1	'--	released	'--	'--	'--	Not Reported	'--	'--	'--
TCGA-THCA	f9217c58-11ef-4c4b-99cf-0e134a718552	TCGA-ET-A3DQ	2279378d-5476-4a54-9c13-6da05fa7f25f	TCGA-ET-A3DQ-10A	'--	'--	'--	'--	'--	1351	'--	'--	'--	'--	'--	'--	'--	'--	FALSE	'--	'--	false	'--	'--	'--	Blood Derived Normal	10	'--	released	'--	'--	'--	Not Reported	'--	'--	'--
TCGA-THCA	f9217c58-11ef-4c4b-99cf-0e134a718552	TCGA-ET-A3DQ	51dc872c-0a3e-4663-812e-39ebd0caeed5	TCGA-ET-A3DQ-01Z	'--	'--	'--	'--	'--	'--	0	'--	'--	'--	'--	'--	'--	'--	TRUE	'--	'--	No	'--	'--	FFPE	Primary Tumor	1	'--	released	'--	'--	'--	Not Reported	'--	'--	'--
TCGA-THCA	fb14bd0d-b356-42a4-a0e9-2fcdada8f76b	TCGA-J8-A3O1	a40ceade-4381-4cf2-b676-01091303a405	TCGA-J8-A3O1-01Z	'--	'--	'--	'--	'--	'--	0	'--	'--	'--	'--	'--	'--	'--	TRUE	'--	'--	No	'--	'--	FFPE	Primary Tumor	1	'--	released	'--	'--	'--	Not Reported	'--	'--	'--
TCGA-THCA	fb14bd0d-b356-42a4-a0e9-2fcdada8f76b	TCGA-J8-A3O1	cec92252-3d4b-4a99-aec0-05d7e348073f	TCGA-J8-A3O1-10A	'--	'--	'--	'--	'--	575	'--	'--	'--	'--	'--	'--	'--	'--	FALSE	'--	'--	false	'--	'--	'--	Blood Derived Normal	10	'--	released	'--	'--	'--	Not Reported	'--	'--	'--
TCGA-THCA	fb14bd0d-b356-42a4-a0e9-2fcdada8f76b	TCGA-J8-A3O1	beaa3de4-c835-4181-a749-f2c61eaacc2d	TCGA-J8-A3O1-01A	'--	'--	'--	'--	'--	575	'--	'--	'--	'--	'--	'--	490.0	'--	FALSE	'--	'--	true	'--	08ABFE9F-B5B1-49F3-907A-7E9BF2556180	'--	Primary Tumor	1	'--	released	'--	'--	'--	Not Reported	'--	'--	'--
TCGA-THCA	77d5b246-33ba-4a96-9d73-06aca797653e	TCGA-DJ-A13O	457b11c0-3c36-4907-8c76-60e3861ebabb	TCGA-DJ-A13O-01A	'--	'--	'--	'--	'--	135	'--	'--	'--	'--	'--	'--	170.0	'--	FALSE	'--	'--	true	'--	607A9AB4-E9E6-434A-AF81-C11035C93174	'--	Primary Tumor	1	'--	released	'--	'--	'--	Not Reported	'--	'--	'--
TCGA-THCA	77d5b246-33ba-4a96-9d73-06aca797653e	TCGA-DJ-A13O	a79ec95f-6285-4f6b-a9a1-4957f4f29172	TCGA-DJ-A13O-10A	'--	'--	'--	'--	'--	135	'--	'--	'--	'--	'--	'--	'--	'--	FALSE	'--	'--	false	'--	'--	'--	Blood Derived Normal	10	'--	released	'--	'--	'--	Not Reported	'--	'--	'--
TCGA-THCA	77d5b246-33ba-4a96-9d73-06aca797653e	TCGA-DJ-A13O	3b537354-4cfc-4ede-8dd5-eda60c0e7b7d	TCGA-DJ-A13O-01Z	'--	'--	'--	'--	'--	'--	0	'--	'--	'--	'--	'--	'--	'--	TRUE	'--	'--	No	'--	'--	FFPE	Primary Tumor	1	'--	released	'--	'--	'--	Not Reported	'--	'--	'--
TCGA-THCA	40a9c1d3-6629-4e22-a783-12e0d48349d1	TCGA-EL-A3H5	fc5aa545-07cc-4ad8-9eba-5b5d4ea186fb	TCGA-EL-A3H5-10A	'--	'--	'--	'--	'--	1508	'--	'--	'--	'--	'--	'--	'--	'--	FALSE	'--	'--	false	'--	'--	'--	Blood Derived Normal	10	'--	released	'--	'--	'--	Not Reported	'--	'--	'--
TCGA-THCA	40a9c1d3-6629-4e22-a783-12e0d48349d1	TCGA-EL-A3H5	9261863a-5c8b-4593-8dc1-38017b26d2eb	TCGA-EL-A3H5-01A	'--	'--	'--	'--	'--	1508	'--	'--	'--	'--	'--	'--	210.0	'--	FALSE	'--	'--	false	'--	9C354A78-E8E2-4A4C-8D7C-87A961A7AE40	'--	Primary Tumor	1	'--	released	'--	'--	'--	Not Reported	'--	'--	'--
TCGA-THCA	40a9c1d3-6629-4e22-a783-12e0d48349d1	TCGA-EL-A3H5	2c193698-3006-48b8-a8ce-95567f4cb3f3	TCGA-EL-A3H5-01Z	'--	'--	'--	'--	'--	'--	0	'--	'--	'--	'--	'--	'--	'--	TRUE	'--	'--	No	'--	'--	FFPE	Primary Tumor	1	'--	released	'--	'--	'--	Not Reported	'--	'--	'--
TCGA-THCA	7ef22138-ac76-4846-b3bb-ddf1efb96531	TCGA-FY-A3W9	916c9ecf-a8e0-4a2d-b1b3-4dc34f83584b	TCGA-FY-A3W9-01Z	'--	'--	'--	'--	'--	'--	0	'--	'--	'--	'--	'--	'--	'--	TRUE	'--	'--	No	'--	'--	FFPE	Primary Tumor	1	'--	released	'--	'--	'--	Not Reported	'--	'--	'--
TCGA-THCA	7ef22138-ac76-4846-b3bb-ddf1efb96531	TCGA-FY-A3W9	3e9a8137-7ad9-42ec-b94b-de6f43852eac	TCGA-FY-A3W9-01A	'--	'--	'--	'--	'--	72	'--	'--	'--	'--	'--	'--	190.0	'--	FALSE	'--	'--	false	'--	1396A81D-089B-4E98-A099-E15AFABE4191	'--	Primary Tumor	1	'--	released	'--	'--	'--	Not Reported	'--	'--	'--
TCGA-THCA	7ef22138-ac76-4846-b3bb-ddf1efb96531	TCGA-FY-A3W9	a8c90849-33ea-43a4-af48-d961f48e1237	TCGA-FY-A3W9-10A	'--	'--	'--	'--	'--	72	'--	'--	'--	'--	'--	'--	'--	'--	FALSE	'--	'--	false	'--	'--	'--	Blood Derived Normal	10	'--	released	'--	'--	'--	Not Reported	'--	'--	'--
TCGA-THCA	29c4319c-3ead-42b1-810d-418da8d515c4	TCGA-BJ-A3PT	2a378fac-3b51-446e-8526-6b989c1934c3	TCGA-BJ-A3PT-01Z	'--	'--	'--	'--	'--	'--	0	'--	'--	'--	'--	'--	'--	'--	TRUE	'--	'--	No	'--	'--	FFPE	Primary Tumor	1	'--	released	'--	'--	'--	Not Reported	'--	'--	'--
TCGA-THCA	29c4319c-3ead-42b1-810d-418da8d515c4	TCGA-BJ-A3PT	8c112a5f-ae83-4b13-8e00-802382729344	TCGA-BJ-A3PT-01A	'--	'--	'--	'--	'--	255	'--	'--	'--	'--	'--	'--	210.0	'--	FALSE	'--	'--	true	'--	25BA0C46-3556-494D-9BAA-FE4B153AF812	'--	Primary Tumor	1	'--	released	'--	'--	'--	Not Reported	'--	'--	'--
TCGA-THCA	29c4319c-3ead-42b1-810d-418da8d515c4	TCGA-BJ-A3PT	ff8056d1-c634-4b2f-8454-767c32568f1e	TCGA-BJ-A3PT-10A	'--	'--	'--	'--	'--	255	'--	'--	'--	'--	'--	'--	'--	'--	FALSE	'--	'--	false	'--	'--	'--	Blood Derived Normal	10	'--	released	'--	'--	'--	Not Reported	'--	'--	'--
TCGA-THCA	ef306507-f426-499e-8a1f-3401a522fb6b	TCGA-EM-A22I	e159fdd2-52ed-47de-a1c1-d801d70bd844	TCGA-EM-A22I-01Z	'--	'--	'--	'--	'--	'--	0	'--	'--	'--	'--	'--	'--	'--	TRUE	'--	'--	No	'--	'--	FFPE	Primary Tumor	1	'--	released	'--	'--	'--	Not Reported	'--	'--	'--
TCGA-THCA	ef306507-f426-499e-8a1f-3401a522fb6b	TCGA-EM-A22I	d5fa6434-5bb5-4114-8d95-3c252e479f64	TCGA-EM-A22I-01A	'--	'--	'--	'--	'--	77	'--	'--	'--	'--	'--	'--	130.0	'--	FALSE	'--	'--	false	'--	5403706A-C20F-4EB1-9AAF-DDE37DF704C2	'--	Primary Tumor	1	'--	released	'--	'--	'--	Not Reported	'--	'--	'--
TCGA-THCA	ef306507-f426-499e-8a1f-3401a522fb6b	TCGA-EM-A22I	88b03c15-5608-4f61-a78b-712accd4a505	TCGA-EM-A22I-10A	'--	'--	'--	'--	'--	161	'--	'--	'--	'--	'--	'--	'--	'--	FALSE	'--	'--	false	'--	'--	'--	Blood Derived Normal	10	'--	released	'--	'--	'--	Not Reported	'--	'--	'--
TCGA-THCA	3b3c99ab-5336-4433-b682-e1a590221611	TCGA-DJ-A13X	c2aad892-4825-4765-b865-d5fcc8f327a2	TCGA-DJ-A13X-01Z	'--	'--	'--	'--	'--	'--	0	'--	'--	'--	'--	'--	'--	'--	TRUE	'--	'--	No	'--	'--	FFPE	Primary Tumor	1	'--	released	'--	'--	'--	Not Reported	'--	'--	'--
TCGA-THCA	3b3c99ab-5336-4433-b682-e1a590221611	TCGA-DJ-A13X	f42843aa-6ad0-4fbb-ba27-1d821e9c9d17	TCGA-DJ-A13X-10A	'--	'--	'--	'--	'--	126	'--	'--	'--	'--	'--	'--	'--	'--	FALSE	'--	'--	false	'--	'--	'--	Blood Derived Normal	10	'--	released	'--	'--	'--	Not Reported	'--	'--	'--
TCGA-THCA	3b3c99ab-5336-4433-b682-e1a590221611	TCGA-DJ-A13X	ac52bed3-fdd6-4281-89de-d2f125ba038e	TCGA-DJ-A13X-01A	'--	'--	'--	'--	'--	126	'--	'--	'--	'--	'--	'--	890.0	'--	FALSE	'--	'--	true	'--	FA8ABF27-AF99-41FD-85EB-49F2975C0E1B	'--	Primary Tumor	1	'--	released	'--	'--	'--	Not Reported	'--	'--	'--
TCGA-THCA	4bd61e82-5168-4222-a8c8-5124ab8fdd44	TCGA-KS-A41L	f9f2db6f-7b78-441a-98bf-fe9fd6bbcd97	TCGA-KS-A41L-01A	'--	'--	'--	'--	'--	2800	'--	'--	'--	'--	'--	'--	50.0	'--	FALSE	'--	'--	false	'--	982CB386-A34A-4610-B9A8-9A6A43F84D87	'--	Primary Tumor	1	'--	released	'--	'--	'--	Not Reported	'--	'--	'--
TCGA-THCA	4bd61e82-5168-4222-a8c8-5124ab8fdd44	TCGA-KS-A41L	3d74cd4d-0cc0-4977-b3d5-1dc83a5f7bbb	TCGA-KS-A41L-11A	'--	'--	'--	'--	'--	2800	'--	'--	'--	'--	'--	'--	50.0	'--	FALSE	'--	'--	false	'--	'--	'--	Solid Tissue Normal	11	'--	released	'--	'--	'--	Not Reported	'--	'--	'--
TCGA-THCA	4bd61e82-5168-4222-a8c8-5124ab8fdd44	TCGA-KS-A41L	812c2a57-a805-47ed-ab59-7c4c2709f62a	TCGA-KS-A41L-01Z	'--	'--	'--	'--	'--	'--	0	'--	'--	'--	'--	'--	'--	'--	TRUE	'--	'--	No	'--	'--	FFPE	Primary Tumor	1	'--	released	'--	'--	'--	Not Reported	'--	'--	'--
TCGA-THCA	ab8c9101-adeb-4c43-a8bb-b089ebd711f6	TCGA-BJ-A0ZE	abe80c37-f3cb-4a56-9c18-9080057aa81d	TCGA-BJ-A0ZE-10A	'--	'--	'--	'--	'--	96	'--	'--	'--	'--	'--	'--	'--	'--	FALSE	'--	'--	false	'--	'--	'--	Blood Derived Normal	10	'--	released	'--	'--	'--	Not Reported	'--	'--	'--
TCGA-THCA	ab8c9101-adeb-4c43-a8bb-b089ebd711f6	TCGA-BJ-A0ZE	695c5627-f442-4a86-9702-ef35defd8c8c	TCGA-BJ-A0ZE-01A	'--	'--	'--	'--	'--	96	'--	'--	'--	'--	'--	'--	320.0	'--	FALSE	'--	'--	true	'--	A680FCC2-F8CD-445A-8523-C0A6857D52C5	'--	Primary Tumor	1	'--	released	'--	'--	'--	Not Reported	'--	'--	'--
TCGA-THCA	ab8c9101-adeb-4c43-a8bb-b089ebd711f6	TCGA-BJ-A0ZE	34db3e16-154a-4030-8a9f-1419c9ab50fc	TCGA-BJ-A0ZE-01Z	'--	'--	'--	'--	'--	'--	0	'--	'--	'--	'--	'--	'--	'--	TRUE	'--	'--	No	'--	'--	FFPE	Primary Tumor	1	'--	released	'--	'--	'--	Not Reported	'--	'--	'--
TCGA-THCA	dc659941-8d12-4095-8d8a-1769878c363c	TCGA-DJ-A3VD	3af385e0-c9c8-4965-9120-146810fa280f	TCGA-DJ-A3VD-10A	'--	'--	'--	'--	'--	275	'--	'--	'--	'--	'--	'--	'--	'--	FALSE	'--	'--	false	'--	'--	'--	Blood Derived Normal	10	'--	released	'--	'--	'--	Not Reported	'--	'--	'--
TCGA-THCA	dc659941-8d12-4095-8d8a-1769878c363c	TCGA-DJ-A3VD	fc559d77-47b2-4166-90e1-599c451c282f	TCGA-DJ-A3VD-01A	'--	'--	'--	'--	'--	275	'--	'--	'--	'--	'--	'--	50.0	'--	FALSE	'--	'--	true	'--	B31A3265-AA77-431E-9886-403254D1B8A3	'--	Primary Tumor	1	'--	released	'--	'--	'--	Not Reported	'--	'--	'--
TCGA-THCA	dc659941-8d12-4095-8d8a-1769878c363c	TCGA-DJ-A3VD	13b0e937-76bd-4819-9d49-fbeaaa19c77d	TCGA-DJ-A3VD-01Z	'--	'--	'--	'--	'--	'--	0	'--	'--	'--	'--	'--	'--	'--	TRUE	'--	'--	No	'--	'--	FFPE	Primary Tumor	1	'--	released	'--	'--	'--	Not Reported	'--	'--	'--
TCGA-THCA	0c50a2c2-1d4c-45ca-9127-f96d4db18daf	TCGA-EM-A3AL	34320dba-8834-47bb-b42e-c153b954711e	TCGA-EM-A3AL-10A	'--	'--	'--	'--	'--	231	'--	'--	'--	'--	'--	'--	'--	'--	FALSE	'--	'--	false	'--	'--	'--	Blood Derived Normal	10	'--	released	'--	'--	'--	Not Reported	'--	'--	'--
TCGA-THCA	0c50a2c2-1d4c-45ca-9127-f96d4db18daf	TCGA-EM-A3AL	593736e0-1bed-4eaf-bac9-e90620554f1d	TCGA-EM-A3AL-01A	'--	'--	'--	'--	'--	174	'--	'--	'--	'--	'--	'--	140.0	'--	FALSE	'--	'--	false	'--	31921221-0B77-47EE-B989-3551A7C71FFB	'--	Primary Tumor	1	'--	released	'--	'--	'--	Not Reported	'--	'--	'--
TCGA-THCA	0c50a2c2-1d4c-45ca-9127-f96d4db18daf	TCGA-EM-A3AL	475869e8-6287-4863-b361-da6aa811465f	TCGA-EM-A3AL-01Z	'--	'--	'--	'--	'--	'--	0	'--	'--	'--	'--	'--	'--	'--	TRUE	'--	'--	No	'--	'--	FFPE	Primary Tumor	1	'--	released	'--	'--	'--	Not Reported	'--	'--	'--
TCGA-THCA	97384352-0e80-42c2-8a8b-7bdbda2b58ee	TCGA-DJ-A4UW	39c430c7-0308-4d07-b41b-408f4aa0592d	TCGA-DJ-A4UW-10A	'--	'--	'--	'--	'--	232	'--	'--	'--	'--	'--	'--	'--	'--	FALSE	'--	'--	false	'--	'--	'--	Blood Derived Normal	10	'--	released	'--	'--	'--	Not Reported	'--	'--	'--
TCGA-THCA	97384352-0e80-42c2-8a8b-7bdbda2b58ee	TCGA-DJ-A4UW	a24d6612-61f6-4e38-9e65-7521fc562256	TCGA-DJ-A4UW-01Z	'--	'--	'--	'--	'--	'--	0	'--	'--	'--	'--	'--	'--	'--	TRUE	'--	'--	No	'--	'--	FFPE	Primary Tumor	1	'--	released	'--	'--	'--	Not Reported	'--	'--	'--
TCGA-THCA	97384352-0e80-42c2-8a8b-7bdbda2b58ee	TCGA-DJ-A4UW	1e6edfae-4ca3-4f1d-9072-c14c6e3f9dfc	TCGA-DJ-A4UW-01A	'--	'--	'--	'--	'--	232	'--	'--	'--	'--	'--	'--	70.0	'--	FALSE	'--	'--	true	'--	E4B86C23-3BD2-4F8C-824E-357E98560FBA	'--	Primary Tumor	1	'--	released	'--	'--	'--	Not Reported	'--	'--	'--
TCGA-THCA	befa0ef5-d621-4866-904d-13341ea54aa1	TCGA-BJ-A3EZ	70d54d09-103c-4e91-bd3d-82d32d43c2f0	TCGA-BJ-A3EZ-01Z	'--	'--	'--	'--	'--	'--	0	'--	'--	'--	'--	'--	'--	'--	TRUE	'--	'--	No	'--	'--	FFPE	Primary Tumor	1	'--	released	'--	'--	'--	Not Reported	'--	'--	'--
TCGA-THCA	befa0ef5-d621-4866-904d-13341ea54aa1	TCGA-BJ-A3EZ	91be579c-c54b-4ac8-a4c2-33d0b2f8fac9	TCGA-BJ-A3EZ-10A	'--	'--	'--	'--	'--	91	'--	'--	'--	'--	'--	'--	'--	'--	FALSE	'--	'--	false	'--	'--	'--	Blood Derived Normal	10	'--	released	'--	'--	'--	Not Reported	'--	'--	'--
TCGA-THCA	befa0ef5-d621-4866-904d-13341ea54aa1	TCGA-BJ-A3EZ	826410a8-74c4-4dbb-bdf3-efacf056cab9	TCGA-BJ-A3EZ-01A	'--	'--	'--	'--	'--	91	'--	'--	'--	'--	'--	'--	90.0	'--	FALSE	'--	'--	true	'--	32D8F45C-7FFE-4F34-8D8E-1A2B35B09EF7	'--	Primary Tumor	1	'--	released	'--	'--	'--	Not Reported	'--	'--	'--
TCGA-THCA	a175a9a5-ab86-4c68-9814-c30cfcc52662	TCGA-DJ-A2PX	a874bcf6-0c47-4b49-b211-c7fef8435752	TCGA-DJ-A2PX-01Z	'--	'--	'--	'--	'--	'--	0	'--	'--	'--	'--	'--	'--	'--	TRUE	'--	'--	No	'--	'--	FFPE	Primary Tumor	1	'--	released	'--	'--	'--	Not Reported	'--	'--	'--
TCGA-THCA	a175a9a5-ab86-4c68-9814-c30cfcc52662	TCGA-DJ-A2PX	b456b7ee-0ce2-48c5-803e-98b5c193529a	TCGA-DJ-A2PX-10A	'--	'--	'--	'--	'--	117	'--	'--	'--	'--	'--	'--	'--	'--	FALSE	'--	'--	false	'--	'--	'--	Blood Derived Normal	10	'--	released	'--	'--	'--	Not Reported	'--	'--	'--
TCGA-THCA	a175a9a5-ab86-4c68-9814-c30cfcc52662	TCGA-DJ-A2PX	36b3081a-bb1a-4ce8-928d-aee302f5bacf	TCGA-DJ-A2PX-01A	'--	'--	'--	'--	'--	117	'--	'--	'--	'--	'--	'--	60.0	'--	FALSE	'--	'--	true	'--	763C06CF-4DC5-4A5A-B698-224A9E5693A2	'--	Primary Tumor	1	'--	released	'--	'--	'--	Not Reported	'--	'--	'--
TCGA-THCA	a1227ffa-2733-4a43-ba82-834755453870	TCGA-CE-A13K	a89e5a43-6daf-4842-a9a7-8eaef7450248	TCGA-CE-A13K-01Z	'--	'--	'--	'--	'--	'--	0	'--	'--	'--	'--	'--	'--	'--	TRUE	'--	'--	No	'--	'--	FFPE	Primary Tumor	1	'--	released	'--	'--	'--	Not Reported	'--	'--	'--
TCGA-THCA	a1227ffa-2733-4a43-ba82-834755453870	TCGA-CE-A13K	daf2a444-ab89-48d4-9da7-888ac3099ab7	TCGA-CE-A13K-01A	'--	'--	'--	'--	'--	75	'--	'--	'--	'--	'--	'--	620.0	'--	FALSE	'--	'--	true	'--	21076911-FE79-445E-BE30-A0DAF4D872C6	'--	Primary Tumor	1	'--	released	'--	'--	'--	Not Reported	'--	'--	'--
TCGA-THCA	a1227ffa-2733-4a43-ba82-834755453870	TCGA-CE-A13K	e78c8bdf-ce47-4e6d-9839-c48c7a481a10	TCGA-CE-A13K-10A	'--	'--	'--	'--	'--	75	'--	'--	'--	'--	'--	'--	'--	'--	FALSE	'--	'--	false	'--	'--	'--	Blood Derived Normal	10	'--	released	'--	'--	'--	Not Reported	'--	'--	'--
TCGA-THCA	e071c940-60fa-4c73-bb65-1ad670021854	TCGA-DJ-A3VE	6584be0c-c01a-466b-9038-2a8e154c18e3	TCGA-DJ-A3VE-10A	'--	'--	'--	'--	'--	100	'--	'--	'--	'--	'--	'--	'--	'--	FALSE	'--	'--	false	'--	'--	'--	Blood Derived Normal	10	'--	released	'--	'--	'--	Not Reported	'--	'--	'--
TCGA-THCA	e071c940-60fa-4c73-bb65-1ad670021854	TCGA-DJ-A3VE	fa0597c7-487c-44ca-9236-93386aef7252	TCGA-DJ-A3VE-01Z	'--	'--	'--	'--	'--	'--	0	'--	'--	'--	'--	'--	'--	'--	TRUE	'--	'--	No	'--	'--	FFPE	Primary Tumor	1	'--	released	'--	'--	'--	Not Reported	'--	'--	'--
TCGA-THCA	e071c940-60fa-4c73-bb65-1ad670021854	TCGA-DJ-A3VE	644177c4-983d-4eb7-8328-209695f47744	TCGA-DJ-A3VE-01A	'--	'--	'--	'--	'--	100	'--	'--	'--	'--	'--	'--	250.0	'--	FALSE	'--	'--	true	'--	FC2448D9-4FD8-4500-9B0C-293CAC511E17	'--	Primary Tumor	1	'--	released	'--	'--	'--	Not Reported	'--	'--	'--
TCGA-THCA	4fa53eb7-1fdb-4fe5-b5ad-f3d8069b3eb8	TCGA-ET-A2MZ	a7faf32b-9758-49ff-a5c5-5c3955558296	TCGA-ET-A2MZ-01Z	'--	'--	'--	'--	'--	'--	0	'--	'--	'--	'--	'--	'--	'--	TRUE	'--	'--	No	'--	'--	FFPE	Primary Tumor	1	'--	released	'--	'--	'--	Not Reported	'--	'--	'--
TCGA-THCA	4fa53eb7-1fdb-4fe5-b5ad-f3d8069b3eb8	TCGA-ET-A2MZ	9775cd65-2203-44a7-8574-19667d2b9210	TCGA-ET-A2MZ-10A	'--	'--	'--	'--	'--	280	'--	'--	'--	'--	'--	'--	'--	'--	FALSE	'--	'--	false	'--	'--	'--	Blood Derived Normal	10	'--	released	'--	'--	'--	Not Reported	'--	'--	'--
TCGA-THCA	4fa53eb7-1fdb-4fe5-b5ad-f3d8069b3eb8	TCGA-ET-A2MZ	0a16fe83-515b-40bd-a335-352b794c35f3	TCGA-ET-A2MZ-01A	'--	'--	'--	'--	'--	280	'--	'--	'--	'--	'--	'--	100.0	'--	FALSE	'--	'--	true	'--	DC5C5C67-07E0-46A6-8CB8-1355237BE056	'--	Primary Tumor	1	'--	released	'--	'--	'--	Not Reported	'--	'--	'--
TCGA-THCA	2106f0cd-cb3c-4568-bdc5-197ee11f2337	TCGA-EL-A3D6	9bd1fde8-2000-4ad1-a4fa-d370379deac6	TCGA-EL-A3D6-01A	'--	'--	'--	'--	'--	4447	'--	'--	'--	'--	'--	'--	210.0	'--	FALSE	'--	'--	true	'--	A4EA7225-4DF5-4917-A931-B41DF5F7FA31	'--	Primary Tumor	1	'--	released	'--	'--	'--	Not Reported	'--	'--	'--
TCGA-THCA	2106f0cd-cb3c-4568-bdc5-197ee11f2337	TCGA-EL-A3D6	91ac7322-0678-47d3-a9e8-ad1028eaa53c	TCGA-EL-A3D6-01Z	'--	'--	'--	'--	'--	'--	0	'--	'--	'--	'--	'--	'--	'--	TRUE	'--	'--	No	'--	'--	FFPE	Primary Tumor	1	'--	released	'--	'--	'--	Not Reported	'--	'--	'--
TCGA-THCA	2106f0cd-cb3c-4568-bdc5-197ee11f2337	TCGA-EL-A3D6	4c458e9d-b3a6-46aa-978c-849720ff41c0	TCGA-EL-A3D6-10A	'--	'--	'--	'--	'--	4447	'--	'--	'--	'--	'--	'--	'--	'--	FALSE	'--	'--	false	'--	'--	'--	Blood Derived Normal	10	'--	released	'--	'--	'--	Not Reported	'--	'--	'--
TCGA-THCA	aabc7724-71c8-4c1b-a54b-22e88dde148f	TCGA-EM-A22L	f90925ea-8894-4c74-b48b-fb60e154bc19	TCGA-EM-A22L-01A	'--	'--	'--	'--	'--	72	'--	'--	'--	'--	'--	'--	110.0	'--	FALSE	'--	'--	false	'--	D48FB953-758B-4515-B244-09DCACD29441	'--	Primary Tumor	1	'--	released	'--	'--	'--	Not Reported	'--	'--	'--
TCGA-THCA	aabc7724-71c8-4c1b-a54b-22e88dde148f	TCGA-EM-A22L	677e7dd5-4be7-4b4b-8c89-1cf8156e855a	TCGA-EM-A22L-01Z	'--	'--	'--	'--	'--	'--	0	'--	'--	'--	'--	'--	'--	'--	TRUE	'--	'--	No	'--	'--	FFPE	Primary Tumor	1	'--	released	'--	'--	'--	Not Reported	'--	'--	'--
TCGA-THCA	aabc7724-71c8-4c1b-a54b-22e88dde148f	TCGA-EM-A22L	a48ae263-cee1-4ea8-aa2e-7479ae8bac4e	TCGA-EM-A22L-10A	'--	'--	'--	'--	'--	156	'--	'--	'--	'--	'--	'--	'--	'--	FALSE	'--	'--	false	'--	'--	'--	Blood Derived Normal	10	'--	released	'--	'--	'--	Not Reported	'--	'--	'--
TCGA-THCA	4d30606f-3ab6-4ef0-9991-8897cdb9960b	TCGA-KS-A4IC	ecd13169-37a8-4ccf-af96-3295de3d7bbb	TCGA-KS-A4IC-11A	'--	'--	'--	'--	'--	490	'--	'--	'--	'--	'--	'--	100.0	'--	FALSE	'--	'--	false	'--	'--	'--	Solid Tissue Normal	11	'--	released	'--	'--	'--	Not Reported	'--	'--	'--
TCGA-THCA	4d30606f-3ab6-4ef0-9991-8897cdb9960b	TCGA-KS-A4IC	88ad3801-2464-4327-a72e-291794fda877	TCGA-KS-A4IC-01A	'--	'--	'--	'--	'--	490	'--	'--	'--	'--	'--	'--	40.0	'--	FALSE	'--	'--	false	'--	64802136-E632-4C35-9CE6-C1CC1F7E6022	'--	Primary Tumor	1	'--	released	'--	'--	'--	Not Reported	'--	'--	'--
TCGA-THCA	4d30606f-3ab6-4ef0-9991-8897cdb9960b	TCGA-KS-A4IC	ae122e7d-9889-43b8-89fa-6ad9f23d18f2	TCGA-KS-A4IC-01Z	'--	'--	'--	'--	'--	'--	0	'--	'--	'--	'--	'--	'--	'--	TRUE	'--	'--	No	'--	'--	FFPE	Primary Tumor	1	'--	released	'--	'--	'--	Not Reported	'--	'--	'--
TCGA-THCA	d84312e8-999d-49ad-b0aa-e48e87efc462	TCGA-ET-A3BT	4ccd9e8b-8a6d-49f2-8a2c-828a75b0f3d4	TCGA-ET-A3BT-10A	'--	'--	'--	'--	'--	1396	'--	'--	'--	'--	'--	'--	'--	'--	FALSE	'--	'--	false	'--	'--	'--	Blood Derived Normal	10	'--	released	'--	'--	'--	Not Reported	'--	'--	'--
TCGA-THCA	d84312e8-999d-49ad-b0aa-e48e87efc462	TCGA-ET-A3BT	529071a1-30b8-459e-876c-8542cfbd95ee	TCGA-ET-A3BT-01A	'--	'--	'--	'--	'--	1396	'--	'--	'--	'--	'--	'--	90.0	'--	FALSE	'--	'--	true	'--	66200460-5621-4F64-A7D2-ECDF3793D63C	'--	Primary Tumor	1	'--	released	'--	'--	'--	Not Reported	'--	'--	'--
TCGA-THCA	d84312e8-999d-49ad-b0aa-e48e87efc462	TCGA-ET-A3BT	cd82c5db-4b13-4deb-81d4-68081229e0a6	TCGA-ET-A3BT-01Z	'--	'--	'--	'--	'--	'--	0	'--	'--	'--	'--	'--	'--	'--	TRUE	'--	'--	No	'--	'--	FFPE	Primary Tumor	1	'--	released	'--	'--	'--	Not Reported	'--	'--	'--
TCGA-THCA	da575651-8a69-4d08-aa0f-4a1891b0b44f	TCGA-DJ-A4V2	1efc4442-8efc-47e7-8616-756208590526	TCGA-DJ-A4V2-01Z	'--	'--	'--	'--	'--	'--	0	'--	'--	'--	'--	'--	'--	'--	TRUE	'--	'--	No	'--	'--	FFPE	Primary Tumor	1	'--	released	'--	'--	'--	Not Reported	'--	'--	'--
TCGA-THCA	da575651-8a69-4d08-aa0f-4a1891b0b44f	TCGA-DJ-A4V2	7844d67d-d104-4cbd-88b5-2a86c9bafce6	TCGA-DJ-A4V2-01A	'--	'--	'--	'--	'--	283	'--	'--	'--	'--	'--	'--	230.0	'--	FALSE	'--	'--	true	'--	02145821-EB2F-4F21-98C7-379353CF81E6	'--	Primary Tumor	1	'--	released	'--	'--	'--	Not Reported	'--	'--	'--
TCGA-THCA	da575651-8a69-4d08-aa0f-4a1891b0b44f	TCGA-DJ-A4V2	f326667c-9565-4a13-af38-0fc85c97f437	TCGA-DJ-A4V2-10A	'--	'--	'--	'--	'--	283	'--	'--	'--	'--	'--	'--	'--	'--	FALSE	'--	'--	false	'--	'--	'--	Blood Derived Normal	10	'--	released	'--	'--	'--	Not Reported	'--	'--	'--
TCGA-THCA	a061976d-ba2c-4a18-a51e-952f198eb4d5	TCGA-ET-A3DR	2ceca350-0d77-47d5-9d5a-12c3b71704ef	TCGA-ET-A3DR-01A	'--	'--	'--	'--	'--	1218	'--	'--	'--	'--	'--	'--	30.0	'--	FALSE	'--	'--	true	'--	7EABB2C4-F2D3-467D-B725-4D9F61B6F6FF	'--	Primary Tumor	1	'--	released	'--	'--	'--	Not Reported	'--	'--	'--
TCGA-THCA	a061976d-ba2c-4a18-a51e-952f198eb4d5	TCGA-ET-A3DR	b1aa1378-5dbb-4d4a-ac06-3a0e207033f6	TCGA-ET-A3DR-01Z	'--	'--	'--	'--	'--	'--	0	'--	'--	'--	'--	'--	'--	'--	TRUE	'--	'--	No	'--	'--	FFPE	Primary Tumor	1	'--	released	'--	'--	'--	Not Reported	'--	'--	'--
TCGA-THCA	a061976d-ba2c-4a18-a51e-952f198eb4d5	TCGA-ET-A3DR	2d40411b-e90d-4a59-a17a-cb8a9a6ee871	TCGA-ET-A3DR-10A	'--	'--	'--	'--	'--	1218	'--	'--	'--	'--	'--	'--	'--	'--	FALSE	'--	'--	false	'--	'--	'--	Blood Derived Normal	10	'--	released	'--	'--	'--	Not Reported	'--	'--	'--
TCGA-THCA	2acb6f29-06d3-48d4-8553-a9f5839afe22	TCGA-EM-A2CM	f2c0527f-0227-41d4-867e-a9fb91cc8550	TCGA-EM-A2CM-01Z	'--	'--	'--	'--	'--	'--	0	'--	'--	'--	'--	'--	'--	'--	TRUE	'--	'--	No	'--	'--	FFPE	Primary Tumor	1	'--	released	'--	'--	'--	Not Reported	'--	'--	'--
TCGA-THCA	2acb6f29-06d3-48d4-8553-a9f5839afe22	TCGA-EM-A2CM	b1d8aa5f-c397-47e5-991c-d3e110524546	TCGA-EM-A2CM-01A	'--	'--	'--	'--	'--	176	'--	'--	'--	'--	'--	'--	100.0	'--	FALSE	'--	'--	false	'--	26C8884E-4AFB-468D-A974-BE406BD2845F	'--	Primary Tumor	1	'--	released	'--	'--	'--	Not Reported	'--	'--	'--
TCGA-THCA	2acb6f29-06d3-48d4-8553-a9f5839afe22	TCGA-EM-A2CM	90800237-6829-4572-a034-20c9bb589e58	TCGA-EM-A2CM-10A	'--	'--	'--	'--	'--	266	'--	'--	'--	'--	'--	'--	'--	'--	FALSE	'--	'--	false	'--	'--	'--	Blood Derived Normal	10	'--	released	'--	'--	'--	Not Reported	'--	'--	'--
TCGA-THCA	97b5017c-2066-4472-ab3f-31cfe64a6762	TCGA-EM-A3O8	7f540311-430c-46b2-98c8-f314b27ecb0e	TCGA-EM-A3O8-01A	'--	'--	'--	'--	'--	100	'--	'--	'--	'--	'--	'--	80.0	'--	FALSE	'--	'--	false	'--	CE03F0A7-D71D-4B96-9401-2157AC622BFE	'--	Primary Tumor	1	'--	released	'--	'--	'--	Not Reported	'--	'--	'--
TCGA-THCA	97b5017c-2066-4472-ab3f-31cfe64a6762	TCGA-EM-A3O8	73d5092a-29bb-45fe-8e0e-f31beeb39f22	TCGA-EM-A3O8-01Z	'--	'--	'--	'--	'--	'--	0	'--	'--	'--	'--	'--	'--	'--	TRUE	'--	'--	No	'--	'--	FFPE	Primary Tumor	1	'--	released	'--	'--	'--	Not Reported	'--	'--	'--
TCGA-THCA	97b5017c-2066-4472-ab3f-31cfe64a6762	TCGA-EM-A3O8	63ef63db-cb13-405c-8742-e74764708cdd	TCGA-EM-A3O8-10A	'--	'--	'--	'--	'--	169	'--	'--	'--	'--	'--	'--	'--	'--	FALSE	'--	'--	false	'--	'--	'--	Blood Derived Normal	10	'--	released	'--	'--	'--	Not Reported	'--	'--	'--
TCGA-THCA	dc392a57-2028-4eca-8bf3-760ec99703ee	TCGA-EL-A4K7	aac778b9-d568-4d3c-b7e4-348c54b17e91	TCGA-EL-A4K7-11A	'--	'--	'--	'--	'--	1121	'--	'--	'--	'--	'--	'--	230.0	'--	FALSE	'--	'--	false	'--	'--	'--	Solid Tissue Normal	11	'--	released	'--	'--	'--	Not Reported	'--	'--	'--
TCGA-THCA	dc392a57-2028-4eca-8bf3-760ec99703ee	TCGA-EL-A4K7	27bc60c8-c2cb-4ddc-92f2-e5a437002b11	TCGA-EL-A4K7-01A	'--	'--	'--	'--	'--	1121	'--	'--	'--	'--	'--	'--	220.0	'--	FALSE	'--	'--	false	'--	74E7A957-CB8F-4D15-9EA7-40E1B7EC36FA	'--	Primary Tumor	1	'--	released	'--	'--	'--	Not Reported	'--	'--	'--
TCGA-THCA	dc392a57-2028-4eca-8bf3-760ec99703ee	TCGA-EL-A4K7	695613d3-05d8-4ad5-b60b-c8b17c6c3e76	TCGA-EL-A4K7-01Z	'--	'--	'--	'--	'--	'--	0	'--	'--	'--	'--	'--	'--	'--	TRUE	'--	'--	No	'--	'--	FFPE	Primary Tumor	1	'--	released	'--	'--	'--	Not Reported	'--	'--	'--
TCGA-THCA	63076bda-61a1-4403-a270-4130b5d003ee	TCGA-DJ-A2PV	4107aebe-afea-441f-837f-b5ccc1b7f210	TCGA-DJ-A2PV-10A	'--	'--	'--	'--	'--	202	'--	'--	'--	'--	'--	'--	'--	'--	FALSE	'--	'--	false	'--	'--	'--	Blood Derived Normal	10	'--	released	'--	'--	'--	Not Reported	'--	'--	'--
TCGA-THCA	63076bda-61a1-4403-a270-4130b5d003ee	TCGA-DJ-A2PV	23c40796-d257-4918-9abf-a363f146a724	TCGA-DJ-A2PV-01Z	'--	'--	'--	'--	'--	'--	0	'--	'--	'--	'--	'--	'--	'--	TRUE	'--	'--	No	'--	'--	FFPE	Primary Tumor	1	'--	released	'--	'--	'--	Not Reported	'--	'--	'--
TCGA-THCA	63076bda-61a1-4403-a270-4130b5d003ee	TCGA-DJ-A2PV	9a107cb1-d197-4f64-ba64-834a449a5812	TCGA-DJ-A2PV-01A	'--	'--	'--	'--	'--	202	'--	'--	'--	'--	'--	'--	150.0	'--	FALSE	'--	'--	true	'--	C1CBFF56-4A0E-4A36-AAA2-2A316C62E00E	'--	Primary Tumor	1	'--	released	'--	'--	'--	Not Reported	'--	'--	'--
TCGA-THCA	4c0b29e6-8530-43d5-8e8a-efb754e83ecd	TCGA-EL-A3CT	bed966d5-fdc0-4476-8ce7-29dcb852f613	TCGA-EL-A3CT-10A	'--	'--	'--	'--	'--	2639	'--	'--	'--	'--	'--	'--	'--	'--	FALSE	'--	'--	false	'--	'--	'--	Blood Derived Normal	10	'--	released	'--	'--	'--	Not Reported	'--	'--	'--
TCGA-THCA	4c0b29e6-8530-43d5-8e8a-efb754e83ecd	TCGA-EL-A3CT	26a8be9f-dd2f-474b-a06b-1e9558617a56	TCGA-EL-A3CT-01A	'--	'--	'--	'--	'--	2639	'--	'--	'--	'--	'--	'--	230.0	'--	FALSE	'--	'--	true	'--	981D4559-E404-470A-A25D-8B11296843ED	'--	Primary Tumor	1	'--	released	'--	'--	'--	Not Reported	'--	'--	'--
TCGA-THCA	4c0b29e6-8530-43d5-8e8a-efb754e83ecd	TCGA-EL-A3CT	a67247f6-0774-43ad-9241-b5f0fc5f35b1	TCGA-EL-A3CT-01Z	'--	'--	'--	'--	'--	'--	0	'--	'--	'--	'--	'--	'--	'--	TRUE	'--	'--	No	'--	'--	FFPE	Primary Tumor	1	'--	released	'--	'--	'--	Not Reported	'--	'--	'--
TCGA-THCA	dff3c4f1-9009-4111-9fc2-3834f8f7dbdd	TCGA-E8-A436	bc7aae85-f8e1-48c6-889e-95e922f2a1fb	TCGA-E8-A436-01Z	'--	'--	'--	'--	'--	'--	0	'--	'--	'--	'--	'--	'--	'--	TRUE	'--	'--	No	'--	'--	FFPE	Primary Tumor	1	'--	released	'--	'--	'--	Not Reported	'--	'--	'--
TCGA-THCA	dff3c4f1-9009-4111-9fc2-3834f8f7dbdd	TCGA-E8-A436	356c8750-7b09-4c71-9d5c-e66814e75b44	TCGA-E8-A436-10A	'--	'--	'--	'--	'--	114	'--	'--	'--	'--	'--	'--	'--	'--	FALSE	'--	'--	false	'--	'--	'--	Blood Derived Normal	10	'--	released	'--	'--	'--	Not Reported	'--	'--	'--
TCGA-THCA	dff3c4f1-9009-4111-9fc2-3834f8f7dbdd	TCGA-E8-A436	265746f6-d199-4a3f-b553-e22208c87aad	TCGA-E8-A436-01A	'--	'--	'--	'--	'--	114	'--	'--	'--	'--	'--	'--	900.0	'--	FALSE	'--	'--	true	'--	0DE23F0B-79FC-49FF-86FE-E715BAC24B3A	'--	Primary Tumor	1	'--	released	'--	'--	'--	Not Reported	'--	'--	'--
TCGA-THCA	87858089-1bad-4e5d-80ed-04f846da9ca4	TCGA-ET-A39N	b3cf7e11-9204-4201-bf32-1afe0233a85e	TCGA-ET-A39N-01A	'--	'--	'--	'--	'--	2478	'--	'--	'--	'--	'--	'--	100.0	'--	FALSE	'--	'--	true	'--	005A9931-5051-4739-AA85-86238410CEC4	'--	Primary Tumor	1	'--	released	'--	'--	'--	Not Reported	'--	'--	'--
TCGA-THCA	87858089-1bad-4e5d-80ed-04f846da9ca4	TCGA-ET-A39N	abbcb71b-3a45-455c-9fe7-9792099fb693	TCGA-ET-A39N-01Z	'--	'--	'--	'--	'--	'--	0	'--	'--	'--	'--	'--	'--	'--	TRUE	'--	'--	No	'--	'--	FFPE	Primary Tumor	1	'--	released	'--	'--	'--	Not Reported	'--	'--	'--
TCGA-THCA	87858089-1bad-4e5d-80ed-04f846da9ca4	TCGA-ET-A39N	1d7ae01c-5e94-49e5-b304-2fa7da81ebda	TCGA-ET-A39N-10A	'--	'--	'--	'--	'--	2478	'--	'--	'--	'--	'--	'--	'--	'--	FALSE	'--	'--	false	'--	'--	'--	Blood Derived Normal	10	'--	released	'--	'--	'--	Not Reported	'--	'--	'--
TCGA-THCA	e92bdb0d-969a-4d98-ada8-5dfec68119b5	TCGA-EM-A1CS	3929aafb-3850-4f1a-a883-ca904d6cbc69	TCGA-EM-A1CS-10A	'--	'--	'--	'--	'--	527	'--	'--	'--	'--	'--	'--	'--	'--	FALSE	'--	'--	false	'--	'--	'--	Blood Derived Normal	10	'--	released	'--	'--	'--	Not Reported	'--	'--	'--
TCGA-THCA	e92bdb0d-969a-4d98-ada8-5dfec68119b5	TCGA-EM-A1CS	c1daf740-06e2-4509-86be-5bfcc52b508a	TCGA-EM-A1CS-01A	'--	'--	'--	'--	'--	527	'--	'--	'--	'--	'--	'--	100.0	'--	FALSE	'--	'--	false	'--	225D9285-DFDA-426E-B1C5-5A557272B552	'--	Primary Tumor	1	'--	released	'--	'--	'--	Not Reported	'--	'--	'--
TCGA-THCA	e92bdb0d-969a-4d98-ada8-5dfec68119b5	TCGA-EM-A1CS	5cf53d78-707f-4a7a-8381-2f48ccae4428	TCGA-EM-A1CS-01Z	'--	'--	'--	'--	'--	'--	0	'--	'--	'--	'--	'--	'--	'--	TRUE	'--	'--	No	'--	'--	FFPE	Primary Tumor	1	'--	released	'--	'--	'--	Not Reported	'--	'--	'--
TCGA-THCA	e92bdb0d-969a-4d98-ada8-5dfec68119b5	TCGA-EM-A1CS	7c7a3dc2-b44d-448c-8bb8-c0cb0631b7a6	TCGA-EM-A1CS-11A	'--	'--	'--	'--	'--	527	'--	'--	'--	'--	'--	'--	160.0	'--	FALSE	'--	'--	false	'--	'--	'--	Solid Tissue Normal	11	'--	released	'--	'--	'--	Not Reported	'--	'--	'--
TCGA-THCA	980d1c65-b675-4568-9ce8-c0278686ae8d	TCGA-E8-A2EA	dc79e975-13a4-4ebd-a5fe-f6eb20cae943	TCGA-E8-A2EA-01A	'--	'--	'--	'--	'--	65	'--	'--	'--	'--	'--	'--	170.0	'--	FALSE	'--	'--	true	'--	ABFB455E-221D-420A-8B0B-0803BEBF8EBF	'--	Primary Tumor	1	'--	released	'--	'--	'--	Not Reported	'--	'--	'--
TCGA-THCA	980d1c65-b675-4568-9ce8-c0278686ae8d	TCGA-E8-A2EA	8c967e5b-0949-4740-82a5-b431fb3f0ec7	TCGA-E8-A2EA-01Z	'--	'--	'--	'--	'--	'--	0	'--	'--	'--	'--	'--	'--	'--	TRUE	'--	'--	No	'--	'--	FFPE	Primary Tumor	1	'--	released	'--	'--	'--	Not Reported	'--	'--	'--
TCGA-THCA	980d1c65-b675-4568-9ce8-c0278686ae8d	TCGA-E8-A2EA	a3f6c66a-36aa-4bed-923c-e28a3294442f	TCGA-E8-A2EA-10A	'--	'--	'--	'--	'--	65	'--	'--	'--	'--	'--	'--	'--	'--	FALSE	'--	'--	false	'--	'--	'--	Blood Derived Normal	10	'--	released	'--	'--	'--	Not Reported	'--	'--	'--
TCGA-THCA	44c2da7c-6975-4d09-b65c-4b30afd019bb	TCGA-FY-A40N	9d1ed84d-e50f-4e1b-99e1-dbbc2c7f79ee	TCGA-FY-A40N-10A	'--	'--	'--	'--	'--	55	'--	'--	'--	'--	'--	'--	'--	'--	FALSE	'--	'--	false	'--	'--	'--	Blood Derived Normal	10	'--	released	'--	'--	'--	Not Reported	'--	'--	'--
TCGA-THCA	44c2da7c-6975-4d09-b65c-4b30afd019bb	TCGA-FY-A40N	c8bce524-3577-4bac-a2c7-6256d0a5f882	TCGA-FY-A40N-01Z	'--	'--	'--	'--	'--	'--	0	'--	'--	'--	'--	'--	'--	'--	TRUE	'--	'--	No	'--	'--	FFPE	Primary Tumor	1	'--	released	'--	'--	'--	Not Reported	'--	'--	'--
TCGA-THCA	44c2da7c-6975-4d09-b65c-4b30afd019bb	TCGA-FY-A40N	dc7a88be-6521-4457-a2ca-3c71701e382e	TCGA-FY-A40N-01A	'--	'--	'--	'--	'--	55	'--	'--	'--	'--	'--	'--	80.0	'--	FALSE	'--	'--	false	'--	A3902FF5-8B0C-4239-BE35-F9832C38A8FD	'--	Primary Tumor	1	'--	released	'--	'--	'--	Not Reported	'--	'--	'--
TCGA-THCA	8beee000-ecab-4a49-9c9d-bb8e677ae199	TCGA-BJ-A0ZF	62fb7f1b-277e-4d51-8bb9-317604b7e93e	TCGA-BJ-A0ZF-01Z	'--	'--	'--	'--	'--	'--	0	'--	'--	'--	'--	'--	'--	'--	TRUE	'--	'--	No	'--	'--	FFPE	Primary Tumor	1	'--	released	'--	'--	'--	Not Reported	'--	'--	'--
TCGA-THCA	8beee000-ecab-4a49-9c9d-bb8e677ae199	TCGA-BJ-A0ZF	83a66a9d-916a-44e8-a7e6-a1385db504db	TCGA-BJ-A0ZF-01A	'--	'--	'--	'--	'--	118	'--	'--	'--	'--	'--	'--	270.0	'--	FALSE	'--	'--	true	'--	A9CCA0D6-C4EE-475E-8932-C99F5619D6FE	'--	Primary Tumor	1	'--	released	'--	'--	'--	Not Reported	'--	'--	'--
TCGA-THCA	8beee000-ecab-4a49-9c9d-bb8e677ae199	TCGA-BJ-A0ZF	2a0fc5cd-c936-44e4-852a-8c2797cb8729	TCGA-BJ-A0ZF-10A	'--	'--	'--	'--	'--	118	'--	'--	'--	'--	'--	'--	'--	'--	FALSE	'--	'--	false	'--	'--	'--	Blood Derived Normal	10	'--	released	'--	'--	'--	Not Reported	'--	'--	'--
TCGA-THCA	8950691c-600f-4a90-adf6-42a8f129aa3e	TCGA-FK-A3SB	82240992-3004-4a02-9aaa-fd16d28ca9fa	TCGA-FK-A3SB-01Z	'--	'--	'--	'--	'--	'--	0	'--	'--	'--	'--	'--	'--	'--	TRUE	'--	'--	No	'--	'--	FFPE	Primary Tumor	1	'--	released	'--	'--	'--	Not Reported	'--	'--	'--
TCGA-THCA	8950691c-600f-4a90-adf6-42a8f129aa3e	TCGA-FK-A3SB	f3d5aaa2-0e00-4842-aaeb-ed274866dfc2	TCGA-FK-A3SB-10A	'--	'--	'--	'--	'--	1344	'--	'--	'--	'--	'--	'--	'--	'--	FALSE	'--	'--	false	'--	'--	'--	Blood Derived Normal	10	'--	released	'--	'--	'--	Not Reported	'--	'--	'--
TCGA-THCA	8950691c-600f-4a90-adf6-42a8f129aa3e	TCGA-FK-A3SB	8859762a-5e78-4b31-b975-030a5cdde4ee	TCGA-FK-A3SB-01A	'--	'--	'--	'--	'--	1344	'--	'--	'--	'--	'--	'--	40.0	'--	FALSE	'--	'--	true	'--	E4786207-1ECD-48F6-BDC0-C4C27209D926	'--	Primary Tumor	1	'--	released	'--	'--	'--	Not Reported	'--	'--	'--
TCGA-THCA	fe28f76e-7ead-4d29-8c53-a576ae6021f7	TCGA-EM-A3SU	3b02edc2-a41b-4ceb-9ef5-5a2a0a251e11	TCGA-EM-A3SU-01A	'--	'--	'--	'--	'--	204	'--	'--	'--	'--	'--	'--	110.0	'--	FALSE	'--	'--	false	'--	3D004E6D-7679-4DC6-8F3F-86319814218E	'--	Primary Tumor	1	'--	released	'--	'--	'--	Not Reported	'--	'--	'--
TCGA-THCA	fe28f76e-7ead-4d29-8c53-a576ae6021f7	TCGA-EM-A3SU	21a1ea40-7213-4fe5-9975-8e42e3088ff1	TCGA-EM-A3SU-06A	'--	'--	'--	'--	'--	204	'--	'--	'--	'--	'--	'--	80.0	'--	FALSE	'--	'--	false	'--	DCC20FCD-7349-4F33-BE64-09E871835446	'--	Metastatic	6	'--	released	'--	'--	'--	Not Reported	'--	'--	'--
TCGA-THCA	fe28f76e-7ead-4d29-8c53-a576ae6021f7	TCGA-EM-A3SU	d63b0ef4-414a-486d-ac9b-12fb2d260e27	TCGA-EM-A3SU-10A	'--	'--	'--	'--	'--	261	'--	'--	'--	'--	'--	'--	'--	'--	FALSE	'--	'--	false	'--	'--	'--	Blood Derived Normal	10	'--	released	'--	'--	'--	Not Reported	'--	'--	'--
TCGA-THCA	fe28f76e-7ead-4d29-8c53-a576ae6021f7	TCGA-EM-A3SU	de23190b-36a7-4ccc-bb99-0ed107962b8b	TCGA-EM-A3SU-01Z	'--	'--	'--	'--	'--	'--	0	'--	'--	'--	'--	'--	'--	'--	TRUE	'--	'--	No	'--	'--	FFPE	Primary Tumor	1	'--	released	'--	'--	'--	Not Reported	'--	'--	'--
TCGA-THCA	0dc361b5-e755-4131-8766-d2c1375336d8	TCGA-EM-A4FK	fd89b415-4f82-4b8e-9504-7cc0da3e6888	TCGA-EM-A4FK-01A	'--	'--	'--	'--	'--	281	'--	'--	'--	'--	'--	'--	70.0	'--	FALSE	'--	'--	false	'--	EF94D807-0D05-49D5-B5B3-A9731D861BF8	'--	Primary Tumor	1	'--	released	'--	'--	'--	Not Reported	'--	'--	'--
TCGA-THCA	0dc361b5-e755-4131-8766-d2c1375336d8	TCGA-EM-A4FK	3a231c6a-17c8-4fed-acd2-aa848a3b707c	TCGA-EM-A4FK-10A	'--	'--	'--	'--	'--	281	'--	'--	'--	'--	'--	'--	'--	'--	FALSE	'--	'--	false	'--	'--	'--	Blood Derived Normal	10	'--	released	'--	'--	'--	Not Reported	'--	'--	'--
TCGA-THCA	0dc361b5-e755-4131-8766-d2c1375336d8	TCGA-EM-A4FK	b712685d-52ba-4955-875c-54521b3930b7	TCGA-EM-A4FK-01Z	'--	'--	'--	'--	'--	'--	0	'--	'--	'--	'--	'--	'--	'--	TRUE	'--	'--	No	'--	'--	FFPE	Primary Tumor	1	'--	released	'--	'--	'--	Not Reported	'--	'--	'--
TCGA-THCA	63986dd0-63ba-4ee5-aa25-8ff2cbb762d3	TCGA-EL-A3D0	179172f9-9baa-47f2-9a55-d3db3b23f9ad	TCGA-EL-A3D0-01A	'--	'--	'--	'--	'--	3829	'--	'--	'--	'--	'--	'--	270.0	'--	FALSE	'--	'--	true	'--	F50CE124-91BB-43E3-83B1-DC64713DA2A9	'--	Primary Tumor	1	'--	released	'--	'--	'--	Not Reported	'--	'--	'--
TCGA-THCA	63986dd0-63ba-4ee5-aa25-8ff2cbb762d3	TCGA-EL-A3D0	ecfcefcc-f732-408f-8d12-0c5bfdbb813b	TCGA-EL-A3D0-10A	'--	'--	'--	'--	'--	3829	'--	'--	'--	'--	'--	'--	'--	'--	FALSE	'--	'--	false	'--	'--	'--	Blood Derived Normal	10	'--	released	'--	'--	'--	Not Reported	'--	'--	'--
TCGA-THCA	63986dd0-63ba-4ee5-aa25-8ff2cbb762d3	TCGA-EL-A3D0	a9c9f0a8-9124-42f7-b6f0-877da3d93a67	TCGA-EL-A3D0-01Z	'--	'--	'--	'--	'--	'--	0	'--	'--	'--	'--	'--	'--	'--	TRUE	'--	'--	No	'--	'--	FFPE	Primary Tumor	1	'--	released	'--	'--	'--	Not Reported	'--	'--	'--
TCGA-THCA	2cb43652-109b-4b59-9fcd-512903591f45	TCGA-ET-A3BW	a9b534c2-2bef-4681-81f2-ebc6e93fe770	TCGA-ET-A3BW-01A	'--	'--	'--	'--	'--	155	'--	'--	'--	'--	'--	'--	210.0	'--	FALSE	'--	'--	true	'--	3F6367E6-F1F2-4019-A95B-EF5D78054A2B	'--	Primary Tumor	1	'--	released	'--	'--	'--	Not Reported	'--	'--	'--
TCGA-THCA	2cb43652-109b-4b59-9fcd-512903591f45	TCGA-ET-A3BW	00fd47f7-00a2-4fa1-8686-dc693399aaf9	TCGA-ET-A3BW-10A	'--	'--	'--	'--	'--	155	'--	'--	'--	'--	'--	'--	'--	'--	FALSE	'--	'--	false	'--	'--	'--	Blood Derived Normal	10	'--	released	'--	'--	'--	Not Reported	'--	'--	'--
TCGA-THCA	2cb43652-109b-4b59-9fcd-512903591f45	TCGA-ET-A3BW	39fe5325-6959-488e-a90f-88e45e5e0bfd	TCGA-ET-A3BW-01Z	'--	'--	'--	'--	'--	'--	0	'--	'--	'--	'--	'--	'--	'--	TRUE	'--	'--	No	'--	'--	FFPE	Primary Tumor	1	'--	released	'--	'--	'--	Not Reported	'--	'--	'--
TCGA-THCA	3e9fda23-676d-4e78-8948-0c9df3d10064	TCGA-DE-A0XZ	ad4709d5-c6bf-4d90-a479-fa500d25dd99	TCGA-DE-A0XZ-10A	'--	'--	'--	'--	'--	377	'--	'--	'--	'--	'--	'--	'--	'--	FALSE	'--	'--	false	'--	'--	'--	Blood Derived Normal	10	'--	released	'--	'--	'--	Not Reported	'--	'--	'--
TCGA-THCA	3e9fda23-676d-4e78-8948-0c9df3d10064	TCGA-DE-A0XZ	8281953b-47a1-439d-bed5-8803db42fa92	TCGA-DE-A0XZ-01A	'--	'--	'--	'--	'--	377	'--	'--	'--	'--	'--	'--	50.0	'--	FALSE	'--	'--	false	'--	DDD69861-E047-4D17-862A-06626959C9AD	'--	Primary Tumor	1	'--	released	'--	'--	'--	Not Reported	'--	'--	'--
TCGA-THCA	3e9fda23-676d-4e78-8948-0c9df3d10064	TCGA-DE-A0XZ	49bd62bd-f291-4013-a5bf-cccffe91779a	TCGA-DE-A0XZ-01Z	'--	'--	'--	'--	'--	'--	0	'--	'--	'--	'--	'--	'--	'--	TRUE	'--	'--	No	'--	'--	FFPE	Primary Tumor	1	'--	released	'--	'--	'--	Not Reported	'--	'--	'--
TCGA-THCA	1ebd5834-56b8-498a-8f34-c0031fcfd856	TCGA-DJ-A3VM	20d9ca9b-dedc-428a-a0f0-9332e4bb68aa	TCGA-DJ-A3VM-01A	'--	'--	'--	'--	'--	379	'--	'--	'--	'--	'--	'--	310.0	'--	FALSE	'--	'--	true	'--	2F246E42-FAA4-4E33-A22A-1F35ECC038FF	'--	Primary Tumor	1	'--	released	'--	'--	'--	Not Reported	'--	'--	'--
TCGA-THCA	1ebd5834-56b8-498a-8f34-c0031fcfd856	TCGA-DJ-A3VM	03f5c29f-1385-4fb3-9675-0e2964475414	TCGA-DJ-A3VM-01Z	'--	'--	'--	'--	'--	'--	0	'--	'--	'--	'--	'--	'--	'--	TRUE	'--	'--	No	'--	'--	FFPE	Primary Tumor	1	'--	released	'--	'--	'--	Not Reported	'--	'--	'--
TCGA-THCA	1ebd5834-56b8-498a-8f34-c0031fcfd856	TCGA-DJ-A3VM	d61187f9-f259-47e4-9c42-60fd891b8018	TCGA-DJ-A3VM-10A	'--	'--	'--	'--	'--	379	'--	'--	'--	'--	'--	'--	'--	'--	FALSE	'--	'--	false	'--	'--	'--	Blood Derived Normal	10	'--	released	'--	'--	'--	Not Reported	'--	'--	'--
TCGA-THCA	f82f9ae8-e106-4c61-941c-3614d51b0f41	TCGA-EL-A3MZ	75a694ff-7147-4aea-93e0-941470417517	TCGA-EL-A3MZ-11A	'--	'--	'--	'--	'--	5035	'--	'--	'--	'--	'--	'--	240.0	'--	FALSE	'--	'--	false	'--	'--	'--	Solid Tissue Normal	11	'--	released	'--	'--	'--	Not Reported	'--	'--	'--
TCGA-THCA	f82f9ae8-e106-4c61-941c-3614d51b0f41	TCGA-EL-A3MZ	5019256b-b0e9-4097-ab4e-88546bd61cdf	TCGA-EL-A3MZ-01A	'--	'--	'--	'--	'--	5035	'--	'--	'--	'--	'--	'--	210.0	'--	FALSE	'--	'--	false	'--	9AA7595E-A511-4AFE-B1AF-23E1A576B34A	'--	Primary Tumor	1	'--	released	'--	'--	'--	Not Reported	'--	'--	'--
TCGA-THCA	f82f9ae8-e106-4c61-941c-3614d51b0f41	TCGA-EL-A3MZ	1fd0b8c3-f24b-4e16-9cd2-fa6d40a878a8	TCGA-EL-A3MZ-01Z	'--	'--	'--	'--	'--	'--	0	'--	'--	'--	'--	'--	'--	'--	TRUE	'--	'--	No	'--	'--	FFPE	Primary Tumor	1	'--	released	'--	'--	'--	Not Reported	'--	'--	'--
TCGA-THCA	25184e51-1464-438a-80ff-cfc9a443cd36	TCGA-MK-A4N9	f76c35c0-c1b8-4fa0-8512-b660209373ec	TCGA-MK-A4N9-10A	'--	'--	'--	'--	'--	447	'--	'--	'--	'--	'--	'--	'--	'--	FALSE	'--	'--	false	'--	'--	'--	Blood Derived Normal	10	'--	released	'--	'--	'--	Not Reported	'--	'--	'--
TCGA-THCA	25184e51-1464-438a-80ff-cfc9a443cd36	TCGA-MK-A4N9	f85bc000-0e95-45b9-8614-edc42e777a90	TCGA-MK-A4N9-01A	'--	'--	'--	'--	'--	447	'--	'--	'--	'--	'--	'--	150.0	'--	FALSE	'--	'--	true	'--	0C6D4CF3-93B9-4F2B-82E7-7DE9251C82EE	'--	Primary Tumor	1	'--	released	'--	'--	'--	Not Reported	'--	'--	'--
TCGA-THCA	25184e51-1464-438a-80ff-cfc9a443cd36	TCGA-MK-A4N9	18a9cab0-bc61-48b6-8b1a-cd7592c26e11	TCGA-MK-A4N9-01Z	'--	'--	'--	'--	'--	'--	0	'--	'--	'--	'--	'--	'--	'--	TRUE	'--	'--	No	'--	'--	FFPE	Primary Tumor	1	'--	released	'--	'--	'--	Not Reported	'--	'--	'--
TCGA-THCA	f2ad720e-579f-4e2c-a3f0-17877ca91067	TCGA-DJ-A1QO	23a38bfd-4af5-44a9-b3c4-737d07e4e4f1	TCGA-DJ-A1QO-10A	'--	'--	'--	'--	'--	146	'--	'--	'--	'--	'--	'--	'--	'--	FALSE	'--	'--	false	'--	'--	'--	Blood Derived Normal	10	'--	released	'--	'--	'--	Not Reported	'--	'--	'--
TCGA-THCA	f2ad720e-579f-4e2c-a3f0-17877ca91067	TCGA-DJ-A1QO	03811796-0ece-4408-82f7-b449a631d2fb	TCGA-DJ-A1QO-01A	'--	'--	'--	'--	'--	146	'--	'--	'--	'--	'--	'--	240.0	'--	FALSE	'--	'--	true	'--	39783E42-ABA0-4CF3-B6E8-B2CCC922FAF4	'--	Primary Tumor	1	'--	released	'--	'--	'--	Not Reported	'--	'--	'--
TCGA-THCA	f2ad720e-579f-4e2c-a3f0-17877ca91067	TCGA-DJ-A1QO	27b81943-7e24-43d9-be73-acd369ba05d7	TCGA-DJ-A1QO-01Z	'--	'--	'--	'--	'--	'--	0	'--	'--	'--	'--	'--	'--	'--	TRUE	'--	'--	No	'--	'--	FFPE	Primary Tumor	1	'--	released	'--	'--	'--	Not Reported	'--	'--	'--
TCGA-THCA	e4c85bdd-7b7c-414f-9503-647d9b825915	TCGA-FE-A234	8765b072-83e1-40b2-b1c9-15f38d799fc3	TCGA-FE-A234-01A	'--	'--	'--	'--	'--	1340	'--	'--	'--	'--	'--	'--	130.0	'--	FALSE	'--	'--	false	'--	9161208D-62BA-4043-B3E6-25C0640B98E4	'--	Primary Tumor	1	'--	released	'--	'--	'--	Not Reported	'--	'--	'--
TCGA-THCA	e4c85bdd-7b7c-414f-9503-647d9b825915	TCGA-FE-A234	586e2bf1-b4e6-4c05-88a7-ea6fbaa10330	TCGA-FE-A234-01Z	'--	'--	'--	'--	'--	'--	0	'--	'--	'--	'--	'--	'--	'--	TRUE	'--	'--	No	'--	'--	FFPE	Primary Tumor	1	'--	released	'--	'--	'--	Not Reported	'--	'--	'--
TCGA-THCA	e4c85bdd-7b7c-414f-9503-647d9b825915	TCGA-FE-A234	2a2331f2-f5f1-42aa-bade-1365e899cb78	TCGA-FE-A234-10A	'--	'--	'--	'--	'--	1352	'--	'--	'--	'--	'--	'--	'--	'--	FALSE	'--	'--	false	'--	'--	'--	Blood Derived Normal	10	'--	released	'--	'--	'--	Not Reported	'--	'--	'--
TCGA-THCA	290be61a-84ef-4bed-8e37-b432cba6c88e	TCGA-EM-A1CT	14608e17-a38d-4f0e-9ca7-7922c8984ff1	TCGA-EM-A1CT-01A	'--	'--	'--	'--	'--	113	'--	'--	'--	'--	'--	'--	120.0	'--	FALSE	'--	'--	false	'--	A4AF37AD-CD79-4B94-92F8-005093DF0CA3	'--	Primary Tumor	1	'--	released	'--	'--	'--	Not Reported	'--	'--	'--
TCGA-THCA	290be61a-84ef-4bed-8e37-b432cba6c88e	TCGA-EM-A1CT	93845174-1e00-4b1c-8710-c67c52e032ba	TCGA-EM-A1CT-01Z	'--	'--	'--	'--	'--	'--	0	'--	'--	'--	'--	'--	'--	'--	TRUE	'--	'--	No	'--	'--	FFPE	Primary Tumor	1	'--	released	'--	'--	'--	Not Reported	'--	'--	'--
TCGA-THCA	290be61a-84ef-4bed-8e37-b432cba6c88e	TCGA-EM-A1CT	73c499b7-d508-4a99-870b-7483a64ac1ac	TCGA-EM-A1CT-11A	'--	'--	'--	'--	'--	113	'--	'--	'--	'--	'--	'--	120.0	'--	FALSE	'--	'--	false	'--	'--	'--	Solid Tissue Normal	11	'--	released	'--	'--	'--	Not Reported	'--	'--	'--
TCGA-THCA	290be61a-84ef-4bed-8e37-b432cba6c88e	TCGA-EM-A1CT	7e4817d9-7a81-400f-96f2-315edf0100e6	TCGA-EM-A1CT-10A	'--	'--	'--	'--	'--	113	'--	'--	'--	'--	'--	'--	'--	'--	FALSE	'--	'--	false	'--	'--	'--	Blood Derived Normal	10	'--	released	'--	'--	'--	Not Reported	'--	'--	'--
TCGA-THCA	d3d9ccdd-4789-43b0-8e73-b2c42cb7d83d	TCGA-KS-A4IB	952e57f0-a38f-46e0-8584-d82b66cb92c2	TCGA-KS-A4IB-11A	'--	'--	'--	'--	'--	2022	'--	'--	'--	'--	'--	'--	170.0	'--	FALSE	'--	'--	false	'--	'--	'--	Solid Tissue Normal	11	'--	released	'--	'--	'--	Not Reported	'--	'--	'--
TCGA-THCA	d3d9ccdd-4789-43b0-8e73-b2c42cb7d83d	TCGA-KS-A4IB	ac04a279-0fb7-453d-9fa6-cee17ace1206	TCGA-KS-A4IB-01A	'--	'--	'--	'--	'--	2022	'--	'--	'--	'--	'--	'--	170.0	'--	FALSE	'--	'--	false	'--	53A2A6C2-4847-459F-8881-E4C37FEF9D9E	'--	Primary Tumor	1	'--	released	'--	'--	'--	Not Reported	'--	'--	'--
TCGA-THCA	d3d9ccdd-4789-43b0-8e73-b2c42cb7d83d	TCGA-KS-A4IB	463024f6-5fbe-46d4-b4d2-d3d39f46a228	TCGA-KS-A4IB-01Z	'--	'--	'--	'--	'--	'--	0	'--	'--	'--	'--	'--	'--	'--	TRUE	'--	'--	No	'--	'--	FFPE	Primary Tumor	1	'--	released	'--	'--	'--	Not Reported	'--	'--	'--
TCGA-THCA	16505d78-90d9-47d0-9b86-c6ef91d23aac	TCGA-CE-A3MD	043bb4c8-50f9-46d9-aa32-a2bb9826f1fe	TCGA-CE-A3MD-01Z	'--	'--	'--	'--	'--	'--	0	'--	'--	'--	'--	'--	'--	'--	TRUE	'--	'--	No	'--	'--	FFPE	Primary Tumor	1	'--	released	'--	'--	'--	Not Reported	'--	'--	'--
TCGA-THCA	16505d78-90d9-47d0-9b86-c6ef91d23aac	TCGA-CE-A3MD	71dbaa74-9167-4a01-b02e-8f0d8a6bd391	TCGA-CE-A3MD-01A	'--	'--	'--	'--	'--	235	'--	'--	'--	'--	'--	'--	270.0	'--	FALSE	'--	'--	true	'--	E393C8DC-4578-4AA1-8938-5FFFBE32E825	'--	Primary Tumor	1	'--	released	'--	'--	'--	Not Reported	'--	'--	'--
TCGA-THCA	16505d78-90d9-47d0-9b86-c6ef91d23aac	TCGA-CE-A3MD	1ac43606-a152-448d-97cf-88b9fcd81199	TCGA-CE-A3MD-10A	'--	'--	'--	'--	'--	235	'--	'--	'--	'--	'--	'--	'--	'--	FALSE	'--	'--	false	'--	'--	'--	Blood Derived Normal	10	'--	released	'--	'--	'--	Not Reported	'--	'--	'--
TCGA-THCA	00d588e3-3db6-4cf3-9def-34d941e8cdb0	TCGA-J8-A3YF	30ff16f0-38dc-452f-b088-43ef6be19b57	TCGA-J8-A3YF-01A	'--	'--	'--	'--	'--	1038	'--	'--	'--	'--	'--	'--	110.0	'--	FALSE	'--	'--	true	'--	5098FC1F-A851-413D-80CA-FF512E458B26	'--	Primary Tumor	1	'--	released	'--	'--	'--	Not Reported	'--	'--	'--
TCGA-THCA	00d588e3-3db6-4cf3-9def-34d941e8cdb0	TCGA-J8-A3YF	f4152b9d-d770-4df5-abc2-d19262910ffa	TCGA-J8-A3YF-01Z	'--	'--	'--	'--	'--	'--	0	'--	'--	'--	'--	'--	'--	'--	TRUE	'--	'--	No	'--	'--	FFPE	Primary Tumor	1	'--	released	'--	'--	'--	Not Reported	'--	'--	'--
TCGA-THCA	00d588e3-3db6-4cf3-9def-34d941e8cdb0	TCGA-J8-A3YF	67c1dafa-6b74-4b24-8e74-b58d4807bd80	TCGA-J8-A3YF-10A	'--	'--	'--	'--	'--	1038	'--	'--	'--	'--	'--	'--	'--	'--	FALSE	'--	'--	false	'--	'--	'--	Blood Derived Normal	10	'--	released	'--	'--	'--	Not Reported	'--	'--	'--
TCGA-THCA	4be84ffe-4b12-4b71-90bb-9ea0ca6947f8	TCGA-E8-A433	702c4a82-fd01-4c73-b061-a9f800976c4b	TCGA-E8-A433-01Z	'--	'--	'--	'--	'--	'--	0	'--	'--	'--	'--	'--	'--	'--	TRUE	'--	'--	No	'--	'--	FFPE	Primary Tumor	1	'--	released	'--	'--	'--	Not Reported	'--	'--	'--
TCGA-THCA	4be84ffe-4b12-4b71-90bb-9ea0ca6947f8	TCGA-E8-A433	e252f9ce-8e6e-4005-abfc-f4a0ffbd76d5	TCGA-E8-A433-01A	'--	'--	'--	'--	'--	84	'--	'--	'--	'--	'--	'--	650.0	'--	FALSE	'--	'--	true	'--	A87AB565-515E-4DF2-BC2A-5420AB808377	'--	Primary Tumor	1	'--	released	'--	'--	'--	Not Reported	'--	'--	'--
TCGA-THCA	4be84ffe-4b12-4b71-90bb-9ea0ca6947f8	TCGA-E8-A433	37fceaf8-2f4a-4b27-a74c-57d381518e6b	TCGA-E8-A433-10A	'--	'--	'--	'--	'--	84	'--	'--	'--	'--	'--	'--	'--	'--	FALSE	'--	'--	false	'--	'--	'--	Blood Derived Normal	10	'--	released	'--	'--	'--	Not Reported	'--	'--	'--
TCGA-THCA	fd036ec5-3ffb-40b1-8002-943be0e2532e	TCGA-BJ-A3PR	6f05a28c-aceb-4fce-ab43-e44954dbd10e	TCGA-BJ-A3PR-01Z	'--	'--	'--	'--	'--	'--	0	'--	'--	'--	'--	'--	'--	'--	TRUE	'--	'--	No	'--	'--	FFPE	Primary Tumor	1	'--	released	'--	'--	'--	Not Reported	'--	'--	'--
TCGA-THCA	fd036ec5-3ffb-40b1-8002-943be0e2532e	TCGA-BJ-A3PR	3c13c880-e3e3-4c49-b486-c4388f8c33f3	TCGA-BJ-A3PR-11A	'--	'--	'--	'--	'--	204	'--	'--	'--	'--	'--	'--	250.0	'--	FALSE	'--	'--	true	'--	'--	'--	Solid Tissue Normal	11	'--	released	'--	'--	'--	Not Reported	'--	'--	'--
TCGA-THCA	fd036ec5-3ffb-40b1-8002-943be0e2532e	TCGA-BJ-A3PR	e058a8e1-ed00-48a5-a46b-77538d7b73f1	TCGA-BJ-A3PR-01A	'--	'--	'--	'--	'--	204	'--	'--	'--	'--	'--	'--	210.0	'--	FALSE	'--	'--	true	'--	9C4A4B7A-9341-404C-9804-6B91FDFC3F2C	'--	Primary Tumor	1	'--	released	'--	'--	'--	Not Reported	'--	'--	'--
TCGA-THCA	fd036ec5-3ffb-40b1-8002-943be0e2532e	TCGA-BJ-A3PR	fd054193-a342-4faf-8af5-69ab1abd5bac	TCGA-BJ-A3PR-10A	'--	'--	'--	'--	'--	204	'--	'--	'--	'--	'--	'--	'--	'--	FALSE	'--	'--	false	'--	'--	'--	Blood Derived Normal	10	'--	released	'--	'--	'--	Not Reported	'--	'--	'--
TCGA-THCA	4cccc34b-daf6-41ca-9bf8-f1614525eac9	TCGA-BJ-A3PU	0be2571e-3572-4974-95ce-21b9972b24b2	TCGA-BJ-A3PU-01A	'--	'--	'--	'--	'--	168	'--	'--	'--	'--	'--	'--	590.0	'--	FALSE	'--	'--	true	'--	32481AD7-2C27-408C-81AF-FB53FF84DB25	'--	Primary Tumor	1	'--	released	'--	'--	'--	Not Reported	'--	'--	'--
TCGA-THCA	4cccc34b-daf6-41ca-9bf8-f1614525eac9	TCGA-BJ-A3PU	0f717e35-9dd7-4f18-9061-0984256642ec	TCGA-BJ-A3PU-10A	'--	'--	'--	'--	'--	168	'--	'--	'--	'--	'--	'--	'--	'--	FALSE	'--	'--	false	'--	'--	'--	Blood Derived Normal	10	'--	released	'--	'--	'--	Not Reported	'--	'--	'--
TCGA-THCA	4cccc34b-daf6-41ca-9bf8-f1614525eac9	TCGA-BJ-A3PU	c04a44b4-6472-45e7-8414-1a626200d7dc	TCGA-BJ-A3PU-01Z	'--	'--	'--	'--	'--	'--	0	'--	'--	'--	'--	'--	'--	'--	TRUE	'--	'--	No	'--	'--	FFPE	Primary Tumor	1	'--	released	'--	'--	'--	Not Reported	'--	'--	'--
TCGA-THCA	4cccc34b-daf6-41ca-9bf8-f1614525eac9	TCGA-BJ-A3PU	57fa975b-608c-48fd-b515-dfb145b13028	TCGA-BJ-A3PU-11A	'--	'--	'--	'--	'--	168	'--	'--	'--	'--	'--	'--	200.0	'--	FALSE	'--	'--	true	'--	'--	'--	Solid Tissue Normal	11	'--	released	'--	'--	'--	Not Reported	'--	'--	'--
TCGA-THCA	c951b786-7de3-4195-85b9-c4c19e95f546	TCGA-EL-A3CZ	2a4eb6bc-e203-4c1e-8ca1-994ac89d7925	TCGA-EL-A3CZ-01Z	'--	'--	'--	'--	'--	'--	0	'--	'--	'--	'--	'--	'--	'--	TRUE	'--	'--	No	'--	'--	FFPE	Primary Tumor	1	'--	released	'--	'--	'--	Not Reported	'--	'--	'--
TCGA-THCA	c951b786-7de3-4195-85b9-c4c19e95f546	TCGA-EL-A3CZ	f5446cf5-5fee-4abc-8cc5-b68a25185b66	TCGA-EL-A3CZ-01A	'--	'--	'--	'--	'--	1410	'--	'--	'--	'--	'--	'--	240.0	'--	FALSE	'--	'--	true	'--	3C4CDCCA-488D-40B2-96AA-1D7B78669FE9	'--	Primary Tumor	1	'--	released	'--	'--	'--	Not Reported	'--	'--	'--
TCGA-THCA	c951b786-7de3-4195-85b9-c4c19e95f546	TCGA-EL-A3CZ	d6965d91-544d-458f-ba32-2a9310623191	TCGA-EL-A3CZ-10A	'--	'--	'--	'--	'--	1410	'--	'--	'--	'--	'--	'--	'--	'--	FALSE	'--	'--	false	'--	'--	'--	Blood Derived Normal	10	'--	released	'--	'--	'--	Not Reported	'--	'--	'--
TCGA-THCA	80da6e75-b7ad-47a6-9923-1e21a519a968	TCGA-CE-A483	f722da16-61f9-49aa-b9d2-7c94e086afdb	TCGA-CE-A483-01Z	'--	'--	'--	'--	'--	'--	0	'--	'--	'--	'--	'--	'--	'--	TRUE	'--	'--	No	'--	'--	FFPE	Primary Tumor	1	'--	released	'--	'--	'--	Not Reported	'--	'--	'--
TCGA-THCA	80da6e75-b7ad-47a6-9923-1e21a519a968	TCGA-CE-A483	222eaf1f-a7cb-4fb7-b78f-b1c58c4e15d0	TCGA-CE-A483-01A	'--	'--	'--	'--	'--	143	'--	'--	'--	'--	'--	'--	360.0	'--	FALSE	'--	'--	true	'--	A8449805-4FFB-4546-9280-B3E801F02AAD	'--	Primary Tumor	1	'--	released	'--	'--	'--	Not Reported	'--	'--	'--
TCGA-THCA	80da6e75-b7ad-47a6-9923-1e21a519a968	TCGA-CE-A483	618a88ce-6d32-47bb-9e45-2423ff3f1c2b	TCGA-CE-A483-10A	'--	'--	'--	'--	'--	143	'--	'--	'--	'--	'--	'--	'--	'--	FALSE	'--	'--	false	'--	'--	'--	Blood Derived Normal	10	'--	released	'--	'--	'--	Not Reported	'--	'--	'--
TCGA-THCA	da201150-748e-4b74-bb35-10c995e26079	TCGA-DJ-A1QD	a8307181-67ce-4a79-8d23-76ceee1d2761	TCGA-DJ-A1QD-01A	'--	'--	'--	'--	'--	205	'--	'--	'--	'--	'--	'--	240.0	'--	FALSE	'--	'--	true	'--	600E6160-AB49-4301-BE9F-EAF377C678A5	'--	Primary Tumor	1	'--	released	'--	'--	'--	Not Reported	'--	'--	'--
TCGA-THCA	da201150-748e-4b74-bb35-10c995e26079	TCGA-DJ-A1QD	be3a9226-dda7-491f-910b-8bc614635db5	TCGA-DJ-A1QD-10A	'--	'--	'--	'--	'--	205	'--	'--	'--	'--	'--	'--	'--	'--	FALSE	'--	'--	false	'--	'--	'--	Blood Derived Normal	10	'--	released	'--	'--	'--	Not Reported	'--	'--	'--
TCGA-THCA	da201150-748e-4b74-bb35-10c995e26079	TCGA-DJ-A1QD	d5c566fa-6534-43b7-8ab9-68fc040e54cd	TCGA-DJ-A1QD-01Z	'--	'--	'--	'--	'--	'--	0	'--	'--	'--	'--	'--	'--	'--	TRUE	'--	'--	No	'--	'--	FFPE	Primary Tumor	1	'--	released	'--	'--	'--	Not Reported	'--	'--	'--
TCGA-THCA	95dcd0a2-2fcd-4952-9022-d8143ba61fac	TCGA-EM-A3SY	074115e2-98f2-4fa0-afae-595e1beb6093	TCGA-EM-A3SY-10A	'--	'--	'--	'--	'--	205	'--	'--	'--	'--	'--	'--	'--	'--	FALSE	'--	'--	false	'--	'--	'--	Blood Derived Normal	10	'--	released	'--	'--	'--	Not Reported	'--	'--	'--
TCGA-THCA	95dcd0a2-2fcd-4952-9022-d8143ba61fac	TCGA-EM-A3SY	33c431eb-793b-47a5-b6bf-830fb05e8f57	TCGA-EM-A3SY-01Z	'--	'--	'--	'--	'--	'--	0	'--	'--	'--	'--	'--	'--	'--	TRUE	'--	'--	No	'--	'--	FFPE	Primary Tumor	1	'--	released	'--	'--	'--	Not Reported	'--	'--	'--
TCGA-THCA	95dcd0a2-2fcd-4952-9022-d8143ba61fac	TCGA-EM-A3SY	2a19a202-c53e-44bf-a721-5dff12e33c7a	TCGA-EM-A3SY-01A	'--	'--	'--	'--	'--	148	'--	'--	'--	'--	'--	'--	100.0	'--	FALSE	'--	'--	false	'--	D989DFCB-64F0-48A5-A70C-B1D8B9044417	'--	Primary Tumor	1	'--	released	'--	'--	'--	Not Reported	'--	'--	'--
TCGA-THCA	5e085199-152a-40f5-a8f8-3a3a0f31c2e0	TCGA-DJ-A3UW	ff254bd0-0c42-4acb-ab84-4fd3d3aa0453	TCGA-DJ-A3UW-10A	'--	'--	'--	'--	'--	1665	'--	'--	'--	'--	'--	'--	'--	'--	FALSE	'--	'--	false	'--	'--	'--	Blood Derived Normal	10	'--	released	'--	'--	'--	Not Reported	'--	'--	'--
TCGA-THCA	5e085199-152a-40f5-a8f8-3a3a0f31c2e0	TCGA-DJ-A3UW	a4e8793d-2551-49be-a437-2247ba4f23fc	TCGA-DJ-A3UW-01Z	'--	'--	'--	'--	'--	'--	0	'--	'--	'--	'--	'--	'--	'--	TRUE	'--	'--	No	'--	'--	FFPE	Primary Tumor	1	'--	released	'--	'--	'--	Not Reported	'--	'--	'--
TCGA-THCA	5e085199-152a-40f5-a8f8-3a3a0f31c2e0	TCGA-DJ-A3UW	8985644d-c4a6-475d-b090-0148b5c4cdf9	TCGA-DJ-A3UW-01A	'--	'--	'--	'--	'--	1665	'--	'--	'--	'--	'--	'--	40.0	'--	FALSE	'--	'--	true	'--	6DB2037F-9651-4EEB-AFF9-15A23BB19EE4	'--	Primary Tumor	1	'--	released	'--	'--	'--	Not Reported	'--	'--	'--
TCGA-THCA	9efd27c7-9893-49fd-886e-e85057dd5d2e	TCGA-DE-A69J	ad2483b4-4368-4396-bbb0-0455a3f9cb19	TCGA-DE-A69J-01Z	'--	'--	'--	'--	'--	'--	0	'--	'--	'--	'--	'--	'--	'--	TRUE	'--	'--	No	'--	'--	FFPE	Primary Tumor	1	'--	released	'--	'--	'--	Not Reported	'--	'--	'--
TCGA-THCA	9efd27c7-9893-49fd-886e-e85057dd5d2e	TCGA-DE-A69J	00968b81-7b40-4fd6-b998-b324d394bf86	TCGA-DE-A69J-10A	'--	'--	'--	'--	'--	126	'--	'--	'--	'--	'--	'--	'--	'--	FALSE	'--	'--	false	'--	'--	'--	Blood Derived Normal	10	'--	released	'--	'--	'--	Not Reported	'--	'--	'--
TCGA-THCA	9efd27c7-9893-49fd-886e-e85057dd5d2e	TCGA-DE-A69J	3681c965-0d71-47c2-ac05-f553bae0a833	TCGA-DE-A69J-01A	'--	'--	'--	'--	'--	126	'--	'--	'--	'--	'--	'--	130.0	'--	FALSE	'--	'--	false	'--	90A9DDB6-4DCF-4467-908F-25A5481B5D70	'--	Primary Tumor	1	'--	released	'--	'--	'--	Not Reported	'--	'--	'--
TCGA-THCA	3a7c35e0-9ed1-4098-8585-52f5991b2534	TCGA-IM-A3EB	d750a3c8-8c52-461b-a850-3bbd132710d5	TCGA-IM-A3EB-10A	'--	'--	'--	'--	'--	1055	'--	'--	'--	'--	'--	'--	'--	'--	FALSE	'--	'--	false	'--	'--	'--	Blood Derived Normal	10	'--	released	'--	'--	'--	Not Reported	'--	'--	'--
TCGA-THCA	3a7c35e0-9ed1-4098-8585-52f5991b2534	TCGA-IM-A3EB	b39d863a-d536-4364-9266-3ca2a9cb5754	TCGA-IM-A3EB-01A	'--	'--	'--	'--	'--	1055	'--	'--	'--	'--	'--	'--	240.0	'--	FALSE	'--	'--	true	'--	22185BE8-EB63-43CE-AC8C-93BBD20A8570	'--	Primary Tumor	1	'--	released	'--	'--	'--	Not Reported	'--	'--	'--
TCGA-THCA	3a7c35e0-9ed1-4098-8585-52f5991b2534	TCGA-IM-A3EB	dbc5563e-9ea1-4cbe-9102-1f24b30ab507	TCGA-IM-A3EB-01Z	'--	'--	'--	'--	'--	'--	0	'--	'--	'--	'--	'--	'--	'--	TRUE	'--	'--	No	'--	'--	FFPE	Primary Tumor	1	'--	released	'--	'--	'--	Not Reported	'--	'--	'--
TCGA-THCA	dc2bece1-1fcd-467a-8476-da171d56488c	TCGA-EM-A2CJ	62fd7b02-f688-40d1-8c2e-ae5419440b15	TCGA-EM-A2CJ-10A	'--	'--	'--	'--	'--	321	'--	'--	'--	'--	'--	'--	'--	'--	FALSE	'--	'--	false	'--	'--	'--	Blood Derived Normal	10	'--	released	'--	'--	'--	Not Reported	'--	'--	'--
TCGA-THCA	dc2bece1-1fcd-467a-8476-da171d56488c	TCGA-EM-A2CJ	fe801338-3bd5-4900-b92c-98af6cc548b0	TCGA-EM-A2CJ-01Z	'--	'--	'--	'--	'--	'--	0	'--	'--	'--	'--	'--	'--	'--	TRUE	'--	'--	No	'--	'--	FFPE	Primary Tumor	1	'--	released	'--	'--	'--	Not Reported	'--	'--	'--
TCGA-THCA	dc2bece1-1fcd-467a-8476-da171d56488c	TCGA-EM-A2CJ	5b3977d1-818e-4f61-9b09-0dc5085a183b	TCGA-EM-A2CJ-01A	'--	'--	'--	'--	'--	231	'--	'--	'--	'--	'--	'--	140.0	'--	FALSE	'--	'--	false	'--	09CC2B22-1C81-474B-82F2-D69FE5ACC413	'--	Primary Tumor	1	'--	released	'--	'--	'--	Not Reported	'--	'--	'--
TCGA-THCA	aa6e3437-ea1c-4bed-ab7d-8f3f89f8ceeb	TCGA-EL-A4K1	56f93cd9-7925-4804-95e2-5b647ecff2d1	TCGA-EL-A4K1-01A	'--	'--	'--	'--	'--	753	'--	'--	'--	'--	'--	'--	200.0	'--	FALSE	'--	'--	false	'--	65C051CF-2A8C-4B14-99C4-34FDECE59532	'--	Primary Tumor	1	'--	released	'--	'--	'--	Not Reported	'--	'--	'--
TCGA-THCA	aa6e3437-ea1c-4bed-ab7d-8f3f89f8ceeb	TCGA-EL-A4K1	0b8db143-72b4-4b86-a642-445c5559e7fc	TCGA-EL-A4K1-11A	'--	'--	'--	'--	'--	753	'--	'--	'--	'--	'--	'--	240.0	'--	FALSE	'--	'--	false	'--	'--	'--	Solid Tissue Normal	11	'--	released	'--	'--	'--	Not Reported	'--	'--	'--
TCGA-THCA	aa6e3437-ea1c-4bed-ab7d-8f3f89f8ceeb	TCGA-EL-A4K1	bbb82e99-7d8d-4859-9d2e-824f90d52392	TCGA-EL-A4K1-01Z	'--	'--	'--	'--	'--	'--	0	'--	'--	'--	'--	'--	'--	'--	TRUE	'--	'--	No	'--	'--	FFPE	Primary Tumor	1	'--	released	'--	'--	'--	Not Reported	'--	'--	'--
TCGA-THCA	35277c30-010c-4d3f-9dfe-754bf72799d7	TCGA-DJ-A3V4	d0559f85-0ef7-4e85-b5ec-0566142d4245	TCGA-DJ-A3V4-10A	'--	'--	'--	'--	'--	345	'--	'--	'--	'--	'--	'--	'--	'--	FALSE	'--	'--	false	'--	'--	'--	Blood Derived Normal	10	'--	released	'--	'--	'--	Not Reported	'--	'--	'--
TCGA-THCA	35277c30-010c-4d3f-9dfe-754bf72799d7	TCGA-DJ-A3V4	cba45b58-0235-42e4-92c4-1c94b84740af	TCGA-DJ-A3V4-01Z	'--	'--	'--	'--	'--	'--	0	'--	'--	'--	'--	'--	'--	'--	TRUE	'--	'--	No	'--	'--	FFPE	Primary Tumor	1	'--	released	'--	'--	'--	Not Reported	'--	'--	'--
TCGA-THCA	35277c30-010c-4d3f-9dfe-754bf72799d7	TCGA-DJ-A3V4	7ec39a22-ed7c-44b5-97c3-26363239fe91	TCGA-DJ-A3V4-01A	'--	'--	'--	'--	'--	345	'--	'--	'--	'--	'--	'--	60.0	'--	FALSE	'--	'--	true	'--	F2C37C78-F561-46CE-809A-AA66BB580006	'--	Primary Tumor	1	'--	released	'--	'--	'--	Not Reported	'--	'--	'--
TCGA-THCA	aa3ce865-4bc1-4cca-9ba8-35ff4c5e165e	TCGA-E8-A432	494a9c6b-502e-45b3-bed0-175f753c0a27	TCGA-E8-A432-10A	'--	'--	'--	'--	'--	98	'--	'--	'--	'--	'--	'--	'--	'--	FALSE	'--	'--	false	'--	'--	'--	Blood Derived Normal	10	'--	released	'--	'--	'--	Not Reported	'--	'--	'--
TCGA-THCA	aa3ce865-4bc1-4cca-9ba8-35ff4c5e165e	TCGA-E8-A432	523bd23d-3439-4331-983c-2b730c36ae45	TCGA-E8-A432-01Z	'--	'--	'--	'--	'--	'--	0	'--	'--	'--	'--	'--	'--	'--	TRUE	'--	'--	No	'--	'--	FFPE	Primary Tumor	1	'--	released	'--	'--	'--	Not Reported	'--	'--	'--
TCGA-THCA	aa3ce865-4bc1-4cca-9ba8-35ff4c5e165e	TCGA-E8-A432	380ad5e3-0cb9-484e-9a9f-fadc9b3e4b84	TCGA-E8-A432-01A	'--	'--	'--	'--	'--	98	'--	'--	'--	'--	'--	'--	580.0	'--	FALSE	'--	'--	true	'--	709BEB00-E3BB-41EE-B600-5AAE02867871	'--	Primary Tumor	1	'--	released	'--	'--	'--	Not Reported	'--	'--	'--
TCGA-THCA	90750006-fb25-4ccd-90df-9f300cd26a5b	TCGA-E3-A3E5	d8ed5097-1cbf-4a24-ac6f-3740c020639d	TCGA-E3-A3E5-10A	'--	'--	'--	'--	'--	408	'--	'--	'--	'--	'--	'--	'--	'--	FALSE	'--	'--	false	'--	'--	'--	Blood Derived Normal	10	'--	released	'--	'--	'--	Not Reported	'--	'--	'--
TCGA-THCA	90750006-fb25-4ccd-90df-9f300cd26a5b	TCGA-E3-A3E5	78fbbe25-11ca-4219-93e4-85d4ca64b41b	TCGA-E3-A3E5-01A	'--	'--	'--	'--	'--	352	'--	'--	'--	'--	'--	'--	220.0	'--	FALSE	'--	'--	false	'--	8BE54EAA-1E14-4257-A78E-B1A4782FC9D8	'--	Primary Tumor	1	'--	released	'--	'--	'--	Not Reported	'--	'--	'--
TCGA-THCA	90750006-fb25-4ccd-90df-9f300cd26a5b	TCGA-E3-A3E5	bde8da3b-1be1-426e-8a1c-2a1dbd07bfd4	TCGA-E3-A3E5-01Z	'--	'--	'--	'--	'--	'--	0	'--	'--	'--	'--	'--	'--	'--	TRUE	'--	'--	No	'--	'--	FFPE	Primary Tumor	1	'--	released	'--	'--	'--	Not Reported	'--	'--	'--
TCGA-THCA	b30f5b13-8cc9-48a0-93ea-3d49ce8a7d0d	TCGA-BJ-A28X	aaabcfee-6bf8-42a2-9264-22e71659a78b	TCGA-BJ-A28X-10A	'--	'--	'--	'--	'--	161	'--	'--	'--	'--	'--	'--	'--	'--	FALSE	'--	'--	false	'--	'--	'--	Blood Derived Normal	10	'--	released	'--	'--	'--	Not Reported	'--	'--	'--
TCGA-THCA	b30f5b13-8cc9-48a0-93ea-3d49ce8a7d0d	TCGA-BJ-A28X	0bf42a8c-0b31-4254-ab35-af562aa6e86b	TCGA-BJ-A28X-11A	'--	'--	'--	'--	'--	161	'--	'--	'--	'--	'--	'--	140.0	'--	FALSE	'--	'--	true	'--	'--	'--	Solid Tissue Normal	11	'--	released	'--	'--	'--	Not Reported	'--	'--	'--
TCGA-THCA	b30f5b13-8cc9-48a0-93ea-3d49ce8a7d0d	TCGA-BJ-A28X	339903f0-da9d-46dd-88d9-8bd89f48ce44	TCGA-BJ-A28X-01Z	'--	'--	'--	'--	'--	'--	0	'--	'--	'--	'--	'--	'--	'--	TRUE	'--	'--	No	'--	'--	FFPE	Primary Tumor	1	'--	released	'--	'--	'--	Not Reported	'--	'--	'--
TCGA-THCA	b30f5b13-8cc9-48a0-93ea-3d49ce8a7d0d	TCGA-BJ-A28X	390381cf-49d5-4caf-92e2-1316746cfa1d	TCGA-BJ-A28X-01A	'--	'--	'--	'--	'--	161	'--	'--	'--	'--	'--	'--	170.0	'--	FALSE	'--	'--	true	'--	BECBC693-AC81-4094-8833-28189B8BF8C7	'--	Primary Tumor	1	'--	released	'--	'--	'--	Not Reported	'--	'--	'--
TCGA-THCA	08293bf4-727d-45c2-abbf-1aec3ba1c8a4	TCGA-EL-A4K0	2f9b1634-04b5-44ad-8ec2-a23ef4ffb0dd	TCGA-EL-A4K0-01A	'--	'--	'--	'--	'--	757	'--	'--	'--	'--	'--	'--	200.0	'--	FALSE	'--	'--	false	'--	2F14B1E2-580C-4637-9574-DCA2DB4F38C7	'--	Primary Tumor	1	'--	released	'--	'--	'--	Not Reported	'--	'--	'--
TCGA-THCA	08293bf4-727d-45c2-abbf-1aec3ba1c8a4	TCGA-EL-A4K0	e3feec3f-2a6d-4bc4-bf02-f36ba1fd0396	TCGA-EL-A4K0-01Z	'--	'--	'--	'--	'--	'--	0	'--	'--	'--	'--	'--	'--	'--	TRUE	'--	'--	No	'--	'--	FFPE	Primary Tumor	1	'--	released	'--	'--	'--	Not Reported	'--	'--	'--
TCGA-THCA	08293bf4-727d-45c2-abbf-1aec3ba1c8a4	TCGA-EL-A4K0	aa1f72d0-5134-495f-a8a1-6d0ebc9642df	TCGA-EL-A4K0-11A	'--	'--	'--	'--	'--	757	'--	'--	'--	'--	'--	'--	240.0	'--	FALSE	'--	'--	false	'--	'--	'--	Solid Tissue Normal	11	'--	released	'--	'--	'--	Not Reported	'--	'--	'--
TCGA-THCA	fd25e4e6-f017-4c07-b109-d8a5eea8763c	TCGA-DJ-A2PY	fc88de58-443e-4a68-a135-f6c515f8490a	TCGA-DJ-A2PY-10A	'--	'--	'--	'--	'--	105	'--	'--	'--	'--	'--	'--	'--	'--	FALSE	'--	'--	false	'--	'--	'--	Blood Derived Normal	10	'--	released	'--	'--	'--	Not Reported	'--	'--	'--
TCGA-THCA	fd25e4e6-f017-4c07-b109-d8a5eea8763c	TCGA-DJ-A2PY	73d739b6-dc5f-490f-9df4-42ae166c7a66	TCGA-DJ-A2PY-01Z	'--	'--	'--	'--	'--	'--	0	'--	'--	'--	'--	'--	'--	'--	TRUE	'--	'--	No	'--	'--	FFPE	Primary Tumor	1	'--	released	'--	'--	'--	Not Reported	'--	'--	'--
TCGA-THCA	fd25e4e6-f017-4c07-b109-d8a5eea8763c	TCGA-DJ-A2PY	1e252534-d457-4a24-aea1-1bc334c881f7	TCGA-DJ-A2PY-01A	'--	'--	'--	'--	'--	105	'--	'--	'--	'--	'--	'--	220.0	'--	FALSE	'--	'--	true	'--	4EFD0576-046A-4F23-BA02-637B2E38EDFB	'--	Primary Tumor	1	'--	released	'--	'--	'--	Not Reported	'--	'--	'--
TCGA-THCA	e9949320-ad37-4542-98c1-b72df60b1668	TCGA-ET-A39M	26446aec-2035-4eab-ba3f-8807b64f7583	TCGA-ET-A39M-01A	'--	'--	'--	'--	'--	2520	'--	'--	'--	'--	'--	'--	90.0	'--	FALSE	'--	'--	true	'--	978AE60E-CA27-49D9-A338-1338005A672A	'--	Primary Tumor	1	'--	released	'--	'--	'--	Not Reported	'--	'--	'--
TCGA-THCA	e9949320-ad37-4542-98c1-b72df60b1668	TCGA-ET-A39M	01a1a339-6572-4322-bcce-c3d0301ceb01	TCGA-ET-A39M-01Z	'--	'--	'--	'--	'--	'--	0	'--	'--	'--	'--	'--	'--	'--	TRUE	'--	'--	No	'--	'--	FFPE	Primary Tumor	1	'--	released	'--	'--	'--	Not Reported	'--	'--	'--
TCGA-THCA	e9949320-ad37-4542-98c1-b72df60b1668	TCGA-ET-A39M	1b5ec733-a6d5-43ff-ba4e-719b754fb92b	TCGA-ET-A39M-10A	'--	'--	'--	'--	'--	2520	'--	'--	'--	'--	'--	'--	'--	'--	FALSE	'--	'--	false	'--	'--	'--	Blood Derived Normal	10	'--	released	'--	'--	'--	Not Reported	'--	'--	'--
TCGA-THCA	c5fd200b-ce02-4d7d-a240-78f147e483be	TCGA-DJ-A3UR	9201c13a-4dbe-48b2-9324-95a4b667f198	TCGA-DJ-A3UR-01A	'--	'--	'--	'--	'--	623	'--	'--	'--	'--	'--	'--	80.0	'--	FALSE	'--	'--	true	'--	BB1A0D13-F803-43E4-AD87-34E37B6932FD	'--	Primary Tumor	1	'--	released	'--	'--	'--	Not Reported	'--	'--	'--
TCGA-THCA	c5fd200b-ce02-4d7d-a240-78f147e483be	TCGA-DJ-A3UR	67af4ed4-e689-4e3f-924b-e033480217b6	TCGA-DJ-A3UR-10A	'--	'--	'--	'--	'--	623	'--	'--	'--	'--	'--	'--	'--	'--	FALSE	'--	'--	false	'--	'--	'--	Blood Derived Normal	10	'--	released	'--	'--	'--	Not Reported	'--	'--	'--
TCGA-THCA	c5fd200b-ce02-4d7d-a240-78f147e483be	TCGA-DJ-A3UR	8f8a789e-9fb4-4e9a-92fa-57d13400ee79	TCGA-DJ-A3UR-01Z	'--	'--	'--	'--	'--	'--	0	'--	'--	'--	'--	'--	'--	'--	TRUE	'--	'--	No	'--	'--	FFPE	Primary Tumor	1	'--	released	'--	'--	'--	Not Reported	'--	'--	'--
TCGA-THCA	2513ab46-646c-4750-ab42-de3940890553	TCGA-ET-A40R	e54b68ac-ec88-4a45-844c-c36bc192ce4e	TCGA-ET-A40R-10A	'--	'--	'--	'--	'--	363	'--	'--	'--	'--	'--	'--	'--	'--	FALSE	'--	'--	false	'--	'--	'--	Blood Derived Normal	10	'--	released	'--	'--	'--	Not Reported	'--	'--	'--
TCGA-THCA	2513ab46-646c-4750-ab42-de3940890553	TCGA-ET-A40R	31ce27d6-daa0-4ca1-9043-bdfeae5c7862	TCGA-ET-A40R-01Z	'--	'--	'--	'--	'--	'--	0	'--	'--	'--	'--	'--	'--	'--	TRUE	'--	'--	No	'--	'--	FFPE	Primary Tumor	1	'--	released	'--	'--	'--	Not Reported	'--	'--	'--
TCGA-THCA	2513ab46-646c-4750-ab42-de3940890553	TCGA-ET-A40R	72322d63-14a4-4ab9-bcb3-3dca1693a73b	TCGA-ET-A40R-01A	'--	'--	'--	'--	'--	363	'--	'--	'--	'--	'--	'--	210.0	'--	FALSE	'--	'--	true	'--	16EB0191-4EEF-4425-9CBF-1B10089790D8	'--	Primary Tumor	1	'--	released	'--	'--	'--	Not Reported	'--	'--	'--
TCGA-THCA	4fc8e011-4433-4537-b03f-457a3a70240f	TCGA-EL-A4K6	cd707d1b-3e27-4de7-a3e6-c089538378a5	TCGA-EL-A4K6-01Z	'--	'--	'--	'--	'--	'--	0	'--	'--	'--	'--	'--	'--	'--	TRUE	'--	'--	No	'--	'--	FFPE	Primary Tumor	1	'--	released	'--	'--	'--	Not Reported	'--	'--	'--
TCGA-THCA	4fc8e011-4433-4537-b03f-457a3a70240f	TCGA-EL-A4K6	01fd30bd-38cd-4796-9976-c60a85c374f1	TCGA-EL-A4K6-11A	'--	'--	'--	'--	'--	750	'--	'--	'--	'--	'--	'--	250.0	'--	FALSE	'--	'--	false	'--	'--	'--	Solid Tissue Normal	11	'--	released	'--	'--	'--	Not Reported	'--	'--	'--
TCGA-THCA	4fc8e011-4433-4537-b03f-457a3a70240f	TCGA-EL-A4K6	bb98ff62-4cd8-46d6-9a85-8439265be40b	TCGA-EL-A4K6-01A	'--	'--	'--	'--	'--	750	'--	'--	'--	'--	'--	'--	210.0	'--	FALSE	'--	'--	false	'--	8EC3C2D5-F169-4C1D-B38F-536FCF1FDD67	'--	Primary Tumor	1	'--	released	'--	'--	'--	Not Reported	'--	'--	'--
TCGA-THCA	90473122-7221-491d-8fc2-0c72421d7861	TCGA-EM-A3FM	de6423ce-9cf4-4891-bb1e-bfd8da656e67	TCGA-EM-A3FM-01A	'--	'--	'--	'--	'--	248	'--	'--	'--	'--	'--	'--	80.0	'--	FALSE	'--	'--	false	'--	C5F78F74-2FDB-4D1C-8133-410918A35A64	'--	Primary Tumor	1	'--	released	'--	'--	'--	Not Reported	'--	'--	'--
TCGA-THCA	90473122-7221-491d-8fc2-0c72421d7861	TCGA-EM-A3FM	d3e3e994-82b9-4841-bf8f-fdf93ccd021b	TCGA-EM-A3FM-10A	'--	'--	'--	'--	'--	311	'--	'--	'--	'--	'--	'--	'--	'--	FALSE	'--	'--	false	'--	'--	'--	Blood Derived Normal	10	'--	released	'--	'--	'--	Not Reported	'--	'--	'--
TCGA-THCA	90473122-7221-491d-8fc2-0c72421d7861	TCGA-EM-A3FM	4f50e771-91dc-452c-a2ed-6f75dd7169e4	TCGA-EM-A3FM-01Z	'--	'--	'--	'--	'--	'--	0	'--	'--	'--	'--	'--	'--	'--	TRUE	'--	'--	No	'--	'--	FFPE	Primary Tumor	1	'--	released	'--	'--	'--	Not Reported	'--	'--	'--
TCGA-THCA	2610485e-f2b2-45f7-a578-99d6983d5f0e	TCGA-DJ-A3UP	1838e2fe-367b-4374-bb19-a1898cf6d19d	TCGA-DJ-A3UP-10A	'--	'--	'--	'--	'--	148	'--	'--	'--	'--	'--	'--	'--	'--	FALSE	'--	'--	false	'--	'--	'--	Blood Derived Normal	10	'--	released	'--	'--	'--	Not Reported	'--	'--	'--
TCGA-THCA	2610485e-f2b2-45f7-a578-99d6983d5f0e	TCGA-DJ-A3UP	6b6e5d24-4bbd-45b8-9505-ecf76c9310c9	TCGA-DJ-A3UP-01Z	'--	'--	'--	'--	'--	'--	0	'--	'--	'--	'--	'--	'--	'--	TRUE	'--	'--	No	'--	'--	FFPE	Primary Tumor	1	'--	released	'--	'--	'--	Not Reported	'--	'--	'--
TCGA-THCA	2610485e-f2b2-45f7-a578-99d6983d5f0e	TCGA-DJ-A3UP	1d5dfcf4-8d9c-4a0a-9b5d-a7060574973a	TCGA-DJ-A3UP-01A	'--	'--	'--	'--	'--	148	'--	'--	'--	'--	'--	'--	310.0	'--	FALSE	'--	'--	true	'--	237FE672-A255-4C6D-A53F-CF7234779BE4	'--	Primary Tumor	1	'--	released	'--	'--	'--	Not Reported	'--	'--	'--
TCGA-THCA	94443df0-7f16-4178-9e66-bee82f6ca33a	TCGA-DJ-A3VK	4d3cb4a0-2930-4e8f-ad92-cfeeea183b2c	TCGA-DJ-A3VK-10A	'--	'--	'--	'--	'--	374	'--	'--	'--	'--	'--	'--	'--	'--	FALSE	'--	'--	false	'--	'--	'--	Blood Derived Normal	10	'--	released	'--	'--	'--	Not Reported	'--	'--	'--
TCGA-THCA	94443df0-7f16-4178-9e66-bee82f6ca33a	TCGA-DJ-A3VK	967c4b1a-3a7b-463e-8148-93f946d512dc	TCGA-DJ-A3VK-01Z	'--	'--	'--	'--	'--	'--	0	'--	'--	'--	'--	'--	'--	'--	TRUE	'--	'--	No	'--	'--	FFPE	Primary Tumor	1	'--	released	'--	'--	'--	Not Reported	'--	'--	'--
TCGA-THCA	94443df0-7f16-4178-9e66-bee82f6ca33a	TCGA-DJ-A3VK	f99e9fa1-2e21-4438-94df-0d03cdedd443	TCGA-DJ-A3VK-01A	'--	'--	'--	'--	'--	374	'--	'--	'--	'--	'--	'--	120.0	'--	FALSE	'--	'--	true	'--	08906F4D-8930-4EAA-B9A6-1C5A7DB6E62B	'--	Primary Tumor	1	'--	released	'--	'--	'--	Not Reported	'--	'--	'--
TCGA-THCA	7f9fad75-ac3e-4580-b949-80eed07a3230	TCGA-DE-A69K	5feb200f-13fb-4a2f-9b21-7ef8dd3bb9ed	TCGA-DE-A69K-01A	'--	'--	'--	'--	'--	72	'--	'--	'--	'--	'--	'--	330.0	'--	FALSE	'--	'--	false	'--	4AD8C17F-1301-4FF4-9B71-257AEFDE5484	'--	Primary Tumor	1	'--	released	'--	'--	'--	Not Reported	'--	'--	'--
TCGA-THCA	7f9fad75-ac3e-4580-b949-80eed07a3230	TCGA-DE-A69K	3e65b4d0-3992-4a2d-9c1b-5a6c6213629e	TCGA-DE-A69K-01Z	'--	'--	'--	'--	'--	'--	0	'--	'--	'--	'--	'--	'--	'--	TRUE	'--	'--	No	'--	'--	FFPE	Primary Tumor	1	'--	released	'--	'--	'--	Not Reported	'--	'--	'--
TCGA-THCA	7f9fad75-ac3e-4580-b949-80eed07a3230	TCGA-DE-A69K	1e4d6a3f-84ea-47b2-b3de-4eaf322178e4	TCGA-DE-A69K-10A	'--	'--	'--	'--	'--	72	'--	'--	'--	'--	'--	'--	'--	'--	FALSE	'--	'--	false	'--	'--	'--	Blood Derived Normal	10	'--	released	'--	'--	'--	Not Reported	'--	'--	'--
TCGA-THCA	646d1585-2d12-483c-8425-77d5451b2869	TCGA-EM-A4FV	dccba82e-784e-495f-bce5-97883626524e	TCGA-EM-A4FV-01Z	'--	'--	'--	'--	'--	'--	0	'--	'--	'--	'--	'--	'--	'--	TRUE	'--	'--	No	'--	'--	FFPE	Primary Tumor	1	'--	released	'--	'--	'--	Not Reported	'--	'--	'--
TCGA-THCA	646d1585-2d12-483c-8425-77d5451b2869	TCGA-EM-A4FV	dc728a27-ba50-4c12-ae08-75cceb4abf1a	TCGA-EM-A4FV-10A	'--	'--	'--	'--	'--	337	'--	'--	'--	'--	'--	'--	'--	'--	FALSE	'--	'--	false	'--	'--	'--	Blood Derived Normal	10	'--	released	'--	'--	'--	Not Reported	'--	'--	'--
TCGA-THCA	646d1585-2d12-483c-8425-77d5451b2869	TCGA-EM-A4FV	1bf49e38-fafd-40f2-897c-32afa62ec561	TCGA-EM-A4FV-01A	'--	'--	'--	'--	'--	337	'--	'--	'--	'--	'--	'--	60.0	'--	FALSE	'--	'--	false	'--	3065BB69-9440-4CB2-B0E3-186619499DF0	'--	Primary Tumor	1	'--	released	'--	'--	'--	Not Reported	'--	'--	'--
TCGA-THCA	f9deeda6-8f81-441a-9c47-24c2eefd049a	TCGA-EL-A3H8	9df5f26b-c674-4a63-bd89-48a3ed60ab93	TCGA-EL-A3H8-10A	'--	'--	'--	'--	'--	3556	'--	'--	'--	'--	'--	'--	'--	'--	FALSE	'--	'--	false	'--	'--	'--	Blood Derived Normal	10	'--	released	'--	'--	'--	Not Reported	'--	'--	'--
TCGA-THCA	f9deeda6-8f81-441a-9c47-24c2eefd049a	TCGA-EL-A3H8	7a6e571f-7673-4f5e-bbb0-826cd5116a29	TCGA-EL-A3H8-01A	'--	'--	'--	'--	'--	3556	'--	'--	'--	'--	'--	'--	220.0	'--	FALSE	'--	'--	false	'--	62BDE4A8-A9F1-4CB5-9633-5F7C048F9845	'--	Primary Tumor	1	'--	released	'--	'--	'--	Not Reported	'--	'--	'--
TCGA-THCA	f9deeda6-8f81-441a-9c47-24c2eefd049a	TCGA-EL-A3H8	5c10067a-3042-478e-8632-578a74369813	TCGA-EL-A3H8-01Z	'--	'--	'--	'--	'--	'--	0	'--	'--	'--	'--	'--	'--	'--	TRUE	'--	'--	No	'--	'--	FFPE	Primary Tumor	1	'--	released	'--	'--	'--	Not Reported	'--	'--	'--
TCGA-THCA	a7030d2b-2cc0-46be-9721-dc210954bee0	TCGA-DJ-A3VF	b7107e6c-7074-4e8f-a518-3929c9a5e515	TCGA-DJ-A3VF-01Z	'--	'--	'--	'--	'--	'--	0	'--	'--	'--	'--	'--	'--	'--	TRUE	'--	'--	No	'--	'--	FFPE	Primary Tumor	1	'--	released	'--	'--	'--	Not Reported	'--	'--	'--
TCGA-THCA	a7030d2b-2cc0-46be-9721-dc210954bee0	TCGA-DJ-A3VF	cff3e084-030d-4ec5-ae88-85d50fb624c9	TCGA-DJ-A3VF-10A	'--	'--	'--	'--	'--	134	'--	'--	'--	'--	'--	'--	'--	'--	FALSE	'--	'--	false	'--	'--	'--	Blood Derived Normal	10	'--	released	'--	'--	'--	Not Reported	'--	'--	'--
TCGA-THCA	a7030d2b-2cc0-46be-9721-dc210954bee0	TCGA-DJ-A3VF	54552917-03bd-4dd2-831b-cc15d02ff3cc	TCGA-DJ-A3VF-01A	'--	'--	'--	'--	'--	134	'--	'--	'--	'--	'--	'--	30.0	'--	FALSE	'--	'--	true	'--	8E171469-48B5-4A71-A2B0-72F743711E36	'--	Primary Tumor	1	'--	released	'--	'--	'--	Not Reported	'--	'--	'--
TCGA-THCA	c6f08366-f30d-45bd-b949-b59d2493995d	TCGA-FY-A3BL	f7eb50ed-523c-4c1d-b9a7-c4a54a27b526	TCGA-FY-A3BL-10A	'--	'--	'--	'--	'--	92	'--	'--	'--	'--	'--	'--	'--	'--	FALSE	'--	'--	false	'--	'--	'--	Blood Derived Normal	10	'--	released	'--	'--	'--	Not Reported	'--	'--	'--
TCGA-THCA	c6f08366-f30d-45bd-b949-b59d2493995d	TCGA-FY-A3BL	b925aa77-d58d-48fa-8466-b919a7b5e232	TCGA-FY-A3BL-01Z	'--	'--	'--	'--	'--	'--	0	'--	'--	'--	'--	'--	'--	'--	TRUE	'--	'--	No	'--	'--	FFPE	Primary Tumor	1	'--	released	'--	'--	'--	Not Reported	'--	'--	'--
TCGA-THCA	c6f08366-f30d-45bd-b949-b59d2493995d	TCGA-FY-A3BL	2429f318-bd68-4483-a762-ed697cbf14b6	TCGA-FY-A3BL-01A	'--	'--	'--	'--	'--	92	'--	'--	'--	'--	'--	'--	110.0	'--	FALSE	'--	'--	false	'--	410839D6-B990-415C-A2C8-2AAC60C02E9B	'--	Primary Tumor	1	'--	released	'--	'--	'--	Not Reported	'--	'--	'--
TCGA-THCA	d2a8035c-a8d3-4038-8a9d-854f2208bc45	TCGA-IM-A3ED	6b68dbc3-0478-4e8e-a6c7-dd97d82cafad	TCGA-IM-A3ED-10A	'--	'--	'--	'--	'--	1106	'--	'--	'--	'--	'--	'--	'--	'--	FALSE	'--	'--	false	'--	'--	'--	Blood Derived Normal	10	'--	released	'--	'--	'--	Not Reported	'--	'--	'--
TCGA-THCA	d2a8035c-a8d3-4038-8a9d-854f2208bc45	TCGA-IM-A3ED	6ac560e0-1d63-4f6b-b0a0-9c81b8150596	TCGA-IM-A3ED-01A	'--	'--	'--	'--	'--	1106	'--	'--	'--	'--	'--	'--	90.0	'--	FALSE	'--	'--	true	'--	0B417B72-0AD2-4B67-ADB3-E6156572D787	'--	Primary Tumor	1	'--	released	'--	'--	'--	Not Reported	'--	'--	'--
TCGA-THCA	d2a8035c-a8d3-4038-8a9d-854f2208bc45	TCGA-IM-A3ED	a002a00c-84b7-4716-95db-bde6047831b3	TCGA-IM-A3ED-01Z	'--	'--	'--	'--	'--	'--	0	'--	'--	'--	'--	'--	'--	'--	TRUE	'--	'--	No	'--	'--	FFPE	Primary Tumor	1	'--	released	'--	'--	'--	Not Reported	'--	'--	'--
TCGA-THCA	99ef2fec-5a3c-4e42-8f78-7eaf9877e26d	TCGA-DJ-A1QQ	3bbbc8d3-799a-4d4e-a43c-e7a8b449492a	TCGA-DJ-A1QQ-10A	'--	'--	'--	'--	'--	176	'--	'--	'--	'--	'--	'--	'--	'--	FALSE	'--	'--	false	'--	'--	'--	Blood Derived Normal	10	'--	released	'--	'--	'--	Not Reported	'--	'--	'--
TCGA-THCA	99ef2fec-5a3c-4e42-8f78-7eaf9877e26d	TCGA-DJ-A1QQ	c1162ce8-c76b-4e95-b44c-067066e1e89e	TCGA-DJ-A1QQ-01Z	'--	'--	'--	'--	'--	'--	0	'--	'--	'--	'--	'--	'--	'--	TRUE	'--	'--	No	'--	'--	FFPE	Primary Tumor	1	'--	released	'--	'--	'--	Not Reported	'--	'--	'--
TCGA-THCA	99ef2fec-5a3c-4e42-8f78-7eaf9877e26d	TCGA-DJ-A1QQ	64d1f58a-986f-4d4b-962e-da59a48c988b	TCGA-DJ-A1QQ-01A	'--	'--	'--	'--	'--	176	'--	'--	'--	'--	'--	'--	70.0	'--	FALSE	'--	'--	true	'--	692F9D3F-844B-45B5-9E10-4BEEC1FB93C8	'--	Primary Tumor	1	'--	released	'--	'--	'--	Not Reported	'--	'--	'--
TCGA-THCA	8cfb88f6-7b37-4f1e-882b-3a368b604167	TCGA-BJ-A45K	dc791fcc-d297-46c1-98fd-86485665c685	TCGA-BJ-A45K-01Z	'--	'--	'--	'--	'--	'--	0	'--	'--	'--	'--	'--	'--	'--	TRUE	'--	'--	No	'--	'--	FFPE	Primary Tumor	1	'--	released	'--	'--	'--	Not Reported	'--	'--	'--
TCGA-THCA	8cfb88f6-7b37-4f1e-882b-3a368b604167	TCGA-BJ-A45K	29b4816d-4cfb-45f0-bcd2-6b948245f3a4	TCGA-BJ-A45K-01A	'--	'--	'--	'--	'--	126	'--	'--	'--	'--	'--	'--	230.0	'--	FALSE	'--	'--	true	'--	5EA7DDF0-DC3F-4E56-B978-42A211C721DA	'--	Primary Tumor	1	'--	released	'--	'--	'--	Not Reported	'--	'--	'--
TCGA-THCA	8cfb88f6-7b37-4f1e-882b-3a368b604167	TCGA-BJ-A45K	a6d2304f-f391-420c-b6e2-ea68bb871058	TCGA-BJ-A45K-10A	'--	'--	'--	'--	'--	126	'--	'--	'--	'--	'--	'--	'--	'--	FALSE	'--	'--	false	'--	'--	'--	Blood Derived Normal	10	'--	released	'--	'--	'--	Not Reported	'--	'--	'--
TCGA-THCA	8cfb88f6-7b37-4f1e-882b-3a368b604167	TCGA-BJ-A45K	f9b08d10-4ec4-496b-af85-445d4d983d0f	TCGA-BJ-A45K-11A	'--	'--	'--	'--	'--	126	'--	'--	'--	'--	'--	'--	450.0	'--	FALSE	'--	'--	true	'--	'--	'--	Solid Tissue Normal	11	'--	released	'--	'--	'--	Not Reported	'--	'--	'--
TCGA-THCA	b555b7a4-6324-4d3e-9eed-b140af6c768a	TCGA-L6-A4EU	e97cf80b-3c50-4bdf-85ee-147534ec4b2f	TCGA-L6-A4EU-01Z	'--	'--	'--	'--	'--	'--	0	'--	'--	'--	'--	'--	'--	'--	TRUE	'--	'--	No	'--	'--	FFPE	Primary Tumor	1	'--	released	'--	'--	'--	Not Reported	'--	'--	'--
TCGA-THCA	b555b7a4-6324-4d3e-9eed-b140af6c768a	TCGA-L6-A4EU	4409e507-19d4-4eed-b54a-ff8ddd7f71d1	TCGA-L6-A4EU-01A	'--	'--	'--	'--	'--	88	'--	'--	'--	'--	'--	'--	130.0	'--	FALSE	'--	'--	true	'--	F67DA6D7-9692-4400-A5C6-D7D234FC36F7	'--	Primary Tumor	1	'--	released	'--	'--	'--	Not Reported	'--	'--	'--
TCGA-THCA	b555b7a4-6324-4d3e-9eed-b140af6c768a	TCGA-L6-A4EU	a8b385b7-5fd6-4e70-b015-7b02312e0d3f	TCGA-L6-A4EU-10A	'--	'--	'--	'--	'--	88	'--	'--	'--	'--	'--	'--	'--	'--	FALSE	'--	'--	true	'--	'--	'--	Blood Derived Normal	10	'--	released	'--	'--	'--	Not Reported	'--	'--	'--
TCGA-THCA	169f045f-1739-4b0b-9bdc-028aaca420f8	TCGA-DO-A1JZ	e85615f8-007a-4bf9-bd95-dc75a3d544a7	TCGA-DO-A1JZ-10A	'--	'--	'--	'--	'--	1386	'--	'--	'--	'--	'--	'--	'--	'--	FALSE	'--	'--	false	'--	'--	'--	Blood Derived Normal	10	'--	released	'--	'--	'--	Not Reported	'--	'--	'--
TCGA-THCA	169f045f-1739-4b0b-9bdc-028aaca420f8	TCGA-DO-A1JZ	36232f2e-9da5-42d2-90f2-3d1589133229	TCGA-DO-A1JZ-11A	'--	'--	'--	'--	'--	1386	'--	'--	'--	'--	'--	'--	140.0	'--	FALSE	'--	'--	false	'--	'--	'--	Solid Tissue Normal	11	'--	released	'--	'--	'--	Not Reported	'--	'--	'--
TCGA-THCA	169f045f-1739-4b0b-9bdc-028aaca420f8	TCGA-DO-A1JZ	2eeb72cd-8a11-4ed1-87b0-3cf0c1bf1fb5	TCGA-DO-A1JZ-01A	'--	'--	'--	'--	'--	1386	'--	'--	'--	'--	'--	'--	90.0	'--	FALSE	'--	'--	false	'--	E7412EA8-CEE7-4EA9-932F-33751A312E4B	'--	Primary Tumor	1	'--	released	'--	'--	'--	Not Reported	'--	'--	'--
TCGA-THCA	169f045f-1739-4b0b-9bdc-028aaca420f8	TCGA-DO-A1JZ	5b8c6243-6d9d-4a26-9713-8ee012d81184	TCGA-DO-A1JZ-01Z	'--	'--	'--	'--	'--	'--	0	'--	'--	'--	'--	'--	'--	'--	TRUE	'--	'--	No	'--	'--	FFPE	Primary Tumor	1	'--	released	'--	'--	'--	Not Reported	'--	'--	'--
TCGA-THCA	e8f56d0f-eee4-4def-a43a-dec91f4382a1	TCGA-EM-A3AQ	e84f9fa2-e742-448b-9890-b4692e19ceae	TCGA-EM-A3AQ-10A	'--	'--	'--	'--	'--	185	'--	'--	'--	'--	'--	'--	'--	'--	FALSE	'--	'--	false	'--	'--	'--	Blood Derived Normal	10	'--	released	'--	'--	'--	Not Reported	'--	'--	'--
TCGA-THCA	e8f56d0f-eee4-4def-a43a-dec91f4382a1	TCGA-EM-A3AQ	96a5582b-d127-4695-8ef2-4c29a89d06ce	TCGA-EM-A3AQ-01Z	'--	'--	'--	'--	'--	'--	0	'--	'--	'--	'--	'--	'--	'--	TRUE	'--	'--	No	'--	'--	FFPE	Primary Tumor	1	'--	released	'--	'--	'--	Not Reported	'--	'--	'--
TCGA-THCA	e8f56d0f-eee4-4def-a43a-dec91f4382a1	TCGA-EM-A3AQ	e13c3f11-913d-4371-9a7d-5e4df15fb42a	TCGA-EM-A3AQ-01A	'--	'--	'--	'--	'--	128	'--	'--	'--	'--	'--	'--	50.0	'--	FALSE	'--	'--	false	'--	2925FDE2-F80E-4B19-A634-F7A5A341A69A	'--	Primary Tumor	1	'--	released	'--	'--	'--	Not Reported	'--	'--	'--
TCGA-THCA	541406fa-4443-4094-a303-43913d96f016	TCGA-IM-A41Y	e9146ee8-b0a4-46ae-bf1e-73b258667eab	TCGA-IM-A41Y-01Z	'--	'--	'--	'--	'--	'--	0	'--	'--	'--	'--	'--	'--	'--	TRUE	'--	'--	No	'--	'--	FFPE	Primary Tumor	1	'--	released	'--	'--	'--	Not Reported	'--	'--	'--
TCGA-THCA	541406fa-4443-4094-a303-43913d96f016	TCGA-IM-A41Y	175cdd49-7025-4691-a9d1-41d1d85a91bc	TCGA-IM-A41Y-10A	'--	'--	'--	'--	'--	90	'--	'--	'--	'--	'--	'--	'--	'--	FALSE	'--	'--	false	'--	'--	'--	Blood Derived Normal	10	'--	released	'--	'--	'--	Not Reported	'--	'--	'--
TCGA-THCA	541406fa-4443-4094-a303-43913d96f016	TCGA-IM-A41Y	011c5f57-fa08-46bd-9e48-88c51b118c2d	TCGA-IM-A41Y-01A	'--	'--	'--	'--	'--	90	'--	'--	'--	'--	'--	'--	90.0	'--	FALSE	'--	'--	true	'--	F8C456B1-F094-4661-86D2-E66F1C0BEE6D	'--	Primary Tumor	1	'--	released	'--	'--	'--	Not Reported	'--	'--	'--
TCGA-THCA	f3665b89-957b-4d7b-b67f-39615c47d28b	TCGA-E8-A3X7	1f3a581d-ad26-4d99-a402-354a822353ae	TCGA-E8-A3X7-10A	'--	'--	'--	'--	'--	148	'--	'--	'--	'--	'--	'--	'--	'--	FALSE	'--	'--	false	'--	'--	'--	Blood Derived Normal	10	'--	released	'--	'--	'--	Not Reported	'--	'--	'--
TCGA-THCA	f3665b89-957b-4d7b-b67f-39615c47d28b	TCGA-E8-A3X7	3bab28aa-fd05-419c-9caf-b3c7543a7690	TCGA-E8-A3X7-01A	'--	'--	'--	'--	'--	148	'--	'--	'--	'--	'--	'--	200.0	'--	FALSE	'--	'--	true	'--	045AB42B-1C1B-4144-8038-9AE04F9339AC	'--	Primary Tumor	1	'--	released	'--	'--	'--	Not Reported	'--	'--	'--
TCGA-THCA	f3665b89-957b-4d7b-b67f-39615c47d28b	TCGA-E8-A3X7	44b47ee3-a391-439b-a45c-c5a9eccf7692	TCGA-E8-A3X7-01Z	'--	'--	'--	'--	'--	'--	0	'--	'--	'--	'--	'--	'--	'--	TRUE	'--	'--	No	'--	'--	FFPE	Primary Tumor	1	'--	released	'--	'--	'--	Not Reported	'--	'--	'--
TCGA-THCA	e0ab95ef-5c96-4d00-8950-04e26e3b4672	TCGA-EM-A4FO	fe22912f-8ce9-4ed3-91e1-a7d82126aeb7	TCGA-EM-A4FO-01Z	'--	'--	'--	'--	'--	'--	0	'--	'--	'--	'--	'--	'--	'--	TRUE	'--	'--	No	'--	'--	FFPE	Primary Tumor	1	'--	released	'--	'--	'--	Not Reported	'--	'--	'--
TCGA-THCA	e0ab95ef-5c96-4d00-8950-04e26e3b4672	TCGA-EM-A4FO	fdc8d5c5-a5b7-4199-b535-9a1e8685fb22	TCGA-EM-A4FO-01A	'--	'--	'--	'--	'--	234	'--	'--	'--	'--	'--	'--	60.0	'--	FALSE	'--	'--	false	'--	91A90308-307B-4AF2-98F3-AFFF5153C248	'--	Primary Tumor	1	'--	released	'--	'--	'--	Not Reported	'--	'--	'--
TCGA-THCA	e0ab95ef-5c96-4d00-8950-04e26e3b4672	TCGA-EM-A4FO	2ee35668-7ede-4521-acdb-81c27d4ef7e5	TCGA-EM-A4FO-10A	'--	'--	'--	'--	'--	234	'--	'--	'--	'--	'--	'--	'--	'--	FALSE	'--	'--	false	'--	'--	'--	Blood Derived Normal	10	'--	released	'--	'--	'--	Not Reported	'--	'--	'--
TCGA-THCA	c042a639-63c6-471b-a7c5-3fb4e12c4d12	TCGA-DJ-A3VG	9f6a3bcc-c613-4f26-956c-0efcd9312949	TCGA-DJ-A3VG-01Z	'--	'--	'--	'--	'--	'--	0	'--	'--	'--	'--	'--	'--	'--	TRUE	'--	'--	No	'--	'--	FFPE	Primary Tumor	1	'--	released	'--	'--	'--	Not Reported	'--	'--	'--
TCGA-THCA	c042a639-63c6-471b-a7c5-3fb4e12c4d12	TCGA-DJ-A3VG	6d934024-bfad-4dad-bce6-8ff9776b4d54	TCGA-DJ-A3VG-10A	'--	'--	'--	'--	'--	591	'--	'--	'--	'--	'--	'--	'--	'--	FALSE	'--	'--	false	'--	'--	'--	Blood Derived Normal	10	'--	released	'--	'--	'--	Not Reported	'--	'--	'--
TCGA-THCA	c042a639-63c6-471b-a7c5-3fb4e12c4d12	TCGA-DJ-A3VG	14c89f9b-f35f-4410-bf1e-cb91091ec7d0	TCGA-DJ-A3VG-01A	'--	'--	'--	'--	'--	591	'--	'--	'--	'--	'--	'--	60.0	'--	FALSE	'--	'--	true	'--	5810F25F-31D6-4A52-9569-57AD6E4153DF	'--	Primary Tumor	1	'--	released	'--	'--	'--	Not Reported	'--	'--	'--
TCGA-THCA	2cae34a6-73a0-4a67-8dcc-051468c41389	TCGA-ET-A40T	1487564e-8ef4-4ba3-8bca-256a188d8e55	TCGA-ET-A40T-01Z	'--	'--	'--	'--	'--	'--	0	'--	'--	'--	'--	'--	'--	'--	TRUE	'--	'--	No	'--	'--	FFPE	Primary Tumor	1	'--	released	'--	'--	'--	Not Reported	'--	'--	'--
TCGA-THCA	2cae34a6-73a0-4a67-8dcc-051468c41389	TCGA-ET-A40T	5f0c86fc-d329-46bb-bffc-2ddee7cda9cc	TCGA-ET-A40T-10A	'--	'--	'--	'--	'--	156	'--	'--	'--	'--	'--	'--	'--	'--	FALSE	'--	'--	false	'--	'--	'--	Blood Derived Normal	10	'--	released	'--	'--	'--	Not Reported	'--	'--	'--
TCGA-THCA	2cae34a6-73a0-4a67-8dcc-051468c41389	TCGA-ET-A40T	2d7ff8ff-de00-4c54-8096-46a2dc0729e4	TCGA-ET-A40T-01A	'--	'--	'--	'--	'--	156	'--	'--	'--	'--	'--	'--	80.0	'--	FALSE	'--	'--	true	'--	32BD1BDE-E814-4CEC-8986-F3C60C43FCD4	'--	Primary Tumor	1	'--	released	'--	'--	'--	Not Reported	'--	'--	'--
TCGA-THCA	ba9dec81-ffc0-453a-9621-94beba45fab1	TCGA-DJ-A13M	ca0a1b87-487b-4214-9efa-e9c6ac46ea9a	TCGA-DJ-A13M-10A	'--	'--	'--	'--	'--	126	'--	'--	'--	'--	'--	'--	'--	'--	FALSE	'--	'--	false	'--	'--	'--	Blood Derived Normal	10	'--	released	'--	'--	'--	Not Reported	'--	'--	'--
TCGA-THCA	ba9dec81-ffc0-453a-9621-94beba45fab1	TCGA-DJ-A13M	aabde59a-6de1-4105-ba43-ebbbf28df241	TCGA-DJ-A13M-01Z	'--	'--	'--	'--	'--	'--	0	'--	'--	'--	'--	'--	'--	'--	TRUE	'--	'--	No	'--	'--	FFPE	Primary Tumor	1	'--	released	'--	'--	'--	Not Reported	'--	'--	'--
TCGA-THCA	ba9dec81-ffc0-453a-9621-94beba45fab1	TCGA-DJ-A13M	28913c64-8637-4537-af8c-7315097a5ad1	TCGA-DJ-A13M-01A	'--	'--	'--	'--	'--	126	'--	'--	'--	'--	'--	'--	510.0	'--	FALSE	'--	'--	true	'--	F7271934-A7FC-4BF5-A45A-5296AD308007	'--	Primary Tumor	1	'--	released	'--	'--	'--	Not Reported	'--	'--	'--
TCGA-THCA	a3f87411-0a7b-4415-ba17-8edcc2639f6c	TCGA-EL-A4K2	2eba8b5d-24a9-4b18-87d2-32de38c9bbe3	TCGA-EL-A4K2-01A	'--	'--	'--	'--	'--	708	'--	'--	'--	'--	'--	'--	240.0	'--	FALSE	'--	'--	false	'--	F7DCEAA1-8E7C-44CA-8537-3F2706AE1068	'--	Primary Tumor	1	'--	released	'--	'--	'--	Not Reported	'--	'--	'--
TCGA-THCA	a3f87411-0a7b-4415-ba17-8edcc2639f6c	TCGA-EL-A4K2	378f2174-7799-4091-bc0f-b44647844f0e	TCGA-EL-A4K2-11A	'--	'--	'--	'--	'--	708	'--	'--	'--	'--	'--	'--	200.0	'--	FALSE	'--	'--	false	'--	'--	'--	Solid Tissue Normal	11	'--	released	'--	'--	'--	Not Reported	'--	'--	'--
TCGA-THCA	a3f87411-0a7b-4415-ba17-8edcc2639f6c	TCGA-EL-A4K2	72dcde96-afdf-4efe-873e-9d6dfb4e2a6f	TCGA-EL-A4K2-01Z	'--	'--	'--	'--	'--	'--	0	'--	'--	'--	'--	'--	'--	'--	TRUE	'--	'--	No	'--	'--	FFPE	Primary Tumor	1	'--	released	'--	'--	'--	Not Reported	'--	'--	'--
TCGA-THCA	471636d5-9eca-49df-872a-c2a2cac61838	TCGA-EL-A3CN	cd834fe0-00d5-431c-b8a4-cdc1ec3e1387	TCGA-EL-A3CN-01A	'--	'--	'--	'--	'--	4586	'--	'--	'--	'--	'--	'--	210.0	'--	FALSE	'--	'--	true	'--	CF43F52C-E738-49CA-A3C5-33BC3E183867	'--	Primary Tumor	1	'--	released	'--	'--	'--	Not Reported	'--	'--	'--
TCGA-THCA	471636d5-9eca-49df-872a-c2a2cac61838	TCGA-EL-A3CN	ce7159ba-e43b-49ab-a1cd-33d33bfb2f3b	TCGA-EL-A3CN-10A	'--	'--	'--	'--	'--	4586	'--	'--	'--	'--	'--	'--	'--	'--	FALSE	'--	'--	false	'--	'--	'--	Blood Derived Normal	10	'--	released	'--	'--	'--	Not Reported	'--	'--	'--
TCGA-THCA	471636d5-9eca-49df-872a-c2a2cac61838	TCGA-EL-A3CN	42c98146-befe-4261-91ef-8f622c7a6260	TCGA-EL-A3CN-01Z	'--	'--	'--	'--	'--	'--	0	'--	'--	'--	'--	'--	'--	'--	TRUE	'--	'--	No	'--	'--	FFPE	Primary Tumor	1	'--	released	'--	'--	'--	Not Reported	'--	'--	'--
TCGA-THCA	b3b7d701-ec84-4018-a3ce-f59198b35767	TCGA-FY-A3NN	d60a60d0-3dbb-435d-9ce6-e5f35f2a465f	TCGA-FY-A3NN-01A	'--	'--	'--	'--	'--	56	'--	'--	'--	'--	'--	'--	13.0	'--	FALSE	'--	'--	false	'--	A0DC1BD5-245E-48D2-9BE9-9EABD30C19C5	'--	Primary Tumor	1	'--	released	'--	'--	'--	Not Reported	'--	'--	'--
TCGA-THCA	b3b7d701-ec84-4018-a3ce-f59198b35767	TCGA-FY-A3NN	bcda273b-6e57-4251-9887-28c56ad48351	TCGA-FY-A3NN-01Z	'--	'--	'--	'--	'--	'--	0	'--	'--	'--	'--	'--	'--	'--	TRUE	'--	'--	No	'--	'--	FFPE	Primary Tumor	1	'--	released	'--	'--	'--	Not Reported	'--	'--	'--
TCGA-THCA	b3b7d701-ec84-4018-a3ce-f59198b35767	TCGA-FY-A3NN	c869234d-4492-4b23-8ea7-84e46f9841bd	TCGA-FY-A3NN-10A	'--	'--	'--	'--	'--	56	'--	'--	'--	'--	'--	'--	'--	'--	FALSE	'--	'--	false	'--	'--	'--	Blood Derived Normal	10	'--	released	'--	'--	'--	Not Reported	'--	'--	'--
TCGA-THCA	d4355111-3abb-40f0-bdb7-b9eaa39dc771	TCGA-EL-A3TA	8424b1f6-c75e-4403-b2bf-c670b9e935c9	TCGA-EL-A3TA-01A	'--	'--	'--	'--	'--	2457	'--	'--	'--	'--	'--	'--	270.0	'--	FALSE	'--	'--	true	'--	784D0924-C38E-4C85-914B-B7F123F3E3C5	'--	Primary Tumor	1	'--	released	'--	'--	'--	Not Reported	'--	'--	'--
TCGA-THCA	d4355111-3abb-40f0-bdb7-b9eaa39dc771	TCGA-EL-A3TA	28a69b75-c8a3-4cb0-a08c-ceba42fb8ced	TCGA-EL-A3TA-11A	'--	'--	'--	'--	'--	2457	'--	'--	'--	'--	'--	'--	230.0	'--	FALSE	'--	'--	true	'--	'--	'--	Solid Tissue Normal	11	'--	released	'--	'--	'--	Not Reported	'--	'--	'--
TCGA-THCA	d4355111-3abb-40f0-bdb7-b9eaa39dc771	TCGA-EL-A3TA	4bacdb96-ebac-4925-99de-fe911b7f8c19	TCGA-EL-A3TA-01Z	'--	'--	'--	'--	'--	'--	0	'--	'--	'--	'--	'--	'--	'--	TRUE	'--	'--	No	'--	'--	FFPE	Primary Tumor	1	'--	released	'--	'--	'--	Not Reported	'--	'--	'--
TCGA-THCA	b1d71782-2443-43f3-bd0e-8b7220515cb6	TCGA-FE-A230	8be4cbfe-c966-4420-9e75-57f4268d8009	TCGA-FE-A230-01Z	'--	'--	'--	'--	'--	'--	0	'--	'--	'--	'--	'--	'--	'--	TRUE	'--	'--	No	'--	'--	FFPE	Primary Tumor	1	'--	released	'--	'--	'--	Not Reported	'--	'--	'--
TCGA-THCA	b1d71782-2443-43f3-bd0e-8b7220515cb6	TCGA-FE-A230	12fc3f30-08fb-47c6-92f1-009d961c1e94	TCGA-FE-A230-01A	'--	'--	'--	'--	'--	1669	'--	'--	'--	'--	'--	'--	110.0	'--	FALSE	'--	'--	false	'--	376056EE-C698-481C-8B30-4489F3C75D58	'--	Primary Tumor	1	'--	released	'--	'--	'--	Not Reported	'--	'--	'--
TCGA-THCA	b1d71782-2443-43f3-bd0e-8b7220515cb6	TCGA-FE-A230	33613a27-3e77-4ed8-ab5f-a9de98431149	TCGA-FE-A230-10A	'--	'--	'--	'--	'--	1681	'--	'--	'--	'--	'--	'--	'--	'--	FALSE	'--	'--	false	'--	'--	'--	Blood Derived Normal	10	'--	released	'--	'--	'--	Not Reported	'--	'--	'--
TCGA-THCA	9b1dbd0d-be6d-4a88-881a-faf57ceba81c	TCGA-CE-A485	e5c41b6a-8463-4e22-8e79-4e38c72a6730	TCGA-CE-A485-10A	'--	'--	'--	'--	'--	132	'--	'--	'--	'--	'--	'--	'--	'--	FALSE	'--	'--	false	'--	'--	'--	Blood Derived Normal	10	'--	released	'--	'--	'--	Not Reported	'--	'--	'--
TCGA-THCA	9b1dbd0d-be6d-4a88-881a-faf57ceba81c	TCGA-CE-A485	b582505d-7828-4be4-ae6f-c0a00de8adb3	TCGA-CE-A485-01A	'--	'--	'--	'--	'--	132	'--	'--	'--	'--	'--	'--	410.0	'--	FALSE	'--	'--	true	'--	4F3E265C-5229-4336-B6CD-1DECF9BC6CF5	'--	Primary Tumor	1	'--	released	'--	'--	'--	Not Reported	'--	'--	'--
TCGA-THCA	9b1dbd0d-be6d-4a88-881a-faf57ceba81c	TCGA-CE-A485	99ae0f12-ff42-4926-97b6-a4576376cf92	TCGA-CE-A485-01Z	'--	'--	'--	'--	'--	'--	0	'--	'--	'--	'--	'--	'--	'--	TRUE	'--	'--	No	'--	'--	FFPE	Primary Tumor	1	'--	released	'--	'--	'--	Not Reported	'--	'--	'--
TCGA-THCA	dd1058c5-da32-4f60-9275-5e1a8049d9c5	TCGA-IM-A3U3	ab1f7db8-a2c6-4854-a0b0-e41652e7488c	TCGA-IM-A3U3-10A	'--	'--	'--	'--	'--	58	'--	'--	'--	'--	'--	'--	'--	'--	FALSE	'--	'--	false	'--	'--	'--	Blood Derived Normal	10	'--	released	'--	'--	'--	Not Reported	'--	'--	'--
TCGA-THCA	dd1058c5-da32-4f60-9275-5e1a8049d9c5	TCGA-IM-A3U3	eaa8031b-7895-475c-9851-d3abb116dbde	TCGA-IM-A3U3-01A	'--	'--	'--	'--	'--	58	'--	'--	'--	'--	'--	'--	40.0	'--	FALSE	'--	'--	true	'--	56E8B18F-9149-4B45-AF96-DFC3B9DAE916	'--	Primary Tumor	1	'--	released	'--	'--	'--	Not Reported	'--	'--	'--
TCGA-THCA	dd1058c5-da32-4f60-9275-5e1a8049d9c5	TCGA-IM-A3U3	2bd44eed-b95a-4850-905d-2d5ece274b83	TCGA-IM-A3U3-01Z	'--	'--	'--	'--	'--	'--	0	'--	'--	'--	'--	'--	'--	'--	TRUE	'--	'--	No	'--	'--	FFPE	Primary Tumor	1	'--	released	'--	'--	'--	Not Reported	'--	'--	'--
TCGA-THCA	8a476795-0e05-4da6-bbe1-ff7304da1b39	TCGA-EL-A3T2	e62c667d-e457-477e-89bd-e94bf1555cda	TCGA-EL-A3T2-11A	'--	'--	'--	'--	'--	3565	'--	'--	'--	'--	'--	'--	240.0	'--	FALSE	'--	'--	true	'--	'--	'--	Solid Tissue Normal	11	'--	released	'--	'--	'--	Not Reported	'--	'--	'--
TCGA-THCA	8a476795-0e05-4da6-bbe1-ff7304da1b39	TCGA-EL-A3T2	fc19234d-7e9c-4766-a3f0-bda4da16612c	TCGA-EL-A3T2-01Z	'--	'--	'--	'--	'--	'--	0	'--	'--	'--	'--	'--	'--	'--	TRUE	'--	'--	No	'--	'--	FFPE	Primary Tumor	1	'--	released	'--	'--	'--	Not Reported	'--	'--	'--
TCGA-THCA	8a476795-0e05-4da6-bbe1-ff7304da1b39	TCGA-EL-A3T2	ef77ee63-3605-4fdb-b0fa-a1077aa771b9	TCGA-EL-A3T2-01A	'--	'--	'--	'--	'--	3565	'--	'--	'--	'--	'--	'--	220.0	'--	FALSE	'--	'--	true	'--	8C7BD4A3-B00C-4D06-88B1-6C3164E36E99	'--	Primary Tumor	1	'--	released	'--	'--	'--	Not Reported	'--	'--	'--
TCGA-THCA	8e274b77-c05e-4a8c-a106-c552df1f2d11	TCGA-KS-A41F	2a07ad0d-1af5-433e-a2ed-1b5ee26975e7	TCGA-KS-A41F-01Z	'--	'--	'--	'--	'--	'--	0	'--	'--	'--	'--	'--	'--	'--	TRUE	'--	'--	No	'--	'--	FFPE	Primary Tumor	1	'--	released	'--	'--	'--	Not Reported	'--	'--	'--
TCGA-THCA	8e274b77-c05e-4a8c-a106-c552df1f2d11	TCGA-KS-A41F	f4689637-2390-48de-96fa-61cd2eda3242	TCGA-KS-A41F-11A	'--	'--	'--	'--	'--	3703	'--	'--	'--	'--	'--	'--	60.0	'--	FALSE	'--	'--	false	'--	'--	'--	Solid Tissue Normal	11	'--	released	'--	'--	'--	Not Reported	'--	'--	'--
TCGA-THCA	8e274b77-c05e-4a8c-a106-c552df1f2d11	TCGA-KS-A41F	637267d7-9aff-494e-9d51-c2651ef0681f	TCGA-KS-A41F-01A	'--	'--	'--	'--	'--	3703	'--	'--	'--	'--	'--	'--	130.0	'--	FALSE	'--	'--	false	'--	4EF861C5-0F5E-41D2-AB5A-F029E9E9F5D3	'--	Primary Tumor	1	'--	released	'--	'--	'--	Not Reported	'--	'--	'--
TCGA-THCA	edb90376-0ef9-47dd-be6f-a6e8a0380a9c	TCGA-DJ-A2PQ	2eb05e94-554e-402f-b319-1be9de36c66e	TCGA-DJ-A2PQ-01A	'--	'--	'--	'--	'--	223	'--	'--	'--	'--	'--	'--	680.0	'--	FALSE	'--	'--	true	'--	54BC5DC2-5750-4B60-AFA2-89018B799420	'--	Primary Tumor	1	'--	released	'--	'--	'--	Not Reported	'--	'--	'--
TCGA-THCA	edb90376-0ef9-47dd-be6f-a6e8a0380a9c	TCGA-DJ-A2PQ	b8083af5-8226-4028-91c1-eb9372da0c0e	TCGA-DJ-A2PQ-10A	'--	'--	'--	'--	'--	223	'--	'--	'--	'--	'--	'--	'--	'--	FALSE	'--	'--	false	'--	'--	'--	Blood Derived Normal	10	'--	released	'--	'--	'--	Not Reported	'--	'--	'--
TCGA-THCA	edb90376-0ef9-47dd-be6f-a6e8a0380a9c	TCGA-DJ-A2PQ	8b9d2d7d-c0fc-4b6e-8000-dac3f4c0266f	TCGA-DJ-A2PQ-01Z	'--	'--	'--	'--	'--	'--	0	'--	'--	'--	'--	'--	'--	'--	TRUE	'--	'--	No	'--	'--	FFPE	Primary Tumor	1	'--	released	'--	'--	'--	Not Reported	'--	'--	'--
TCGA-THCA	acb80b76-2394-4250-8687-60e40e16e83b	TCGA-DJ-A4UT	dcbc8e4a-3e82-45f3-bcb7-b55f12c0183d	TCGA-DJ-A4UT-10A	'--	'--	'--	'--	'--	222	'--	'--	'--	'--	'--	'--	'--	'--	FALSE	'--	'--	false	'--	'--	'--	Blood Derived Normal	10	'--	released	'--	'--	'--	Not Reported	'--	'--	'--
TCGA-THCA	acb80b76-2394-4250-8687-60e40e16e83b	TCGA-DJ-A4UT	3752767e-2c47-4444-afe2-33ad300426b8	TCGA-DJ-A4UT-01Z	'--	'--	'--	'--	'--	'--	0	'--	'--	'--	'--	'--	'--	'--	TRUE	'--	'--	No	'--	'--	FFPE	Primary Tumor	1	'--	released	'--	'--	'--	Not Reported	'--	'--	'--
TCGA-THCA	acb80b76-2394-4250-8687-60e40e16e83b	TCGA-DJ-A4UT	4d6855a8-076d-4f95-b6ce-2b250ce3087d	TCGA-DJ-A4UT-01A	'--	'--	'--	'--	'--	222	'--	'--	'--	'--	'--	'--	70.0	'--	FALSE	'--	'--	true	'--	02AD6E8E-1CEF-4BED-9236-B847EBF8513A	'--	Primary Tumor	1	'--	released	'--	'--	'--	Not Reported	'--	'--	'--
TCGA-THCA	2fa2dd09-593a-4cde-97c7-61cdb8ba2bfe	TCGA-EL-A3GZ	d7042c88-25ca-4ef7-9b42-435dc7368935	TCGA-EL-A3GZ-01A	'--	'--	'--	'--	'--	3741	'--	'--	'--	'--	'--	'--	200.0	'--	FALSE	'--	'--	false	'--	08E1BDE1-35B6-4F04-BEC1-D3FCC9A2A9CD	'--	Primary Tumor	1	'--	released	'--	'--	'--	Not Reported	'--	'--	'--
TCGA-THCA	2fa2dd09-593a-4cde-97c7-61cdb8ba2bfe	TCGA-EL-A3GZ	39c3153b-5c03-49c4-ae12-09d01f3babc4	TCGA-EL-A3GZ-11A	'--	'--	'--	'--	'--	3741	'--	'--	'--	'--	'--	'--	220.0	'--	FALSE	'--	'--	false	'--	'--	'--	Solid Tissue Normal	11	'--	released	'--	'--	'--	Not Reported	'--	'--	'--
TCGA-THCA	2fa2dd09-593a-4cde-97c7-61cdb8ba2bfe	TCGA-EL-A3GZ	0adbbeb5-9349-463b-a87c-794f5628d323	TCGA-EL-A3GZ-01Z	'--	'--	'--	'--	'--	'--	0	'--	'--	'--	'--	'--	'--	'--	TRUE	'--	'--	No	'--	'--	FFPE	Primary Tumor	1	'--	released	'--	'--	'--	Not Reported	'--	'--	'--
TCGA-THCA	fd661b1b-fe0b-4ab0-ae82-76324e2f6a81	TCGA-EL-A3CO	4fffebd3-2b38-47e6-bfaa-2252cfc67906	TCGA-EL-A3CO-10A	'--	'--	'--	'--	'--	4439	'--	'--	'--	'--	'--	'--	'--	'--	FALSE	'--	'--	false	'--	'--	'--	Blood Derived Normal	10	'--	released	'--	'--	'--	Not Reported	'--	'--	'--
TCGA-THCA	fd661b1b-fe0b-4ab0-ae82-76324e2f6a81	TCGA-EL-A3CO	349fd52b-a358-464c-b37e-5ba8df33ced0	TCGA-EL-A3CO-01A	'--	'--	'--	'--	'--	4439	'--	'--	'--	'--	'--	'--	220.0	'--	FALSE	'--	'--	true	'--	070A0EB6-F8C7-4F57-B655-137ED40B4A12	'--	Primary Tumor	1	'--	released	'--	'--	'--	Not Reported	'--	'--	'--
TCGA-THCA	fd661b1b-fe0b-4ab0-ae82-76324e2f6a81	TCGA-EL-A3CO	53d50b97-ca0a-4520-b34b-db684ba9843c	TCGA-EL-A3CO-01Z	'--	'--	'--	'--	'--	'--	0	'--	'--	'--	'--	'--	'--	'--	TRUE	'--	'--	No	'--	'--	FFPE	Primary Tumor	1	'--	released	'--	'--	'--	Not Reported	'--	'--	'--
TCGA-THCA	86d5865e-6a1c-467c-97c9-47460b77f5a4	TCGA-DJ-A4V5	8d1c5cf2-c21b-4ef6-921d-096dc6b00144	TCGA-DJ-A4V5-01A	'--	'--	'--	'--	'--	357	'--	'--	'--	'--	'--	'--	780.0	'--	FALSE	'--	'--	true	'--	E4745F67-4727-4DF5-826A-3CEA904ED623	'--	Primary Tumor	1	'--	released	'--	'--	'--	Not Reported	'--	'--	'--
TCGA-THCA	86d5865e-6a1c-467c-97c9-47460b77f5a4	TCGA-DJ-A4V5	f3d8cc30-8b78-4d76-b536-7d826472d7be	TCGA-DJ-A4V5-10A	'--	'--	'--	'--	'--	357	'--	'--	'--	'--	'--	'--	'--	'--	FALSE	'--	'--	false	'--	'--	'--	Blood Derived Normal	10	'--	released	'--	'--	'--	Not Reported	'--	'--	'--
TCGA-THCA	86d5865e-6a1c-467c-97c9-47460b77f5a4	TCGA-DJ-A4V5	4320748a-d385-4588-a53a-fcdcec0e54c1	TCGA-DJ-A4V5-01Z	'--	'--	'--	'--	'--	'--	0	'--	'--	'--	'--	'--	'--	'--	TRUE	'--	'--	No	'--	'--	FFPE	Primary Tumor	1	'--	released	'--	'--	'--	Not Reported	'--	'--	'--
TCGA-THCA	f0bc4f65-211b-4ae1-8e68-aaef3f3c6db8	TCGA-MK-A4N7	975e4fce-e7c3-4752-b01e-a5191f1141ff	TCGA-MK-A4N7-10A	'--	'--	'--	'--	'--	525	'--	'--	'--	'--	'--	'--	'--	'--	FALSE	'--	'--	false	'--	'--	'--	Blood Derived Normal	10	'--	released	'--	'--	'--	Not Reported	'--	'--	'--
TCGA-THCA	f0bc4f65-211b-4ae1-8e68-aaef3f3c6db8	TCGA-MK-A4N7	68dfd2fe-a179-42e4-9662-55c84555a063	TCGA-MK-A4N7-01A	'--	'--	'--	'--	'--	525	'--	'--	'--	'--	'--	'--	60.0	'--	FALSE	'--	'--	true	'--	B7266F91-4475-488E-B0B9-21716FED9805	'--	Primary Tumor	1	'--	released	'--	'--	'--	Not Reported	'--	'--	'--
TCGA-THCA	f0bc4f65-211b-4ae1-8e68-aaef3f3c6db8	TCGA-MK-A4N7	f4fb36cb-6975-4df6-93e2-f81c9d63239a	TCGA-MK-A4N7-01Z	'--	'--	'--	'--	'--	'--	0	'--	'--	'--	'--	'--	'--	'--	TRUE	'--	'--	No	'--	'--	FFPE	Primary Tumor	1	'--	released	'--	'--	'--	Not Reported	'--	'--	'--
TCGA-THCA	4e959d61-4f7f-4933-bada-d33a621d9c03	TCGA-EL-A3GQ	754d6b39-7412-402d-996d-54eea27df08a	TCGA-EL-A3GQ-01A	'--	'--	'--	'--	'--	596	'--	'--	'--	'--	'--	'--	230.0	'--	FALSE	'--	'--	false	'--	FB308CCC-CB34-4357-84FB-6EA680C7F9B9	'--	Primary Tumor	1	'--	released	'--	'--	'--	Not Reported	'--	'--	'--
TCGA-THCA	4e959d61-4f7f-4933-bada-d33a621d9c03	TCGA-EL-A3GQ	3bc1733b-d7b1-4891-b9a0-4294e5401806	TCGA-EL-A3GQ-10A	'--	'--	'--	'--	'--	596	'--	'--	'--	'--	'--	'--	'--	'--	FALSE	'--	'--	false	'--	'--	'--	Blood Derived Normal	10	'--	released	'--	'--	'--	Not Reported	'--	'--	'--
TCGA-THCA	4e959d61-4f7f-4933-bada-d33a621d9c03	TCGA-EL-A3GQ	2f556073-f505-4121-8d54-8c260bb7b03d	TCGA-EL-A3GQ-01Z	'--	'--	'--	'--	'--	'--	0	'--	'--	'--	'--	'--	'--	'--	TRUE	'--	'--	No	'--	'--	FFPE	Primary Tumor	1	'--	released	'--	'--	'--	Not Reported	'--	'--	'--
TCGA-THCA	a86ac3b5-b5e9-4420-8de0-a358fcad85b6	TCGA-FE-A3PC	cd642d87-a56c-4537-a0d2-bd29fc7aa3a2	TCGA-FE-A3PC-10A	'--	'--	'--	'--	'--	2198	'--	'--	'--	'--	'--	'--	'--	'--	FALSE	'--	'--	false	'--	'--	'--	Blood Derived Normal	10	'--	released	'--	'--	'--	Not Reported	'--	'--	'--
TCGA-THCA	a86ac3b5-b5e9-4420-8de0-a358fcad85b6	TCGA-FE-A3PC	7a5628ff-c5c2-4f25-809b-640415323477	TCGA-FE-A3PC-01A	'--	'--	'--	'--	'--	2198	'--	'--	'--	'--	'--	'--	120.0	'--	FALSE	'--	'--	true	'--	5811676B-2274-40D5-9CBA-36468ACAF6B5	'--	Primary Tumor	1	'--	released	'--	'--	'--	Not Reported	'--	'--	'--
TCGA-THCA	a86ac3b5-b5e9-4420-8de0-a358fcad85b6	TCGA-FE-A3PC	1b189064-043c-4109-84b2-c344739379e3	TCGA-FE-A3PC-01Z	'--	'--	'--	'--	'--	'--	0	'--	'--	'--	'--	'--	'--	'--	TRUE	'--	'--	No	'--	'--	FFPE	Primary Tumor	1	'--	released	'--	'--	'--	Not Reported	'--	'--	'--
TCGA-THCA	785803bb-42a8-4afb-b7b4-58c114894408	TCGA-FK-A3S3	4af9827a-e13e-4130-b897-c6a3230335e8	TCGA-FK-A3S3-10A	'--	'--	'--	'--	'--	1282	'--	'--	'--	'--	'--	'--	'--	'--	FALSE	'--	'--	false	'--	'--	'--	Blood Derived Normal	10	'--	released	'--	'--	'--	Not Reported	'--	'--	'--
TCGA-THCA	785803bb-42a8-4afb-b7b4-58c114894408	TCGA-FK-A3S3	f5ebefbe-50fa-465a-a355-2c099941039d	TCGA-FK-A3S3-01A	'--	'--	'--	'--	'--	1282	'--	'--	'--	'--	'--	'--	20.0	'--	FALSE	'--	'--	true	'--	6CE1962B-78BA-4FBC-B3FD-8AB5C4D1869A	'--	Primary Tumor	1	'--	released	'--	'--	'--	Not Reported	'--	'--	'--
TCGA-THCA	785803bb-42a8-4afb-b7b4-58c114894408	TCGA-FK-A3S3	3a18fe65-a6a8-476f-b918-da1a06db8577	TCGA-FK-A3S3-01Z	'--	'--	'--	'--	'--	'--	0	'--	'--	'--	'--	'--	'--	'--	TRUE	'--	'--	No	'--	'--	FFPE	Primary Tumor	1	'--	released	'--	'--	'--	Not Reported	'--	'--	'--
TCGA-THCA	6e1c9ac8-eead-4db9-8f30-ef3591daf78b	TCGA-ET-A39K	2669313a-0641-42e4-b284-964e426b9c9d	TCGA-ET-A39K-01A	'--	'--	'--	'--	'--	1989	'--	'--	'--	'--	'--	'--	80.0	'--	FALSE	'--	'--	true	'--	75057843-C8BE-4632-81AF-B6D383A10036	'--	Primary Tumor	1	'--	released	'--	'--	'--	Not Reported	'--	'--	'--
TCGA-THCA	6e1c9ac8-eead-4db9-8f30-ef3591daf78b	TCGA-ET-A39K	47d544f4-4ab3-4e18-968e-7d32af6a7851	TCGA-ET-A39K-10A	'--	'--	'--	'--	'--	1989	'--	'--	'--	'--	'--	'--	'--	'--	FALSE	'--	'--	false	'--	'--	'--	Blood Derived Normal	10	'--	released	'--	'--	'--	Not Reported	'--	'--	'--
TCGA-THCA	6e1c9ac8-eead-4db9-8f30-ef3591daf78b	TCGA-ET-A39K	9f717c47-1ae3-49d2-b900-c486dc7364ff	TCGA-ET-A39K-01Z	'--	'--	'--	'--	'--	'--	0	'--	'--	'--	'--	'--	'--	'--	TRUE	'--	'--	No	'--	'--	FFPE	Primary Tumor	1	'--	released	'--	'--	'--	Not Reported	'--	'--	'--
TCGA-THCA	0fe3b19a-f5e4-497e-92da-32ff6c77b066	TCGA-BJ-A0Z5	d17746b4-edea-45db-9ad1-5ee4973f007c	TCGA-BJ-A0Z5-01A	'--	'--	'--	'--	'--	168	'--	'--	'--	'--	'--	'--	520.0	'--	FALSE	'--	'--	true	'--	F4DCEE4E-CB1C-48CB-8BE2-90A9925D8A70	'--	Primary Tumor	1	'--	released	'--	'--	'--	Not Reported	'--	'--	'--
TCGA-THCA	0fe3b19a-f5e4-497e-92da-32ff6c77b066	TCGA-BJ-A0Z5	8c067558-66e7-43f3-8332-6cb96f657b4c	TCGA-BJ-A0Z5-10A	'--	'--	'--	'--	'--	168	'--	'--	'--	'--	'--	'--	'--	'--	FALSE	'--	'--	false	'--	'--	'--	Blood Derived Normal	10	'--	released	'--	'--	'--	Not Reported	'--	'--	'--
TCGA-THCA	0fe3b19a-f5e4-497e-92da-32ff6c77b066	TCGA-BJ-A0Z5	8a6ec2ec-d66c-4a71-97bf-750455a89e0d	TCGA-BJ-A0Z5-01Z	'--	'--	'--	'--	'--	'--	0	'--	'--	'--	'--	'--	'--	'--	TRUE	'--	'--	No	'--	'--	FFPE	Primary Tumor	1	'--	released	'--	'--	'--	Not Reported	'--	'--	'--
TCGA-THCA	c9dc11ad-d3f5-4cdf-9c26-7139580b59af	TCGA-EM-A2P3	9989e65f-210f-4357-ac69-f90b76590ef8	TCGA-EM-A2P3-01A	'--	'--	'--	'--	'--	69	'--	'--	'--	'--	'--	'--	60.0	'--	FALSE	'--	'--	false	'--	22142C95-F5AF-4C35-A12A-2B62321DFED7	'--	Primary Tumor	1	'--	released	'--	'--	'--	Not Reported	'--	'--	'--
TCGA-THCA	c9dc11ad-d3f5-4cdf-9c26-7139580b59af	TCGA-EM-A2P3	3c75f3c7-5242-4d01-ad65-c0dc834ec2eb	TCGA-EM-A2P3-01Z	'--	'--	'--	'--	'--	'--	0	'--	'--	'--	'--	'--	'--	'--	TRUE	'--	'--	No	'--	'--	FFPE	Primary Tumor	1	'--	released	'--	'--	'--	Not Reported	'--	'--	'--
TCGA-THCA	c9dc11ad-d3f5-4cdf-9c26-7139580b59af	TCGA-EM-A2P3	8b044707-4b65-4611-b5b4-ad0b3baf8c73	TCGA-EM-A2P3-10A	'--	'--	'--	'--	'--	161	'--	'--	'--	'--	'--	'--	'--	'--	FALSE	'--	'--	false	'--	'--	'--	Blood Derived Normal	10	'--	released	'--	'--	'--	Not Reported	'--	'--	'--
TCGA-THCA	99ac4f2e-2e63-4f1e-af0f-8f23a2caf999	TCGA-DJ-A13V	a870f5ca-f049-48c1-afac-b788a3111086	TCGA-DJ-A13V-01A	'--	'--	'--	'--	'--	154	'--	'--	'--	'--	'--	'--	610.0	'--	FALSE	'--	'--	true	'--	5967D6EE-E853-4756-85D0-69BA833680D8	'--	Primary Tumor	1	'--	released	'--	'--	'--	Not Reported	'--	'--	'--
TCGA-THCA	99ac4f2e-2e63-4f1e-af0f-8f23a2caf999	TCGA-DJ-A13V	ecf4e598-71da-4fb3-898b-fc77b26ab4a7	TCGA-DJ-A13V-01Z	'--	'--	'--	'--	'--	'--	0	'--	'--	'--	'--	'--	'--	'--	TRUE	'--	'--	No	'--	'--	FFPE	Primary Tumor	1	'--	released	'--	'--	'--	Not Reported	'--	'--	'--
TCGA-THCA	99ac4f2e-2e63-4f1e-af0f-8f23a2caf999	TCGA-DJ-A13V	727ff1f4-06e5-4b68-bce4-ec16dcf4893f	TCGA-DJ-A13V-10A	'--	'--	'--	'--	'--	154	'--	'--	'--	'--	'--	'--	'--	'--	FALSE	'--	'--	false	'--	'--	'--	Blood Derived Normal	10	'--	released	'--	'--	'--	Not Reported	'--	'--	'--
TCGA-THCA	18a58e3e-f18e-45cf-86bc-1851abb9b3de	TCGA-ET-A3DP	3a1b36a7-177d-4529-bc94-91a7c6063bce	TCGA-ET-A3DP-01A	'--	'--	'--	'--	'--	1632	'--	'--	'--	'--	'--	'--	170.0	'--	FALSE	'--	'--	true	'--	65943762-40CF-4F6D-8C1C-1CE807C02D6E	'--	Primary Tumor	1	'--	released	'--	'--	'--	Not Reported	'--	'--	'--
TCGA-THCA	18a58e3e-f18e-45cf-86bc-1851abb9b3de	TCGA-ET-A3DP	1a18a10b-7016-44bf-bbff-6e2d77ba87c9	TCGA-ET-A3DP-11A	'--	'--	'--	'--	'--	1632	'--	'--	'--	'--	'--	'--	340.0	'--	FALSE	'--	'--	true	'--	'--	'--	Solid Tissue Normal	11	'--	released	'--	'--	'--	Not Reported	'--	'--	'--
TCGA-THCA	18a58e3e-f18e-45cf-86bc-1851abb9b3de	TCGA-ET-A3DP	e98b56fc-aee2-4f91-8821-21cf344e09b0	TCGA-ET-A3DP-01Z	'--	'--	'--	'--	'--	'--	0	'--	'--	'--	'--	'--	'--	'--	TRUE	'--	'--	No	'--	'--	FFPE	Primary Tumor	1	'--	released	'--	'--	'--	Not Reported	'--	'--	'--
TCGA-THCA	2378935d-aebd-4f6f-b31b-53bc6bd59bf9	TCGA-DE-A7U5	8d3f3bf4-89c6-4036-bb36-89bc9ebceb7e	TCGA-DE-A7U5-01A	'--	'--	'--	'--	'--	105	'--	'--	'--	'--	'--	'--	150.0	'--	FALSE	'--	'--	false	'--	D66CF219-B082-4DC3-81B9-F0BC68C31844	'--	Primary Tumor	1	'--	released	'--	'--	'--	Not Reported	'--	'--	'--
TCGA-THCA	2378935d-aebd-4f6f-b31b-53bc6bd59bf9	TCGA-DE-A7U5	e1d96101-051b-46e8-91e7-4d90fd643fc5	TCGA-DE-A7U5-01Z	'--	'--	'--	'--	'--	'--	0	'--	'--	'--	'--	'--	'--	'--	TRUE	'--	'--	No	'--	'--	FFPE	Primary Tumor	1	'--	released	'--	'--	'--	Not Reported	'--	'--	'--
TCGA-THCA	2378935d-aebd-4f6f-b31b-53bc6bd59bf9	TCGA-DE-A7U5	009413cd-55c2-4c27-9ced-5cd6c73c0f60	TCGA-DE-A7U5-10A	'--	'--	'--	'--	'--	105	'--	'--	'--	'--	'--	'--	'--	'--	FALSE	'--	'--	false	'--	'--	'--	Blood Derived Normal	10	'--	released	'--	'--	'--	Not Reported	'--	'--	'--
TCGA-THCA	fb83f7d7-2182-4fb7-8e3e-8ad7f1feac72	TCGA-EL-A3CV	7bc433ed-7908-4297-aa5a-e033924bced1	TCGA-EL-A3CV-01A	'--	'--	'--	'--	'--	2352	'--	'--	'--	'--	'--	'--	290.0	'--	FALSE	'--	'--	true	'--	E2607487-999B-4EFB-8D7E-CB419FAB9FBB	'--	Primary Tumor	1	'--	released	'--	'--	'--	Not Reported	'--	'--	'--
TCGA-THCA	fb83f7d7-2182-4fb7-8e3e-8ad7f1feac72	TCGA-EL-A3CV	046c15a2-cfb6-49bd-b627-7bc146b20bf3	TCGA-EL-A3CV-01Z	'--	'--	'--	'--	'--	'--	0	'--	'--	'--	'--	'--	'--	'--	TRUE	'--	'--	No	'--	'--	FFPE	Primary Tumor	1	'--	released	'--	'--	'--	Not Reported	'--	'--	'--
TCGA-THCA	fb83f7d7-2182-4fb7-8e3e-8ad7f1feac72	TCGA-EL-A3CV	6779d98b-f6da-4b98-8ccb-98a566f3ed16	TCGA-EL-A3CV-10A	'--	'--	'--	'--	'--	2352	'--	'--	'--	'--	'--	'--	'--	'--	FALSE	'--	'--	false	'--	'--	'--	Blood Derived Normal	10	'--	released	'--	'--	'--	Not Reported	'--	'--	'--
TCGA-THCA	6a87bbc4-6161-4fc6-b4df-518d7831f4d2	TCGA-EM-A3AI	64b12423-4c3b-44cb-95c8-603c1e213949	TCGA-EM-A3AI-10A	'--	'--	'--	'--	'--	351	'--	'--	'--	'--	'--	'--	'--	'--	FALSE	'--	'--	false	'--	'--	'--	Blood Derived Normal	10	'--	released	'--	'--	'--	Not Reported	'--	'--	'--
TCGA-THCA	6a87bbc4-6161-4fc6-b4df-518d7831f4d2	TCGA-EM-A3AI	7c6ebb44-eb6f-4c33-a195-574d00d439b3	TCGA-EM-A3AI-01A	'--	'--	'--	'--	'--	294	'--	'--	'--	'--	'--	'--	100.0	'--	FALSE	'--	'--	false	'--	BFE17AA0-1A15-4BBE-B46B-87F4DDF40D4F	'--	Primary Tumor	1	'--	released	'--	'--	'--	Not Reported	'--	'--	'--
TCGA-THCA	6a87bbc4-6161-4fc6-b4df-518d7831f4d2	TCGA-EM-A3AI	fbca4198-11c6-443b-b049-22fc54ab5fa3	TCGA-EM-A3AI-01Z	'--	'--	'--	'--	'--	'--	0	'--	'--	'--	'--	'--	'--	'--	TRUE	'--	'--	No	'--	'--	FFPE	Primary Tumor	1	'--	released	'--	'--	'--	Not Reported	'--	'--	'--
TCGA-THCA	2c9e8686-9757-4e05-8d0e-efeaa3045d66	TCGA-CE-A481	0ebd81b4-420c-479e-8273-bf81d96eeff0	TCGA-CE-A481-10A	'--	'--	'--	'--	'--	269	'--	'--	'--	'--	'--	'--	'--	'--	FALSE	'--	'--	false	'--	'--	'--	Blood Derived Normal	10	'--	released	'--	'--	'--	Not Reported	'--	'--	'--
TCGA-THCA	2c9e8686-9757-4e05-8d0e-efeaa3045d66	TCGA-CE-A481	abce8a03-68a7-45ba-bfac-eefe95702c56	TCGA-CE-A481-01A	'--	'--	'--	'--	'--	269	'--	'--	'--	'--	'--	'--	330.0	'--	FALSE	'--	'--	true	'--	519EA683-0FCE-4DBF-A103-AE7EC565D237	'--	Primary Tumor	1	'--	released	'--	'--	'--	Not Reported	'--	'--	'--
TCGA-THCA	2c9e8686-9757-4e05-8d0e-efeaa3045d66	TCGA-CE-A481	dc17dd93-b27e-43f7-98cb-1aa4a22427d5	TCGA-CE-A481-01Z	'--	'--	'--	'--	'--	'--	0	'--	'--	'--	'--	'--	'--	'--	TRUE	'--	'--	No	'--	'--	FFPE	Primary Tumor	1	'--	released	'--	'--	'--	Not Reported	'--	'--	'--
TCGA-THCA	cd1656d8-55a5-4248-b81d-fed9d5992cbe	TCGA-FY-A3I4	54f622a1-9458-434f-915a-9fe23b29cec6	TCGA-FY-A3I4-01Z	'--	'--	'--	'--	'--	'--	0	'--	'--	'--	'--	'--	'--	'--	TRUE	'--	'--	No	'--	'--	FFPE	Primary Tumor	1	'--	released	'--	'--	'--	Not Reported	'--	'--	'--
TCGA-THCA	cd1656d8-55a5-4248-b81d-fed9d5992cbe	TCGA-FY-A3I4	047a268a-9597-4fa5-a8e6-b0149aff005e	TCGA-FY-A3I4-01A	'--	'--	'--	'--	'--	92	'--	'--	'--	'--	'--	'--	60.0	'--	FALSE	'--	'--	false	'--	9D03B6BA-32C0-47A1-B296-A7E9BD2B2EEF	'--	Primary Tumor	1	'--	released	'--	'--	'--	Not Reported	'--	'--	'--
TCGA-THCA	cd1656d8-55a5-4248-b81d-fed9d5992cbe	TCGA-FY-A3I4	4ce88439-a113-4a63-861b-4046575ff9d9	TCGA-FY-A3I4-10A	'--	'--	'--	'--	'--	92	'--	'--	'--	'--	'--	'--	'--	'--	FALSE	'--	'--	false	'--	'--	'--	Blood Derived Normal	10	'--	released	'--	'--	'--	Not Reported	'--	'--	'--
TCGA-THCA	a6d37f61-beca-46ea-a59a-62257475ac77	TCGA-BJ-A28W	7d71ba4c-491f-4387-a161-e430a2f53747	TCGA-BJ-A28W-01Z	'--	'--	'--	'--	'--	'--	0	'--	'--	'--	'--	'--	'--	'--	TRUE	'--	'--	No	'--	'--	FFPE	Primary Tumor	1	'--	released	'--	'--	'--	Not Reported	'--	'--	'--
TCGA-THCA	a6d37f61-beca-46ea-a59a-62257475ac77	TCGA-BJ-A28W	32aef736-82a4-4813-a272-86ef160e7d56	TCGA-BJ-A28W-01A	'--	'--	'--	'--	'--	105	'--	'--	'--	'--	'--	'--	160.0	'--	FALSE	'--	'--	true	'--	098C0E08-B4E1-4EE1-8472-0A737A8C521E	'--	Primary Tumor	1	'--	released	'--	'--	'--	Not Reported	'--	'--	'--
TCGA-THCA	a6d37f61-beca-46ea-a59a-62257475ac77	TCGA-BJ-A28W	1a0c8fe8-a0f6-4266-80af-79539c538fed	TCGA-BJ-A28W-11A	'--	'--	'--	'--	'--	105	'--	'--	'--	'--	'--	'--	160.0	'--	FALSE	'--	'--	true	'--	'--	'--	Solid Tissue Normal	11	'--	released	'--	'--	'--	Not Reported	'--	'--	'--
TCGA-THCA	a6d37f61-beca-46ea-a59a-62257475ac77	TCGA-BJ-A28W	5961bc0b-0b25-426e-8318-6e04406630a1	TCGA-BJ-A28W-10A	'--	'--	'--	'--	'--	105	'--	'--	'--	'--	'--	'--	'--	'--	FALSE	'--	'--	false	'--	'--	'--	Blood Derived Normal	10	'--	released	'--	'--	'--	Not Reported	'--	'--	'--
TCGA-THCA	3e787a0e-b5d2-401e-b1e5-077376090b3a	TCGA-DJ-A13R	4cd78789-f3ce-423a-a09e-0514c295a475	TCGA-DJ-A13R-10A	'--	'--	'--	'--	'--	95	'--	'--	'--	'--	'--	'--	'--	'--	FALSE	'--	'--	false	'--	'--	'--	Blood Derived Normal	10	'--	released	'--	'--	'--	Not Reported	'--	'--	'--
TCGA-THCA	3e787a0e-b5d2-401e-b1e5-077376090b3a	TCGA-DJ-A13R	27b0ff79-4213-4b57-b6e0-a393b8983d20	TCGA-DJ-A13R-01A	'--	'--	'--	'--	'--	95	'--	'--	'--	'--	'--	'--	430.0	'--	FALSE	'--	'--	true	'--	1A4EFF12-E96A-4D1E-8BA7-C126E7333211	'--	Primary Tumor	1	'--	released	'--	'--	'--	Not Reported	'--	'--	'--
TCGA-THCA	3e787a0e-b5d2-401e-b1e5-077376090b3a	TCGA-DJ-A13R	504a9ee4-a363-4cb8-8950-3d755c08f3e4	TCGA-DJ-A13R-01Z	'--	'--	'--	'--	'--	'--	0	'--	'--	'--	'--	'--	'--	'--	TRUE	'--	'--	No	'--	'--	FFPE	Primary Tumor	1	'--	released	'--	'--	'--	Not Reported	'--	'--	'--
TCGA-THCA	c5d08be7-b94c-423a-aea8-bbc635787c63	TCGA-BJ-A45I	e6294121-63c4-4736-9a99-9d277d5f3abd	TCGA-BJ-A45I-01A	'--	'--	'--	'--	'--	161	'--	'--	'--	'--	'--	'--	60.0	'--	FALSE	'--	'--	true	'--	AD17A97F-3FB4-4D09-8F84-97BEBD06DB0D	'--	Primary Tumor	1	'--	released	'--	'--	'--	Not Reported	'--	'--	'--
TCGA-THCA	c5d08be7-b94c-423a-aea8-bbc635787c63	TCGA-BJ-A45I	1b02dd05-9bf4-4f0c-a61a-4bd0005ef0f5	TCGA-BJ-A45I-11A	'--	'--	'--	'--	'--	161	'--	'--	'--	'--	'--	'--	290.0	'--	FALSE	'--	'--	true	'--	'--	'--	Solid Tissue Normal	11	'--	released	'--	'--	'--	Not Reported	'--	'--	'--
TCGA-THCA	c5d08be7-b94c-423a-aea8-bbc635787c63	TCGA-BJ-A45I	a114ae0e-29f0-4c2a-aa70-3a043a0901fc	TCGA-BJ-A45I-01Z	'--	'--	'--	'--	'--	'--	0	'--	'--	'--	'--	'--	'--	'--	TRUE	'--	'--	No	'--	'--	FFPE	Primary Tumor	1	'--	released	'--	'--	'--	Not Reported	'--	'--	'--
TCGA-THCA	c5d08be7-b94c-423a-aea8-bbc635787c63	TCGA-BJ-A45I	1faab123-fab2-4b73-8067-6cc4bbab9df2	TCGA-BJ-A45I-10A	'--	'--	'--	'--	'--	161	'--	'--	'--	'--	'--	'--	'--	'--	FALSE	'--	'--	false	'--	'--	'--	Blood Derived Normal	10	'--	released	'--	'--	'--	Not Reported	'--	'--	'--
TCGA-THCA	bed1fb3c-4459-460e-8190-29211857fa73	TCGA-BJ-A28V	a93821be-3ba7-4ee7-a939-313e9a2312b9	TCGA-BJ-A28V-01Z	'--	'--	'--	'--	'--	'--	0	'--	'--	'--	'--	'--	'--	'--	TRUE	'--	'--	No	'--	'--	FFPE	Primary Tumor	1	'--	released	'--	'--	'--	Not Reported	'--	'--	'--
TCGA-THCA	bed1fb3c-4459-460e-8190-29211857fa73	TCGA-BJ-A28V	4862b699-580d-4f2e-97a0-bd8918537067	TCGA-BJ-A28V-01A	'--	'--	'--	'--	'--	-138	'--	'--	'--	'--	'--	'--	280.0	'--	FALSE	'--	'--	true	'--	8CE75929-8C0F-4ED0-847C-DC3A442147F6	'--	Primary Tumor	1	'--	released	'--	'--	'--	Not Reported	'--	'--	'--
TCGA-THCA	bed1fb3c-4459-460e-8190-29211857fa73	TCGA-BJ-A28V	cfcc903c-dbd6-4cc5-acff-0630033cb493	TCGA-BJ-A28V-10A	'--	'--	'--	'--	'--	-138	'--	'--	'--	'--	'--	'--	'--	'--	FALSE	'--	'--	false	'--	'--	'--	Blood Derived Normal	10	'--	released	'--	'--	'--	Not Reported	'--	'--	'--
TCGA-THCA	faa51172-60ec-48d8-9224-36bfda1d27e0	TCGA-EL-A3H7	36faefa6-3739-4634-8912-83bf1b3fb9e9	TCGA-EL-A3H7-01Z	'--	'--	'--	'--	'--	'--	0	'--	'--	'--	'--	'--	'--	'--	TRUE	'--	'--	No	'--	'--	FFPE	Primary Tumor	1	'--	released	'--	'--	'--	Not Reported	'--	'--	'--
TCGA-THCA	faa51172-60ec-48d8-9224-36bfda1d27e0	TCGA-EL-A3H7	4923c241-0764-4055-99cf-c4720c58a3d0	TCGA-EL-A3H7-11A	'--	'--	'--	'--	'--	3506	'--	'--	'--	'--	'--	'--	230.0	'--	FALSE	'--	'--	false	'--	'--	'--	Solid Tissue Normal	11	'--	released	'--	'--	'--	Not Reported	'--	'--	'--
TCGA-THCA	faa51172-60ec-48d8-9224-36bfda1d27e0	TCGA-EL-A3H7	2884b621-dce7-4a50-ab33-144fdcda7497	TCGA-EL-A3H7-01A	'--	'--	'--	'--	'--	3506	'--	'--	'--	'--	'--	'--	240.0	'--	FALSE	'--	'--	false	'--	B0A349A2-09BE-4A7C-A4BD-C0EBAA9B33D6	'--	Primary Tumor	1	'--	released	'--	'--	'--	Not Reported	'--	'--	'--
TCGA-THCA	c30eb9bd-d705-4464-9014-e0aa7cda53c7	TCGA-ET-A25O	4714a896-709e-4a97-b15a-5b9fc145f377	TCGA-ET-A25O-01A	'--	'--	'--	'--	'--	560	'--	'--	'--	'--	'--	'--	90.0	'--	FALSE	'--	'--	true	'--	666D675C-FA0F-4CF6-90AE-7B2E442D039B	'--	Primary Tumor	1	'--	released	'--	'--	'--	Not Reported	'--	'--	'--
TCGA-THCA	c30eb9bd-d705-4464-9014-e0aa7cda53c7	TCGA-ET-A25O	d0a297dc-f94c-49db-864a-9474d2b639e3	TCGA-ET-A25O-01Z	'--	'--	'--	'--	'--	'--	0	'--	'--	'--	'--	'--	'--	'--	TRUE	'--	'--	No	'--	'--	FFPE	Primary Tumor	1	'--	released	'--	'--	'--	Not Reported	'--	'--	'--
TCGA-THCA	c30eb9bd-d705-4464-9014-e0aa7cda53c7	TCGA-ET-A25O	e052867f-5b31-44b4-9d8d-e05fd5e0a0cf	TCGA-ET-A25O-10A	'--	'--	'--	'--	'--	560	'--	'--	'--	'--	'--	'--	'--	'--	FALSE	'--	'--	false	'--	'--	'--	Blood Derived Normal	10	'--	released	'--	'--	'--	Not Reported	'--	'--	'--
TCGA-THCA	05a8268a-6b33-429b-8638-8c9bb366ef28	TCGA-FE-A3PB	955243d6-118f-41b7-bc8a-d3ddf7ad00b6	TCGA-FE-A3PB-01A	'--	'--	'--	'--	'--	2906	'--	'--	'--	'--	'--	'--	80.0	'--	FALSE	'--	'--	true	'--	048187E7-2B37-490A-9005-09541CACDD84	'--	Primary Tumor	1	'--	released	'--	'--	'--	Not Reported	'--	'--	'--
TCGA-THCA	05a8268a-6b33-429b-8638-8c9bb366ef28	TCGA-FE-A3PB	d0d9f815-b60e-41cc-8d03-de90c18aaa71	TCGA-FE-A3PB-01Z	'--	'--	'--	'--	'--	'--	0	'--	'--	'--	'--	'--	'--	'--	TRUE	'--	'--	No	'--	'--	FFPE	Primary Tumor	1	'--	released	'--	'--	'--	Not Reported	'--	'--	'--
TCGA-THCA	05a8268a-6b33-429b-8638-8c9bb366ef28	TCGA-FE-A3PB	094c47b3-d01d-4c2a-a387-59bd13c33a89	TCGA-FE-A3PB-10A	'--	'--	'--	'--	'--	2906	'--	'--	'--	'--	'--	'--	'--	'--	FALSE	'--	'--	false	'--	'--	'--	Blood Derived Normal	10	'--	released	'--	'--	'--	Not Reported	'--	'--	'--
TCGA-THCA	63c20d30-3bc9-4dca-8a8d-09fdea41f288	TCGA-J8-A42S	130a30fb-82ec-45a6-858c-15c1e6c5cbc8	TCGA-J8-A42S-01Z	'--	'--	'--	'--	'--	'--	0	'--	'--	'--	'--	'--	'--	'--	TRUE	'--	'--	No	'--	'--	FFPE	Primary Tumor	1	'--	released	'--	'--	'--	Not Reported	'--	'--	'--
TCGA-THCA	63c20d30-3bc9-4dca-8a8d-09fdea41f288	TCGA-J8-A42S	e2732fe9-7198-4f5a-8126-d1c5929bb385	TCGA-J8-A42S-01A	'--	'--	'--	'--	'--	98	'--	'--	'--	'--	'--	'--	100.0	'--	FALSE	'--	'--	true	'--	BB4E355B-3C6C-471E-8CF5-862CC0CD9935	'--	Primary Tumor	1	'--	released	'--	'--	'--	Not Reported	'--	'--	'--
TCGA-THCA	63c20d30-3bc9-4dca-8a8d-09fdea41f288	TCGA-J8-A42S	aca8490b-3d15-404a-84c7-87aa76ea25ba	TCGA-J8-A42S-10A	'--	'--	'--	'--	'--	98	'--	'--	'--	'--	'--	'--	'--	'--	FALSE	'--	'--	false	'--	'--	'--	Blood Derived Normal	10	'--	released	'--	'--	'--	Not Reported	'--	'--	'--
TCGA-THCA	707312fe-1d92-413e-a891-1ea3f496c343	TCGA-EM-A3AR	3af24ba9-804c-45a1-a533-d5da5d439379	TCGA-EM-A3AR-10A	'--	'--	'--	'--	'--	160	'--	'--	'--	'--	'--	'--	'--	'--	FALSE	'--	'--	false	'--	'--	'--	Blood Derived Normal	10	'--	released	'--	'--	'--	Not Reported	'--	'--	'--
TCGA-THCA	707312fe-1d92-413e-a891-1ea3f496c343	TCGA-EM-A3AR	938e3581-e41b-43e2-9158-565deea28720	TCGA-EM-A3AR-01Z	'--	'--	'--	'--	'--	'--	0	'--	'--	'--	'--	'--	'--	'--	TRUE	'--	'--	No	'--	'--	FFPE	Primary Tumor	1	'--	released	'--	'--	'--	Not Reported	'--	'--	'--
TCGA-THCA	707312fe-1d92-413e-a891-1ea3f496c343	TCGA-EM-A3AR	f970f195-179d-4050-8111-4d78339d8829	TCGA-EM-A3AR-01A	'--	'--	'--	'--	'--	103	'--	'--	'--	'--	'--	'--	50.0	'--	FALSE	'--	'--	false	'--	19DE70E7-8F9B-4B4F-ABE5-C9D734165AF7	'--	Primary Tumor	1	'--	released	'--	'--	'--	Not Reported	'--	'--	'--
TCGA-THCA	50ec4170-29ea-4ee9-8ce7-67ec78d1dc76	TCGA-EM-A4FU	5653b5d1-5517-4a8c-8159-ad76d854c17a	TCGA-EM-A4FU-10A	'--	'--	'--	'--	'--	1120	'--	'--	'--	'--	'--	'--	'--	'--	FALSE	'--	'--	false	'--	'--	'--	Blood Derived Normal	10	'--	released	'--	'--	'--	Not Reported	'--	'--	'--
TCGA-THCA	50ec4170-29ea-4ee9-8ce7-67ec78d1dc76	TCGA-EM-A4FU	b0b347f8-63a6-4448-be52-a0ec3ed230d7	TCGA-EM-A4FU-01Z	'--	'--	'--	'--	'--	'--	0	'--	'--	'--	'--	'--	'--	'--	TRUE	'--	'--	No	'--	'--	FFPE	Primary Tumor	1	'--	released	'--	'--	'--	Not Reported	'--	'--	'--
TCGA-THCA	50ec4170-29ea-4ee9-8ce7-67ec78d1dc76	TCGA-EM-A4FU	dd665cd1-dc08-4e3e-87ff-893db7d3debf	TCGA-EM-A4FU-01A	'--	'--	'--	'--	'--	1120	'--	'--	'--	'--	'--	'--	70.0	'--	FALSE	'--	'--	false	'--	429B4980-1DBE-4AF8-AB51-5F36BCC25940	'--	Primary Tumor	1	'--	released	'--	'--	'--	Not Reported	'--	'--	'--
TCGA-THCA	f69ff5fb-7e0b-4b16-9fc9-498379b11562	TCGA-E8-A2JQ	8f77dde8-99c4-4bde-b5ef-97d1172258fe	TCGA-E8-A2JQ-01Z	'--	'--	'--	'--	'--	'--	0	'--	'--	'--	'--	'--	'--	'--	TRUE	'--	'--	No	'--	'--	FFPE	Primary Tumor	1	'--	released	'--	'--	'--	Not Reported	'--	'--	'--
TCGA-THCA	f69ff5fb-7e0b-4b16-9fc9-498379b11562	TCGA-E8-A2JQ	bab8a1b8-70e1-4a7e-8106-a8ef6786d540	TCGA-E8-A2JQ-10A	'--	'--	'--	'--	'--	107	'--	'--	'--	'--	'--	'--	'--	'--	FALSE	'--	'--	false	'--	'--	'--	Blood Derived Normal	10	'--	released	'--	'--	'--	Not Reported	'--	'--	'--
TCGA-THCA	f69ff5fb-7e0b-4b16-9fc9-498379b11562	TCGA-E8-A2JQ	d03e9110-87e8-4b9c-93c9-ba306b5e9dee	TCGA-E8-A2JQ-01A	'--	'--	'--	'--	'--	107	'--	'--	'--	'--	'--	'--	140.0	'--	FALSE	'--	'--	true	'--	C1A33CCE-8C35-49E9-BE02-0E393F777674	'--	Primary Tumor	1	'--	released	'--	'--	'--	Not Reported	'--	'--	'--
TCGA-THCA	f69ff5fb-7e0b-4b16-9fc9-498379b11562	TCGA-E8-A2JQ	6a1e65a4-8bbe-4645-b2c9-0950b0acabf9	TCGA-E8-A2JQ-11A	'--	'--	'--	'--	'--	107	'--	'--	'--	'--	'--	'--	500.0	'--	FALSE	'--	'--	true	'--	'--	'--	Solid Tissue Normal	11	'--	released	'--	'--	'--	Not Reported	'--	'--	'--
TCGA-THCA	29963391-3926-4b7c-8066-185f0f2d5bfc	TCGA-ET-A4KQ	f76f10f8-bce1-4bab-8b70-ffaa560d45dc	TCGA-ET-A4KQ-01A	'--	'--	'--	'--	'--	51	'--	'--	'--	'--	'--	'--	230.0	'--	FALSE	'--	'--	true	'--	AE832FB1-0B21-463D-A8F5-68CF8EFDAC62	'--	Primary Tumor	1	'--	released	'--	'--	'--	Not Reported	'--	'--	'--
TCGA-THCA	29963391-3926-4b7c-8066-185f0f2d5bfc	TCGA-ET-A4KQ	985c85bb-9eca-4377-bf04-3f9bf51e81df	TCGA-ET-A4KQ-10A	'--	'--	'--	'--	'--	51	'--	'--	'--	'--	'--	'--	'--	'--	FALSE	'--	'--	false	'--	'--	'--	Blood Derived Normal	10	'--	released	'--	'--	'--	Not Reported	'--	'--	'--
TCGA-THCA	29963391-3926-4b7c-8066-185f0f2d5bfc	TCGA-ET-A4KQ	02409188-1ab2-404f-b1a4-7739874810bb	TCGA-ET-A4KQ-01Z	'--	'--	'--	'--	'--	'--	0	'--	'--	'--	'--	'--	'--	'--	TRUE	'--	'--	No	'--	'--	FFPE	Primary Tumor	1	'--	released	'--	'--	'--	Not Reported	'--	'--	'--
TCGA-THCA	1009a500-2a37-4aee-b7c3-049b5ce961a4	TCGA-BJ-A4O8	d0d638b7-40e7-42d0-af04-e0e4293de1d9	TCGA-BJ-A4O8-10A	'--	'--	'--	'--	'--	79	'--	'--	'--	'--	'--	'--	'--	'--	FALSE	'--	'--	false	'--	'--	'--	Blood Derived Normal	10	'--	released	'--	'--	'--	Not Reported	'--	'--	'--
TCGA-THCA	1009a500-2a37-4aee-b7c3-049b5ce961a4	TCGA-BJ-A4O8	1e62380c-71d8-4fe9-affc-9fec9faf2480	TCGA-BJ-A4O8-01A	'--	'--	'--	'--	'--	79	'--	'--	'--	'--	'--	'--	160.0	'--	FALSE	'--	'--	true	'--	12703516-FB7D-4C4B-BA56-5743810CB72F	'--	Primary Tumor	1	'--	released	'--	'--	'--	Not Reported	'--	'--	'--
TCGA-THCA	1009a500-2a37-4aee-b7c3-049b5ce961a4	TCGA-BJ-A4O8	e4a09dfb-d080-4ce3-8a91-1b1f01f7b9d7	TCGA-BJ-A4O8-01Z	'--	'--	'--	'--	'--	'--	0	'--	'--	'--	'--	'--	'--	'--	TRUE	'--	'--	No	'--	'--	FFPE	Primary Tumor	1	'--	released	'--	'--	'--	Not Reported	'--	'--	'--
TCGA-THCA	1009a500-2a37-4aee-b7c3-049b5ce961a4	TCGA-BJ-A4O8	d5edd072-a256-4a0d-ac50-93cd4edb1727	TCGA-BJ-A4O8-11A	'--	'--	'--	'--	'--	79	'--	'--	'--	'--	'--	'--	260.0	'--	FALSE	'--	'--	true	'--	'--	'--	Solid Tissue Normal	11	'--	released	'--	'--	'--	Not Reported	'--	'--	'--
TCGA-THCA	59221e3a-2927-40bf-a38d-4a5843ea179b	TCGA-FY-A3WA	ece96c1b-0dd1-4d2f-99d2-968fb622bfe5	TCGA-FY-A3WA-10A	'--	'--	'--	'--	'--	71	'--	'--	'--	'--	'--	'--	'--	'--	FALSE	'--	'--	false	'--	'--	'--	Blood Derived Normal	10	'--	released	'--	'--	'--	Not Reported	'--	'--	'--
TCGA-THCA	59221e3a-2927-40bf-a38d-4a5843ea179b	TCGA-FY-A3WA	a251fd67-9df2-49b6-b549-673fed73e28a	TCGA-FY-A3WA-01Z	'--	'--	'--	'--	'--	'--	0	'--	'--	'--	'--	'--	'--	'--	TRUE	'--	'--	No	'--	'--	FFPE	Primary Tumor	1	'--	released	'--	'--	'--	Not Reported	'--	'--	'--
TCGA-THCA	59221e3a-2927-40bf-a38d-4a5843ea179b	TCGA-FY-A3WA	67a68931-520a-4d95-bd5e-99896aaa133b	TCGA-FY-A3WA-01A	'--	'--	'--	'--	'--	71	'--	'--	'--	'--	'--	'--	200.0	'--	FALSE	'--	'--	false	'--	8569144D-DBE4-4012-9BE2-F39E44B83039	'--	Primary Tumor	1	'--	released	'--	'--	'--	Not Reported	'--	'--	'--
TCGA-THCA	38d03e42-db98-43bc-bb3d-2580cf55a681	TCGA-IM-A4EB	11ed0f3a-3d7f-4b0e-9354-5746d49cc64a	TCGA-IM-A4EB-01A	'--	'--	'--	'--	'--	121	'--	'--	'--	'--	'--	'--	50.0	'--	FALSE	'--	'--	true	'--	67DA9755-804F-4CCD-9C4B-7EA193341E30	'--	Primary Tumor	1	'--	released	'--	'--	'--	Not Reported	'--	'--	'--
TCGA-THCA	38d03e42-db98-43bc-bb3d-2580cf55a681	TCGA-IM-A4EB	93bcc417-8e9e-4c7a-ac25-1eb77aa428e6	TCGA-IM-A4EB-10A	'--	'--	'--	'--	'--	121	'--	'--	'--	'--	'--	'--	'--	'--	FALSE	'--	'--	false	'--	'--	'--	Blood Derived Normal	10	'--	released	'--	'--	'--	Not Reported	'--	'--	'--
TCGA-THCA	38d03e42-db98-43bc-bb3d-2580cf55a681	TCGA-IM-A4EB	6dfb4a22-1b32-4a0d-a698-17086531f819	TCGA-IM-A4EB-01Z	'--	'--	'--	'--	'--	'--	0	'--	'--	'--	'--	'--	'--	'--	TRUE	'--	'--	No	'--	'--	FFPE	Primary Tumor	1	'--	released	'--	'--	'--	Not Reported	'--	'--	'--
TCGA-THCA	c2291b36-7b7f-4c07-a164-6600d9e7929f	TCGA-EM-A3FP	6c0bf3fd-6f68-4d76-b31b-3375a6741379	TCGA-EM-A3FP-01A	'--	'--	'--	'--	'--	137	'--	'--	'--	'--	'--	'--	110.0	'--	FALSE	'--	'--	false	'--	59293B22-6D8E-4DC9-ABED-B4831E4FB34B	'--	Primary Tumor	1	'--	released	'--	'--	'--	Not Reported	'--	'--	'--
TCGA-THCA	c2291b36-7b7f-4c07-a164-6600d9e7929f	TCGA-EM-A3FP	15211bf7-ead8-4152-b6a5-2255ddc3a5f9	TCGA-EM-A3FP-10A	'--	'--	'--	'--	'--	200	'--	'--	'--	'--	'--	'--	'--	'--	FALSE	'--	'--	false	'--	'--	'--	Blood Derived Normal	10	'--	released	'--	'--	'--	Not Reported	'--	'--	'--
TCGA-THCA	c2291b36-7b7f-4c07-a164-6600d9e7929f	TCGA-EM-A3FP	6280e43e-535b-40fd-ba02-c226921529c0	TCGA-EM-A3FP-01Z	'--	'--	'--	'--	'--	'--	0	'--	'--	'--	'--	'--	'--	'--	TRUE	'--	'--	No	'--	'--	FFPE	Primary Tumor	1	'--	released	'--	'--	'--	Not Reported	'--	'--	'--
TCGA-THCA	dffef9e8-5b69-43d9-a95b-0744daa38d1d	TCGA-E3-A3DY	1f2677b9-5bc6-4976-856d-0457b750ba98	TCGA-E3-A3DY-10A	'--	'--	'--	'--	'--	1738	'--	'--	'--	'--	'--	'--	'--	'--	FALSE	'--	'--	false	'--	'--	'--	Blood Derived Normal	10	'--	released	'--	'--	'--	Not Reported	'--	'--	'--
TCGA-THCA	dffef9e8-5b69-43d9-a95b-0744daa38d1d	TCGA-E3-A3DY	2dc7cce6-0a73-4b48-8723-1a2511c5b295	TCGA-E3-A3DY-01A	'--	'--	'--	'--	'--	1682	'--	'--	'--	'--	'--	'--	220.0	'--	FALSE	'--	'--	false	'--	C455F124-6CC8-4B9E-9CA6-68DF0A518639	'--	Primary Tumor	1	'--	released	'--	'--	'--	Not Reported	'--	'--	'--
TCGA-THCA	dffef9e8-5b69-43d9-a95b-0744daa38d1d	TCGA-E3-A3DY	13ed4ec5-575b-4c1d-90be-236e77c1e3d7	TCGA-E3-A3DY-01Z	'--	'--	'--	'--	'--	'--	0	'--	'--	'--	'--	'--	'--	'--	TRUE	'--	'--	No	'--	'--	FFPE	Primary Tumor	1	'--	released	'--	'--	'--	Not Reported	'--	'--	'--
TCGA-THCA	3b088cb4-6fd4-45ac-a708-dffd873546dc	TCGA-BJ-A45E	08483e91-2081-44d2-81b4-557e3f827c47	TCGA-BJ-A45E-11A	'--	'--	'--	'--	'--	100	'--	'--	'--	'--	'--	'--	170.0	'--	FALSE	'--	'--	true	'--	'--	'--	Solid Tissue Normal	11	'--	released	'--	'--	'--	Not Reported	'--	'--	'--
TCGA-THCA	3b088cb4-6fd4-45ac-a708-dffd873546dc	TCGA-BJ-A45E	c4d60838-3ea2-492a-85da-45a80fd20146	TCGA-BJ-A45E-01A	'--	'--	'--	'--	'--	100	'--	'--	'--	'--	'--	'--	40.0	'--	FALSE	'--	'--	true	'--	BEB7D523-29E2-4DD1-89E6-06CB04541FB9	'--	Primary Tumor	1	'--	released	'--	'--	'--	Not Reported	'--	'--	'--
TCGA-THCA	3b088cb4-6fd4-45ac-a708-dffd873546dc	TCGA-BJ-A45E	a6442d28-a0f0-467e-b42c-30c615bf5114	TCGA-BJ-A45E-01Z	'--	'--	'--	'--	'--	'--	0	'--	'--	'--	'--	'--	'--	'--	TRUE	'--	'--	No	'--	'--	FFPE	Primary Tumor	1	'--	released	'--	'--	'--	Not Reported	'--	'--	'--
TCGA-THCA	3b088cb4-6fd4-45ac-a708-dffd873546dc	TCGA-BJ-A45E	071d9ca4-08fe-4abb-a152-e22063e70c56	TCGA-BJ-A45E-10A	'--	'--	'--	'--	'--	100	'--	'--	'--	'--	'--	'--	'--	'--	FALSE	'--	'--	false	'--	'--	'--	Blood Derived Normal	10	'--	released	'--	'--	'--	Not Reported	'--	'--	'--
TCGA-THCA	24a968aa-8169-44cb-a8ac-72d7efa1fa7b	TCGA-EL-A3GS	496a0d04-1db6-4b9e-8f2b-ccc9493e5aa1	TCGA-EL-A3GS-10A	'--	'--	'--	'--	'--	1533	'--	'--	'--	'--	'--	'--	'--	'--	FALSE	'--	'--	false	'--	'--	'--	Blood Derived Normal	10	'--	released	'--	'--	'--	Not Reported	'--	'--	'--
TCGA-THCA	24a968aa-8169-44cb-a8ac-72d7efa1fa7b	TCGA-EL-A3GS	207970ee-0dc2-459e-b17e-df1b4a2416db	TCGA-EL-A3GS-01A	'--	'--	'--	'--	'--	1533	'--	'--	'--	'--	'--	'--	230.0	'--	FALSE	'--	'--	false	'--	1FE3CE73-2A35-4436-A60D-7FEEE216B7B4	'--	Primary Tumor	1	'--	released	'--	'--	'--	Not Reported	'--	'--	'--
TCGA-THCA	24a968aa-8169-44cb-a8ac-72d7efa1fa7b	TCGA-EL-A3GS	b64d6a83-311b-41c8-8a17-15159ce3f52f	TCGA-EL-A3GS-01Z	'--	'--	'--	'--	'--	'--	0	'--	'--	'--	'--	'--	'--	'--	TRUE	'--	'--	No	'--	'--	FFPE	Primary Tumor	1	'--	released	'--	'--	'--	Not Reported	'--	'--	'--
TCGA-THCA	7802140a-e518-4ae6-9bd1-c26d80b14ab1	TCGA-EM-A2CK	69a0865d-fbd5-4902-b876-36c6a4c7d9b7	TCGA-EM-A2CK-10A	'--	'--	'--	'--	'--	253	'--	'--	'--	'--	'--	'--	'--	'--	FALSE	'--	'--	false	'--	'--	'--	Blood Derived Normal	10	'--	released	'--	'--	'--	Not Reported	'--	'--	'--
TCGA-THCA	7802140a-e518-4ae6-9bd1-c26d80b14ab1	TCGA-EM-A2CK	53b4b1bf-2c13-4530-8e58-9629b20c658e	TCGA-EM-A2CK-01A	'--	'--	'--	'--	'--	163	'--	'--	'--	'--	'--	'--	100.0	'--	FALSE	'--	'--	false	'--	993E18F7-4FD8-4867-8921-55182FE4BFBA	'--	Primary Tumor	1	'--	released	'--	'--	'--	Not Reported	'--	'--	'--
TCGA-THCA	7802140a-e518-4ae6-9bd1-c26d80b14ab1	TCGA-EM-A2CK	f0253d72-b610-4905-aa93-5f9725fd38bd	TCGA-EM-A2CK-01Z	'--	'--	'--	'--	'--	'--	0	'--	'--	'--	'--	'--	'--	'--	TRUE	'--	'--	No	'--	'--	FFPE	Primary Tumor	1	'--	released	'--	'--	'--	Not Reported	'--	'--	'--
TCGA-THCA	256976a4-41ab-445e-ae26-c594ba1fa324	TCGA-DJ-A4UP	f3bae8e8-b5ff-44c9-8c7b-6fc9ae41f099	TCGA-DJ-A4UP-10A	'--	'--	'--	'--	'--	231	'--	'--	'--	'--	'--	'--	'--	'--	FALSE	'--	'--	false	'--	'--	'--	Blood Derived Normal	10	'--	released	'--	'--	'--	Not Reported	'--	'--	'--
TCGA-THCA	256976a4-41ab-445e-ae26-c594ba1fa324	TCGA-DJ-A4UP	0b8d804b-e1e2-416d-a1d6-fd589f276d9a	TCGA-DJ-A4UP-01Z	'--	'--	'--	'--	'--	'--	0	'--	'--	'--	'--	'--	'--	'--	TRUE	'--	'--	No	'--	'--	FFPE	Primary Tumor	1	'--	released	'--	'--	'--	Not Reported	'--	'--	'--
TCGA-THCA	256976a4-41ab-445e-ae26-c594ba1fa324	TCGA-DJ-A4UP	800ea1a9-1802-4647-b0ae-62e7f2d8e1ff	TCGA-DJ-A4UP-01A	'--	'--	'--	'--	'--	231	'--	'--	'--	'--	'--	'--	270.0	'--	FALSE	'--	'--	true	'--	54D2F116-9BEF-4B6D-A30C-745481122882	'--	Primary Tumor	1	'--	released	'--	'--	'--	Not Reported	'--	'--	'--
TCGA-THCA	3b1e2bd6-3d32-40f7-9b32-0df32dfcbc72	TCGA-DJ-A1QI	ff0c61f9-7f90-48b4-ba4e-f9d7b61a8557	TCGA-DJ-A1QI-10A	'--	'--	'--	'--	'--	115	'--	'--	'--	'--	'--	'--	'--	'--	FALSE	'--	'--	false	'--	'--	'--	Blood Derived Normal	10	'--	released	'--	'--	'--	Not Reported	'--	'--	'--
TCGA-THCA	3b1e2bd6-3d32-40f7-9b32-0df32dfcbc72	TCGA-DJ-A1QI	c58506a1-8c6b-4ce8-99e0-f2d1234f95f5	TCGA-DJ-A1QI-01A	'--	'--	'--	'--	'--	115	'--	'--	'--	'--	'--	'--	160.0	'--	FALSE	'--	'--	true	'--	D81A9CFF-AF3D-4657-9B75-41E72E084286	'--	Primary Tumor	1	'--	released	'--	'--	'--	Not Reported	'--	'--	'--
TCGA-THCA	3b1e2bd6-3d32-40f7-9b32-0df32dfcbc72	TCGA-DJ-A1QI	5d97db7f-ee67-4d49-ae5b-f7c541e62778	TCGA-DJ-A1QI-01Z	'--	'--	'--	'--	'--	'--	0	'--	'--	'--	'--	'--	'--	'--	TRUE	'--	'--	No	'--	'--	FFPE	Primary Tumor	1	'--	released	'--	'--	'--	Not Reported	'--	'--	'--
TCGA-THCA	5eb0d577-223b-4409-89d1-5c5d196affc3	TCGA-FE-A232	213be6ee-1e61-4fa0-9b73-66b696086397	TCGA-FE-A232-01A	'--	'--	'--	'--	'--	1325	'--	'--	'--	'--	'--	'--	130.0	'--	FALSE	'--	'--	false	'--	B06679A8-F5E6-42AD-AE62-EB08C37B5033	'--	Primary Tumor	1	'--	released	'--	'--	'--	Not Reported	'--	'--	'--
TCGA-THCA	5eb0d577-223b-4409-89d1-5c5d196affc3	TCGA-FE-A232	305278f6-641b-45c8-a758-5148346161c8	TCGA-FE-A232-10A	'--	'--	'--	'--	'--	1337	'--	'--	'--	'--	'--	'--	'--	'--	FALSE	'--	'--	false	'--	'--	'--	Blood Derived Normal	10	'--	released	'--	'--	'--	Not Reported	'--	'--	'--
TCGA-THCA	5eb0d577-223b-4409-89d1-5c5d196affc3	TCGA-FE-A232	8664de1c-22e9-473a-92d5-b568d2d7fc8e	TCGA-FE-A232-01Z	'--	'--	'--	'--	'--	'--	0	'--	'--	'--	'--	'--	'--	'--	TRUE	'--	'--	No	'--	'--	FFPE	Primary Tumor	1	'--	released	'--	'--	'--	Not Reported	'--	'--	'--
TCGA-THCA	b983a678-b0ae-42c2-8f37-d6ecaf07413b	TCGA-FY-A3R7	56ee4f74-5062-4e0c-ae57-f7084683f829	TCGA-FY-A3R7-01Z	'--	'--	'--	'--	'--	'--	0	'--	'--	'--	'--	'--	'--	'--	TRUE	'--	'--	No	'--	'--	FFPE	Primary Tumor	1	'--	released	'--	'--	'--	Not Reported	'--	'--	'--
TCGA-THCA	b983a678-b0ae-42c2-8f37-d6ecaf07413b	TCGA-FY-A3R7	e85b6bc8-c182-4483-8f53-f312d5a545cb	TCGA-FY-A3R7-01A	'--	'--	'--	'--	'--	27	'--	'--	'--	'--	'--	'--	19.0	'--	FALSE	'--	'--	true	'--	1D97E5A9-0629-4545-9BCE-2E7729C031A8	'--	Primary Tumor	1	'--	released	'--	'--	'--	Not Reported	'--	'--	'--
TCGA-THCA	b983a678-b0ae-42c2-8f37-d6ecaf07413b	TCGA-FY-A3R7	8734208a-0724-4409-847d-496e1cf21b79	TCGA-FY-A3R7-10A	'--	'--	'--	'--	'--	27	'--	'--	'--	'--	'--	'--	'--	'--	FALSE	'--	'--	false	'--	'--	'--	Blood Derived Normal	10	'--	released	'--	'--	'--	Not Reported	'--	'--	'--
TCGA-THCA	80420c04-709b-4ab2-a88c-1e22b3a09b9c	TCGA-EM-A2P0	ea8d3659-841b-4fa7-9fdd-aebd2c67cb05	TCGA-EM-A2P0-10A	'--	'--	'--	'--	'--	200	'--	'--	'--	'--	'--	'--	'--	'--	FALSE	'--	'--	false	'--	'--	'--	Blood Derived Normal	10	'--	released	'--	'--	'--	Not Reported	'--	'--	'--
TCGA-THCA	80420c04-709b-4ab2-a88c-1e22b3a09b9c	TCGA-EM-A2P0	4e0f4044-2d6f-4214-9a9e-19e14a7a65f9	TCGA-EM-A2P0-01Z	'--	'--	'--	'--	'--	'--	0	'--	'--	'--	'--	'--	'--	'--	TRUE	'--	'--	No	'--	'--	FFPE	Primary Tumor	1	'--	released	'--	'--	'--	Not Reported	'--	'--	'--
TCGA-THCA	80420c04-709b-4ab2-a88c-1e22b3a09b9c	TCGA-EM-A2P0	dd441612-6ddf-4a8d-92f5-818d564d38c9	TCGA-EM-A2P0-01A	'--	'--	'--	'--	'--	108	'--	'--	'--	'--	'--	'--	80.0	'--	FALSE	'--	'--	false	'--	EA891EB1-8E94-4D95-88CD-65E5B2B6F43D	'--	Primary Tumor	1	'--	released	'--	'--	'--	Not Reported	'--	'--	'--
TCGA-THCA	227dac7d-6bc3-4d8b-ac9c-ea4cab9a602c	TCGA-MK-A84Z	aec769ee-23b8-443f-8197-4ec5918728c1	TCGA-MK-A84Z-01Z	'--	'--	'--	'--	'--	'--	0	'--	'--	'--	'--	'--	'--	'--	TRUE	'--	'--	No	'--	'--	FFPE	Primary Tumor	1	'--	released	'--	'--	'--	Not Reported	'--	'--	'--
TCGA-THCA	227dac7d-6bc3-4d8b-ac9c-ea4cab9a602c	TCGA-MK-A84Z	11ee8add-ad30-49c7-9749-0a35013d925c	TCGA-MK-A84Z-10A	'--	'--	'--	'--	'--	178	'--	'--	'--	'--	'--	'--	'--	'--	FALSE	'--	'--	false	'--	'--	'--	Blood Derived Normal	10	'--	released	'--	'--	'--	Not Reported	'--	'--	'--
TCGA-THCA	227dac7d-6bc3-4d8b-ac9c-ea4cab9a602c	TCGA-MK-A84Z	139f6657-166f-4a2f-828f-60ce3579cd09	TCGA-MK-A84Z-01A	'--	'--	'--	'--	'--	178	'--	'--	'--	'--	'--	'--	60.0	'--	FALSE	'--	'--	true	'--	A0C1F12C-4035-4651-B43D-EA3708DC8FF3	'--	Primary Tumor	1	'--	released	'--	'--	'--	Not Reported	'--	'--	'--
TCGA-THCA	1f6be7ca-76fd-4509-99a6-dfa59b0ac51f	TCGA-EM-A2OZ	243e6940-5b46-4be2-b206-e538506faddd	TCGA-EM-A2OZ-10A	'--	'--	'--	'--	'--	221	'--	'--	'--	'--	'--	'--	'--	'--	FALSE	'--	'--	false	'--	'--	'--	Blood Derived Normal	10	'--	released	'--	'--	'--	Not Reported	'--	'--	'--
TCGA-THCA	1f6be7ca-76fd-4509-99a6-dfa59b0ac51f	TCGA-EM-A2OZ	39085dc6-46fe-4d3b-ae3f-04443dacb7c2	TCGA-EM-A2OZ-01A	'--	'--	'--	'--	'--	129	'--	'--	'--	'--	'--	'--	70.0	'--	FALSE	'--	'--	false	'--	6BAC2A4F-D374-4F03-A25B-E73A622DB185	'--	Primary Tumor	1	'--	released	'--	'--	'--	Not Reported	'--	'--	'--
TCGA-THCA	1f6be7ca-76fd-4509-99a6-dfa59b0ac51f	TCGA-EM-A2OZ	28adccb4-9db3-4a8a-859b-5c5f9a0979b7	TCGA-EM-A2OZ-01Z	'--	'--	'--	'--	'--	'--	0	'--	'--	'--	'--	'--	'--	'--	TRUE	'--	'--	No	'--	'--	FFPE	Primary Tumor	1	'--	released	'--	'--	'--	Not Reported	'--	'--	'--
TCGA-THCA	39d45532-d2f4-49f1-b1c6-880ff0ebe0ed	TCGA-EL-A3H3	3a3ed7eb-b000-4c3e-af24-54f3ae6972f2	TCGA-EL-A3H3-10A	'--	'--	'--	'--	'--	1087	'--	'--	'--	'--	'--	'--	'--	'--	FALSE	'--	'--	false	'--	'--	'--	Blood Derived Normal	10	'--	released	'--	'--	'--	Not Reported	'--	'--	'--
TCGA-THCA	39d45532-d2f4-49f1-b1c6-880ff0ebe0ed	TCGA-EL-A3H3	2dab943c-22fe-4199-8ee0-2d47d8727a34	TCGA-EL-A3H3-01Z	'--	'--	'--	'--	'--	'--	0	'--	'--	'--	'--	'--	'--	'--	TRUE	'--	'--	No	'--	'--	FFPE	Primary Tumor	1	'--	released	'--	'--	'--	Not Reported	'--	'--	'--
TCGA-THCA	39d45532-d2f4-49f1-b1c6-880ff0ebe0ed	TCGA-EL-A3H3	3fc6f39f-af2f-4757-9e38-e08b0da9d01b	TCGA-EL-A3H3-01A	'--	'--	'--	'--	'--	1087	'--	'--	'--	'--	'--	'--	280.0	'--	FALSE	'--	'--	false	'--	397F6046-731D-4689-A52E-8C6C415D4132	'--	Primary Tumor	1	'--	released	'--	'--	'--	Not Reported	'--	'--	'--
TCGA-THCA	d5ea6520-e446-43d2-9883-441f70d80359	TCGA-E8-A413	21b7c8b2-f658-4995-a9ee-918442c91598	TCGA-E8-A413-01Z	'--	'--	'--	'--	'--	'--	0	'--	'--	'--	'--	'--	'--	'--	TRUE	'--	'--	No	'--	'--	FFPE	Primary Tumor	1	'--	released	'--	'--	'--	Not Reported	'--	'--	'--
TCGA-THCA	d5ea6520-e446-43d2-9883-441f70d80359	TCGA-E8-A413	16447733-672b-4542-bc5b-9c1677f86824	TCGA-E8-A413-10A	'--	'--	'--	'--	'--	54	'--	'--	'--	'--	'--	'--	'--	'--	FALSE	'--	'--	false	'--	'--	'--	Blood Derived Normal	10	'--	released	'--	'--	'--	Not Reported	'--	'--	'--
TCGA-THCA	d5ea6520-e446-43d2-9883-441f70d80359	TCGA-E8-A413	bd7107d8-e336-4a95-b2eb-80fc597cf7d4	TCGA-E8-A413-01A	'--	'--	'--	'--	'--	54	'--	'--	'--	'--	'--	'--	440.0	'--	FALSE	'--	'--	true	'--	67AA3628-75B9-4045-869C-CE3A28B2DA1D	'--	Primary Tumor	1	'--	released	'--	'--	'--	Not Reported	'--	'--	'--
TCGA-THCA	77200abe-4a09-4a4a-bb45-60d9b96d4998	TCGA-EL-A3H2	bb1c17f0-fc4e-42aa-8da3-edc14088f228	TCGA-EL-A3H2-01Z	'--	'--	'--	'--	'--	'--	0	'--	'--	'--	'--	'--	'--	'--	TRUE	'--	'--	No	'--	'--	FFPE	Primary Tumor	1	'--	released	'--	'--	'--	Not Reported	'--	'--	'--
TCGA-THCA	77200abe-4a09-4a4a-bb45-60d9b96d4998	TCGA-EL-A3H2	405fbe40-5934-431a-8806-325ac0d788ed	TCGA-EL-A3H2-11A	'--	'--	'--	'--	'--	3292	'--	'--	'--	'--	'--	'--	200.0	'--	FALSE	'--	'--	false	'--	'--	'--	Solid Tissue Normal	11	'--	released	'--	'--	'--	Not Reported	'--	'--	'--
TCGA-THCA	77200abe-4a09-4a4a-bb45-60d9b96d4998	TCGA-EL-A3H2	64e11d42-fec9-47e4-a6a6-8df2a6bfd79b	TCGA-EL-A3H2-01A	'--	'--	'--	'--	'--	3292	'--	'--	'--	'--	'--	'--	220.0	'--	FALSE	'--	'--	false	'--	BB009B7A-967E-441F-B73E-0463B3BEEA73	'--	Primary Tumor	1	'--	released	'--	'--	'--	Not Reported	'--	'--	'--
TCGA-THCA	b0cb6ed7-3d9f-4d5e-8df5-edcc921c43b4	TCGA-FY-A2QD	08d3cb3b-9a80-4034-b06d-b37dd38c8b9b	TCGA-FY-A2QD-01A	'--	'--	'--	'--	'--	170	'--	'--	'--	'--	'--	'--	150.0	'--	FALSE	'--	'--	false	'--	D4447081-2054-46B6-B83F-C0D2DF8C4AA1	'--	Primary Tumor	1	'--	released	'--	'--	'--	Not Reported	'--	'--	'--
TCGA-THCA	b0cb6ed7-3d9f-4d5e-8df5-edcc921c43b4	TCGA-FY-A2QD	79c2d43d-39e0-46a4-9cad-f0088ea5f4a0	TCGA-FY-A2QD-10A	'--	'--	'--	'--	'--	170	'--	'--	'--	'--	'--	'--	'--	'--	FALSE	'--	'--	false	'--	'--	'--	Blood Derived Normal	10	'--	released	'--	'--	'--	Not Reported	'--	'--	'--
TCGA-THCA	b0cb6ed7-3d9f-4d5e-8df5-edcc921c43b4	TCGA-FY-A2QD	71053fea-324a-4c3f-8fd6-d452a066d97f	TCGA-FY-A2QD-01Z	'--	'--	'--	'--	'--	'--	0	'--	'--	'--	'--	'--	'--	'--	TRUE	'--	'--	No	'--	'--	FFPE	Primary Tumor	1	'--	released	'--	'--	'--	Not Reported	'--	'--	'--
TCGA-THCA	667eb7f6-1d36-49bb-9d7b-c9d167b64619	TCGA-EM-A2CU	a815d53a-d7f1-4e33-9c30-28d11c4a86fc	TCGA-EM-A2CU-01Z	'--	'--	'--	'--	'--	'--	0	'--	'--	'--	'--	'--	'--	'--	TRUE	'--	'--	No	'--	'--	FFPE	Primary Tumor	1	'--	released	'--	'--	'--	Not Reported	'--	'--	'--
TCGA-THCA	667eb7f6-1d36-49bb-9d7b-c9d167b64619	TCGA-EM-A2CU	5f75f169-6835-4b42-af77-ab64cbfb5ef3	TCGA-EM-A2CU-01A	'--	'--	'--	'--	'--	72	'--	'--	'--	'--	'--	'--	120.0	'--	FALSE	'--	'--	false	'--	77194F16-66D9-4D4F-B111-0AC53989F6DC	'--	Primary Tumor	1	'--	released	'--	'--	'--	Not Reported	'--	'--	'--
TCGA-THCA	667eb7f6-1d36-49bb-9d7b-c9d167b64619	TCGA-EM-A2CU	85cc9d3f-2919-4387-b4a4-469e92eefdc3	TCGA-EM-A2CU-10A	'--	'--	'--	'--	'--	162	'--	'--	'--	'--	'--	'--	'--	'--	FALSE	'--	'--	false	'--	'--	'--	Blood Derived Normal	10	'--	released	'--	'--	'--	Not Reported	'--	'--	'--
TCGA-THCA	3b5582e4-58af-4a01-b83d-6fe9704f2b43	TCGA-ET-A3BN	a0224d95-faab-4d4a-ae9f-1e5715dbc99a	TCGA-ET-A3BN-01A	'--	'--	'--	'--	'--	918	'--	'--	'--	'--	'--	'--	150.0	'--	FALSE	'--	'--	true	'--	285F05E8-2C8E-4D4A-968C-AE1F3D5882FE	'--	Primary Tumor	1	'--	released	'--	'--	'--	Not Reported	'--	'--	'--
TCGA-THCA	3b5582e4-58af-4a01-b83d-6fe9704f2b43	TCGA-ET-A3BN	84692630-6b90-4653-84ac-1e4f23a8034e	TCGA-ET-A3BN-01Z	'--	'--	'--	'--	'--	'--	0	'--	'--	'--	'--	'--	'--	'--	TRUE	'--	'--	No	'--	'--	FFPE	Primary Tumor	1	'--	released	'--	'--	'--	Not Reported	'--	'--	'--
TCGA-THCA	3b5582e4-58af-4a01-b83d-6fe9704f2b43	TCGA-ET-A3BN	1f4d0750-d896-43c8-8528-abf2c7f4a6ad	TCGA-ET-A3BN-10A	'--	'--	'--	'--	'--	918	'--	'--	'--	'--	'--	'--	'--	'--	FALSE	'--	'--	false	'--	'--	'--	Blood Derived Normal	10	'--	released	'--	'--	'--	Not Reported	'--	'--	'--
TCGA-THCA	b43a4f92-7a13-4558-a97e-7b3feb2d70c9	TCGA-EM-A1YB	403cc531-b5f1-4afe-a25c-d2d9ee272331	TCGA-EM-A1YB-01Z	'--	'--	'--	'--	'--	'--	0	'--	'--	'--	'--	'--	'--	'--	TRUE	'--	'--	No	'--	'--	FFPE	Primary Tumor	1	'--	released	'--	'--	'--	Not Reported	'--	'--	'--
TCGA-THCA	b43a4f92-7a13-4558-a97e-7b3feb2d70c9	TCGA-EM-A1YB	d4c2816c-b09f-49a4-9fb8-0cabfa72553e	TCGA-EM-A1YB-10A	'--	'--	'--	'--	'--	171	'--	'--	'--	'--	'--	'--	'--	'--	FALSE	'--	'--	false	'--	'--	'--	Blood Derived Normal	10	'--	released	'--	'--	'--	Not Reported	'--	'--	'--
TCGA-THCA	b43a4f92-7a13-4558-a97e-7b3feb2d70c9	TCGA-EM-A1YB	13c7182d-ef93-48a7-9569-eed7714cec40	TCGA-EM-A1YB-01A	'--	'--	'--	'--	'--	171	'--	'--	'--	'--	'--	'--	120.0	'--	FALSE	'--	'--	false	'--	B07E51BC-B961-4B1C-81A1-352CED88468A	'--	Primary Tumor	1	'--	released	'--	'--	'--	Not Reported	'--	'--	'--
TCGA-THCA	e48a8fa7-4e2b-44a0-95f5-e2925c60bad3	TCGA-FK-A3SH	7effb8c1-cdf1-4609-b9ae-0e12ec5066eb	TCGA-FK-A3SH-01A	'--	'--	'--	'--	'--	1338	'--	'--	'--	'--	'--	'--	40.0	'--	FALSE	'--	'--	true	'--	0BFE6CA6-DA46-4162-A403-3F51F9F9EABA	'--	Primary Tumor	1	'--	released	'--	'--	'--	Not Reported	'--	'--	'--
TCGA-THCA	e48a8fa7-4e2b-44a0-95f5-e2925c60bad3	TCGA-FK-A3SH	19e33479-9b43-449d-b58c-7f1767d262a4	TCGA-FK-A3SH-01Z	'--	'--	'--	'--	'--	'--	0	'--	'--	'--	'--	'--	'--	'--	TRUE	'--	'--	No	'--	'--	FFPE	Primary Tumor	1	'--	released	'--	'--	'--	Not Reported	'--	'--	'--
TCGA-THCA	e48a8fa7-4e2b-44a0-95f5-e2925c60bad3	TCGA-FK-A3SH	e4181a6f-eda8-4582-9e02-ff666a7e40d0	TCGA-FK-A3SH-10A	'--	'--	'--	'--	'--	1338	'--	'--	'--	'--	'--	'--	'--	'--	FALSE	'--	'--	false	'--	'--	'--	Blood Derived Normal	10	'--	released	'--	'--	'--	Not Reported	'--	'--	'--
TCGA-THCA	04dc8ee3-ec93-4b56-a546-f96746f8122f	TCGA-EL-A3ZM	a1a70a5f-1ac8-49e1-97f2-de7bac4c6230	TCGA-EL-A3ZM-01A	'--	'--	'--	'--	'--	1554	'--	'--	'--	'--	'--	'--	240.0	'--	FALSE	'--	'--	false	'--	66FF897A-C66C-486F-B72F-D06F8F35B89D	'--	Primary Tumor	1	'--	released	'--	'--	'--	Not Reported	'--	'--	'--
TCGA-THCA	04dc8ee3-ec93-4b56-a546-f96746f8122f	TCGA-EL-A3ZM	c0899f7e-c7aa-4acd-afaf-d22878b8bfdf	TCGA-EL-A3ZM-01Z	'--	'--	'--	'--	'--	'--	0	'--	'--	'--	'--	'--	'--	'--	TRUE	'--	'--	No	'--	'--	FFPE	Primary Tumor	1	'--	released	'--	'--	'--	Not Reported	'--	'--	'--
TCGA-THCA	04dc8ee3-ec93-4b56-a546-f96746f8122f	TCGA-EL-A3ZM	86a5d24b-aa99-4ebd-8ef9-1f518e6f788f	TCGA-EL-A3ZM-11A	'--	'--	'--	'--	'--	1554	'--	'--	'--	'--	'--	'--	230.0	'--	FALSE	'--	'--	false	'--	'--	'--	Solid Tissue Normal	11	'--	released	'--	'--	'--	Not Reported	'--	'--	'--
TCGA-THCA	aa528913-cbbc-4e1d-b6d0-87f6a46bcbc9	TCGA-EL-A3GO	74cd44b7-728e-4951-a7c7-67a82bc0f887	TCGA-EL-A3GO-01A	'--	'--	'--	'--	'--	1128	'--	'--	'--	'--	'--	'--	220.0	'--	FALSE	'--	'--	false	'--	8DAD2F04-A959-479D-B58F-39D081026080	'--	Primary Tumor	1	'--	released	'--	'--	'--	Not Reported	'--	'--	'--
TCGA-THCA	aa528913-cbbc-4e1d-b6d0-87f6a46bcbc9	TCGA-EL-A3GO	ac03fd42-5179-4ade-b26e-1058bd26b9ee	TCGA-EL-A3GO-10A	'--	'--	'--	'--	'--	1128	'--	'--	'--	'--	'--	'--	'--	'--	FALSE	'--	'--	false	'--	'--	'--	Blood Derived Normal	10	'--	released	'--	'--	'--	Not Reported	'--	'--	'--
TCGA-THCA	aa528913-cbbc-4e1d-b6d0-87f6a46bcbc9	TCGA-EL-A3GO	c5bc65bf-58a9-4db2-8766-1cc1b94d1ef2	TCGA-EL-A3GO-01Z	'--	'--	'--	'--	'--	'--	0	'--	'--	'--	'--	'--	'--	'--	TRUE	'--	'--	No	'--	'--	FFPE	Primary Tumor	1	'--	released	'--	'--	'--	Not Reported	'--	'--	'--
TCGA-THCA	1757c89f-8795-4c3b-bbad-1e6f617f2472	TCGA-ET-A39J	f1a60ca8-a19e-4802-bca8-d7286a3f4a77	TCGA-ET-A39J-01A	'--	'--	'--	'--	'--	1946	'--	'--	'--	'--	'--	'--	70.0	'--	FALSE	'--	'--	true	'--	3B981FAD-AA10-4FCE-84FD-97C14CEF2EB7	'--	Primary Tumor	1	'--	released	'--	'--	'--	Not Reported	'--	'--	'--
TCGA-THCA	1757c89f-8795-4c3b-bbad-1e6f617f2472	TCGA-ET-A39J	17b6a238-dde5-424f-bf54-9a108bacc72d	TCGA-ET-A39J-01Z	'--	'--	'--	'--	'--	'--	0	'--	'--	'--	'--	'--	'--	'--	TRUE	'--	'--	No	'--	'--	FFPE	Primary Tumor	1	'--	released	'--	'--	'--	Not Reported	'--	'--	'--
TCGA-THCA	1757c89f-8795-4c3b-bbad-1e6f617f2472	TCGA-ET-A39J	77634ed0-0679-4ea9-bdce-71459bd641b6	TCGA-ET-A39J-10A	'--	'--	'--	'--	'--	1946	'--	'--	'--	'--	'--	'--	'--	'--	FALSE	'--	'--	false	'--	'--	'--	Blood Derived Normal	10	'--	released	'--	'--	'--	Not Reported	'--	'--	'--
TCGA-THCA	d78012b6-24f9-48f5-9409-9845d0be2b3c	TCGA-DJ-A3UO	14576d79-1556-49b8-9b40-958eaf8f8d9b	TCGA-DJ-A3UO-01Z	'--	'--	'--	'--	'--	'--	0	'--	'--	'--	'--	'--	'--	'--	TRUE	'--	'--	No	'--	'--	FFPE	Primary Tumor	1	'--	released	'--	'--	'--	Not Reported	'--	'--	'--
TCGA-THCA	d78012b6-24f9-48f5-9409-9845d0be2b3c	TCGA-DJ-A3UO	9503131b-20e3-47df-9ff0-83bdf1376cdc	TCGA-DJ-A3UO-10A	'--	'--	'--	'--	'--	482	'--	'--	'--	'--	'--	'--	'--	'--	FALSE	'--	'--	false	'--	'--	'--	Blood Derived Normal	10	'--	released	'--	'--	'--	Not Reported	'--	'--	'--
TCGA-THCA	d78012b6-24f9-48f5-9409-9845d0be2b3c	TCGA-DJ-A3UO	ac509941-28b2-4257-a8cd-918f8572f64d	TCGA-DJ-A3UO-01A	'--	'--	'--	'--	'--	482	'--	'--	'--	'--	'--	'--	420.0	'--	FALSE	'--	'--	true	'--	53819A9B-A594-445D-BD36-BB29B7FC0607	'--	Primary Tumor	1	'--	released	'--	'--	'--	Not Reported	'--	'--	'--
TCGA-THCA	5c118e15-1e48-42a6-8d29-179e6e71a26c	TCGA-FY-A4B4	8cf3f64a-8f09-43fe-b908-8ee1b6243019	TCGA-FY-A4B4-01A	'--	'--	'--	'--	'--	104	'--	'--	'--	'--	'--	'--	50.0	'--	FALSE	'--	'--	false	'--	AA3D281C-3066-4E7E-8ECC-67708FBD5173	'--	Primary Tumor	1	'--	released	'--	'--	'--	Not Reported	'--	'--	'--
TCGA-THCA	5c118e15-1e48-42a6-8d29-179e6e71a26c	TCGA-FY-A4B4	95cd1393-e5be-46f8-bd59-4b32134f243b	TCGA-FY-A4B4-10A	'--	'--	'--	'--	'--	104	'--	'--	'--	'--	'--	'--	'--	'--	FALSE	'--	'--	false	'--	'--	'--	Blood Derived Normal	10	'--	released	'--	'--	'--	Not Reported	'--	'--	'--
TCGA-THCA	5c118e15-1e48-42a6-8d29-179e6e71a26c	TCGA-FY-A4B4	ccc0de4f-fd73-4fe4-9343-7b8002e0f015	TCGA-FY-A4B4-01Z	'--	'--	'--	'--	'--	'--	0	'--	'--	'--	'--	'--	'--	'--	TRUE	'--	'--	No	'--	'--	FFPE	Primary Tumor	1	'--	released	'--	'--	'--	Not Reported	'--	'--	'--
TCGA-THCA	acba8d76-999a-4f6d-b3a4-8d7dd0f2bb52	TCGA-DJ-A2Q3	34a17146-a455-4d38-aece-b3785acaa490	TCGA-DJ-A2Q3-01Z	'--	'--	'--	'--	'--	'--	0	'--	'--	'--	'--	'--	'--	'--	TRUE	'--	'--	No	'--	'--	FFPE	Primary Tumor	1	'--	released	'--	'--	'--	Not Reported	'--	'--	'--
TCGA-THCA	acba8d76-999a-4f6d-b3a4-8d7dd0f2bb52	TCGA-DJ-A2Q3	405917f3-f500-4193-bd5d-faa6bbac9927	TCGA-DJ-A2Q3-10A	'--	'--	'--	'--	'--	125	'--	'--	'--	'--	'--	'--	'--	'--	FALSE	'--	'--	false	'--	'--	'--	Blood Derived Normal	10	'--	released	'--	'--	'--	Not Reported	'--	'--	'--
TCGA-THCA	acba8d76-999a-4f6d-b3a4-8d7dd0f2bb52	TCGA-DJ-A2Q3	7949d5bd-f0f0-4b11-bc49-dade6c57bcb1	TCGA-DJ-A2Q3-01A	'--	'--	'--	'--	'--	125	'--	'--	'--	'--	'--	'--	80.0	'--	FALSE	'--	'--	true	'--	A65C7D99-30AE-46C3-AFA3-691C0EB0D43C	'--	Primary Tumor	1	'--	released	'--	'--	'--	Not Reported	'--	'--	'--
TCGA-THCA	b8cb385a-4e5f-4932-944d-04d6ea1bba5a	TCGA-BJ-A45G	0254ff56-2579-47a4-bf6c-5d25edb79a81	TCGA-BJ-A45G-01Z	'--	'--	'--	'--	'--	'--	0	'--	'--	'--	'--	'--	'--	'--	TRUE	'--	'--	No	'--	'--	FFPE	Primary Tumor	1	'--	released	'--	'--	'--	Not Reported	'--	'--	'--
TCGA-THCA	b8cb385a-4e5f-4932-944d-04d6ea1bba5a	TCGA-BJ-A45G	31ba1767-ee52-474d-ae45-a54e9a4e82df	TCGA-BJ-A45G-01A	'--	'--	'--	'--	'--	136	'--	'--	'--	'--	'--	'--	240.0	'--	FALSE	'--	'--	true	'--	4B23A4BB-14FC-4A52-A148-0739020C65AA	'--	Primary Tumor	1	'--	released	'--	'--	'--	Not Reported	'--	'--	'--
TCGA-THCA	b8cb385a-4e5f-4932-944d-04d6ea1bba5a	TCGA-BJ-A45G	659b0b35-4695-4e4b-adc8-8359e134b042	TCGA-BJ-A45G-10A	'--	'--	'--	'--	'--	136	'--	'--	'--	'--	'--	'--	'--	'--	FALSE	'--	'--	false	'--	'--	'--	Blood Derived Normal	10	'--	released	'--	'--	'--	Not Reported	'--	'--	'--
TCGA-THCA	b8cb385a-4e5f-4932-944d-04d6ea1bba5a	TCGA-BJ-A45G	d7737cd5-d467-4e8e-acfd-42bb63a95580	TCGA-BJ-A45G-11A	'--	'--	'--	'--	'--	136	'--	'--	'--	'--	'--	'--	360.0	'--	FALSE	'--	'--	true	'--	'--	'--	Solid Tissue Normal	11	'--	released	'--	'--	'--	Not Reported	'--	'--	'--
TCGA-THCA	39d90499-8549-4da5-b391-c421f18facf1	TCGA-FE-A3PD	d0c59b57-7fa3-4f1e-a771-dad1cf60dba4	TCGA-FE-A3PD-01Z	'--	'--	'--	'--	'--	'--	0	'--	'--	'--	'--	'--	'--	'--	TRUE	'--	'--	No	'--	'--	FFPE	Primary Tumor	1	'--	released	'--	'--	'--	Not Reported	'--	'--	'--
TCGA-THCA	39d90499-8549-4da5-b391-c421f18facf1	TCGA-FE-A3PD	a6c23ca9-e6f4-4a2c-bb86-25ef76076381	TCGA-FE-A3PD-01A	'--	'--	'--	'--	'--	2094	'--	'--	'--	'--	'--	'--	50.0	'--	FALSE	'--	'--	true	'--	F8EB4396-7186-41BA-B4BD-9BE38ED4B9E6	'--	Primary Tumor	1	'--	released	'--	'--	'--	Not Reported	'--	'--	'--
TCGA-THCA	39d90499-8549-4da5-b391-c421f18facf1	TCGA-FE-A3PD	703333e7-a2ba-4601-8f33-d0cd1f587e76	TCGA-FE-A3PD-10A	'--	'--	'--	'--	'--	2094	'--	'--	'--	'--	'--	'--	'--	'--	FALSE	'--	'--	false	'--	'--	'--	Blood Derived Normal	10	'--	released	'--	'--	'--	Not Reported	'--	'--	'--
TCGA-THCA	c438c562-a2b6-4ceb-b91a-7e77eb2ec962	TCGA-E8-A415	8e674ef1-dfad-4600-bcba-2b282366d44e	TCGA-E8-A415-10A	'--	'--	'--	'--	'--	58	'--	'--	'--	'--	'--	'--	'--	'--	FALSE	'--	'--	false	'--	'--	'--	Blood Derived Normal	10	'--	released	'--	'--	'--	Not Reported	'--	'--	'--
TCGA-THCA	c438c562-a2b6-4ceb-b91a-7e77eb2ec962	TCGA-E8-A415	f24da390-205c-482f-99de-8f8ae4edbc86	TCGA-E8-A415-01A	'--	'--	'--	'--	'--	58	'--	'--	'--	'--	'--	'--	220.0	'--	FALSE	'--	'--	true	'--	1592C973-2E73-4A7D-9DF3-7EFD67E67519	'--	Primary Tumor	1	'--	released	'--	'--	'--	Not Reported	'--	'--	'--
TCGA-THCA	c438c562-a2b6-4ceb-b91a-7e77eb2ec962	TCGA-E8-A415	3b368db7-eb88-4fec-a1db-27201dc55ef4	TCGA-E8-A415-01Z	'--	'--	'--	'--	'--	'--	0	'--	'--	'--	'--	'--	'--	'--	TRUE	'--	'--	No	'--	'--	FFPE	Primary Tumor	1	'--	released	'--	'--	'--	Not Reported	'--	'--	'--
TCGA-THCA	300720c8-68e5-4a3b-a873-3ad36ad0f953	TCGA-FE-A236	fe9c9dc5-9617-401f-99c9-9de3718a51c3	TCGA-FE-A236-10A	'--	'--	'--	'--	'--	2477	'--	'--	'--	'--	'--	'--	'--	'--	FALSE	'--	'--	false	'--	'--	'--	Blood Derived Normal	10	'--	released	'--	'--	'--	Not Reported	'--	'--	'--
TCGA-THCA	300720c8-68e5-4a3b-a873-3ad36ad0f953	TCGA-FE-A236	6e2aabb1-2418-49ac-80ac-60bb8fd5e13b	TCGA-FE-A236-01A	'--	'--	'--	'--	'--	2465	'--	'--	'--	'--	'--	'--	110.0	'--	FALSE	'--	'--	true	'--	E47EE58C-029A-45DB-8EC1-4AFD3AEB07F3	'--	Primary Tumor	1	'--	released	'--	'--	'--	Not Reported	'--	'--	'--
TCGA-THCA	300720c8-68e5-4a3b-a873-3ad36ad0f953	TCGA-FE-A236	4ceccaa0-d741-431f-8b85-943c7af3e62e	TCGA-FE-A236-01Z	'--	'--	'--	'--	'--	'--	0	'--	'--	'--	'--	'--	'--	'--	TRUE	'--	'--	No	'--	'--	FFPE	Primary Tumor	1	'--	released	'--	'--	'--	Not Reported	'--	'--	'--
TCGA-THCA	58ff4366-20a3-40a2-a87a-551e17cdb5d3	TCGA-FY-A3RA	e67e2bbe-8c3f-41b1-be3c-c89555a10aee	TCGA-FY-A3RA-01A	'--	'--	'--	'--	'--	181	'--	'--	'--	'--	'--	'--	40.0	'--	FALSE	'--	'--	true	'--	370C33BA-DDB3-4DA9-984E-68037C4C5D73	'--	Primary Tumor	1	'--	released	'--	'--	'--	Not Reported	'--	'--	'--
TCGA-THCA	58ff4366-20a3-40a2-a87a-551e17cdb5d3	TCGA-FY-A3RA	89efbee6-a4b5-429d-814c-c488bcfffb2b	TCGA-FY-A3RA-01Z	'--	'--	'--	'--	'--	'--	0	'--	'--	'--	'--	'--	'--	'--	TRUE	'--	'--	No	'--	'--	FFPE	Primary Tumor	1	'--	released	'--	'--	'--	Not Reported	'--	'--	'--
TCGA-THCA	58ff4366-20a3-40a2-a87a-551e17cdb5d3	TCGA-FY-A3RA	c40fb837-4cf9-4aac-9ad5-24cffa1b0428	TCGA-FY-A3RA-10A	'--	'--	'--	'--	'--	181	'--	'--	'--	'--	'--	'--	'--	'--	FALSE	'--	'--	false	'--	'--	'--	Blood Derived Normal	10	'--	released	'--	'--	'--	Not Reported	'--	'--	'--
TCGA-THCA	cd0c33c3-4427-471d-979e-79dc43f3a018	TCGA-DE-A4MD	51280b54-9eb6-4d2e-af57-e96c91488488	TCGA-DE-A4MD-06A	'--	'--	'--	'--	'--	386	'--	'--	'--	'--	'--	'--	430.0	'--	FALSE	'--	'--	false	'--	ECDA6157-FC03-47FD-8070-C082DF08E75D	'--	Metastatic	6	'--	released	'--	'--	'--	Not Reported	'--	'--	'--
TCGA-THCA	cd0c33c3-4427-471d-979e-79dc43f3a018	TCGA-DE-A4MD	6e4a272f-83bf-4e5b-948f-aabfa30b685a	TCGA-DE-A4MD-01A	'--	'--	'--	'--	'--	386	'--	'--	'--	'--	'--	'--	290.0	'--	FALSE	'--	'--	false	'--	931E6481-993D-4DF4-81DB-2796377A6B96	'--	Primary Tumor	1	'--	released	'--	'--	'--	Not Reported	'--	'--	'--
TCGA-THCA	cd0c33c3-4427-471d-979e-79dc43f3a018	TCGA-DE-A4MD	1d06bdfd-e405-439f-9387-984b79e62e5b	TCGA-DE-A4MD-10A	'--	'--	'--	'--	'--	386	'--	'--	'--	'--	'--	'--	'--	'--	FALSE	'--	'--	false	'--	'--	'--	Blood Derived Normal	10	'--	released	'--	'--	'--	Not Reported	'--	'--	'--
TCGA-THCA	cd0c33c3-4427-471d-979e-79dc43f3a018	TCGA-DE-A4MD	3e8367da-4e3c-40bd-aaf4-1a0bce304487	TCGA-DE-A4MD-01Z	'--	'--	'--	'--	'--	'--	0	'--	'--	'--	'--	'--	'--	'--	TRUE	'--	'--	No	'--	'--	FFPE	Primary Tumor	1	'--	released	'--	'--	'--	Not Reported	'--	'--	'--
TCGA-THCA	1e63d4b3-1b49-4bb9-b64f-001273aae120	TCGA-BJ-A2N9	48171f82-064d-467a-9e04-7b850c5e99c2	TCGA-BJ-A2N9-01A	'--	'--	'--	'--	'--	97	'--	'--	'--	'--	'--	'--	220.0	'--	FALSE	'--	'--	true	'--	53203C6A-0B8E-4563-A150-21E3F8F3A0E2	'--	Primary Tumor	1	'--	released	'--	'--	'--	Not Reported	'--	'--	'--
TCGA-THCA	1e63d4b3-1b49-4bb9-b64f-001273aae120	TCGA-BJ-A2N9	4a1a29ec-2f78-4c44-a443-6b175fe049fd	TCGA-BJ-A2N9-01Z	'--	'--	'--	'--	'--	'--	0	'--	'--	'--	'--	'--	'--	'--	TRUE	'--	'--	No	'--	'--	FFPE	Primary Tumor	1	'--	released	'--	'--	'--	Not Reported	'--	'--	'--
TCGA-THCA	1e63d4b3-1b49-4bb9-b64f-001273aae120	TCGA-BJ-A2N9	c87edafd-7f66-491c-9c83-972e24999d6e	TCGA-BJ-A2N9-10A	'--	'--	'--	'--	'--	97	'--	'--	'--	'--	'--	'--	'--	'--	FALSE	'--	'--	false	'--	'--	'--	Blood Derived Normal	10	'--	released	'--	'--	'--	Not Reported	'--	'--	'--
TCGA-THCA	1e63d4b3-1b49-4bb9-b64f-001273aae120	TCGA-BJ-A2N9	8c09b8fa-7ce6-448e-b68c-eda0bafd4114	TCGA-BJ-A2N9-11A	'--	'--	'--	'--	'--	97	'--	'--	'--	'--	'--	'--	130.0	'--	FALSE	'--	'--	true	'--	'--	'--	Solid Tissue Normal	11	'--	released	'--	'--	'--	Not Reported	'--	'--	'--
TCGA-THCA	02a8e937-c747-4ba1-911c-0860e62b8f83	TCGA-DJ-A3UY	d475adf6-f4da-4988-865b-2ecc56cc65a8	TCGA-DJ-A3UY-01Z	'--	'--	'--	'--	'--	'--	0	'--	'--	'--	'--	'--	'--	'--	TRUE	'--	'--	No	'--	'--	FFPE	Primary Tumor	1	'--	released	'--	'--	'--	Not Reported	'--	'--	'--
TCGA-THCA	02a8e937-c747-4ba1-911c-0860e62b8f83	TCGA-DJ-A3UY	1bcbd492-986e-41d1-bcff-0bfb7dd74ae9	TCGA-DJ-A3UY-01A	'--	'--	'--	'--	'--	295	'--	'--	'--	'--	'--	'--	400.0	'--	FALSE	'--	'--	true	'--	31C6D2B0-71BA-4E3E-A3FA-911F3B2B1BFC	'--	Primary Tumor	1	'--	released	'--	'--	'--	Not Reported	'--	'--	'--
TCGA-THCA	02a8e937-c747-4ba1-911c-0860e62b8f83	TCGA-DJ-A3UY	a11f816c-2b7d-498f-8c34-3fc4bd2a02c6	TCGA-DJ-A3UY-10A	'--	'--	'--	'--	'--	295	'--	'--	'--	'--	'--	'--	'--	'--	FALSE	'--	'--	false	'--	'--	'--	Blood Derived Normal	10	'--	released	'--	'--	'--	Not Reported	'--	'--	'--
TCGA-THCA	63b01b43-a68a-4046-89b0-736ba4d08504	TCGA-FK-A3SD	eb001d98-07c7-42ba-bdca-8cbadb4b926a	TCGA-FK-A3SD-10A	'--	'--	'--	'--	'--	1072	'--	'--	'--	'--	'--	'--	'--	'--	FALSE	'--	'--	false	'--	'--	'--	Blood Derived Normal	10	'--	released	'--	'--	'--	Not Reported	'--	'--	'--
TCGA-THCA	63b01b43-a68a-4046-89b0-736ba4d08504	TCGA-FK-A3SD	124638dd-68ed-44b3-a6b6-90b63441f6e6	TCGA-FK-A3SD-01Z	'--	'--	'--	'--	'--	'--	0	'--	'--	'--	'--	'--	'--	'--	TRUE	'--	'--	No	'--	'--	FFPE	Primary Tumor	1	'--	released	'--	'--	'--	Not Reported	'--	'--	'--
TCGA-THCA	63b01b43-a68a-4046-89b0-736ba4d08504	TCGA-FK-A3SD	b48d226e-610a-40dc-b62a-6db863a7366c	TCGA-FK-A3SD-01A	'--	'--	'--	'--	'--	1072	'--	'--	'--	'--	'--	'--	140.0	'--	FALSE	'--	'--	true	'--	6E68253F-66C4-4B31-95F5-C1B2BD3009BF	'--	Primary Tumor	1	'--	released	'--	'--	'--	Not Reported	'--	'--	'--
TCGA-THCA	80aeb61d-21cf-4804-90ea-5d22eb06e299	TCGA-H2-A421	39b63e37-bf0f-45bd-b4c9-c56139e633eb	TCGA-H2-A421-01Z	'--	'--	'--	'--	'--	'--	0	'--	'--	'--	'--	'--	'--	'--	TRUE	'--	'--	No	'--	'--	FFPE	Primary Tumor	1	'--	released	'--	'--	'--	Not Reported	'--	'--	'--
TCGA-THCA	80aeb61d-21cf-4804-90ea-5d22eb06e299	TCGA-H2-A421	2699ea0f-f07d-4af4-a8d1-5cefa5bba314	TCGA-H2-A421-10A	'--	'--	'--	'--	'--	14	'--	'--	'--	'--	'--	'--	'--	'--	FALSE	'--	'--	false	'--	'--	'--	Blood Derived Normal	10	'--	released	'--	'--	'--	Not Reported	'--	'--	'--
TCGA-THCA	80aeb61d-21cf-4804-90ea-5d22eb06e299	TCGA-H2-A421	99d4fdd0-1860-4225-ba61-e3808dbf51b3	TCGA-H2-A421-01A	'--	'--	'--	'--	'--	14	'--	'--	'--	'--	'--	'--	30.0	'--	FALSE	'--	'--	false	'--	AEBDEC5D-4BCD-4815-A63B-2719F37C186B	'--	Primary Tumor	1	'--	released	'--	'--	'--	Not Reported	'--	'--	'--
TCGA-THCA	c77976b6-35ea-4623-a92a-6d9440a978e6	TCGA-FY-A3R8	86b51cdf-01b7-42c8-b0ca-81f598cb2011	TCGA-FY-A3R8-01Z	'--	'--	'--	'--	'--	'--	0	'--	'--	'--	'--	'--	'--	'--	TRUE	'--	'--	No	'--	'--	FFPE	Primary Tumor	1	'--	released	'--	'--	'--	Not Reported	'--	'--	'--
TCGA-THCA	c77976b6-35ea-4623-a92a-6d9440a978e6	TCGA-FY-A3R8	baa64e5a-237e-44ac-8b22-2d86e710f7db	TCGA-FY-A3R8-01A	'--	'--	'--	'--	'--	51	'--	'--	'--	'--	'--	'--	70.0	'--	FALSE	'--	'--	true	'--	1A79B4F7-8315-450C-A1E9-BAA89C6E9001	'--	Primary Tumor	1	'--	released	'--	'--	'--	Not Reported	'--	'--	'--
TCGA-THCA	c77976b6-35ea-4623-a92a-6d9440a978e6	TCGA-FY-A3R8	0bb3305b-7846-4ef8-956e-4a0ea66e1b6e	TCGA-FY-A3R8-10A	'--	'--	'--	'--	'--	51	'--	'--	'--	'--	'--	'--	'--	'--	FALSE	'--	'--	false	'--	'--	'--	Blood Derived Normal	10	'--	released	'--	'--	'--	Not Reported	'--	'--	'--
TCGA-THCA	430ad51d-f68c-40b2-bfa2-9da68370b7fa	TCGA-J8-A3NZ	54f379d7-c7f2-424b-a78e-5fe37691ea07	TCGA-J8-A3NZ-01A	'--	'--	'--	'--	'--	96	'--	'--	'--	'--	'--	'--	120.0	'--	FALSE	'--	'--	false	'--	0C81E059-8C59-4197-825E-19E5A3AF9372	'--	Primary Tumor	1	'--	released	'--	'--	'--	Not Reported	'--	'--	'--
TCGA-THCA	430ad51d-f68c-40b2-bfa2-9da68370b7fa	TCGA-J8-A3NZ	5d295030-7725-4b91-8fdd-98e5efdf1284	TCGA-J8-A3NZ-10A	'--	'--	'--	'--	'--	96	'--	'--	'--	'--	'--	'--	'--	'--	FALSE	'--	'--	false	'--	'--	'--	Blood Derived Normal	10	'--	released	'--	'--	'--	Not Reported	'--	'--	'--
TCGA-THCA	430ad51d-f68c-40b2-bfa2-9da68370b7fa	TCGA-J8-A3NZ	af664d00-4df8-4c85-b9d0-f903543a1418	TCGA-J8-A3NZ-01Z	'--	'--	'--	'--	'--	'--	0	'--	'--	'--	'--	'--	'--	'--	TRUE	'--	'--	No	'--	'--	FFPE	Primary Tumor	1	'--	released	'--	'--	'--	Not Reported	'--	'--	'--
TCGA-THCA	f00fd40a-1254-4300-baf9-88528c453a2e	TCGA-DJ-A2Q4	06bc0679-4793-4588-bdca-fc2b26dc616b	TCGA-DJ-A2Q4-01Z	'--	'--	'--	'--	'--	'--	0	'--	'--	'--	'--	'--	'--	'--	TRUE	'--	'--	No	'--	'--	FFPE	Primary Tumor	1	'--	released	'--	'--	'--	Not Reported	'--	'--	'--
TCGA-THCA	f00fd40a-1254-4300-baf9-88528c453a2e	TCGA-DJ-A2Q4	3b928f34-6929-4612-8e02-3c93e2b6bf03	TCGA-DJ-A2Q4-10A	'--	'--	'--	'--	'--	121	'--	'--	'--	'--	'--	'--	'--	'--	FALSE	'--	'--	false	'--	'--	'--	Blood Derived Normal	10	'--	released	'--	'--	'--	Not Reported	'--	'--	'--
TCGA-THCA	f00fd40a-1254-4300-baf9-88528c453a2e	TCGA-DJ-A2Q4	595129de-c08c-4220-9ff2-53e034a8bffb	TCGA-DJ-A2Q4-01A	'--	'--	'--	'--	'--	121	'--	'--	'--	'--	'--	'--	210.0	'--	FALSE	'--	'--	true	'--	14A0CB22-0735-472B-910E-950B51DF9B1C	'--	Primary Tumor	1	'--	released	'--	'--	'--	Not Reported	'--	'--	'--
TCGA-THCA	55e03ffc-f006-4ec8-8e5d-a738ff091f8a	TCGA-EM-A2OV	b86108e7-4a78-4dd9-b5b6-0f88712f36ec	TCGA-EM-A2OV-01Z	'--	'--	'--	'--	'--	'--	0	'--	'--	'--	'--	'--	'--	'--	TRUE	'--	'--	No	'--	'--	FFPE	Primary Tumor	1	'--	released	'--	'--	'--	Not Reported	'--	'--	'--
TCGA-THCA	55e03ffc-f006-4ec8-8e5d-a738ff091f8a	TCGA-EM-A2OV	d814c22e-d964-4a92-ae43-194970962342	TCGA-EM-A2OV-10A	'--	'--	'--	'--	'--	297	'--	'--	'--	'--	'--	'--	'--	'--	FALSE	'--	'--	false	'--	'--	'--	Blood Derived Normal	10	'--	released	'--	'--	'--	Not Reported	'--	'--	'--
TCGA-THCA	55e03ffc-f006-4ec8-8e5d-a738ff091f8a	TCGA-EM-A2OV	1183bcb5-50a7-4cc0-a94c-732636b7ee7d	TCGA-EM-A2OV-01A	'--	'--	'--	'--	'--	205	'--	'--	'--	'--	'--	'--	150.0	'--	FALSE	'--	'--	false	'--	AE90D1AA-219B-49A9-8BF5-864EB67A572D	'--	Primary Tumor	1	'--	released	'--	'--	'--	Not Reported	'--	'--	'--
TCGA-THCA	e62adac4-803a-4d94-9ae0-7b1a49041799	TCGA-DJ-A3VJ	454cc0d2-ce73-44f2-aeba-1f132ea0af57	TCGA-DJ-A3VJ-10A	'--	'--	'--	'--	'--	541	'--	'--	'--	'--	'--	'--	'--	'--	FALSE	'--	'--	false	'--	'--	'--	Blood Derived Normal	10	'--	released	'--	'--	'--	Not Reported	'--	'--	'--
TCGA-THCA	e62adac4-803a-4d94-9ae0-7b1a49041799	TCGA-DJ-A3VJ	9f58656f-9a14-493a-b370-693c213129db	TCGA-DJ-A3VJ-01Z	'--	'--	'--	'--	'--	'--	0	'--	'--	'--	'--	'--	'--	'--	TRUE	'--	'--	No	'--	'--	FFPE	Primary Tumor	1	'--	released	'--	'--	'--	Not Reported	'--	'--	'--
TCGA-THCA	e62adac4-803a-4d94-9ae0-7b1a49041799	TCGA-DJ-A3VJ	2853c5ae-6d38-43fe-91df-e7ec755349dc	TCGA-DJ-A3VJ-01A	'--	'--	'--	'--	'--	541	'--	'--	'--	'--	'--	'--	200.0	'--	FALSE	'--	'--	true	'--	C8FBA360-6E43-4B3C-8D77-C0E57EB7937C	'--	Primary Tumor	1	'--	released	'--	'--	'--	Not Reported	'--	'--	'--
TCGA-THCA	93691bae-f1bd-437e-ae72-b50736d1e29a	TCGA-E8-A417	5b67c1c8-b7a5-44c1-9fe1-86a89cd9a0c7	TCGA-E8-A417-01Z	'--	'--	'--	'--	'--	'--	0	'--	'--	'--	'--	'--	'--	'--	TRUE	'--	'--	No	'--	'--	FFPE	Primary Tumor	1	'--	released	'--	'--	'--	Not Reported	'--	'--	'--
TCGA-THCA	93691bae-f1bd-437e-ae72-b50736d1e29a	TCGA-E8-A417	e6dda1c7-0abd-4b5a-8e22-6509a322974e	TCGA-E8-A417-10A	'--	'--	'--	'--	'--	52	'--	'--	'--	'--	'--	'--	'--	'--	FALSE	'--	'--	false	'--	'--	'--	Blood Derived Normal	10	'--	released	'--	'--	'--	Not Reported	'--	'--	'--
TCGA-THCA	93691bae-f1bd-437e-ae72-b50736d1e29a	TCGA-E8-A417	73ba5f01-96ae-414b-923a-de9500f72e64	TCGA-E8-A417-01A	'--	'--	'--	'--	'--	52	'--	'--	'--	'--	'--	'--	370.0	'--	FALSE	'--	'--	true	'--	F78F1D53-5654-494C-978D-C0575D52D46F	'--	Primary Tumor	1	'--	released	'--	'--	'--	Not Reported	'--	'--	'--
TCGA-THCA	c53167d4-14da-40cc-b30a-35eb3967b8df	TCGA-EM-A22J	a988fc4f-a98e-4ba0-b648-7b416cbb0abe	TCGA-EM-A22J-01A	'--	'--	'--	'--	'--	70	'--	'--	'--	'--	'--	'--	130.0	'--	FALSE	'--	'--	false	'--	D007B2FA-8E60-4C50-832B-7E3E320DDD97	'--	Primary Tumor	1	'--	released	'--	'--	'--	Not Reported	'--	'--	'--
TCGA-THCA	c53167d4-14da-40cc-b30a-35eb3967b8df	TCGA-EM-A22J	f3784a29-7ff6-4055-a7dd-9edae74120e4	TCGA-EM-A22J-10A	'--	'--	'--	'--	'--	154	'--	'--	'--	'--	'--	'--	'--	'--	FALSE	'--	'--	false	'--	'--	'--	Blood Derived Normal	10	'--	released	'--	'--	'--	Not Reported	'--	'--	'--
TCGA-THCA	c53167d4-14da-40cc-b30a-35eb3967b8df	TCGA-EM-A22J	1b197db6-6201-4645-a07b-233ffb099e53	TCGA-EM-A22J-01Z	'--	'--	'--	'--	'--	'--	0	'--	'--	'--	'--	'--	'--	'--	TRUE	'--	'--	No	'--	'--	FFPE	Primary Tumor	1	'--	released	'--	'--	'--	Not Reported	'--	'--	'--
TCGA-THCA	90507baa-b716-4bcf-a18e-9d8ae97d809a	TCGA-EL-A3T6	77038d13-de93-4357-9dda-af1a3e2c02a9	TCGA-EL-A3T6-11A	'--	'--	'--	'--	'--	3292	'--	'--	'--	'--	'--	'--	250.0	'--	FALSE	'--	'--	true	'--	'--	'--	Solid Tissue Normal	11	'--	released	'--	'--	'--	Not Reported	'--	'--	'--
TCGA-THCA	90507baa-b716-4bcf-a18e-9d8ae97d809a	TCGA-EL-A3T6	e351c920-20ac-4a04-8d81-3e95f1197821	TCGA-EL-A3T6-01Z	'--	'--	'--	'--	'--	'--	0	'--	'--	'--	'--	'--	'--	'--	TRUE	'--	'--	No	'--	'--	FFPE	Primary Tumor	1	'--	released	'--	'--	'--	Not Reported	'--	'--	'--
TCGA-THCA	90507baa-b716-4bcf-a18e-9d8ae97d809a	TCGA-EL-A3T6	61367375-8317-4cae-86cf-2fd65ab8abc8	TCGA-EL-A3T6-01A	'--	'--	'--	'--	'--	3292	'--	'--	'--	'--	'--	'--	310.0	'--	FALSE	'--	'--	true	'--	146DAFAC-42A9-4AFB-805A-6E970520D880	'--	Primary Tumor	1	'--	released	'--	'--	'--	Not Reported	'--	'--	'--
TCGA-THCA	a4a217c1-66e8-4cc5-805a-1172ce5da721	TCGA-DE-A4M8	d725b95f-9e9c-4be2-b8c8-1930bd4ca9ab	TCGA-DE-A4M8-10A	'--	'--	'--	'--	'--	104	'--	'--	'--	'--	'--	'--	'--	'--	FALSE	'--	'--	false	'--	'--	'--	Blood Derived Normal	10	'--	released	'--	'--	'--	Not Reported	'--	'--	'--
TCGA-THCA	a4a217c1-66e8-4cc5-805a-1172ce5da721	TCGA-DE-A4M8	d3c59d4c-e370-45ec-800b-e6aaa05d2bdf	TCGA-DE-A4M8-01A	'--	'--	'--	'--	'--	104	'--	'--	'--	'--	'--	'--	300.0	'--	FALSE	'--	'--	false	'--	9DAE2966-D92F-4436-B3E3-5BC1923295BB	'--	Primary Tumor	1	'--	released	'--	'--	'--	Not Reported	'--	'--	'--
TCGA-THCA	a4a217c1-66e8-4cc5-805a-1172ce5da721	TCGA-DE-A4M8	b78078a1-7748-4141-a4b5-9c91cf931526	TCGA-DE-A4M8-01Z	'--	'--	'--	'--	'--	'--	0	'--	'--	'--	'--	'--	'--	'--	TRUE	'--	'--	No	'--	'--	FFPE	Primary Tumor	1	'--	released	'--	'--	'--	Not Reported	'--	'--	'--
TCGA-THCA	1f3915cb-718c-42ae-ab0a-ce62b8664995	TCGA-EL-A3ZN	ac042263-2e69-4ea2-811c-a5808bb05983	TCGA-EL-A3ZN-01Z	'--	'--	'--	'--	'--	'--	0	'--	'--	'--	'--	'--	'--	'--	TRUE	'--	'--	No	'--	'--	FFPE	Primary Tumor	1	'--	released	'--	'--	'--	Not Reported	'--	'--	'--
TCGA-THCA	1f3915cb-718c-42ae-ab0a-ce62b8664995	TCGA-EL-A3ZN	e6a9e7d0-6a1c-4152-bfd3-439db74fe055	TCGA-EL-A3ZN-11A	'--	'--	'--	'--	'--	1515	'--	'--	'--	'--	'--	'--	210.0	'--	FALSE	'--	'--	false	'--	'--	'--	Solid Tissue Normal	11	'--	released	'--	'--	'--	Not Reported	'--	'--	'--
TCGA-THCA	1f3915cb-718c-42ae-ab0a-ce62b8664995	TCGA-EL-A3ZN	1ef9da2a-0e06-4a28-b9f5-5d900a9fc55e	TCGA-EL-A3ZN-01A	'--	'--	'--	'--	'--	1515	'--	'--	'--	'--	'--	'--	190.0	'--	FALSE	'--	'--	false	'--	88D047C4-3144-4627-A7E8-2035D5C14852	'--	Primary Tumor	1	'--	released	'--	'--	'--	Not Reported	'--	'--	'--
TCGA-THCA	7cec93da-42c9-495d-8110-9fb43763041b	TCGA-FK-A4UB	8745a636-6e9f-4989-a8f7-16f29503266b	TCGA-FK-A4UB-01A	'--	'--	'--	'--	'--	2822	'--	'--	'--	'--	'--	'--	40.0	'--	FALSE	'--	'--	true	'--	689C08E4-6032-4933-9F13-FD89AEBD3615	'--	Primary Tumor	1	'--	released	'--	'--	'--	Not Reported	'--	'--	'--
TCGA-THCA	7cec93da-42c9-495d-8110-9fb43763041b	TCGA-FK-A4UB	305e2c81-56a9-4c51-ab9b-c87ddc464406	TCGA-FK-A4UB-10A	'--	'--	'--	'--	'--	2822	'--	'--	'--	'--	'--	'--	'--	'--	FALSE	'--	'--	false	'--	'--	'--	Blood Derived Normal	10	'--	released	'--	'--	'--	Not Reported	'--	'--	'--
TCGA-THCA	7cec93da-42c9-495d-8110-9fb43763041b	TCGA-FK-A4UB	fb581a6c-a4bd-4d20-9567-425aa6b376cd	TCGA-FK-A4UB-01Z	'--	'--	'--	'--	'--	'--	0	'--	'--	'--	'--	'--	'--	'--	TRUE	'--	'--	No	'--	'--	FFPE	Primary Tumor	1	'--	released	'--	'--	'--	Not Reported	'--	'--	'--
TCGA-THCA	6ff5c8bd-9929-43ee-b53c-3c7c0b23f97b	TCGA-KS-A4I1	2fa39c2b-6fb2-4774-8c0d-47b0682367c0	TCGA-KS-A4I1-01Z	'--	'--	'--	'--	'--	'--	0	'--	'--	'--	'--	'--	'--	'--	TRUE	'--	'--	No	'--	'--	FFPE	Primary Tumor	1	'--	released	'--	'--	'--	Not Reported	'--	'--	'--
TCGA-THCA	6ff5c8bd-9929-43ee-b53c-3c7c0b23f97b	TCGA-KS-A4I1	ecf12637-bd41-416b-b352-9cb7653839a5	TCGA-KS-A4I1-11A	'--	'--	'--	'--	'--	239	'--	'--	'--	'--	'--	'--	30.0	'--	FALSE	'--	'--	false	'--	'--	'--	Solid Tissue Normal	11	'--	released	'--	'--	'--	Not Reported	'--	'--	'--
[truncated: 135 more rows]

## Sheet: S2
Table S2. Clinical data for THCA samples in the TCGA project downloaded from GDC data portal.
[truncated: 1,005 more rows]
[truncated: 131 more columns]

[truncated: 4 more sheets: S3, S4, S5, S6]
